# Supplementary material for: Erythropoietin alleviates syndrome-associated intellectual disability and autism-like behavior in Zbtb20-haploinsufficient Primrose syndrome mouse model
Source: JCI journal article supplement (doi:10.1172/jci.insight.200021), 2026-02-23
Supplement: sd1 [file 1]

# **Erythropoietin alleviates intellectual disability and autism-like behavior of mice caused by *Zbtb20* haploinsufficiency, a construct-valid model of Primrose syndrome**

## **- *Supplementary Methods* -**

### **Behavioral characterization of the original *Zbtb20* cohort**

**Open Field:** To assess exploratory behavior in a novel environment, mice were positioned in the center of a well-lit, gray, circular Perspex area (120 cm diameter, 25 cm height of outer wall). Initially, the animals latency to reach the outer wall was measured. Automated tracking (Viewer3, Biobserve, Bonn, Germany), commenced for a duration of 7min once the animals reached the outer wall independently, or were positioned there following a cut-off time of 180s. Mouse movement was tracked throughout the digitally defined zones of the outer periphery, center and the intermediate zone in between. Analyzed readouts were escape latency to the periphery, time spent, distance covered and average velocity within the respective zones and zone crossings. Animals were tested at the age of 7 (males) and 10 (females) weeks, under a light intensity of 125 lx in the center.

**Hole Board:** In order to assess exploratory behavior and impulsivity, mice underwent testing in a Hole Board setup. On a 50 x 50 cm plate, encircled by nontransparent outer walls (35 cm high) and 2 cm above the ground of the box, were 16 holes (2 cm diameter) arranged in a 4x4 grid. Each mouse was individually placed into the setup for a duration of 5 minutes. The occurrence of head dips was monitored by light beam sensors positioned beneath the holes. The primary metric analyzed were the total number of visits to the holes and rigorous re-visits, defined as consecutive visits to the same hole within a 3 second interval. Animals were tested at the age of 8 (males) and 11 (females) weeks, under a light intensity of 15 lx.

**Y-Maze:** To assess working memory, mice were positioned at the end of one randomly selected arm within a Y-shaped setup (each arm 43 cm long, 7.5 cm wide, 13 cm high). Over a period of 5 minutes, the mice were recorded (Viewer3, Biobserve, Bonn, Germany) as they were permitted to explore the setup freely. Upon entering a new arm and subsequently exiting it, it was noted whether the mice returned to the most recent arm they had visited (non-alternating entry) or ventured into the other arm (alternating

entry). Analyzed readouts were the amount of alternating, non-alternating and total entries and the delta between alternating and non-alternating entries. Animals were tested at the age of 8 (males) and 11 (females) weeks, under a light intensity of 15 lx.

**Social Interaction in Pairs:** Within a neutral enclosure (40x40x40 cm), supplemented with bedding, test mice were individually habituated over a period of two consecutive days (10 min/day). On the third day, a social interaction test was conducted by pairing two unfamiliar mice of the same genotype and sex within the neutral enclosure for a duration of 10 minutes. The movements and behaviors of the mice were captured by an A655sc infrared thermography camera (FLIR Systems, Oregon, USA), recording images at 640x480 pixels and a framerate of 25Hz. The camera was linked to a computer located in a separate room, where the ResearchIR software (FLIR Systems, Oregon, USA) facilitated the control and adjustment of the recording settings. The thermography camera was employed to enhance the contrast between the mice and the background (bedding), thereby improving the automated tracking and analysis of the interactions between the animals, a process overseen by Princeton University, USA. Animals were tested at the age of 9 (males) and 12 (females) weeks, under a light intensity of ~100 lx.

**Three Chamber Sociability Test:** The test for sociability and social memory was conducted as delineated in previous literature (1). The testing environment consisted of a rectangular box (61x40x22 cm), which was partitioned into three equal chambers (20x40x22 cm each) by Plexiglas walls. Each wall featured an opening 5 cm wide to facilitate access to all chambers. Prior to each trial, the entire chamber was cleaned and replenished with fresh bedding. During the initial habituation phase (1st trial), the test mouse was situated in the central chamber and granted a 5- minute exploration period. During this phase, access to the outer chambers was obstructed by plastic boxes. For the subsequent sociability test (2nd trial), an unfamiliar stimulus mouse of the same age and sex (referred to as stimulus mouse, C3H) was placed within a small metal cage (10 cm x 6 cm x 6 cm) located in one of the outer chambers. This arrangement permitted nose contact through the bars of the cage while preventing aggressive encounters. A similar cage was positioned in the other outer chamber but left vacant. Both cages were secured in place with a filled water bottle. All stimulus mice had been previously acclimated to the small cages and the novel environment. The test mouse was then reintroduced to the central chamber and allowed to freely explore the entire setup for a duration of 10 minutes. The mouse's

movements were automatically tracked and recorded using Viewer3 software (Biobserve, Bonn, Germany). The parameters assessed included the time spent within the respective chambers and in close proximity to the small metal cages (insets) housing the stimulus mice, the latency to the first approach, the number of zone crossings, and the total distance travelled. Animals were tested at the age of 10 (males) and 13 (females) weeks, under a light intensity of ~130 lx.

**Marble Burying:** This experimental design was employed to evaluate stereotypical and obsessive-compulsive behavior. The subject mouse was situated in a type III cage (Techniplast), which was filled with bedding to a depth of 5 cm. This cage was encircled by an insert (53x31x29 cm). Within, 24 glass marbles (1.0-1.5 cm diameter) were arranged in a 4x6 grid, with an approximate distance of 4 cm separating each marble. The test subjects were permitted to freely explore the area and interact with the marbles over a period of 30 minutes. The parameter analyzed was the number of marbles that were buried (at least to 2/3 their depth). Animals were tested at the age of 10 (males) and 13 (females) weeks, under a light intensity of ~7 lx.

**LABORAS:** The Laboratory Animal Behavior Observation Registration and Analysis System (LABORAS, Metris, Hoofddorp, Netherlands) has been comprehensively detailed in previous literature (2). To summarize, mice were individually housed in standard type 1 cages (Techniplast) with wood-chip bedding, and provided with food and water ad libitum. This arrangement was maintained for two nights as the mice acclimated to the experimental room. On the third night, the individually housed mice, still within their respective cages, were positioned on a sensor platform that was interfaced with a computer located in a separate room. This computer was equipped with the LABORAS software (Metris, Hoofddorp, Netherlands). The movements of the animals were converted into electrical signals and subsequently recorded. The software was capable of distinguishing between various behavioral categories, such as scratching, climbing, circling, grooming, immobility, locomotion, eating, and drinking. It also quantified the duration (in seconds) of each event and their frequency of occurrence. The recording of behavior commenced two hours prior to the dark phase and continued for a duration of 15 hours, facilitating subsequent analysis of the behavior exhibited during the dark phase. Animals were tested at the age of 11-12 (males) and 14-15 (females) weeks, under a light intensity of ~0 lx.

**Nestbuilding Test:** During the second night of the habituation phase of the LABORAS test, the experimenters removed the existing nesting material from the enclosures of the individually housed mice. This occurred two hours prior to the onset of the dark phase, at which point it was replaced with a nestlet composed of compressed cotton, weighing approximately 3 grams. The following morning, the quality of the nest building was evaluated by rating the nests on a scale from 1 to 5, as per the methodology outlined by Deacon in 2006 (3). Subsequent to this assessment, the cotton nestlet was removed and the mice were once again provided with their regular nesting material. Animals were tested at the age of 11-12 (males) and 14-15 (females) weeks, under a light intensity of ~0 lx.

**Ultrasound Vocalization:** Mice that were individually housed were subjected to testing for ultrasonic vocalizations (USVs) upon the introduction of an unfamiliar, age-matched female mouse (C57BL/6) into their respective home cages, as detailed in previous studies (4). Following a 2-minute habituation period, an anesthetized mouse (administered Avertin at a dosage of 300mg/kg body weight) was introduced into the cage with the test mouse, which could be either male or female. The USVs were recorded for a duration of 3 minutes using a microphone connected to a preamplifier. The recordings were analyzed at a sampling frequency of 300 kHz utilizing the Avisoft Recorder 4.2 software (Avisoft Bioacoustics, Berlin, Germany). The parameters analyzed included the number and duration of USVs, as well as the latency to the first call. The USVs were distinguished from other sounds using the whistles detection algorithm of the Avisoft-SASLab5.2 software (Avisoft Bioacoustics, Berlin, Germany). The selection criteria for this process were as follows: possible changes per step equaled 4 (4687 Hz), minimal continuity was set at 8 ms, and the possible frequency range was between 35 and 150 kHz. These criteria have been tested and successfully implemented in previous mouse studies (2, 4). Animals were tested at the age of 13 (males) and 16 (females) weeks, under a light intensity of ~55 lx.

**Prepulse Inhibition (PPI):** The procedure for this test has been comprehensively outlined in earlier studies (5). In brief, to evaluate sensorimotor gating, mice were situated within compact metal cages measuring 9 cm x 4 cm x 4 cm. This arrangement was designed to limit significant movement. These cages were subsequently positioned within sound-attenuating cabinets (TSE Systems, Bad Homburg, Germany) that were mounted on platforms equipped with sensors to monitor

the animals' movements. Following a period of habituation to a background noise level of 65 dB, acoustic stimuli were delivered via loudspeakers to induce startle reflexes. These stimuli varied in intensity (70, 75, 80, 120 dB) and were administered in a pseudo-random sequence. The amplitudes of the startle responses were averaged for each mouse across the various intensities. The Pre-Pulse Inhibition (PPI) was computed as a percentage of the startle response using the formula: %PPI = 100 - [(startle response following the pre-pulse)/(startle amplitude following the pulse only) x 100]. For the purposes of analysis, data from non-performing mice (those exhibiting negative PPI) were excluded from consideration. Animals were tested at the age of 13 (males) and 16 (females) weeks, under a light intensity of 0 lx.

**Morris Water Maze:** The methodology for this paradigm has been extensively detailed in earlier studies (5, 6). In summary, to evaluate spatial learning and memory, mice were introduced into a circular tank with a diameter of 120 cm and a height of 60 cm. The tank was filled with opaque water maintained at room temperature (~22°C), and featured a slightly submerged escape platform with a diameter of 10 cm. The movements of the mice were automatically tracked and recorded using Viewer3 software (Biobserve, Bonn, Germany). During the initial two days of the visual platform task, the extra maze cues were obscured by the tank walls due to the low water level. The escape platform was visually indicated by a flag. On the second day of the visual platform task, the location of the platform was altered. For the subsequent eight days of the hidden platform task, the platform was relocated once more and the flag was removed. The water level was raised to make the extra maze cues visible. Following this, the platform was removed and the mice were observed during a 'hidden probe trial'. The probe trial was followed by a four-day reversal hidden platform task. In this phase, the platform was relocated yet again. The reversal task was succeeded by another probe trial. During the visual, hidden, and reversal tasks, each day comprised four trials per mouse, each with a cut-off time of 90 seconds and an intertrial interval of five minutes to prevent fatigue. Between trials, the mice were individually housed in cages lined with paper towels and positioned on a heating pad to prevent hypothermia. The primary parameter analyzed was the escape latency. In the absence of a platform to reach, both probe trials consisted of a single 90-second trial per mouse. The parameters analyzed included the time spent in and the number of visits to the target quadrant (TQ), which previously contained the escape platform.

Animals were tested at the age of 14-16 (males) and 17-19 (females) weeks, under a light intensity of ~130 lx.

**Forced Swim Test:** The assessment of depression-like behavior was conducted in accordance with the methodology previously delineated (7). The subject mouse was introduced into a glass cylinder filled with water at approximately 24°C. The cylinder dimensions were 27 cm in height and 17 cm in diameter, with the water level maintained at around 15 cm. The primary parameter under analysis was the duration of immobility, measured in seconds. Immobility was characterized as periods during which the mouse, while maintaining an upright position, executed only minimal movements necessary to keep its head above the water surface. Animals were tested at the age of 17 (males) and 20 (females) weeks, under a light intensity of ~125 lx.

**Complex Wheel Running:** To stimulate the expression of cFos, a marker of neuronal activity, within hippocampal neurons, mice were exposed to a complex running wheel (CRW) apparatus for a duration of 4 hours (8). The mice were single housed in type III cages (42x26x18 cm, Tecniplast), each equipped with a CRW. This CRW is distinguished by its standardized configuration of randomly omitted bars (9, 10). Prior to the onset of the dark phase, the mice were allowed a 2-hour habituation period to acclimate to their new environment and the CRW. With the commencement of the dark phase, the voluntary running activity of the mice was automatically monitored for a 4-hour span using the Phenomaster software (TSE Systems). Animals were tested at the age of 18 (males) and 21 (females) weeks, under a light intensity of ~0 lx.

## **Behavioral characterization of additional second cohort**

**Neophobia:** In order to evaluate anxiety-like behavior in response to unfamiliar stimuli, mice were acclimatized to a neutral enclosure (dimensions: 40x40x40 cm) supplemented with bedding material, for a duration of 2 days at 10 minutes per day. On the subsequent third day, two identical objects (transparent glass bottles featuring an uneven surface, filled with violet-colored sand, with a height of 16.5 cm and a base diameter of 5.5 cm) were positioned at diametrically opposite locations within the enclosure. The subjects were then introduced into the enclosure and allowed a free exploration period of 5 minutes. The movements of the subjects were automatically monitored and documented using the Viewer3 software (developed by Biobserve,

Bonn, Germany). In addition to the entire enclosure area, circular regions of interest (ROIs) with a radius of 3.5 cm were digitally established around both objects to quantify the duration of interaction. Additional metrics included the distance traversed, the number of crossings between zones, and the frequency of visits to the ROIs. Animals were tested at the age of 7 (males) and 8 (females) weeks, under a light intensity of ~25 lx.

**Rotarod:** The rotarod system (Ugo Basile Srl, Comerio, Italy) features of a horizontal cylinder with a diameter of 3 cm. This cylinder, divided into 5 sections by 6 circular barriers, each with a width 6 cm, can accommodate up to five mice simultaneously for testing and can be set into rotation. Starting with 4 rpm, the speed increases automatically up to 40 rpm within 5 min. To acclimate the animals to the new setup, the Rotarod was activated, but the cylinder was kept stationary. Subsequently, up to 5 mice were positioned on the cylinder for a duration of 5min. To assess motor performance and learning, on the next two days up to 5 mice were placed onto the cylinder once per day. Once each mouse was safely positioned on top of the cylinder and facing the same direction, the cylinder was set into rotation, with the speed gradually increasing over a period of 5min. Analyzed readout is the latency to fall, measured by a light beam sensor below each of the 5 sections. Animals were tested at the age of 8 (males) and 9 (females) weeks with light intensity of ~300 lx.

**Grip Strength:** In order to evaluate muscular strength, mice were suspended by the tail and directed towards a horizontal metallic bar. Upon securing the bar with their forepaws, the mice were gently retracted from the setup, during which the maximum force exerted to maintain their grip on the bar was measured. This procedure was repeated for a total of three trials per mouse, and the average value was subsequently computed. Animals were tested at the age of 9 (males) and 10 (females) weeks, under a light intensity of ~350 lx.

**Marble Burying:** This test was performed as described before. Animals were tested at the age of 9 (males) and 10 (female) weeks, under a light intensity of ~7 lx.

**Sucrose Preference Test:** In order to evaluate anhedonia in mice, a two-bottle choice paradigm was employed, wherein the animals were granted unrestricted access to both tap water and a 2% sucrose solution (Merck, Darmstadt, Germany). Over a span of 48 hours, the mice were conditioned to consume water from two diminutive bottles, following which they were subjected to water deprivation, thereby initiating the sucrose preference test for the subsequent three days. The initial two days served as an

acclimatization period to the sucrose solution, while the data obtained on the third day was utilized to ascertain the actual sucrose preference. For the purpose of this test, mice that were previously housed in groups needed to be isolated. Consequently, they were individually accommodated in standard Type II cages (Tecniplast, Hohenpleiberg, Germany), each furnished with the aforementioned two bottles for a duration of 60 minutes. The volume of liquid consumed was quantified by weighing both bottles before and after each session. To account for potential side preference, the position of the bottle containing the sucrose solution was alternated. The calculation of sucrose preference was performed as follows: preference [%] = (sucrose solution intake [g] / total fluid intake [g]) × 100. Animals were tested at the age of 10 (males) and 11 (females) weeks, under a light intensity of ~40 lx.

**Buried Food Test:** In order to evaluate olfactory function, mice underwent a 5-day training regimen aimed at locating a piece of chocolate cereal concealed beneath wood-chip bedding. On the first day, the animals were acclimated to the testing cage (dimensions: 29.5×18.5×13 cm) through two separate 15-minute sessions. On the second day, the mice were once again acclimated to the testing cage for two 15-minute sessions, this time with a piece of chocolate cereal placed atop the bedding. Following this second acclimation session and until the conclusion of the buried food test, the mice were provided access to a standard diet for 1 hour post-acclimation, after which they were subjected to food deprivation until the next training session. The third and fourth days consisted of repetitions of the second day's training regimen. On the fifth day, a piece of chocolate cereal was buried approximately 1.5 cm beneath the bedding, and the mouse was introduced into the cage. The parameters assessed included the latency to the first digging attempts at the correct location and the latency to the first gnawing at the piece of cereal, with a cut-off time set at 300 seconds. To account for intrinsic motivation on that day, a final trial was conducted with the piece of cereal plainly visible atop the bedding. The parameter assessed during this trial was the latency until each mouse either grabbed the cereal or gnawed at it for the first time. Animals were tested at the age of ~11 (males) and ~12 (females) weeks, under a light intensity of ~60 lx.

**Tail Suspension Test:** In order to evaluate depression-like behavior, mice were subjected to the tail suspension test (11). Briefly, the subjects were affixed to the edge of a table by their tails, suspended at a height of 72 cm above the

ground, and observed for a duration of 6 minutes. Subsequent to this, the recorded videos were analyzed with the objective of determining periods of immobility, measured in seconds. These periods were assessed in 2-minute blocks within the total experimental timeframe of 6 minutes. Animals were tested at the age of ~12 (males) and ~13 (females) weeks, under a light intensity of ~130 lx.

**Hot Plate Test:** This paradigm was employed to evaluate pain perception. Subjects were positioned on a preheated metal plate (approximately 55°C, 24 cm in diameter, Ugo Basile Srl, Comerio, Italy) encircled by a transparent Plexiglas cylinder (17 cm in diameter, 30 cm in height) to deter the mice from vacating the plate. The parameter analyzed was the latency to exhibit responses to thermal sensation, measured in seconds, which were characterized as paw licking, lifting, or jumping. Upon the exhibition of the initial response, the mice were promptly removed from the plate and returned to their home cage. A cut-off time of 40 seconds was enforced to prevent potential tissue damage. Animals were tested at the age of 12 (males) and 13 (females) weeks, under a light intensity of ~125 lx.

## Cell isolation from lymphoid organs

Mice were sacrificed by CO<sub>2</sub> and immediately processed for organ collection. Whole blood (250µL) was collected via cardiac puncture and transferred into EDTA coated tubes (REF 20.1341, Sarstedt). Red blood cells were lysed by incubating blood samples with 2mL ACK buffer (0.15M NH<sub>4</sub>Cl, 10mM KHCO<sub>3</sub>, 0.1mM EDTA, pH 7.2-7.4) for 15min at room temperature. White blood cells were harvested by centrifugation at 350g, washed with PBS, and stored on ice. Meanwhile, femur bones, spleen, and mesenteric lymph nodes were isolated and processed on ice. Bone marrow cells were harvested by flushing one femur bone per mouse with 10mL cold PBS using a 20G needle and filtering through 70µm nylon cell strainers (REF 431751, Corning). Lymph nodes and spleens were mechanically dissociated in 5mL PBS each, by gently grinding the organs through 70µm nylon cell strainers with syringe rubber plungers. Bone marrow cells and splenocytes were centrifuged and cell pellets were resuspended in 5mL ACK buffer and incubated 5min at room temperature for red blood cell lysis. To stop the lysis, 5mL PBS was added and samples were centrifuged. Cell pellets were resuspended in 10mL PBS and filtered through 70µm nylon cell strainers. For buffer exchange, the samples were centrifuged and resuspended in FACS buffer (2% BSA

in PBS). For staining, samples were transferred into V-bottom 96-well plates using the following volumes: blood = total sample; mesenteric lymph nodes = 200 $\mu$ L of 1mL total sample; bone marrow = 200 $\mu$ L of 2mL total sample; spleen = 200 $\mu$ L of 10mL total sample. After transfer, cells were centrifuged, resuspended with 100 $\mu$ L FACS buffer and 22 $\mu$ L staining master mix (composition see table below) and incubated 30min on ice. Stained cells were washed 2 times, resuspended in FACS buffer, and filtered through 35 $\mu$ m cell strainers into FACS tubes (REF 55.1579, Sarstedt). Data was acquired on a FACSymphony S6 (BD) and stopped after 5000 quantification beads were recorded per sample. A total of 120 samples (n=3-4 lymphoid tissues per mouse, n=6-8 mice per sex and genotype) were analyzed. One female wildtype mouse was excluded due to a hypertrophic spleen.

#### Staining master mix. Volumes per sample.

| RRID       | Marker                 | Fluorochrome | Clone     | Cat#            | Company     | Vol ( $\mu$ L) |
|------------|------------------------|--------------|-----------|-----------------|-------------|----------------|
| AB_2651134 | CD45                   | BUV395       | 30-F11    | 565967          | BD          | 0.25           |
| AB_2874241 | CD8a                   | BUV661       | 53-6.7    | 750023          | BD          | 0.25           |
| AB_2871390 | CD138                  | BB700        | 281-2     | 742124          | BD          | 0.5            |
| -          | CD44                   | BUV737       | IM7       | 612799          | BD          | 0.5            |
| -          | CD4                    | BUV563       | RM4-5     | 569182          | BD          | 0.25           |
| AB_2743990 | CD62L                  | BV480        | MEL-14    | 746726          | BD          | 0.25           |
| AB_2740505 | CD16/32                | BV786        | 2.4G2     | 740851          | BD          | 0.5            |
| AB_396675  | CD69                   | FITC         | H1.2F3    | 553236          | BD          | 1              |
| AB_396958  | CD19                   | AF700        | 1D3       | 557958          | BD          | 0.25           |
| AB_2565547 | CD27                   | BV421        | LG.3A10   | 124223          | Biolegend   | 0.5            |
| AB_2562679 | CD115                  | BV711        | AFS98     | 135515          | Biolegend   | 1              |
| AB_312793  | CD11b                  | PE-Cy5       | M1/70     | 101210          | Biolegend   | 0.5            |
| AB_389364  | NK1.1                  | PE-Cy7       | PK136     | 108714          | Biolegend   | 0.5            |
| -          | Ly6G                   | AF750        | 1A8       | FAB10371S-100UG | RND-Systems | 0.5            |
| -          | Brilliant stain buffer | -            | -         | 563794          | BD          | 10             |
| -          | CalibRITE beads        | APC          | LOT 20131 | 340487          | BD          | 5              |
| -          | Dead cells             | DAPI         | -         | D9542           | Sigma       | 0.2ng          |

#### High parameter flow cytometry analysis:

FCS files were imported to FlowJo v.10.9.0, and compensated using single stained controls. An empty 540LP/35BP channel in the 445nm Laser line was used to record autofluorescence. The data was automatically cleaned using the flowAI (12) plugin with default parameters, followed by manual clean-up gating on FSC-A vs. SSC-A to discriminate cells from beads, FSC-A vs. FSC-H for crude removal of doublets, and CD45-BUV395 vs. DAPI for identification of live hematopoietic (DAPI-, CD45+) cells. Live hematopoietic cells were downsampled to 10000 cells per sample using the DownSample V3 plugin in FlowJo. Downsampled live hematopoietic cell populations of all 120 samples were concatenated. Uniform gating was performed on

the concatenated sample as described in Supplementary Figure 3A. First, granulocytes were identified based on high SSC-A and Ly6G-AF750. The remaining cells were gated for CD115 and NK1.1 to identify NK cells (NK1.1+) and monocytes (CD115+). CD115 and NK1.1 negative cells were gated for CD11b for residual myeloid cells (CD11b+, CD16/32+, SSC-A low, CD115-). CD115, CD11b, and NK1.1 triple negative cells were gated for CD16/32 (FcR, Fc receptor) and CD19 to identify B cells (CD19+, FcR+). Negative cells were gated for CD8 and CD4 for CD8+ and CD4+ T-cells, respectively. These major immune cell subsets were further subdivided based on their expression of CD27, CD138, CD44, and CD62L into the following distinct minor immune cell subsets: CD27-/CD138- B cells; CD27+/CD138- B cells; CD138+ antibody secreting cells (13); CD62L+/CD44- naive T-cells, CD62L-/CD44+ effector/ effector memory T-cells, CD62L+/CD44- central memory T- cells, and CD62L-/CD44- T-cells (14–16); CD11b-/CD62L+ monocytes (mostly in bone marrow), CD62L+/CD11b+ monocytes, and CD62L-/CD11b+ monocytes (17); CD62L+/CD27+ NK cells; CD62L+/CD27- NK cells, CD62L-/CD27+ NK cells, and CD62L-/CD27- NK cells (18). For dimensionality reduction, the UMAP-R plugin (19) was run using compensated parameters, uncompensated CD69-FITC, FSC-A, SSC-A, the Euclidian distance metric, 60 nearest neighbors, a minimum distance of 0.5, and 2 components. To quantify the major and minor immune cell subsets within individual samples, the concatenated file was split based on keywords specifying the animal identifier, sex, and organ. Uniform gates were applied on individual samples and cell counts of all immune cell subsets were exported. The major immune cell subsets were normalized to the total number of quantified live hematopoietic cells (10000 per sample). The minor immune cell subsets were normalized to the respective major immune cell subset (parent population).

## References

1. Moy SS, et al. Sociability and preference for social novelty in five inbred strains: an approach to assess autistic-like behavior in mice. *Genes Brain Behav.* 2004;3(5):287–302.
2. El-Kordi A, et al. Development of an autism severity score for mice using Nlgn4 null mutants as a construct-valid model of heritable monogenic autism. *Behav Brain Res.* 2013;251:41–49.
3. Deacon RMJ. Assessing nest building in mice. *Nat Protoc.* 2006;1(3):1117–1119.
4. Hammerschmidt K, et al. The structure and usage of female and male mouse ultrasonic vocalizations reveal only minor differences. *PLoS One.* 2012;7(7):e41133.

5. Dere E, et al. Heterozygous *ambra1* deficiency in mice: a genetic trait with autism-like behavior restricted to the female gender. *Front Behav Neurosci*. 2014;8:181.
6. Morris RGM. Spatial localization does not require the presence of local cues. *Learn Motiv*. 1981;12(2):239–260.
7. Porsolt RD, et al. Depression: a new animal model sensitive to antidepressant treatments. *Nature*. 1977;266(5604):730–732.
8. Wakhloo D, et al. Functional hypoxia drives neuroplasticity and neurogenesis via brain erythropoietin. *Nat Commun*. 2020;11(1):1313.
9. Liebetanz D, et al. A highly sensitive automated complex running wheel test to detect latent motor deficits in the mouse MPTP model of Parkinson's disease. *Exp Neurol*. 2007;205(1):207–213.
10. McKenzie IA, et al. Motor skill learning requires active central myelination. *Science*. 2014;346(6207):318–322.
11. Steru L, et al. The tail suspension test: a new method for screening antidepressants in mice. *Psychopharmacology (Berl)*. 1985;85(3):367–370.
12. Monaco G, et al. flowAI: automatic and interactive anomaly discerning tools for flow cytometry data. *Bioinformatics*. 2016;32(16):2473–2480.
13. Brynjolfsson SF, et al. Long-lived plasma cells in mice and men. *Front Immunol*. 2018;9:2673.
14. Gerberick GF, et al. Selective modulation of T cell memory markers CD62L and CD44 on murine draining lymph node cells following allergen and irritant treatment. *Toxicol Appl Pharmacol*. 1997;146(1):1–10.
15. Nakajima Y, et al. Critical role of the CD44<sup>low</sup>CD62L<sup>low</sup> CD8<sup>+</sup> T cell subset in restoring antitumor immunity in aged mice. *Proc Natl Acad Sci U S A*. 2021;118(23):e2103730118.
16. Sckisel GD, et al. Differential phenotypes of memory CD4 and CD8 T cells in the spleen and peripheral tissues following immunostimulatory therapy. *J Immunother Cancer*. 2017;5:33.
17. Geissmann F, et al. Blood monocytes consist of two principal subsets with distinct migratory properties. *Immunity*. 2003;19(1):71–82.
18. Goh W, Huntington ND. Regulation of murine natural killer cell development. *Front Immunol*. 2017;8:130.
19. McInnes L, Healy J, and Melville J. UMAP: uniform manifold approximation and projection for dimension reduction. *arXiv preprint arXiv:180203426*. 2018.

# Supplementary Figure 1 – Behavior Females

## Nest Building Test

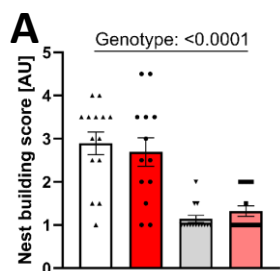

## LABORAS: Repetitive Behavior

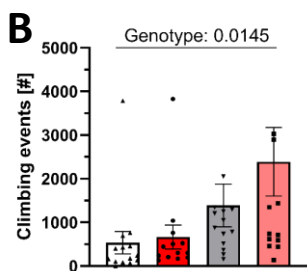

## Hot Plate Test: Nociception

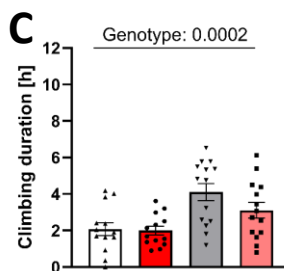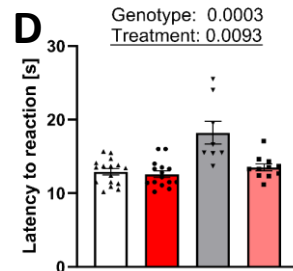

## Morris Water Maze: Spatial Learning and Memory & Reversal Learning and Memory

### Hidden Task

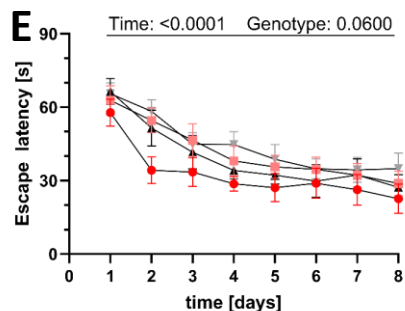

### Hidden Probe

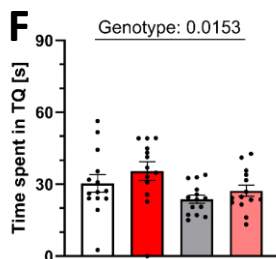

### Reversal Task

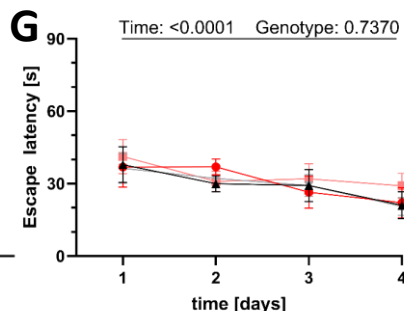

### Reversal Probe

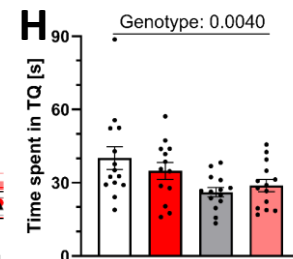

## Hole Board

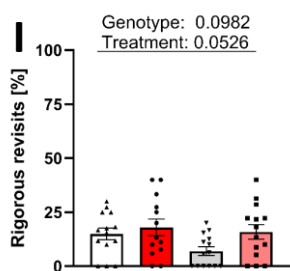

## Marble Burying 1<sup>st</sup> & 2<sup>nd</sup> Cohort

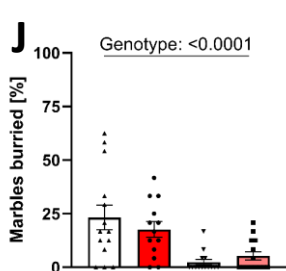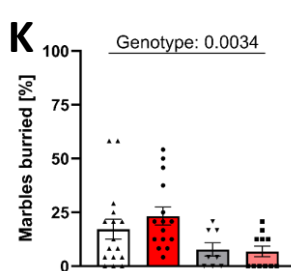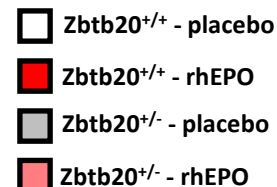

## Hyperactivity

### Open Field

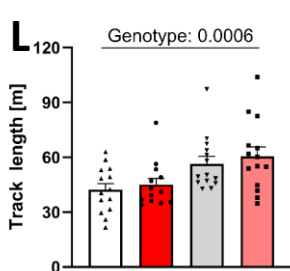

### MWM Hidden Probe

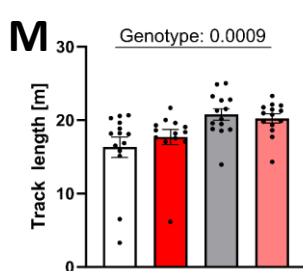

### MWM Reversal Probe

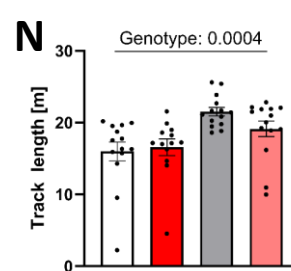

### LABORAS

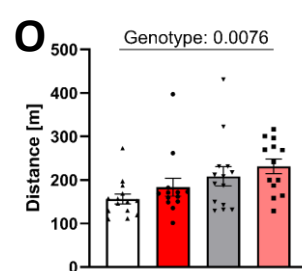

# Supplementary Figure 2 – Behavior & MRI Females

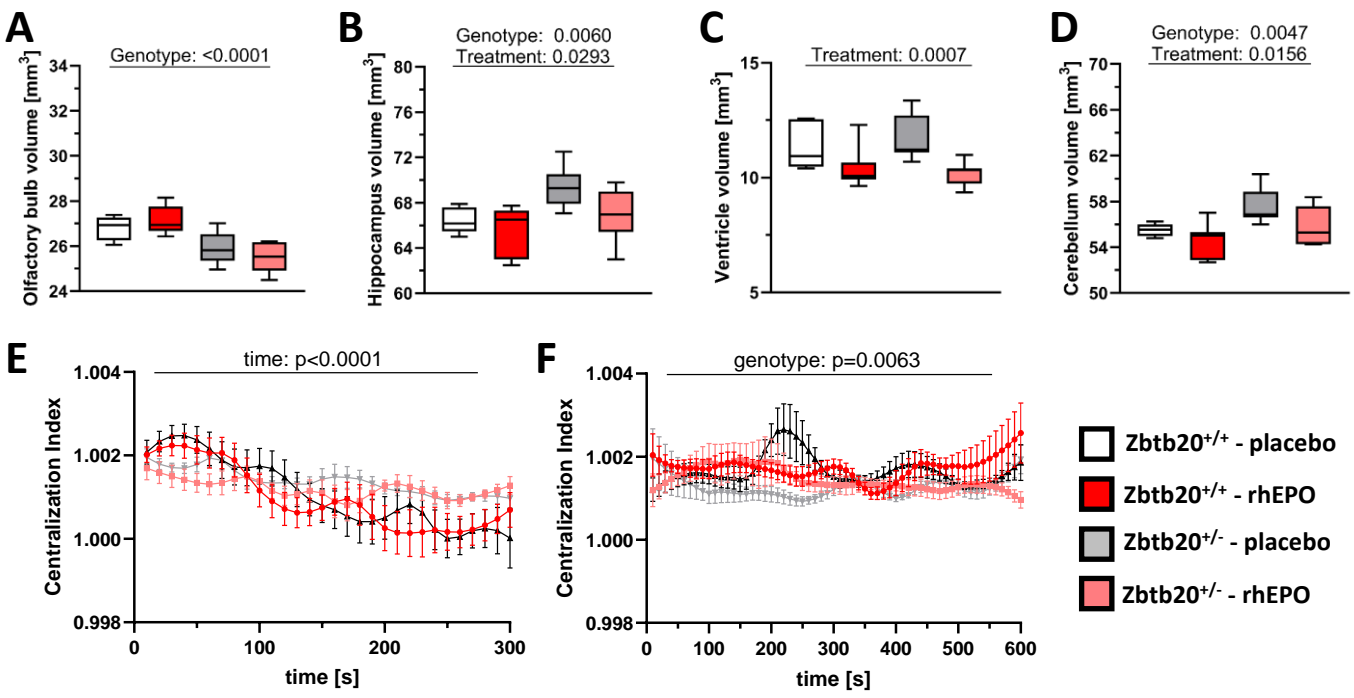

# Supplementary Figure 3

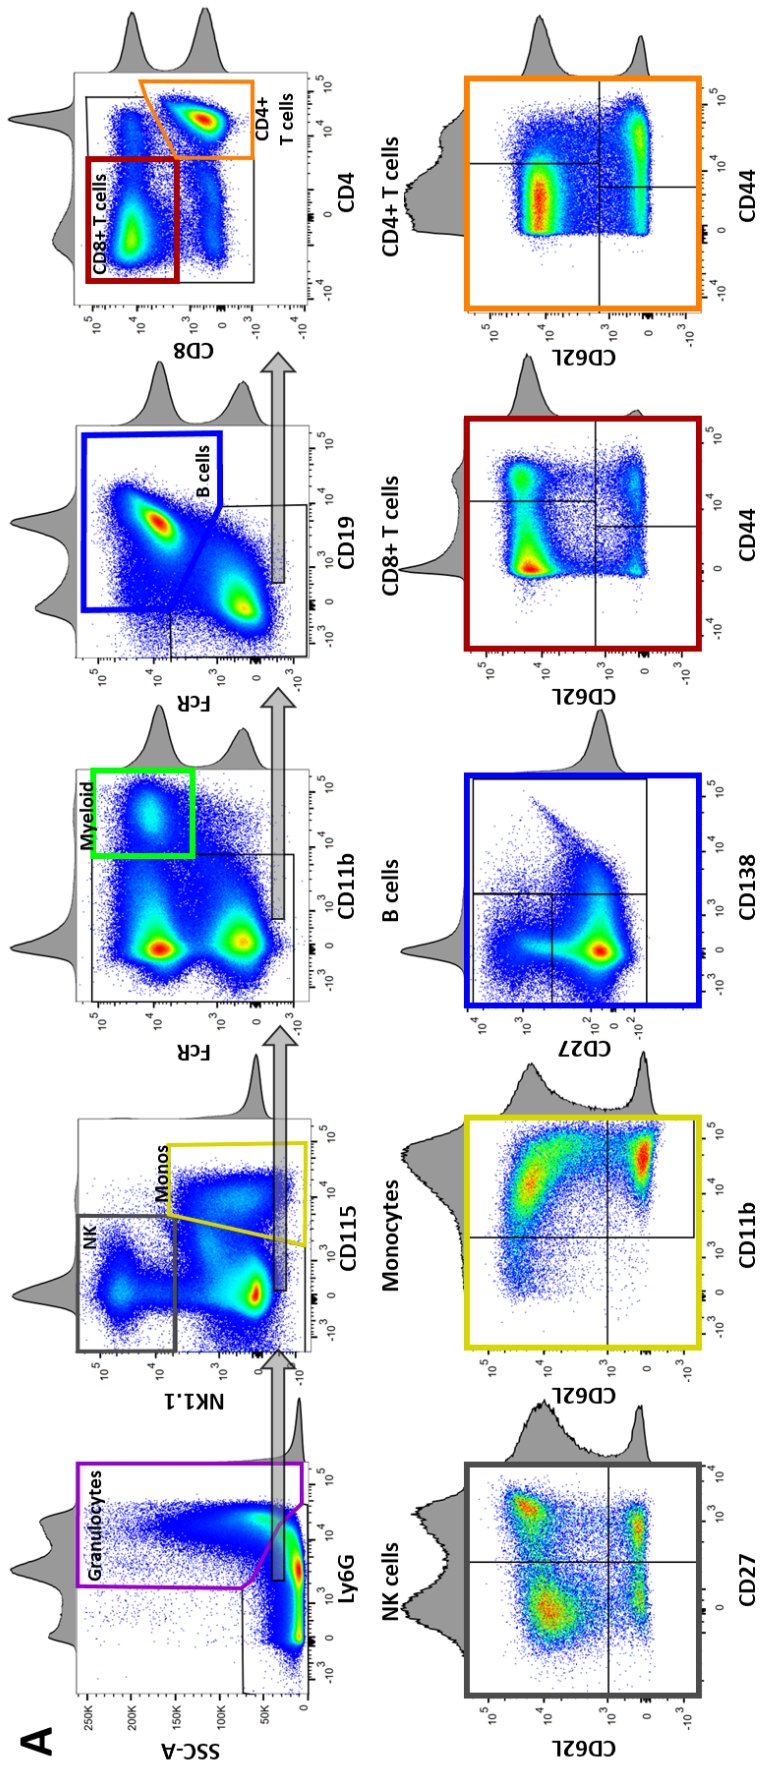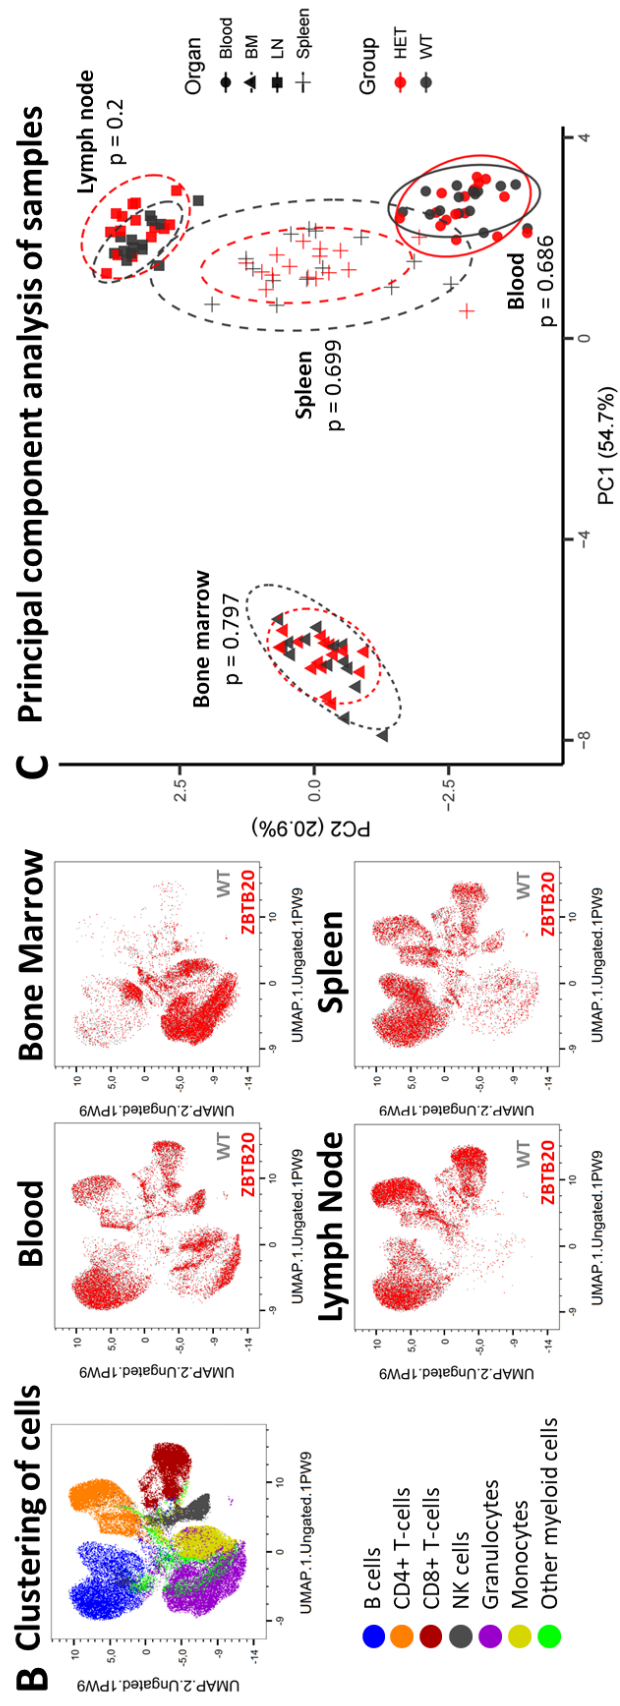

| 1st Cohort Males                                    | Group 1                         |          | Group 2                       |          | Group 3                         |          | Group 4                       |          | Comparisons        |               |            |               |                     |               |            |               |
|-----------------------------------------------------|---------------------------------|----------|-------------------------------|----------|---------------------------------|----------|-------------------------------|----------|--------------------|---------------|------------|---------------|---------------------|---------------|------------|---------------|
|                                                     | ZBTB20 <sup>fl/fl</sup> placebo |          | ZBTB20 <sup>fl/fl</sup> rhEPO |          | ZBTB20 <sup>fl/fl</sup> placebo |          | ZBTB20 <sup>fl/fl</sup> rhEPO |          | Group 1vs2         |               | Group 1vs3 |               | Group 2vs4          |               | Group 3vs4 |               |
|                                                     | mean ± SD                       | n        | mean ± SD                     | n        | mean ± SD                       | n        | mean ± SD                     | n        | test               | p-value       | test       | p-value       | test                | p-value       | test       | p-value       |
| <b>Open Field</b>                                   |                                 |          |                               |          |                                 |          |                               |          |                    |               |            |               |                     |               |            |               |
| Escape latency [s]                                  | 36.6 ± 28.1                     | 13       | 28.5 ± 21.9                   | 14       | 30.6 ± 28.1                     | 15       | 38.0 ± 49.2                   | 16       | U                  | 0.7836        | U          | 0.5774        | U                   | 0.8455        | U          | 0.9300        |
| Track length total [cm]                             | 3536.0 ± 736.4                  | 13       | 4059.0 ± 589.8                | 14       | 4310.0 ± 1253.0                 | 15       | 4175.0 ± 1285.0               | 16       | t                  | 0.0545        | t          | 0.0549        | t                   | 0.7499        | t          | 0.7688        |
| Velocity avg [cm/s]                                 | 8.4 ± 1.8                       | 13       | 9.7 ± 1.4                     | 14       | 10.3 ± 3.0                      | 15       | 9.9 ± 3.1                     | 16       | t                  | 0.0545        | t          | 0.0550        | t                   | 0.7496        | t          | 0.7694        |
| Zone crossings [#]                                  | 606.5 ± 96.0                    | 13       | 656.4 ± 69.8                  | 14       | 688.7 ± 136.3                   | 15       | 670.9 ± 149.6                 | 16       | t                  | 0.1386        | t          | 0.0741        | t                   | 0.7329        | t          | 0.7306        |
| Periphery - time within [s]                         | 290.2 ± 45.5                    | 13       | 301.6 ± 33.9                  | 14       | 329.4 ± 42.5                    | 15       | 321.7 ± 40.6                  | 16       | t                  | 0.4692        | t          | <b>0.0275</b> | t                   | 0.1519        | t          | 0.6162        |
| Periphery - time within [s]                         |                                 |          |                               |          | 2way ANOVA                      |          |                               |          | Genotype: p=0.0085 |               |            |               | Treatment: p=0.9090 |               |            |               |
| Periphery - track length within [cm]                | 1870.0 ± 528.2                  | 13       | 2342.0 ± 494.3                | 14       | 2791.0 ± 971.2                  | 15       | 2593.0 ± 942.3                | 16       | t                  | <b>0.0248</b> | t          | <b>0.0044</b> | t                   | 0.3623        | t          | 0.5682        |
| Periphery - velocity avg within [cm/s]              | 6.5 ± 1.6                       | 13       | 7.8 ± 1.4                     | 14       | 8.5 ± 2.7                       | 15       | 8.1 ± 2.9                     | 16       | t                  | <b>0.0357</b> | t          | <b>0.0248</b> | t                   | 0.6910        | t          | 0.7244        |
| Periphery - visits to [#]                           | 30.0 ± 9.6                      | 13       | 31.4 ± 8.4                    | 14       | 26.0 ± 10.2                     | 15       | 29.5 ± 9.9                    | 16       | U                  | 0.6929        | U          | 0.2953        | U                   | 0.8137        | U          | 0.3415        |
| Intermediate - time within [s]                      | 104.4 ± 37.5                    | 13       | 97.6 ± 28.2                   | 14       | 71.6 ± 31.1                     | 15       | 80.2 ± 29.1                   | 16       | U                  | 0.3754        | U          | <b>0.0198</b> | U                   | 0.1306        | U          | 0.4332        |
| Intermediate - time within [s]                      |                                 |          |                               |          | 2way ANOVA                      |          |                               |          | Genotype: p=0.0040 |               |            |               | Treatment: p=0.8630 |               |            |               |
| Intermediate - track length within [cm]             | 1386.0 ± 411.4                  | 13       | 1489.0 ± 362.6                | 14       | 1254.0 ± 518.3                  | 15       | 1347.0 ± 526.5                | 16       | t                  | 0.4970        | t          | 0.4617        | t                   | 0.3930        | t          | 0.6250        |
| Intermediate - velocity avg within [cm/s]           | 13.7 ± 2.1                      | 13       | 15.5 ± 2.4                    | 14       | 18.5 ± 5.0                      | 15       | 16.9 ± 3.4                    | 16       | t                  | <b>0.0495</b> | t          | <b>0.0033</b> | t                   | 0.2128        | t          | 0.3167        |
| Intermediate - visits to [#]                        | 42.9 ± 13.1                     | 13       | 41.9 ± 10.5                   | 14       | 37.5 ± 15.3                     | 15       | 40.1 ± 14.5                   | 16       | t                  | 0.8181        | t          | 0.3184        | t                   | 0.6989        | t          | 0.6326        |
| Center - time within [s]                            | 25.4 ± 13.8                     | 13       | 20.7 ± 10.6                   | 14       | 19.1 ± 14.7                     | 15       | 18.1 ± 13.4                   | 16       | U                  | 0.4020        | U          | 0.2305        | U                   | 0.2939        | U          | 0.8530        |
| Center - time within [s]                            |                                 |          |                               |          | 2way ANOVA                      |          |                               |          | Genotype: p=0.2078 |               |            |               | Treatment: p=0.4447 |               |            |               |
| Center - track length within [cm]                   | 280.5 ± 121.7                   | 13       | 228.4 ± 73.0                  | 14       | 264.2 ± 189.3                   | 15       | 234.9 ± 157.9                 | 16       | t                  | 0.1966        | t          | 0.7867        | t                   | 0.4726        | U          | 0.7405        |
| Center - velocity avg within [cm/s]                 | 11.7 ± 3.5                      | 13       | 12.4 ± 3.7                    | 14       | 16.6 ± 6.0                      | 15       | 14.7 ± 5.6                    | 16       | t                  | 0.6437        | t          | <b>0.0139</b> | U                   | 0.3084        | U          | 0.2597        |
| Center - visits to [#]                              | 12.5 ± 5.4                      | 13       | 10.4 ± 4.1                    | 14       | 11.1 ± 8.7                      | 15       | 10.3 ± 5.8                    | 16       | t                  | 0.2507        | U          | 0.2667        | t                   | 0.9534        | U          | 0.9762        |
| <b>Hole Board</b>                                   |                                 |          |                               |          |                                 |          |                               |          |                    |               |            |               |                     |               |            |               |
| Latency to first visit [s]                          | 52.5 ± 68.0                     | 11       | 23.7 ± 15.0                   | 11       | 40.4 ± 52.3                     | 15       | 39.2 ± 44.6                   | 16       | U                  | 0.7969        | U          | 0.8384        | U                   | 0.7160        | U          | 0.9224        |
| Visits [#] - total                                  | 16.9 ± 8.0                      | 11       | 26.9 ± 14.1                   | 11       | 14.0 ± 7.5                      | 15       | 17.0 ± 6.7                    | 16       | t                  | 0.0581        | t          | 0.3598        | t                   | <b>0.0491</b> | t          | 0.2509        |
| Visits [#] - most consecutive                       | 1.5 ± 0.9                       | 11       | 2.5 ± 1.4                     | 11       | 1.7 ± 1.2                       | 15       | 1.7 ± 0.9                     | 16       | U                  | 0.0688        | U          | 0.6225        | U                   | 0.0774        | U          | 0.9376        |
| Visits [#] - total revisits                         | 3.8 ± 3.0                       | 11       | 7.3 ± 5.9                     | 11       | 4.2 ± 3.9                       | 15       | 3.9 ± 2.2                     | 16       | U                  | 0.1171        | U          | 0.7821        | U                   | 0.0993        | t          | 0.7807        |
| Visits (%) - rigorous revisits                      | 28.5 ± 13.1                     | 11       | 32.7 ± 12.4                   | 11       | 15.9 ± 11.4                     | 15       | 27.8 ± 12.9                   | 16       | t                  | 0.4509        | t          | <b>0.0180</b> | t                   | 0.3290        | t          | <b>0.0104</b> |
| Visits (%) - rigorous revisits                      |                                 |          |                               |          | 2way ANOVA                      |          |                               |          | Genotype: p=0.0148 |               |            |               | Treatment: p=0.0139 |               |            |               |
| <b>Y-Maze</b>                                       |                                 |          |                               |          |                                 |          |                               |          |                    |               |            |               |                     |               |            |               |
| Entries [#] - total                                 | 13.5 ± 7.0                      | 13       | 19.9 ± 4.2                    | 14       | 11.8 ± 5.1                      | 15       | 11.7 ± 3.0                    | 16       | t                  | <b>0.0109</b> | t          | 0.4661        | t                   | <0.0001       | t          | 0.9415        |
| Entries [#] - alternating                           | 9.3 ± 4.5                       | 13       | 12.9 ± 3.5                    | 14       | 6.7 ± 3.6                       | 15       | 7.6 ± 1.7                     | 16       | t                  | <b>0.0362</b> | t          | 0.1227        | t                   | <0.0001       | t          | 0.3583        |
| Entries [#] - non-alternating                       | 4.4 ± 2.8                       | 13       | 6.0 ± 2.9                     | 14       | 4.1 ± 2.2                       | 15       | 3.1 ± 2.3                     | 16       | U                  | 0.1691        | U          | 0.8911        | t                   | <b>0.0056</b> | U          | 0.2859        |
| Entries [#] - alternating vs non-alternating        | U                               | p=0.0224 | t                             | p<0.0001 | t                               | p=0.0227 | t                             | p<0.0001 |                    |               |            |               |                     |               |            |               |
| Entries (%) - Δ alternating vs non-alternating      | 28.5 ± 42.7                     | 13       | 37.2 ± 28.4                   | 14       | 17.2 ± 37.7                     | 15       | 47.6 ± 30.7                   | 16       | U                  | 0.8496        | U          | 0.1555        | t                   | 0.3411        | U          | <b>0.0146</b> |
| Entries (%) - Δ alternating vs non-alternating      |                                 |          |                               |          | 2way ANOVA                      |          |                               |          | Genotype: p=0.9820 |               |            |               | Treatment: p=0.0314 |               |            |               |
| Centralization Index - 0-100s                       | 1.002 ± 0.0017                  | 130      | 1.002 ± 0.0012                | 140      | 1.002 ± 0.0017                  | 150      | 1.001 ± 0.0011                | 160      | U                  | 0.1615        | U          | 0.1595        | U                   | <0.0001       | U          | <0.0001       |
| Centralization Index - 100-200s                     | 1.000 ± 0.0018                  | 130      | 1.001 ± 0.0012                | 140      | 1.001 ± 0.0022                  | 150      | 1.000 ± 0.0013                | 160      | U                  | <b>0.0039</b> | U          | 0.8736        | U                   | <0.0001       | U          | 0.2401        |
| Centralization Index - 200-300s                     | 1.001 ± 0.0013                  | 130      | 1.001 ± 0.0015                | 140      | 1.001 ± 0.0016                  | 150      | 1.001 ± 0.0012                | 160      | U                  | <b>0.0023</b> | U          | <b>0.0071</b> | U                   | <0.0001       | U          | <b>0.0004</b> |
| Centralization Index - 0-300s                       |                                 |          |                               |          | Three-way ANOVA                 |          |                               |          | Time: p<0.0001     |               |            |               | Treatment: p=0.9158 |               |            |               |
|                                                     |                                 |          |                               |          |                                 |          |                               |          | Genotype: p=0.3957 |               |            |               |                     |               |            |               |
| <b>Social Interaction in Pairs</b>                  |                                 |          |                               |          |                                 |          |                               |          |                    |               |            |               |                     |               |            |               |
| Track length total [m]                              | 33.3 ± 3.7                      | 10       | 31.1 ± 2.9                    | 12       | 38.2 ± 3.8                      | 10       | 42.3 ± 4.3                    | 14       | U                  | 0.7223        | U          | <b>0.0089</b> | U                   | <0.0001       | U          | <b>0.0358</b> |
| Distance nose-nose [cm] - avg over full time (10s)  |                                 |          |                               |          | Three-way ANOVA                 |          |                               |          | Time: p=0.3097     |               |            |               | Treatment: p=0.1575 |               |            |               |
|                                                     |                                 |          |                               |          |                                 |          |                               |          | Genotype: p=0.2851 |               |            |               |                     |               |            |               |
| Distance nose-nose [cm] - total avg                 | 16.83 ± 0.97                    | 5        | 16.68 ± 0.94                  | 6        | 16.93 ± 2.05                    | 5        | 15.50 ± 0.74                  | 7        | t                  | 0.8048        | t          | 0.9274        | t                   | <b>0.0336</b> | t          | 0.2006        |
| Distance nose-nose [cm] - avg over 1 minute (2s)    |                                 |          |                               |          | Three-way ANOVA                 |          |                               |          | Time: p=0.4573     |               |            |               | Treatment: p=0.4423 |               |            |               |
|                                                     |                                 |          |                               |          |                                 |          |                               |          | Genotype: p=0.0562 |               |            |               |                     |               |            |               |
| Distance nose-nose [cm] - 1 minute avg              | 17.7 ± 1.4                      | 5        | 17.5 ± 1.9                    | 6        | 16.7 ± 2.1                      | 5        | 15.7 ± 1.0                    | 7        | t                  | 0.9010        | t          | 0.4017        | t                   | 0.0804        | t          | 0.3868        |
| Distance nose-nose [cm] - avg over 3 minutes (10s)  |                                 |          |                               |          | Three-way ANOVA                 |          |                               |          | Time: p=0.6036     |               |            |               | Treatment: p=0.182  |               |            |               |
|                                                     |                                 |          |                               |          |                                 |          |                               |          | Genotype: p=0.2542 |               |            |               |                     |               |            |               |
| Distance nose-nose [cm] - 1 minute avg              | 17.3 ± 1.1                      | 5        | 17.2 ± 1.5                    | 6        | 17.3 ± 2.1                      | 5        | 15.7 ± 1.0                    | 7        | t                  | 0.8863        | t          | >0.9999       | U                   | 0.1807        | U          | 0.2677        |
| <b>Three Chamber Sociability Test</b>               |                                 |          |                               |          |                                 |          |                               |          |                    |               |            |               |                     |               |            |               |
| Social preference (SP) - overall distance [cm]      | 4105.0 ± 408.1                  | 13       | 3698.0 ± 557.9                | 14       | 4433.0 ± 1056.0                 | 15       | 5057.0 ± 851.4                | 16       | t                  | <b>0.0399</b> | t          | 0.2815        | t                   | <0.0001       | t          | 0.0819        |
| SP - zone crossings [#]                             | 566.8 ± 57.3                    | 13       | 536.3 ± 61.8                  | 14       | 635.1 ± 125.5                   | 15       | 682.8 ± 105.6                 | 16       | t                  | 0.1954        | t          | 0.0727        | t                   | <0.0001       | t          | 0.2646        |
| SP - time in stimulus chamber [s]                   | 113.3 ± 28.8                    | 13       | 109.0 ± 18.7                  | 14       | 113.7 ± 51.2                    | 15       | 137.7 ± 43.5                  | 16       | t                  | 0.6522        | U          | 0.4130        | t                   | <b>0.0262</b> | U          | 0.2995        |
| SP - time in empty chamber [s]                      | 77.3 ± 14.5                     | 13       | 73.0 ± 18.2                   | 14       | 98.7 ± 41.6                     | 15       | 101.4 ± 24.8                  | 16       | t                  | 0.4998        | U          | 0.1077        | t                   | <b>0.0012</b> | U          | 0.5196        |
| SP - time in stimulus vs empty chamber [s]          | t                               | p=0.0008 | t                             | p<0.0001 | t                               | p=0.1261 | t                             | p=0.0080 |                    |               |            |               |                     |               |            |               |
| SP - track length in stimulus chamber [cm]          | 1002.0 ± 208.4                  | 13       | 877.0 ± 160.6                 | 14       | 947.0 ± 499.5                   | 15       | 1160.0 ± 410.7                | 16       | t                  | 0.0962        | U          | 0.7168        | t                   | <b>0.0192</b> | U          | 0.3183        |
| SP - track length in empty chamber [cm]             | 845.5 ± 167.2                   | 13       | 750.6 ± 172.7                 | 14       | 1055.0 ± 348.4                  | 15       | 1180.0 ± 292.1                | 16       | t                  | 0.1596        | t          | 0.0511        | t                   | <0.0001       | t          | 0.2898        |
| SP - track length in stimulus vs empty chamber [cm] | t                               | p=0.0458 | t                             | p=0.0555 | t                               | p=0.9999 | t                             | p=0.8768 |                    |               |            |               |                     |               |            |               |
| SP - visits to stimulus chamber [#]                 | 45.2 ± 9.2                      | 13       | 39.7 ± 8.4                    | 14       | 49.2 ± 27.0                     | 15       | 48.8 ± 16.2                   | 16       | t                  | 0.1218        | t          | 0.5920        | t                   | 0.0615        | t          | 0.9620        |
| SP - visits to empty chamber [#]                    | 31.7 ± 8.1                      | 13       | 27.0 ± 8.0                    | 14       | 45.1 ± 18.5                     | 15       | 46.7 ± 13.0                   | 16       | t                  | 0.1432        | t          | <b>0.0198</b> | t                   | <0.0001       | t          | 0.7815        |
| SP - visits to stimulus vs empty chamber [#]        | t                               | p=0.0006 | t                             | p=0.0004 | t                               | p=0.6288 | t                             | p=0.6856 |                    |               |            |               |                     |               |            |               |
| SP - latency to stimulus chamber [s]                | 35.6 ± 47.2                     | 13       | 29.4 ± 38.6                   | 14       | 20.6 ± 26.7                     | 15       | 33.4 ± 42.2                   | 16       | U                  | 0.7658        | U          | 0.3874        | U                   | 0.7364        | U          | 0.5453        |
| SP - latency to empty chamber [s]                   | 75.2 ± 64.3                     | 13       | 129.2 ± 123.5                 | 14       | 88.3 ± 75.7                     | 15       | 53.4 ± 50.4                   | 16       | t                  | 0.1651        | t          | 0.6241        | U                   | 0.1417        | U          | 0.2164        |
| SP - latency to stimulus vs empty chamber [s]       | U                               | p=0.1254 | U                             | p=0.0122 | U                               | p=0.0014 | U                             | p=0.1713 |                    |               |            |               |                     |               |            |               |
| SP - time with stimulus insert [s]                  | 205.2 ± 35.7                    | 13       | 230.2 ± 52.1                  | 14       | 151.9 ± 86.7                    | 15       | 126.6 ± 55.1                  | 16       | t                  | 0.1565        | U          | 0.0957        | t                   | <0.0001       | U          | 0.2129        |
| SP - time with empty insert [s]                     | 131.3 ± 44.0                    | 13       | 110.7 ± 39.3                  | 14       | 128.0 ± 98.1                    | 15       | 94.8 ± 45.1                   | 16       | t                  | 0.2136        | U          | 0.1696        | t                   | 0.3088        | U          | 0.4701        |
| SP - time with stimulus vs empty insert [s]         | t                               | p<0.0001 | t                             | p<0.0001 | t                               | p=0.1045 | t                             | p=0.0844 |                    |               |            |               |                     |               |            |               |
| SP - visits to stimulus insert [#]                  | 30.9 ± 5.6                      | 13       | 27.7 ± 7.6                    | 14       | 33.7 ± 19.9                     | 15       | 26.8 ± 11.3                   | 16       | t                  | 0.2353        | U          | 0.1045        | t                   | 0.7978        | U          | 0.1317        |
| SP - visits to empty insert [#]                     | 20.9 ± 6.5                      | 13       | 17.6 ± 4.5                    | 14       | 28.1 ± 13.0                     | 15       | 25.9 ± 9.8                    | 16       | t                  | 0.1527        | t          | 0.0716        | t                   | <b>0.0063</b> | t          | 0.6020        |
| SP - visits to stimulus vs empty insert [#]         | t                               | p=0.0003 | t                             | p=0.0004 | t                               | p=0.1133 | t                             | p=0.8035 |                    |               |            |               |                     |               |            |               |
| SP - latency to stimulus insert [s]                 | 50.3 ± 49.0                     | 13       | 51.0 ± 51.0                   | 14       | 43.8 ± 54.1                     | 15       | 59.9 ± 59.0                   | 16       | U                  | 0.9810        | U          | 0.7757        | U                   | 0.7587        | U          | 0.4400        |
| SP - latency to empty insert [s]                    | 80.8 ± 64.3                     | 13       | 141.9 ± 118.6                 | 14       | 92.9 ± 74.5                     | 15       | 58.3 ± 50.4                   | 16       | t                  | 0.1083        | t          | 0.6487        | t                   | <b>0.0254</b> | t          | 0.1459        |
| SP - latency to stimulus vs empty insert [s]        | U                               |          |                               |          |                                 |          |                               |          |                    |               |            |               |                     |               |            |               |

|                                                        |                 |    |                 |    |                 |    |                 |    |                    |           |           |                                                                                  |
|--------------------------------------------------------|-----------------|----|-----------------|----|-----------------|----|-----------------|----|--------------------|-----------|-----------|----------------------------------------------------------------------------------|
| Circling - events clockwise [#]                        | 505.6 ± 216.2   | 13 | 498.9 ± 238.8   | 14 | 484.3 ± 216.4   | 15 | 486.1 ± 181.5   | 16 | t 0.9397           | t 0.7972  | t 0.8715  | t 0.9803                                                                         |
| Circling - events counterclockwise [#]                 | 509.4 ± 172.1   | 13 | 500.6 ± 232.5   | 14 | 551.8 ± 325.8   | 15 | 491.0 ± 173.1   | 16 | t 0.9121           | U 0.9375  | t 0.8997  | U 0.8529                                                                         |
| Circling - total events [#]                            | 1015.0 ± 374.6  | 13 | 999.6 ± 460.4   | 14 | 1036.0 ± 532.5  | 15 | 977.1 ± 345.1   | 16 | t 0.9244           | t 0.9034  | t 0.8825  | t 0.7194                                                                         |
| Circling - average duration [s]                        | 3.6 ± 0.1       | 13 | 3.6 ± 0.2       | 14 | 3.7 ± 0.2       | 15 | 3.7 ± 0.1       | 16 | t 0.2496           | t 0.3818  | t 0.0950  | t 0.8358                                                                         |
| Circling - average duration [s] pooled by genotype     |                 |    |                 |    | U p=0.0781      |    |                 |    |                    |           |           |                                                                                  |
| Circling - average perimeter [mm]                      | 165.5 ± 25.9    | 13 | 163.9 ± 18.7    | 14 | 172.0 ± 26.1    | 15 | 177.5 ± 16.3    | 16 | U 0.5502           | U 0.3162  | U 0.0079  | U 0.2020                                                                         |
| Circling - average velocity [mm/s]                     | 52.1 ± 7.2      | 13 | 52.7 ± 4.0      | 14 | 53.7 ± 10.3     | 15 | 55.0 ± 6.3      | 16 | t 0.7970           | U 0.8207  | t 0.2316  | U 0.2164                                                                         |
| <b>Vocalization</b>                                    |                 |    |                 |    |                 |    |                 |    |                    |           |           |                                                                                  |
| Latency to first call [s]                              | 50.2 ± 65.5     | 13 | 18.0 ± 10.3     | 14 | 96.3 ± 81.4     | 15 | 57.2 ± 63.0     | 16 | U 0.2435           | U 0.0689  | U 0.0018  | U 0.3650                                                                         |
| Latency to first call [s]                              |                 |    |                 |    | 2way ANOVA      |    |                 |    | Genotype: p=0.0106 |           |           | Treatment: p=0.0295                                                              |
| Number of calls [#]                                    | 420.2 ± 346.7   | 13 | 606.4 ± 219.0   | 14 | 56.8 ± 98.9     | 15 | 76.7 ± 124.9    | 16 | t 0.1139           | U 0.0028  | U <0.0001 | U 0.2948                                                                         |
| Number of calls [#]                                    |                 |    |                 |    | 2way ANOVA      |    |                 |    | Genotype: p<0.0001 |           |           | Treatment: p=0.0904                                                              |
| Duration of calling [s]                                | 1305.0 ± 12.5   | 13 | 17.6 ± 8.4      | 14 | 1.3 ± 2.5       | 15 | 1.7 ± 2.6       | 16 | t 0.2876           | U 0.0032  | U <0.0001 | U 0.2948                                                                         |
| Duration of calling [s]                                |                 |    |                 |    | 2way ANOVA      |    |                 |    | Genotype: p<0.0001 |           |           | Treatment: p=0.2444                                                              |
| <b>Prepulse Inhibition (PPI)</b>                       |                 |    |                 |    |                 |    |                 |    |                    |           |           |                                                                                  |
| Hearing - 65 dB [AU]                                   | 0.6 ± 0.2       | 10 | 1.8 ± 1.7       | 9  | 1.0 ± 0.8       | 9  | 0.5 ± 0.2       | 9  | U 0.1500           | U 0.3050  | U 0.0150  | U 0.0152                                                                         |
| Hearing - 120 dB [AU]                                  | 7.8 ± 4.5       | 10 | 4.8 ± 2.3       | 9  | 6.1 ± 4.2       | 9  | 4.4 ± 4.2       | 9  | t 0.0911           | t 0.4061  | U 0.3865  | U 0.1903                                                                         |
| Hearing - 65 dB vs 120 dB                              |                 |    |                 |    | t p=0.0008      |    |                 |    | U p=0.0106         |           |           | U p=0.0002                                                                       |
| PPI - 70dB [%]                                         | 29.3 ± 10.6     | 10 | 17.6 ± 13.3     | 9  | 38.5 ± 9.0      | 9  | 34.1 ± 17.2     | 9  | t 0.0527           | t 0.0551  | t 0.0375  | t 0.5090                                                                         |
| PPI - 75dB [%]                                         | 39.2 ± 18.5     | 10 | 35.5 ± 15.0     | 9  | 57.0 ± 17.0     | 9  | 56.2 ± 11.8     | 9  | t 0.6390           | t 0.0431  | t 0.0054  | t 0.9108                                                                         |
| PPI - 80dB [%]                                         | 55.8 ± 16.3     | 10 | 51.0 ± 17.7     | 9  | 57.0 ± 20.9     | 9  | 57.9 ± 13.5     | 9  | t 0.5502           | t 0.8850  | t 0.3670  | t 0.9204                                                                         |
| PPI one-way/2way ANOVA sound intensity                 |                 |    |                 |    | 0.0026          |    |                 |    | 0.0005             |           |           | 0.0362                                                                           |
| PPI one-way/2way ANOVA sound intensity                 |                 |    |                 |    |                 |    |                 |    | 0.0026             |           |           | 2wA 0.1079 2wA 0.0298 2wA 0.0007 2wA 0.7319                                      |
|                                                        |                 |    |                 |    |                 |    |                 |    |                    |           |           | Three-way ANOVA Sound Intensity: p<0.0001 Treatment: p=0.3300 Genotype: p=0.0061 |
| <b>Morris Water Maze</b>                               |                 |    |                 |    |                 |    |                 |    |                    |           |           |                                                                                  |
| Visible 1 - escape latency [s]                         | 22.8 ± 12.0     | 13 | 21.6 ± 16.50    | 14 | 21.0 ± 9.7      | 15 | 25.0 ± 14.8     | 16 | U 0.3022           | U 0.8919  | U 0.1794  | U 0.3791                                                                         |
| Visible 2 - escape latency [s]                         | 7.4 ± 4.1       | 13 | 7.9 ± 4.40      | 14 | 7.6 ± 4.9       | 15 | 7.4 ± 4.4       | 16 | U 0.6500           | U 0.9639  | U 0.9510  | U 0.9224                                                                         |
| Visible 1 vs 2 - escape latency [s]                    |                 |    |                 |    | U p<0.0001      |    |                 |    | U p=0.0004         |           |           | U p<0.0001                                                                       |
| Visible 1 - track length [cm]                          | 370.5 ± 153.9   | 13 | 360.3 ± 206.9   | 14 | 412.0 ± 165.5   | 15 | 529.0 ± 300.7   | 16 | U 0.5502           | t 0.4989  | U 0.0275  | U 0.2020                                                                         |
| Visible 2 - track length [cm]                          | 140.9 ± 72.1    | 13 | 135.3 ± 63.6    | 14 | 172.0 ± 103.8   | 15 | 179.0 ± 99.5    | 16 | t 0.8336           | U 0.5250  | U 0.1661  | U 0.6260                                                                         |
| Visible 1 vs 2 - track length [cm]                     |                 |    |                 |    | t p=0.0001      |    |                 |    | U p=0.0001         |           |           | U p<0.0001                                                                       |
| Visible 1 - velocity [cm/s]                            | 17.7 ± 3.5      | 13 | 18.4 ± 3.0      | 14 | 21.3 ± 2.6      | 15 | 22.2 ± 2.4      | 16 | t 0.5747           | t 0.0049  | t 0.0008  | t 0.3442                                                                         |
| Visible 2 - velocity [cm/s]                            | 20.8 ± 4.0      | 13 | 19.8 ± 4.0      | 14 | 24.2 ± 4.1      | 15 | 26.1 ± 3.3      | 16 | t 0.5319           | t 0.0364  | t <0.0001 | t 0.1568                                                                         |
| Visible 1 vs 2 - velocity [cm/s]                       |                 |    |                 |    | t p=0.0422      |    |                 |    | U p=0.2874         |           |           | t p=0.0324                                                                       |
| Hidden 1 - escape latency [s]                          | 52.3 ± 21.4     | 13 | 44.6 ± 22.1     | 14 | 51.1 ± 15.6     | 15 | 54.2 ± 21.2     | 16 | t 0.3664           | t 0.8628  | t 0.2360  | t 0.6369                                                                         |
| Hidden 2 - escape latency [s]                          | 41.1 ± 25.9     | 13 | 27.9 ± 21.5     | 14 | 46.5 ± 20.6     | 15 | 43.9 ± 19.7     | 16 | U 0.0945           | t 0.5472  | U 0.0218  | t 0.6823                                                                         |
| Hidden 3 - escape latency [s]                          | 34.9 ± 22.1     | 13 | 29.8 ± 14.9     | 14 | 35.2 ± 20.4     | 15 | 35.2 ± 16.9     | 16 | t 0.4901           | t 0.9732  | t 0.3613  | t 0.9992                                                                         |
| Hidden 4 - escape latency [s]                          | 26.8 ± 13.8     | 13 | 27.9 ± 14.9     | 14 | 27.4 ± 19.4     | 15 | 29.8 ± 20.1     | 16 | U 0.7203           | U 0.4956  | U 0.7901  | U 0.6539                                                                         |
| Hidden 5 - escape latency [s]                          | 16.3 ± 9.2      | 13 | 29.0 ± 17.2     | 14 | 27.4 ± 20.7     | 15 | 26.3 ± 14.5     | 16 | U 0.0683           | U 0.1300  | U 0.7277  | U 0.8304                                                                         |
| Hidden 6 - escape latency [s]                          | 17.8 ± 6.2      | 13 | 15.4 ± 9.1      | 14 | 21.8 ± 14.0     | 15 | 25.6 ± 14.2     | 16 | t 0.4325           | t 0.3328  | t 0.0254  | t 0.4537                                                                         |
| Hidden 7 - escape latency [s]                          | 19.1 ± 10.6     | 13 | 14.7 ± 8.6      | 14 | 17.0 ± 11.6     | 15 | 20.7 ± 16.7     | 16 | U 0.2020           | U 0.4130  | U 0.3134  | U 0.5717                                                                         |
| Hidden 8 - escape latency [s]                          | 13.8 ± 6.5      | 13 | 10.8 ± 3.0      | 14 | 22.1 ± 13.6     | 15 | 20.2 ± 15.8     | 16 | t 0.1533           | t 0.0457  | U 0.0925  | U 0.3846                                                                         |
| Hidden 1-8 - escape latency over time                  |                 |    |                 |    | Three-way ANOVA |    |                 |    | Time: p<0.0001     |           |           | Treatment: p=0.7100                                                              |
| Probe Trial 1 (PT) - time in target quadrant (TQ) [s]  | 45.6 ± 9.4      | 13 | 39.9 ± 10.1     | 14 | 28.5 ± 7.1      | 15 | 24.9 ± 7.7      | 16 | t 0.1445           | t <0.0001 | t 0.0001  | t 0.1886                                                                         |
| Probe Trial 1 (PT) - time in target quadrant (TQ) [s]  |                 |    |                 |    | 2way ANOVA      |    |                 |    | Genotype: p<0.0001 |           |           | Treatment: p=0.0747                                                              |
| PT 1 - visits to TQ [#]                                | 16.8 ± 3.7      | 13 | 16.5 ± 3.3      | 14 | 13.9 ± 2.7      | 15 | 12.3 ± 3.5      | 16 | t 0.8419           | U 0.0402  | t 0.0022  | U 0.1877                                                                         |
| PT 1 - latency to former escape platform [s]           | 15.9 ± 10.7     | 13 | 21.1 ± 12.7     | 14 | 19.9 ± 12.6     | 15 | 27.9 ± 23.4     | 16 | U 0.3022           | U 0.3389  | U 0.6886  | t 0.2426                                                                         |
| PT 1 - visits to former escape platform [#]            | 5.0 ± 2.0       | 13 | 4.6 ± 2.3       | 14 | 3.7 ± 1.5       | 15 | 2.8 ± 1.9       | 16 | t 0.6069           | U 0.0416  | t 0.0330  | U 0.1667                                                                         |
| PT 1 - total track length [cm]                         | 1775.0 ± 270.2  | 13 | 1847.0 ± 167.6  | 14 | 2058.0 ± 231.0  | 15 | 2089.0 ± 103.2  | 16 | U 0.7203           | t 0.0070  | U <0.0001 | t 0.6354                                                                         |
| PT 1 - total track length [cm]                         |                 |    |                 |    | 2way ANOVA      |    |                 |    | Genotype: p<0.0001 |           |           | Treatment: p=0.3388                                                              |
| Reversal 1 - escape latency [s]                        | 25.4 ± 18.3     | 13 | 23.3 ± 8.9      | 14 | 26.7 ± 16.3     | 15 | 33.3 ± 17.6     | 16 | U 0.7930           | U 0.6501  | t 0.0576  | U 0.2995                                                                         |
| Reversal 2 - escape latency [s]                        | 22.1 ± 17.1     | 13 | 14.4 ± 12.1     | 14 | 23.2 ± 16.2     | 15 | 23.0 ± 14.1     | 16 | U 0.2588           | U 0.7605  | U 0.1103  | U 0.8916                                                                         |
| Reversal 3 - escape latency [s]                        | 14.2 ± 10.9     | 13 | 16.4 ± 12.2     | 14 | 28.5 ± 26.3     | 15 | 20.6 ± 13.4     | 16 | U 0.9051           | U 0.0464  | U 0.1934  | U 0.7112                                                                         |
| Reversal 4 - escape latency [s]                        | 11.4 ± 6.4      | 13 | 12.9 ± 9.2      | 14 | 19.4 ± 13.5     | 15 | 19.8 ± 11.0     | 16 | U >0.9999          | U 0.0581  | U 0.0245  | U 0.7405                                                                         |
| Reversal 1-4 - escape latency over time // Gen./Treat. |                 |    |                 |    | p=0.0476        |    |                 |    | p=0.0265           |           |           | p=0.5629                                                                         |
| Reversal 1-4 - escape latency over time                |                 |    |                 |    |                 |    |                 |    | p=0.0339           |           |           | 2wA 0.5294 2wA 0.1676 2wA 0.0044 2wA 0.9425                                      |
| Probe Trial 2 (PT) - time in target quadrant (TQ) [s]  | 34.4 ± 5.5      | 13 | 38.5 ± 7.1      | 14 | 28.3 ± 6.1      | 15 | 28.7 ± 7.2      | 16 | t 0.1036           | t 0.0105  | t 0.0008  | t 0.8792                                                                         |
| Probe Trial 2 (PT) - time in target quadrant (TQ) [s]  |                 |    |                 |    | 2way ANOVA      |    |                 |    | Genotype: p<0.0001 |           |           | Treatment: p=0.2260                                                              |
| PT 2 - visits to TQ [#]                                | 18.5 ± 3.8      | 13 | 18.1 ± 3.7      | 14 | 14.3 ± 3.3      | 15 | 12.8 ± 3.2      | 16 | t 0.8262           | t 0.0054  | U 0.0005  | U 0.1390                                                                         |
| PT 2 - latency to former escape platform [s]           | 10.2 ± 11.3     | 13 | 11.0 ± 18.5     | 14 | 18.3 ± 17.7     | 15 | 15.3 ± 13.3     | 16 | U 0.9430           | U 0.1452  | U 0.0701  | U 0.6618                                                                         |
| PT 2 - visits to former escape platform [#]            | 5.2 ± 2.9       | 13 | 5.5 ± 2.3       | 14 | 3.5 ± 1.6       | 15 | 2.3 ± 1.3       | 16 | t 0.7337           | t 0.0769  | t 0.0002  | t 0.0368                                                                         |
| PT 2 - total track length [cm]                         | 1854.0 ± 282.7  | 13 | 1841.0 ± 146.3  | 14 | 2114.0 ± 193.0  | 15 | 2083.0 ± 158.4  | 16 | t 0.8869           | t 0.0108  | t 0.0002  | t 0.6313                                                                         |
| PT 2 - total track length [cm]                         |                 |    |                 |    | 2way ANOVA      |    |                 |    | Genotype: p<0.0001 |           |           | Treatment: p=0.6671                                                              |
| <b>Complex Wheel Running</b>                           |                 |    |                 |    |                 |    |                 |    |                    |           |           |                                                                                  |
| Distance [m] - over time                               |                 |    |                 |    | Three-way ANOVA |    |                 |    | Time: p=0.0031     |           |           | Treatment: p=0.5696                                                              |
| Distance [m] - total                                   | 911.1 ± 602.53  | 6  | 806.1 ± 211.69  | 5  | 1614.7 ± 167.35 | 6  | 1511.8 ± 480.3  | 8  | t 0.7033           | t 0.0344  | t 0.0044  | t 0.5876                                                                         |
| Distance [m] - total                                   | 69.48 ± 40.7    | 6  | 66.13 ± 17.78   | 5  | 117 ± 12.02     | 6  | 102.9 ± 31.05   | 8  | t 0.8606           | t 0.0343  | t 0.0202  | t 0.2684                                                                         |
| Velocity [m/s] - average                               | 0.210 ± 0.029   | 6  | 0.205 ± 0.018   | 5  | 0.243 ± 0.021   | 6  | 0.257 ± 0.021   | 8  | t 0.7140           | t 0.0496  | t 0.0007  | t 0.2334                                                                         |
| <b>Magnet Resonance Tomography</b>                     |                 |    |                 |    |                 |    |                 |    |                    |           |           |                                                                                  |
| Olfactory bulb - volume [mm3]                          | 27.12 ± 1.086   | 7  | 26.76 ± 0.314   | 8  | 26.63 ± 0.405   | 7  | 26.55 ± 0.744   | 8  | t 0.4266           | t 0.2971  | t 0.4781  | t 0.7973                                                                         |
| Thalamus - volume [mm3]                                | 17.04 ± 0.909   | 7  | 16.61 ± 0.360   | 8  | 17.16 ± 0.789   | 7  | 17.35 ± 0.902   | 8  | t 0.2757           | t 0.7953  | U 0.083   | U 0.3357                                                                         |
| Hippocampus - volume [mm3]                             | 65.04 ± 2.909   | 7  | 63.81 ± 1.632   | 8  | 68.8 ± 1.308    | 7  | 68.84 ± 2.469   | 8  | t 0.3470           | t 0.0136  | t 0.0004  | t 0.9664                                                                         |
| Hippocampus - volume [mm3]                             |                 |    |                 |    | 2way ANOVA      |    |                 |    | Genotype: p<0.0001 |           |           | Treatment: p=0.4580                                                              |
| Corpus Callosum - volume [mm3]                         | 1.15 ± 0.068    | 7  | 1.126 ± 0.037   | 8  | 1.144 ± 0.080   | 7  | 1.183 ± 0.054   | 7  | t 0.4327           | t 0.8912  | t 0.0413  | t 0.3145                                                                         |
| Ventricles - volume [mm3]                              | 10.4 ± 1.505    | 7  | 9.719 ± 0.896   | 8  | 10.67 ± 0.926   | 7  | 10.52 ± 1.044   | 8  | t 0.3205           | t 0.6965  | t 0.1224  | t 0.7734                                                                         |
| Cerebellum - volume [mm3]                              | 54.32 ± 2.589   | 7  | 53.36 ± 1.817   | 8  | 56.68 ± 2.239   | 7  | 57.01 ± 1.18    | 8  | t 0.4293           | t 0.0936  | t 0.0005  | t 0.7345                                                                         |
| Cerebellum - volume [mm3]                              |                 |    |                 |    | 2way ANOVA      |    |                 |    | Genotype: p=0.0003 |           |           | Treatment: p=0.6670                                                              |
| Brain matter - volume [mm3]                            | 494.5 ± 20.0    | 7  | 483.1 ± 10.53   | 8  | 511.8 ± 12.81   | 7  | 512.9 ± 8.849   | 8  | t 0.2104           | t 0.0812  | t <0.0001 | t 0.8507                                                                         |
| Brain matter - volume [mm3]                            |                 |    |                 |    | 2way ANOVA      |    |                 |    | Genotype: p<0.0001 |           |           | Treatment: p=0.3117                                                              |
| Brain - volume [mm3]                                   | 504.9 ± 20.28   | 7  | 492.8 ± 10.67   | 8  | 522.5 ± 13.33   | 7  | 523.5 ± 8.882   | 8  | t 0.1923           | t 0.0825  | t <0.0001 | t 0.8744                                                                         |
| Brain - volume [mm3]                                   |                 |    |                 |    | 2way ANOVA      |    |                 |    | Genotype: p<0.0001 |           |           | Treatment: p=0.2841                                                              |
| <b>Organ Collection</b>                                |                 |    |                 |    |                 |    |                 |    |                    |           |           |                                                                                  |
| Body weight [g]                                        | 29.43 ± 1.27    | 7  | 28.75 ± 1.83    | 8  | 31.50 ± 1.69    | 8  | 31.00 ± 1.20    | 8  | t 0.4162           | U 0.0252  | U 0.0093  | U 0.4915                                                                         |
| Tibia length [mm]                                      | 17.78 ± 0.76    | 7  | 17.18 ± 2.13    | 8  | 18.79 ± 0.45    | 8  | 19.22 ± 0.53    | 8  | U >0.9999          | U 0.0081  | U 0.0003  | U 0.0605                                                                         |
| Brain - weight [g]                                     | 0.4406 ± 0.0125 | 7  | 0.4400 ± 0.0130 | 8  | 0.4615 ± 0.0206 | 8  | 0.4568 ± 0.0174 | 8  | t 0.9240           | t 0.0337  | t 0.0474  | t 0.6290                                                                         |
| Brain - weight [g]                                     |                 |    |                 |    | 2way ANOVA      |    |                 |    | Genotype: p=0.0030 |           |           | Treatment: p=0.6387                                                              |
| Brain - dry weight [g]                                 | 0.0938 ± 0.0031 | 7  | 0.0937 ± 0.0034 | 8  | 0.0985 ± 0.0030 | 8  | 0.0977 ± 0.0046 | 8  | t 0.9434           | t 0.0096  | t 0.0699  | t 0.6582                                                                         |
| Brain - dry weight [g]                                 |                 |    |                 |    | 2way ANOVA      |    |                 |    | Genotype: p=0.0018 |           |           | Treatment: p=0.6900                                                              |
| Brain - water content [g]                              | 0.3469 ± 0.0097 | 7  | 0.3464 ± 0.0100 | 8  | 0.3630 ± 0.0189 | 8  | 0.3592 ± 0.0131 | 8  | t 0.9199           | t 0.0583  | t 0.0462  | t 0.6450                                                                         |
| Brain - water content [g]                              |                 |    |                 |    | 2way ANOVA      |    |                 |    | Genotype: p=0.0055 |           |           | Treatment: p=0.6446                                                              |
| Brain - weight [g]/Body weight [g]                     | 0.0150 ± 0.0004 | 7  | 0.0154 ± 0.0011 | 8  | 0.0147 ± 0.0011 | 8  | 0.0148 ± 0.0008 | 8  | t 0.3977           | t 0.5297  | t 0.2267  | t 0.8997                                                                         |
| Brain - weight [g]/Tibia length [mm]                   | 0.0248 ± 0.0010 | 7  | 0.0261 ± 0.0043 | 8  | 0.0246 ± 0.0012 | 8  | 0.0238 ± 0.0011 | 8  | U 0.7995           | t 0.6892  | U 0.1524  | t 0.2005                                                                         |
| Heart - weight [g]                                     | 0.1598 ± 0.0217 | 7  | 0.1541 ± 0.0218 | 8  | 0.1581 ± 0.0285 | 8  | 0.1554 ± 0.0156 | 8  | t 0.6208           | t 0.8978  | t 0.8991  | t 0.8136                                                                         |
| Heart - dry                                            |                 |    |                 |    |                 |    |                 |    |                    |           |           |                                                                                  |

**2nd Cohort Males**

| <b>Neophobia</b>                                  |                                                                       |    |                |    |                |    |                |    |          |          |          |          |
|---------------------------------------------------|-----------------------------------------------------------------------|----|----------------|----|----------------|----|----------------|----|----------|----------|----------|----------|
| Track length - total [cm]                         | 2164.0 ± 175.4                                                        | 12 | 2117.0 ± 458.7 | 11 | 2610.0 ± 451.8 | 15 | 2749.0 ± 617.9 | 13 | U 0,8801 | t 0,0024 | U 0,0154 | t 0,5110 |
| Track length - total [cm]                         | 2way ANOVA Genotype: p=0.0001 Treatment: p=0.6714                     |    |                |    |                |    |                |    |          |          |          |          |
| Zone crossings - total [#]                        | 337.9 ± 30.7                                                          | 12 | 326.6 ± 68.2   | 11 | 381.4 ± 57.3   | 15 | 404.0 ± 76.9   | 13 | t 0,6226 | t 0,0193 | t 0,0160 | t 0,3932 |
| Interaction time [s] - object 1                   | 15.3 ± 4.8                                                            | 12 | 14.9 ± 5.6     | 11 | 18.0 ± 4.6     | 15 | 17.1 ± 5.1     | 13 | t 0,8414 | t 0,1526 | t 0,3397 | t 0,6066 |
| Interaction time [s] - object 2                   | 17.0 ± 3.6                                                            | 12 | 16.6 ± 6.6     | 11 | 21.3 ± 6.8     | 15 | 22.5 ± 8.4     | 13 | t 0,8659 | t 0,0437 | t 0,0659 | t 0,6930 |
| Interaction time [s] - object 1 vs object 2       | t p=0.3598                                                            |    | t p=0.5301     |    | t p=0.1322     |    | t p=0.0601     |    |          |          |          |          |
| Interaction time [s] - object 1 + object 2        | 32.3 ± 6.5                                                            | 12 | 31.5 ± 11.3    | 11 | 39.4 ± 10.3    | 15 | 39.6 ± 11.6    | 13 | t 0,8334 | t 0,0392 | U 0,1191 | U 0,5860 |
| Interaction time [s] - object 1 + object 2        | 2way ANOVA Genotype: p=0.0100 Treatment: p=0.9258                     |    |                |    |                |    |                |    |          |          |          |          |
| Visits [#] - object 1                             | 16.8 ± 6.1                                                            | 12 | 18.4 ± 5.7     | 11 | 23.9 ± 6.4     | 15 | 21.8 ± 9.0     | 13 | t 0,5188 | t 0,0071 | t 0,2755 | t 0,4930 |
| Visits [#] - object 2                             | 19.7 ± 3.9                                                            | 12 | 20.7 ± 10.6    | 11 | 24.4 ± 6.0     | 15 | 28.6 ± 8.7     | 13 | t 0,7589 | t 0,0211 | t 0,0630 | t 0,1573 |
| Visits [#] - object 1 vs object 2                 | t p=0.1779                                                            |    | t p=0.5239     |    | t p=0.8166     |    | t p=0.0608     |    |          |          |          |          |
| Visits [#] - object 1 + object 2                  | 36.4 ± 7.4                                                            | 12 | 39.1 ± 14.0    | 11 | 48.3 ± 11.7    | 15 | 50.4 ± 15.2    | 13 | t 0,5802 | t 0,0038 | t 0,0719 | t 0,6872 |
| Latency to first visit [s] - object 1             | 3.9 ± 2.3                                                             | 12 | 4.0 ± 3.5      | 11 | 4.1 ± 3.6      | 15 | 5.3 ± 4.6      | 13 | t 0,9154 | U 0,7645 | t 0,4460 | U 0,6832 |
| Latency to first visit [s] - object 2             | 3.6 ± 4.2                                                             | 12 | 4.9 ± 3.6      | 11 | 3.8 ± 2.4      | 15 | 5.2 ± 4.1      | 13 | U 0,1950 | U 0,3050 | U 0,7762 | U 0,4883 |
| Latency to first visit [s] - object 1 vs object 2 | U p=0.3114                                                            |    | t p=0.5374     |    | U p=0.9755     |    | U p=0.7623     |    |          |          |          |          |
| <b>Rotarod</b>                                    |                                                                       |    |                |    |                |    |                |    |          |          |          |          |
| Latency to fall [s] - day 1                       | 88.8 ± 26.5                                                           | 12 | 95.6 ± 53.7    | 11 | 84.3 ± 25.7    | 15 | 86.2 ± 34.3    | 13 | U 0,8677 | t 0,6561 | U 0,9219 | t 0,8723 |
| Latency to fall [s] - day 2                       | 142.9 ± 32.2                                                          | 12 | 134.6 ± 37.8   | 11 | 131.2 ± 42.0   | 15 | 118.9 ± 41.8   | 13 | t 0,5798 | t 0,4198 | t 0,3444 | t 0,4464 |
| Latency to fall [s] - day 1 vs day 2              | t p=0.0002                                                            |    | U p=0.0493     |    | t p=0.0012     |    | t p=0.0391     |    |          |          |          |          |
| <b>Grip Strength</b>                              |                                                                       |    |                |    |                |    |                |    |          |          |          |          |
| Body weight [g]                                   | 25.0 ± 1.7                                                            | 12 | 25.5 ± 1.5     | 11 | 25.2 ± 1.4     | 15 | 24.9 ± 2.4     | 13 | t 0,4668 | t 0,8477 | t 0,4359 | t 0,7304 |
| Grip strength [AU] - average                      | 94.1 ± 12.9                                                           | 12 | 88.6 ± 14.2    | 11 | 95.0 ± 14.0    | 15 | 87.3 ± 20.4    | 13 | t 0,3356 | t 0,8710 | t 0,8636 | t 0,2657 |
| Grip strength average/body weight                 | 3.8 ± 0.5                                                             | 12 | 3.5 ± 0.5      | 11 | 3.8 ± 0.5      | 15 | 3.5 ± 0.6      | 13 | t 0,1471 | t 0,9802 | U 0,6167 | U 0,5462 |
| Grip strength [AU] - max force                    | 101.3 ± 14.2                                                          | 12 | 95.8 ± 16.8    | 11 | 102.1 ± 15.6   | 15 | 94.5 ± 20.1    | 13 | t 0,4137 | t 0,8789 | t 0,8663 | t 0,2799 |
| Grip strength max force/body weight               | 4.1 ± 0.6                                                             | 12 | 3.7 ± 0.6      | 11 | 4.1 ± 0.5      | 15 | 3.8 ± 0.6      | 13 | t 0,2041 | t 0,9634 | U 0,6382 | U 0,4181 |
| <b>Marble Burying</b>                             |                                                                       |    |                |    |                |    |                |    |          |          |          |          |
| Marbles buried - total [%]                        | 46.5 ± 29.0                                                           | 12 | 39.8 ± 27.3    | 11 | 13.1 ± 15.6    | 15 | 10.9 ± 14.5    | 13 | t 0,5708 | U 0,0008 | U 0,0042 | U 0,6851 |
| Marbles buried - total [%]                        | 2way ANOVA Genotype: p<0.0001 Treatment: p=0.4906                     |    |                |    |                |    |                |    |          |          |          |          |
| Marbles buried - center [%]                       | 31.3 ± 29.9                                                           | 12 | 31.8 ± 29.2    | 11 | 7.5 ± 14.8     | 15 | 3.8 ± 9.4      | 13 | U 0,8578 | U 0,0085 | U 0,0006 | U 0,5792 |
| Marbles buried - periphery [%]                    | 54.2 ± 30.0                                                           | 12 | 43.8 ± 28.0    | 11 | 15.8 ± 17.0    | 15 | 14.4 ± 19.2    | 13 | t 0,3981 | U 0,0005 | U 0,0066 | U 0,6858 |
| <b>Sucrose Preference</b>                         |                                                                       |    |                |    |                |    |                |    |          |          |          |          |
| Sucrose Preference [%] - day 1                    | 62.1 ± 22.1                                                           | 12 | 69.2 ± 19.6    | 11 | 70.7 ± 17.4    | 15 | 78.3 ± 13.5    | 13 | t 0,2105 | U 0,3330 | t 0,4277 | U 0,2125 |
| Sucrose Preference [%] - day 2                    | 83.0 ± 6.1                                                            | 12 | 83.7 ± 5.4     | 11 | 80.6 ± 14.4    | 15 | 85.4 ± 7.7     | 13 | t 0,5350 | U 0,4739 | U 0,6833 | U 0,9903 |
| Sucrose Preference [%] - day 3                    | 84.6 ± 6.7                                                            | 12 | 81.2 ± 11.1    | 11 | 79.9 ± 9.6     | 15 | 79.2 ± 10.5    | 13 | t 0,6651 | t 0,8561 | t 0,3946 | t 0,1533 |
| Sucrose Preference [%] - over time (1way ANOVA)   | p=0.0004                                                              |    | p=0.0359       |    | p=0.1173       |    | p=0.2033       |    |          |          |          |          |
| Sucrose Preference [%] - over time (3way ANOVA)   | Three-way ANOVA Time: p<0.0001 Treatment: p=0.2274 Genotype: p=0.4323 |    |                |    |                |    |                |    |          |          |          |          |
| <b>Buried Food Test</b>                           |                                                                       |    |                |    |                |    |                |    |          |          |          |          |
| Latency to first contact [s] - buried day 1       | 84.6 ± 85.2                                                           | 12 | 76.8 ± 49.9    | 11 | 112.7 ± 96.1   | 15 | 101.8 ± 94.2   | 13 | U 0,7986 | U 0,3225 | U 0,7441 | U 0,5320 |
| Latency to first contact [s] - buried day 2       | 87.1 ± 84.7                                                           | 12 | 81.6 ± 51.5    | 11 | 115.2 ± 95.7   | 15 | 105.3 ± 94.4   | 13 | U 0,6613 | U 0,3164 | U 0,8091 | U 0,6828 |
| Latency to first contact [s] - visual control     | 6.3 ± 6.0                                                             | 12 | 4.5 ± 2.7      | 11 | 6.0 ± 5.3      | 15 | 4.0 ± 2.2      | 13 | U 0,8778 | U 0,9693 | U 0,6791 | U 0,6491 |
| <b>Tail Suspension Test</b>                       |                                                                       |    |                |    |                |    |                |    |          |          |          |          |
| Time of immobility [s] - 0-2min                   | 20.6 ± 8.9                                                            | 12 | 22.7 ± 9.1     | 11 | 23.3 ± 9.2     | 15 | 25.6 ± 11.9    | 13 | t 0,5853 | t 0,4519 | t 0,5157 | t 0,5861 |
| Time of immobility [s] - 2-4min                   | 55.7 ± 8.5                                                            | 12 | 58.1 ± 12.6    | 11 | 58.6 ± 11.5    | 15 | 58.3 ± 14.4    | 13 | t 0,6040 | t 0,4590 | t 0,9732 | t 0,9507 |
| Time of immobility [s] - 4-6min                   | 58.6 ± 10.3                                                           | 12 | 56.3 ± 8.8     | 11 | 60.2 ± 18.1    | 15 | 65.5 ± 15.6    | 13 | t 0,5674 | t 0,7821 | t 0,0866 | t 0,4122 |
| Immobility over time                              | Three-way ANOVA Time: p<0.0001 Treatment: p=0.5729 Genotype: p=0.2493 |    |                |    |                |    |                |    |          |          |          |          |
| Time of immobility [s] - 0-6min                   | 135.0 ± 17.5                                                          | 12 | 137.2 ± 22.5   | 11 | 142.1 ± 33.3   | 15 | 149.3 ± 37.2   | 13 | t 0,8008 | t 0,4823 | t 0,3354 | t 0,5948 |
| <b>Forced Swim Test</b>                           |                                                                       |    |                |    |                |    |                |    |          |          |          |          |
| Time of immobility [s] - 0-2min                   | 9.7 ± 13.7                                                            | 12 | 8.0 ± 6.5      | 11 | 6.0 ± 5.9      | 15 | 3.1 ± 2.3      | 13 | U 0,5653 | U 0,6219 | t 0,0330 | U 0,4593 |
| Time of immobility [s] - 2-4min                   | 30.9 ± 26.2                                                           | 12 | 39.3 ± 16.8    | 11 | 29.7 ± 23.7    | 15 | 27.3 ± 20.5    | 13 | t 0,3722 | t 0,9005 | t 0,1316 | t 0,7790 |
| Time of immobility [s] - 4-6min                   | 43.1 ± 31.0                                                           | 12 | 59.0 ± 21.2    | 11 | 42.3 ± 24.7    | 15 | 45.1 ± 30.1    | 13 | t 0,1665 | t 0,9439 | t 0,2023 | t 0,7952 |
| Immobility over time                              | Three-way ANOVA Time: p<0.0001 Treatment: p=0.4950 Genotype: p=0.2157 |    |                |    |                |    |                |    |          |          |          |          |
| Time of immobility [s] - 0-6min                   | 83.8 ± 64.7                                                           | 12 | 106.2 ± 37.2   | 11 | 78.0 ± 49.6    | 15 | 75.5 ± 50.4    | 13 | t 0,3164 | t 0,8014 | t 0,1011 | t 0,8974 |
| <b>Hot Plate</b>                                  |                                                                       |    |                |    |                |    |                |    |          |          |          |          |
| Latency to first reaction to heat [s]             | 12.7 ± 1.9                                                            | 12 | 13.0 ± 1.9     | 11 | 15.2 ± 2.7     | 15 | 16.8 ± 3.8     | 13 | t 0,6931 | t 0,0101 | t 0,0057 | t 0,2215 |
| Latency to first reaction to heat [s]             | 2way ANOVA Genotype: p=0.0002 Treatment: p=0.1902                     |    |                |    |                |    |                |    |          |          |          |          |

| 1st Cohort Females                                  | Group 1                      |     | Group 2                   |     | Group 3                      |     | Group 4                   |     | Comparisons                                                           |                     |                     |                     |
|-----------------------------------------------------|------------------------------|-----|---------------------------|-----|------------------------------|-----|---------------------------|-----|-----------------------------------------------------------------------|---------------------|---------------------|---------------------|
|                                                     | ZBTB20 <sup>fl</sup> placebo | n   | ZBTB20 <sup>fl</sup> rEPO | n   | ZBTB20 <sup>fl</sup> placebo | n   | ZBTB20 <sup>fl</sup> rEPO | n   | Group 1vs2                                                            | Group 1vs3          | Group 2vs4          | Group 3vs4          |
| <b>Open Field</b>                                   |                              |     |                           |     |                              |     |                           |     |                                                                       |                     |                     |                     |
| Escape latency [s]                                  | 16.1 ± 10.4                  | 14  | 15.6 ± 6.6                | 13  | 17.1 ± 9.8                   | 14  | 18.7 ± 10.4               | 13  | t 0.8758                                                              | t 0.7958            | t 0.3800            | t 0.6950            |
| Track length total [cm]                             | 4227.0 ± 1258.0              | 14  | 4503.0 ± 1252.0           | 13  | 5646.0 ± 1488.0              | 14  | 6059.0 ± 1942.0           | 14  | U 0.8300                                                              | U <b>0.0186</b>     | U <b>0.0145</b>     | U 0.7006            |
| Track length total [cm]                             |                              |     |                           |     |                              |     |                           |     | 2way ANOVA Genotype: p=0.0006 Treatment: p=0.3973                     |                     |                     |                     |
| Velocity avg [cm/s]                                 | 10.1 ± 3.0                   | 14  | 10.7 ± 3.0                | 13  | 13.5 ± 3.5                   | 14  | 14.4 ± 4.6                | 14  | U 0.8300                                                              | U <b>0.0186</b>     | U <b>0.0145</b>     | U 0.7006            |
| Zone crossings [#]                                  | 639.9 ± 156.4                | 14  | 701.5 ± 130.7             | 13  | 824.1 ± 180.8                | 14  | 868.6 ± 227.9             | 14  | t 0.2763                                                              | U <b>0.0146</b>     | U <b>0.0282</b>     | U 0.7688            |
| Periphery - time within [s]                         | 328.7 ± 51.3                 | 14  | 347.3 ± 31.1              | 13  | 358.9 ± 28.5                 | 14  | 342.8 ± 34.6              | 14  | U 0.2020                                                              | U 0.0690            | U 0.5826            | U 0.1672            |
| Periphery - track length within [cm]                | 2725.0 ± 892.9               | 14  | 3086.0 ± 694.0            | 13  | 4302.0 ± 1492.0              | 14  | 4469.0 ± 1534.0           | 14  | t 0.2506                                                              | U <b>0.0021</b>     | U <b>0.0067</b>     | U 0.7006            |
| Periphery - velocity avg within [cm/s]              | 8.4 ± 2.6                    | 14  | 9.0 ± 2.7                 | 13  | 11.9 ± 3.6                   | 14  | 13.0 ± 4.5                | 14  | U 0.7296                                                              | U <b>0.0079</b>     | U <b>0.0027</b>     | U 0.4898            |
| Periphery - visits to [#]                           | 27.9 ± 11.9                  | 14  | 28.0 ± 10.5               | 13  | 26.1 ± 4.8                   | 14  | 30.1 ± 11.6               | 14  | U 0.9143                                                              | t 0.6099            | U 0.6237            | t 0.2511            |
| Intermediate - time within [s]                      | 73.3 ± 42.0                  | 14  | 62.1 ± 22.2               | 13  | 52.4 ± 23.8                  | 14  | 64.9 ± 27.9               | 14  | t 0.3929                                                              | U 0.1139            | t 0.7761            | U 0.2852            |
| Intermediate - track length within [cm]             | 1271.0 ± 647.2               | 14  | 1255.0 ± 522.2            | 13  | 1177.0 ± 259.5               | 14  | 1377.0 ± 617.1            | 14  | U 0.8674                                                              | t 0.6198            | U 0.6500            | t 0.2775            |
| Intermediate - velocity avg within [cm/s]           | 18.3 ± 4.2                   | 14  | 20.7 ± 5.5                | 13  | 24.6 ± 6.4                   | 14  | 22.4 ± 6.6                | 14  | t 0.2261                                                              | U <b>0.0058</b>     | U 0.3434            | U 0.5943            |
| Intermediate - visits to [#]                        | 40.3 ± 18.4                  | 14  | 34.9 ± 13.8               | 13  | 34.6 ± 8.9                   | 14  | 41.6 ± 17.3               | 14  | U 0.7653                                                              | t 0.3148            | U 0.2740            | t 0.1980            |
| Center - time within [s]                            | 17.8 ± 11.1                  | 14  | 10.5 ± 10.1               | 13  | 8.6 ± 6.1                    | 14  | 12.2 ± 8.0                | 14  | U <b>0.0139</b>                                                       | U <b>0.0042</b>     | U 0.2151            | U 0.1936            |
| Center - track length within [cm]                   | 227.2 ± 137.1                | 14  | 160.6 ± 116.4             | 13  | 166.2 ± 64.3                 | 14  | 211.6 ± 116.7             | 14  | U 0.2388                                                              | U 0.3287            | U 0.1546            | t 0.2163            |
| Center - velocity avg within [cm/s]                 | 13.4 ± 4.4                   | 14  | 18.3 ± 6.7                | 13  | 22.8 ± 7.4                   | 14  | 20.2 ± 7.1                | 14  | t <b>0.0378</b>                                                       | U <b>0.0005</b>     | t 0.4715            | t 0.3466            |
| Center - visits to [#]                              | 13.0 ± 9.2                   | 14  | 7.7 ± 4.5                 | 13  | 8.9 ± 5.2                    | 14  | 11.6 ± 7.1                | 14  | U 0.1064                                                              | U 0.2671            | t 0.1023            | U 0.3564            |
| <b>Hole Board</b>                                   |                              |     |                           |     |                              |     |                           |     |                                                                       |                     |                     |                     |
| Latency to first visit [s]                          | 48.6 ± 75.3                  | 14  | 36.1 ± 52.5               | 13  | 80.6 ± 93.9                  | 14  | 64.4 ± 59.7               | 14  | U 0.6500                                                              | U 0.2141            | U <b>0.0056</b>     | U 0.6263            |
| Visits [#] - total                                  | 14.7 ± 9.0                   | 14  | 12.5 ± 4.6                | 13  | 10.1 ± 5.6                   | 14  | 13.9 ± 6.7                | 14  | t 0.4353                                                              | t 0.1182            | t 0.5322            | t 0.1122            |
| Visits [#] - non-consecutive                        | 1.1 ± 0.9                    | 14  | 1.1 ± 1.0                 | 13  | 0.9 ± 0.8                    | 14  | 1.3 ± 1.1                 | 14  | U 0.8809                                                              | U 0.4213            | U 0.5966            | U 0.3246            |
| Visits [#] - total revisits                         | 3.1 ± 3.5                    | 14  | 2.5 ± 2.7                 | 13  | 1.9 ± 2.2                    | 14  | 3.0 ± 6.4                 | 14  | U 0.6891                                                              | U 0.4255            | U 0.8216            | U 0.5705            |
| Visits (%) - rigorous revisits                      | 14.9 ± 10.1                  | 14  | 18.0 ± 14.1               | 13  | 7.0 ± 7.3                    | 14  | 15.8 ± 12.6               | 14  | t 0.5260                                                              | U 0.0331            | t 0.6805            | U 0.0530            |
| Visits (%) - rigorous revisits                      |                              |     |                           |     |                              |     |                           |     | 2way ANOVA Genotype: p=0.0982 Treatment: p=0.0526                     |                     |                     |                     |
| <b>Y-Maze</b>                                       |                              |     |                           |     |                              |     |                           |     |                                                                       |                     |                     |                     |
| Entries [#] - total                                 | 18.6 ± 5.8                   | 14  | 17.9 ± 4.3                | 13  | 22.9 ± 8.8                   | 14  | 22.3 ± 8.6                | 14  | t 0.7163                                                              | t 0.1434            | t 0.1070            | t 0.8466            |
| Entries [#] - alternating                           | 10.2 ± 4.4                   | 14  | 10.9 ± 2.2                | 13  | 13.9 ± 5.5                   | 14  | 14.0 ± 6.6                | 14  | t 0.5960                                                              | t 0.0651            | t 0.1178            | t 0.9510            |
| Entries [#] - non-alternating                       | 7.5 ± 4.0                    | 14  | 6.0 ± 3.2                 | 13  | 8.1 ± 5.4                    | 14  | 7.3 ± 4.2                 | 14  | t 0.2896                                                              | t 0.7526            | t 0.3728            | t 0.6689            |
| Entries [#] - alternating vs non-alternating        | t p=0.0990                   |     | t p=0.0001                |     | t p=0.0094                   |     | t p=0.0039                |     |                                                                       |                     |                     |                     |
| Entries [%] - Δ alternating vs non-alternating      | 16.9 ± 35.1                  | 14  | 32.5 ± 23.0               | 13  | 29.1 ± 28.2                  | 14  | 31.1 ± 27.3               | 14  | t 0.1830                                                              | t 0.3227            | t 0.8852            | t 0.8490            |
| Centralization Index - 0-100s                       | 1.003 ± 0.0027               | 130 | 1.003 ± 0.0016            | 130 | 1.004 ± 0.0053               | 140 | 1.003 ± 0.0018            | 140 | U 0.1759                                                              | U 0.7885            | U 0.0504            | U 0.3960            |
| Centralization Index - 100-200s                     | 1.003 ± 0.0028               | 130 | 1.002 ± 0.0026            | 130 | 1.003 ± 0.0049               | 140 | 1.001 ± 0.0015            | 140 | U 0.5297                                                              | U 0.2674            | U <b>0.0239</b>     | U <b>&lt;0.0001</b> |
| Centralization Index - 200-300s                     | 1.001 ± 0.0017               | 130 | 1.001 ± 0.0031            | 130 | 1.002 ± 0.0031               | 140 | 1.001 ± 0.0017            | 140 | U 0.3501                                                              | U <b>0.0459</b>     | U 0.1341            | U 0.0921            |
| Centralization Index - 0-300s                       |                              |     |                           |     |                              |     |                           |     | Three-way ANOVA Time: p<0.0001 Treatment: p=0.3079 Genotype: p=0.6359 |                     |                     |                     |
| <b>Social Interaction in Pairs</b>                  |                              |     |                           |     |                              |     |                           |     |                                                                       |                     |                     |                     |
| Track length total [m]                              | 30.8 ± 2.7                   | 14  | 35.1 ± 6.4                | 12  | 45.3 ± 3.8                   | 14  | 45.9 ± 3.0                | 14  | t <b>0.0471</b>                                                       | t <b>&lt;0.0001</b> | t <b>&lt;0.0001</b> | t 0.6628            |
| Distance nose-nose [cm] - avg over full time (10s)  |                              |     |                           |     |                              |     |                           |     | Three-way ANOVA Time: p=0.3679 Treatment: p=0.1185 Genotype: p=0.5753 |                     |                     |                     |
| Distance nose-nose [cm] - total avg                 | 17.26 ± 1.25                 | 7   | 18.14 ± 1.04              | 6   | 17.23 ± 0.94                 | 7   | 17.68 ± 1.03              | 7   | t 0.1908                                                              | t 0.9673            | t 0.4407            | t 0.4092            |
| Distance nose-nose [cm] - avg over 1. minute (2s)   |                              |     |                           |     |                              |     |                           |     | Three-way ANOVA Time: p=0.4559 Treatment: p=0.0593 Genotype: p=0.8218 |                     |                     |                     |
| Distance nose-nose [cm] - 1. minute avg             | 17.4 ± 1.6                   | 7   | 18.0 ± 1.0                | 6   | 17.0 ± 1.1                   | 7   | 18.6 ± 1.5                | 7   | t 0.4812                                                              | t 0.5972            | t 0.4111            | t 0.0555            |
| Distance nose-nose [cm] - avg over 3 minutes (10s)  |                              |     |                           |     |                              |     |                           |     | Three-way ANOVA Time: p=0.2062 Treatment: p=0.0363 Genotype: p=0.7064 |                     |                     |                     |
| Distance nose-nose [cm] - 1. minute avg             | 16.9 ± 1.5                   | 7   | 18.4 ± 0.9                | 6   | 17.5 ± 0.9                   | 7   | 18.2 ± 1.6                | 7   | t 0.0591                                                              | t 0.4165            | t 0.7930            | t 0.3135            |
| <b>Three Chamber Sociability Test</b>               |                              |     |                           |     |                              |     |                           |     |                                                                       |                     |                     |                     |
| Social preference (SP) - overall distance [cm]      | 3290.0 ± 528.8               | 14  | 3595.0 ± 984.2            | 13  | 4499.0 ± 750.0               | 14  | 4037.0 ± 746.6            | 14  | U 0.5186                                                              | t <b>&lt;0.0001</b> | U <b>0.0377</b>     | t 0.1147            |
| SP - zone crossings [#]                             | 559.9 ± 89.1                 | 14  | 586.0 ± 132.2             | 13  | 697.8 ± 77.6                 | 14  | 643.4 ± 108.1             | 14  | U 0.7837                                                              | U <b>0.0002</b>     | U <b>0.0263</b>     | U 0.1035            |
| SP - time in stimulus chamber [s]                   | 81.3 ± 30.3                  | 14  | 92.2 ± 28.6               | 13  | 61.9 ± 20.1                  | 14  | 49.4 ± 17.7               | 14  | t 0.3479                                                              | U 0.0637            | t <b>0.0002</b>     | U 0.1251            |
| SP - time in empty chamber [s]                      | 65.9 ± 32.4                  | 14  | 73.3 ± 31.5               | 13  | 53.5 ± 15.4                  | 14  | 43.8 ± 12.1               | 14  | U 0.8300                                                              | U 0.3287            | U <b>0.0003</b>     | U <b>0.0310</b>     |
| SP - time in stimulus vs empty chamber [s]          | t p=0.2051                   |     | U p=0.0338                |     | U p=0.8388                   |     | t p=0.3329                |     |                                                                       |                     |                     |                     |
| SP - track length in stimulus chamber [cm]          | 612.1 ± 204.0                | 14  | 666.3 ± 205.3             | 13  | 696.9 ± 141.1                | 14  | 555.9 ± 197.4             | 14  | t 0.4976                                                              | t 0.2133            | t 0.1675            | t <b>0.0401</b>     |
| SP - track length in empty chamber [cm]             | 548.5 ± 224.3                | 14  | 666.0 ± 255.8             | 13  | 658.1 ± 189.4                | 14  | 546.8 ± 158.0             | 14  | t 0.2181                                                              | U 0.1251            | U 0.2199            | U <b>0.0310</b>     |
| SP - track length in stimulus vs empty chamber [cm] | t p=0.4401                   |     | t p=0.9970                |     | U p=0.8743                   |     | U p=0.5714                |     |                                                                       |                     |                     |                     |
| SP - visits to stimulus chamber [#]                 | 32.6 ± 9.5                   | 14  | 35.9 ± 10.3               | 13  | 45.9 ± 8.2                   | 14  | 35.1 ± 11.8               | 14  | t 0.4106                                                              | t <b>0.0006</b>     | t 0.8700            | t <b>0.0104</b>     |
| SP - visits to empty chamber [#]                    | 25.4 ± 8.6                   | 14  | 29.1 ± 9.0                | 13  | 37.9 ± 12.0                  | 14  | 30.9 ± 6.0                | 14  | t 0.2934                                                              | t <b>0.0042</b>     | t 0.5552            | t 0.0633            |
| SP - visits to stimulus vs empty chamber [#]        | t p=0.0460                   |     | t p=0.0868                |     | t p=0.0530                   |     | t p=0.2409                |     |                                                                       |                     |                     |                     |
| SP - latency to stimulus chamber [s]                | 43.2 ± 65.4                  | 14  | 55.6 ± 65.6               | 13  | 33.0 ± 39.2                  | 14  | 60.8 ± 61.5               | 14  | U 0.5186                                                              | U 0.8642            | U 0.6160            | U 0.1898            |
| SP - latency to empty chamber [s]                   | 131.5 ± 111.9                | 14  | 109.7 ± 99.0              | 13  | 61.3 ± 58.8                  | 14  | 47.1 ± 60.1               | 14  | U 0.6160                                                              | U 0.0767            | U 0.0543            | U 0.4274            |
| SP - latency to stimulus vs empty chamber [s]       | U p=0.0091                   |     | U p=0.1389                |     | U p=0.1603                   |     | U p=0.4013                |     |                                                                       |                     |                     |                     |
| SP - time with stimulus insert [s]                  | 220.7 ± 84.5                 | 14  | 209.9 ± 71.2              | 13  | 255.1 ± 51.9                 | 14  | 265.4 ± 50.5              | 14  | t 0.7205                                                              | t 0.2083            | t <b>0.0301</b>     | t 0.5983            |
| SP - time with empty insert [s]                     | 134.0 ± 38.2                 | 14  | 128.6 ± 55.2              | 13  | 153.7 ± 31.7                 | 14  | 165.5 ± 39.7              | 14  | t 0.7709                                                              | U 0.2100            | U 0.0609            | U 0.3761            |
| SP - time with stimulus vs empty insert [s]         | t p=0.0026                   |     | t p=0.0036                |     | U p=0.0001                   |     | U p=0.0001                |     |                                                                       |                     |                     |                     |
| SP - visits to stimulus insert [#]                  | 22.4 ± 6.2                   | 14  | 24.5 ± 9.0                | 13  | 29.8 ± 5.7                   | 14  | 21.9 ± 6.5                | 14  | t 0.5040                                                              | t <b>0.0031</b>     | t 0.4128            | t <b>0.0022</b>     |
| SP - visits to empty insert [#]                     | 17.4 ± 6.3                   | 14  | 20.2 ± 7.6                | 13  | 23.5 ± 7.3                   | 14  | 19.0 ± 3.6                | 14  | t 0.3090                                                              | t <b>0.0240</b>     | t 0.6246            | t 0.0512            |
| SP - visits to stimulus vs empty insert [#]         | t p=0.0408                   |     | t p=0.1990                |     | t p=0.0176                   |     | t p=0.1554                |     |                                                                       |                     |                     |                     |
| SP - latency to stimulus insert [s]                 | 52.9 ± 69.5                  | 14  | 59.2 ± 66.5               | 13  | 34.9 ± 39.1                  | 14  | 63.5 ± 60.8               | 14  | U 0.5502                                                              | U 0.9820            | U 0.6500            | U 0.1936            |
| SP - latency to empty insert [s]                    | 134.8 ± 110.7                | 14  | 113.3 ± 99.6              | 13  | 62.5 ± 60.1                  | 14  | 48.4 ± 60.4               | 14  | t 0.5992                                                              | U <b>0.0395</b>     | U 0.0609            | U 0.5112            |
| SP - latency to stimulus vs empty insert [s]        | U p=0.0106                   |     | U p=0.1389                |     | U p=0.3064                   |     | U p=0.3287                |     |                                                                       |                     |                     |                     |
| SP - time spent in center [s]                       | 98.0 ± 68.1                  | 14  | 96.0 ± 38.8               | 13  | 75.8 ± 17.7                  | 14  | 75.8 ± 16.9               | 14  | U 0.7564                                                              | U 0.3287            | U 0.2800            | U 0.6027            |
| SP - track length within center [cm]                | 870.2 ± 444.2                | 14  | 1027.0 ± 665.6            | 13  | 1163.0 ± 322.3               | 14  | 1046.0 ± 297.2            | 14  | U 0.5826                                                              | U <b>0.0241</b>     | U 0.1546            | U 0.3279            |
| SP - visits to center [#]                           | 18.4 ± 7.6                   | 14  | 20.1 ± 6.8                | 13  | 30.9 ± 8.6                   | 14  | 25.6 ± 9.5                | 14  | U 0.5244                                                              | t <b>0.0004</b>     | U 0.1798            | t 0.1357            |
| Centralization Index - Habituation                  |                              |     |                           |     |                              |     |                           |     | Three-way ANOVA Time: p<0.0001 Treatment: p=0.5670 Genotype: p=0.2959 |                     |                     |                     |
| Centralization Index - Social Preference            |                              |     |                           |     |                              |     |                           |     | Three-way ANOVA Time: p=0.4840 Treatment: p=0.3048 Genotype: p=0.0063 |                     |                     |                     |
| <b>Marble Burying</b>                               |                              |     |                           |     |                              |     |                           |     |                                                                       |                     |                     |                     |
| Marbles buried - total [%]                          | 23.2 ± 21.5                  | 14  | 17.6 ± 13.2               | 13  | 2.4 ± 4.8                    | 14  | 5.4 ± 7.4                 | 14  | t 0.4217                                                              | U <b>0.0009</b>     | U <b>0.0078</b>     | U 0.3156            |
| Marbles buried - total [%]                          |                              |     |                           |     |                              |     |                           |     | 2way ANOVA Genotype: p<0.0001 Treatment: p=0.7368                     |                     |                     |                     |
| Marbles buried - center [%]                         | 16.1 ± 26.6                  | 14  | 5.8 ± 14.1                | 13  | 0.9 ± 3.3                    | 14  | 1.8 ± 6.7                 | 14  | U 0.1000                                                              | U <b>0.0213</b>     | U 0.3467            | U >0.9999           |
| Marbles buried - periphery [%]                      | 26.8 ± 22.3                  | 14  | 23.6 ± 16.0               | 13  | 3.1 ± 5.9                    | 14  | 7.1 ± 9.4                 | 14  | t 0.6673                                                              | U <b>0.0008</b>     | U <b>0.0047</b>     | U 0.3011            |
| <b>Nest Building Test</b>                           |                              |     |                           |     |                              |     |                           |     |                                                                       |                     |                     |                     |
| Nest Building Score [AU]                            | 2.9 ± 1.0                    | 14  | 2.7 ± 1.2                 | 13  | 1.1 ± 0.3                    | 14  | 1.3 ± 0.5                 | 14  | U 0.5818                                                              | U <b>&lt;0.0001</b> | U <b>0.0009</b>     | U 0.3427            |

|                                                        |                                                                       |    |                 |     |                 |    |                 |    |     |               |     |               |     |               |     |               |
|--------------------------------------------------------|-----------------------------------------------------------------------|----|-----------------|-----|-----------------|----|-----------------|----|-----|---------------|-----|---------------|-----|---------------|-----|---------------|
| Circling - total events [#]                            | 986.4 ± 356.9                                                         | 14 | 1089.0 ± 814.3  | 13  | 1231.0 ± 1121.0 | 14 | 2300.0 ± 1668.0 | 14 | U   | 0.6410        | U   | 0.7345        | U   | <b>0.0104</b> | U   | <b>0.0162</b> |
| Circling - average duration [s]                        | 3.7 ± 0.2                                                             | 14 | 3.7 ± 0.2       | 13  | 3.7 ± 0.2       | 14 | 3.8 ± 0.2       | 14 | t   | 0.4312        | t   | 0.3174        | t   | 0.3622        | t   | 0.4572        |
| Circling - average duration [s] pooled by genotype     | U p=0.5798                                                            |    |                 |     |                 |    |                 |    |     |               |     |               |     |               |     |               |
| Circling - average perimeter [mm]                      | 193.5 ± 44.2                                                          | 14 | 198.3 ± 79.6    | 13  | 226.2 ± 56.9    | 14 | 269.6 ± 92.2    | 14 | U   | 0.6848        | U   | <b>0.0162</b> | U   | <b>0.0091</b> | U   | 0.4013        |
| Circling - average velocity [mm/s]                     | 61.6 ± 15.8                                                           | 14 | 61.9 ± 25.9     | 13  | 72.4 ± 19.9     | 14 | 89.0 ± 36.0     | 14 | U   | 0.5502        | U   | <b>0.0310</b> | U   | <b>0.0145</b> | U   | 0.4544        |
| <b>Vocalization</b>                                    |                                                                       |    |                 |     |                 |    |                 |    |     |               |     |               |     |               |     |               |
| Latency to first call [s]                              | 20.4 ± 46.8                                                           | 14 | 24.6 ± 47.4     | 13  | 36.4 ± 62.6     | 14 | 17.8 ± 47.5     | 14 | U   | 0.2960        | U   | 0.4070        | U   | 0.0673        | U   | 0.0835        |
| Number of calls [#]                                    | 440.4 ± 274.9                                                         | 14 | 326.8 ± 282.4   | 13  | 443.1 ± 376.4   | 14 | 605.9 ± 297.4   | 14 | U   | 0.3564        | U   | 0.7343        | U   | <b>0.0297</b> | U   | 0.3578        |
| Duration of calling [s]                                | 14.7 ± 10.0                                                           | 14 | 13.4 ± 14.6     | 13  | 17.5 ± 16.3     | 14 | 26.0 ± 14.8     | 14 | U   | 0.5272        | U   | 0.6915        | U   | <b>0.0492</b> | U   | 0.1893        |
| <b>Prepulse Inhibition (PPI)</b>                       |                                                                       |    |                 |     |                 |    |                 |    |     |               |     |               |     |               |     |               |
| Hearing - 65 dB [AU]                                   | 0.9 ± 1.4                                                             | 10 | 0.7 ± 0.3       | 9   | 0.9 ± 1.2       | 12 | 0.9 ± 1.2       | 7  | U   | 0.1173        | U   | <b>0.0426</b> | U   | 0.0851        | U   | 0.1369        |
| Hearing - 120 dB [AU]                                  | 2.9 ± 1.0                                                             | 10 | 5.2 ± 2.8       | 9   | 2.9 ± 2.8       | 12 | 3.4 ± 2.2       | 7  | t   | <b>0.0429</b> | U   | 0.1802        | t   | 0.1829        | U   | 0.1956        |
| Hearing - 65 dB vs 120 dB                              | U p=0.0015 U p<0.0001 U p=0.0003 U p=0.0070                           |    |                 |     |                 |    |                 |    |     |               |     |               |     |               |     |               |
| PPI - 70dB [%]                                         | 41.7 ± 8.8                                                            | 10 | 27.9 ± 17.7     | 9   | 30.1 ± 11.5     | 12 | 39.2 ± 12.7     | 7  | t   | 0.0562        | t   | <b>0.0145</b> | t   | 0.1606        | t   | 0.1488        |
| PPI - 75dB [%]                                         | 52.4 ± 15.2                                                           | 10 | 44.7 ± 19.2     | 9   | 44.4 ± 19.6     | 12 | 58.6 ± 10.6     | 7  | t   | 0.3515        | t   | 0.2964        | t   | 0.0891        | t   | 0.0568        |
| PPI - 80dB [%]                                         | 60.5 ± 15.1                                                           | 10 | 60.1 ± 18.9     | 9   | 55.4 ± 12.1     | 12 | 61.7 ± 14.2     | 7  | t   | 0.9592        | t   | 0.4019        | U   | >0.9999       | U   | 0.3402        |
| PPI one-way/2way ANOVA sound intensity                 | <b>0.0147</b>                                                         |    | <b>0.0048</b>   |     | <b>0.0009</b>   |    | <b>0.0073</b>   |    | 2wA | 0.2578        | 2wA | 0.0901        | 2wA | 0.2187        | 2wA | 0.0624        |
| <b>Morris Water Maze</b>                               |                                                                       |    |                 |     |                 |    |                 |    |     |               |     |               |     |               |     |               |
| Visible 1 - escape latency [s]                         | 20.6 ± 10.1                                                           | 14 | 21.9 ± 9.3      | 13  | 36.5 ± 17.2     | 14 | 49.6 ± 24.5     | 14 | t   | 0.7269        | t   | <b>0.0070</b> | t   | <b>0.0011</b> | t   | 0.1165        |
| Visible 2 - escape latency [s]                         | 9.8 ± 7.2                                                             | 14 | 9.2 ± 9.1       | 13  | 7.4 ± 5.5       | 14 | 12.4 ± 12.3     | 14 | U   | 0.6160        | U   | 0.2852        | U   | 0.4296        | U   | 0.2456        |
| Visible 1 vs 2 - escape latency [s]                    | U p=0.0014 U p=0.0003 U p=0.0003 U p<0.0001                           |    |                 |     |                 |    |                 |    |     |               |     |               |     |               |     |               |
| Visible 1 - track length [cm]                          | 409.7 ± 189.3                                                         | 14 | 466.9 ± 182.6   | 13  | 829.5 ± 379.2   | 14 | 1082.0 ± 497.3  | 14 | t   | 0.4316        | t   | <b>0.0015</b> | t   | <b>0.0005</b> | t   | 0.1438        |
| Visible 2 - track length [cm]                          | 198.1 ± 96.5                                                          | 14 | 199.7 ± 166.5   | 13  | 190.7 ± 118.0   | 14 | 303.5 ± 274.9   | 14 | U   | 0.8500        | t   | 0.8949        | U   | 0.3022        | U   | 0.2852        |
| Visible 1 vs 2 - track length [cm]                     | t p=0.0013 U p=0.0004 t p=0.0001 U p<0.0001                           |    |                 |     |                 |    |                 |    |     |               |     |               |     |               |     |               |
| Visible 1 - velocity [cm/s]                            | 21.6 ± 3.3                                                            | 14 | 24.0 ± 7.5      | 13  | 23.7 ± 3.1      | 14 | 23.0 ± 2.7      | 14 | U   | 0.1852        | U   | 0.0556        | U   | 0.6160        | t   | 0.5151        |
| Visible 2 - velocity [cm/s]                            | 23.2 ± 4.1                                                            | 14 | 23.8 ± 4.2      | 13  | 27.9 ± 4.3      | 14 | 26.9 ± 3.4      | 14 | t   | 0.7068        | t   | <b>0.0067</b> | t   | 0.0520        | t   | 0.4913        |
| Visible 1 vs 2 - velocity [cm/s]                       | U p=0.0444 U p=0.5788 t p=0.0074 t p=0.0027                           |    |                 |     |                 |    |                 |    |     |               |     |               |     |               |     |               |
| Hidden 1 - escape latency [s]                          | 66.4 ± 19.9                                                           | 14 | 57.8 ± 19.8     | 13  | 65.5 ± 16.4     | 14 | 62.9 ± 22.3     | 14 | t   | 0.2702        | t   | 0.9010        | t   | 0.5372        | t   | 0.7198        |
| Hidden 2 - escape latency [s]                          | 51.5 ± 27.3                                                           | 14 | 34.3 ± 19.7     | 13  | 58.3 ± 17.4     | 14 | 54.6 ± 18.8     | 14 | t   | 0.0707        | t   | 0.4384        | t   | <b>0.0113</b> | t   | 0.5915        |
| Hidden 3 - escape latency [s]                          | 41.6 ± 25.6                                                           | 14 | 33.5 ± 20.8     | 13  | 44.8 ± 17.7     | 14 | 46.6 ± 24.9     | 14 | U   | 0.4798        | U   | 0.5938        | U   | 0.1279        | t   | 0.8340        |
| Hidden 4 - escape latency [s]                          | 34.2 ± 13.3                                                           | 14 | 28.5 ± 10.6     | 13  | 44.7 ± 19.6     | 14 | 38.1 ± 22.3     | 14 | t   | 0.2471        | t   | 0.1096        | U   | 0.3754        | U   | 0.1936        |
| Hidden 5 - escape latency [s]                          | 32.2 ± 13.2                                                           | 14 | 27.1 ± 20.8     | 13  | 38.7 ± 22.4     | 14 | 35.6 ± 17.6     | 14 | U   | 0.0945        | U   | 0.7688        | U   | 0.0543        | U   | 0.9820        |
| Hidden 6 - escape latency [s]                          | 29.8 ± 24.8                                                           | 14 | 28.9 ± 22.1     | 13  | 34.8 ± 15.7     | 14 | 34.7 ± 18.8     | 14 | U   | 0.7305        | U   | 0.2273        | U   | 0.3255        | t   | 0.9816        |
| Hidden 7 - escape latency [s]                          | 32.3 ± 24.7                                                           | 14 | 26.3 ± 22.6     | 13  | 34.4 ± 19.0     | 14 | 32.2 ± 17.7     | 14 | U   | 0.4583        | U   | 0.6027        | U   | 0.1408        | U   | 0.6347        |
| Hidden 8 - escape latency [s]                          | 27.2 ± 19.4                                                           | 14 | 22.7 ± 21.6     | 13  | 34.9 ± 23.8     | 14 | 28.8 ± 18.7     | 14 | U   | 0.4879        | U   | 0.3287        | U   | 0.2588        | U   | 0.5409        |
| Hidden 1-8 - escape latency over time                  | Three-way ANOVA Time: p<0.0001 Treatment: p=0.1933 Genotype: p=0.0600 |    |                 |     |                 |    |                 |    |     |               |     |               |     |               |     |               |
| Probe Trial 1 (PT) - time in target quadrant (TQ) [s]  | 30.4 ± 13.6                                                           | 14 | 35.5 ± 13.8     | 13  | 23.7 ± 6.4      | 14 | 27.3 ± 8.7      | 14 | t   | 0.3415        | t   | 0.1164        | t   | 0.0820        | t   | 0.2342        |
| Probe Trial 1 (PT) - time in target quadrant (TQ) [s]  | 2way ANOVA Genotype: p=0.0153 Treatment: p=0.1504                     |    |                 |     |                 |    |                 |    |     |               |     |               |     |               |     |               |
| PT 1 - visits to TQ [#]                                | 11.9 ± 5.9                                                            | 14 | 14.5 ± 5.7      | 13  | 9.6 ± 3.2       | 14 | 9.6 ± 2.9       | 14 | U   | 0.1286        | t   | 0.2170        | U   | <b>0.0032</b> | t   | 0.9512        |
| PT 1 - latency to former escape platform [s]           | 25.6 ± 23.3                                                           | 14 | 16.1 ± 15.1     | 13  | 16.8 ± 19.4     | 14 | 21.2 ± 21.0     | 14 | U   | 0.2849        | U   | 0.2062        | U   | 0.6147        | U   | 0.5585        |
| PT 1 - visits to former escape platform [#]            | 3.3 ± 2.8                                                             | 14 | 4.6 ± 3.1       | 13  | 2.1 ± 2.2       | 14 | 1.8 ± 1.6       | 14 | t   | 0.2534        | U   | 0.2245        | t   | <b>0.0088</b> | U   | 0.9005        |
| PT 1 - total track length [cm]                         | 1632.0 ± 517.4                                                        | 14 | 1771.0 ± 370.6  | 13  | 2075.0 ± 294.7  | 14 | 2022.0 ± 228.7  | 14 | U   | 0.4879        | U   | <b>0.0049</b> | U   | <b>0.0078</b> | t   | 0.5991        |
| PT 1 - total track length [cm]                         | 2way ANOVA Genotype: p=0.0009 Treatment: p=0.6789                     |    |                 |     |                 |    |                 |    |     |               |     |               |     |               |     |               |
| Reversal 1 - escape latency [s]                        | 37.8 ± 27.8                                                           | 14 | 36.8 ± 30.0     | 13  | 36.4 ± 23.1     | 14 | 41.2 ± 26.4     | 14 | U   | 0.8032        | U   | >0.9999       | U   | 0.6160        | t   | 0.6084        |
| Reversal 2 - escape latency [s]                        | 30.0 ± 12.5                                                           | 14 | 36.9 ± 12.1     | 13  | 32.1 ± 20.7     | 14 | 30.9 ± 15.7     | 14 | t   | 0.1554        | t   | 0.7437        | t   | 0.2775        | t   | 0.8664        |
| Reversal 3 - escape latency [s]                        | 29.2 ± 24.9                                                           | 14 | 26.5 ± 23.9     | 13  | 29.2 ± 16.7     | 14 | 32.0 ± 23.7     | 14 | U   | 0.7564        | U   | 0.6673        | U   | 0.5186        | t   | 0.7223        |
| Reversal 4 - escape latency [s]                        | 21.1 ± 21.0                                                           | 14 | 22.1 ± 22.3     | 13  | 20.5 ± 13.9     | 14 | 29.1 ± 19.6     | 14 | U   | 0.7203        | U   | 0.6673        | U   | 0.1852        | U   | 0.1499        |
| Reversal 1-4 - escape latency over time // Gen./Treat. | p=0.2790                                                              |    | p=0.2607        |     | p=0.1667        |    | p=0.4637        |    | 2wA | 0.8712        | 2wA | 0.9947        | 2wA | 0.6842        | 2wA | 0.4701        |
| Reversal 1-4 - escape latency over time                | Three-way ANOVA Time: p=0.0008 Treatment: p=0.5597 Genotype: p=0.7370 |    |                 |     |                 |    |                 |    |     |               |     |               |     |               |     |               |
| Probe Trial 2 (PT) - time in target quadrant (TQ) [s]  | 40.1 ± 17.8                                                           | 14 | 34.8 ± 12.4     | 13  | 26.2 ± 7.1      | 14 | 28.9 ± 9.3      | 14 | U   | 0.6500        | U   | <b>0.0067</b> | t   | 0.1712        | t   | 0.3947        |
| Probe Trial 2 (PT) - time in target quadrant (TQ) [s]  | 2way ANOVA Genotype: p=0.0040 Treatment: p=0.7227                     |    |                 |     |                 |    |                 |    |     |               |     |               |     |               |     |               |
| PT 2 - visits to TQ [#]                                | 14.5 ± 5.5                                                            | 14 | 16.5 ± 6.9      | 13  | 12.6 ± 3.2      | 14 | 12.0 ± 5.6      | 14 | t   | 0.4079        | t   | 0.2891        | t   | 0.0750        | t   | 0.7141        |
| PT 2 - latency to former escape platform [s]           | 21.8 ± 21.0                                                           | 14 | 11.3 ± 10.2     | 13  | 19.2 ± 17.8     | 14 | 8.8 ± 11.4      | 14 | t   | 0.1093        | U   | 0.8387        | U   | 0.3812        | U   | <b>0.0191</b> |
| PT 2 - visits to former escape platform [#]            | 3.6 ± 2.5                                                             | 14 | 4.8 ± 3.1       | 13  | 2.9 ± 1.7       | 14 | 2.6 ± 2.5       | 14 | t   | 0.2784        | t   | 0.3373        | t   | 0.0527        | t   | 0.7899        |
| PT 2 - total track length [cm]                         | 1598.0 ± 485.6                                                        | 14 | 1656.0 ± 413.6  | 13  | 2152.0 ± 221.6  | 14 | 1912.0 ± 407.4  | 14 | U   | 0.9430        | U   | <0.0001       | U   | <b>0.0222</b> | U   | 0.3064        |
| PT 2 - total track length [cm]                         | 2way ANOVA Genotype: p=0.0004 Treatment: p=0.3871                     |    |                 |     |                 |    |                 |    |     |               |     |               |     |               |     |               |
| <b>Complex Wheel Running</b>                           |                                                                       |    |                 |     |                 |    |                 |    |     |               |     |               |     |               |     |               |
| Distance [m] - over time                               | Three-way ANOVA Time: p<0.0001 Treatment: p=0.8813 Genotype: p=0.4889 |    |                 |     |                 |    |                 |    |     |               |     |               |     |               |     |               |
| Distance [m] - total                                   | 1935.2 ± 317.6                                                        | 7  | 1895.1 ± 347.8  | 6   | 1801.7 ± 456.2  | 7  | 1786.7 ± 546.0  | 7  | t   | 0.8334        | U   | >0.9999       | t   | 0.6743        | U   | 0.9015        |
| Time [min] - total                                     | 148.7 ± 15.0                                                          | 7  | 142.2 ± 13.1    | 6   | 141.6 ± 36.0    | 7  | 137.5 ± 43.3    | 7  | t   | 0.5620        | U   | 0.9015        | t   | 0.8117        | U   | 0.8048        |
| Velocity [m/s] - average                               | 0.233 ± 0.035                                                         | 7  | 0.241 ± 0.019   | 6   | 0.223 ± 0.029   | 7  | 0.227 ± 0.031   | 7  | t   | 0.5845        | t   | 0.5899        | t   | 0.3405        | t   | 0.8063        |
| <b>Magnet Resonance Tomography</b>                     |                                                                       |    |                 |     |                 |    |                 |    |     |               |     |               |     |               |     |               |
| Olfactory bulb - volume [mm3]                          | 26.78 ± 0.492                                                         | 7  | 27.17 ± 0.617   | 7   | 25.9 ± 0.736    | 7  | 25.49 ± 0.624   | 7  | t   | 0.2244        | t   | <b>0.0231</b> | t   | <b>0.0003</b> | t   | 0.2934        |
| Olfactory bulb - volume [mm3]                          | 2way ANOVA Genotype: p<0.0001 Treatment: p=0.9708                     |    |                 |     |                 |    |                 |    |     |               |     |               |     |               |     |               |
| Thalamus - volume [mm3]                                | 17.55 ± 0.605                                                         | 7  | 17.73 ± 0.301   | 7   | 18.35 ± 0.533   | 7  | 17.43 ± 0.801   | 7  | t   | 0.4930        | t   | <b>0.0216</b> | t   | 0.3828        | t   | <b>0.0286</b> |
| Thalamus - volume [mm3]                                | 2way ANOVA Genotype: p=0.3097 Treatment: p=0.1421                     |    |                 |     |                 |    |                 |    |     |               |     |               |     |               |     |               |
| Hippocampus - volume [mm3]                             | 66.48 ± 1.088                                                         | 7  | 65.54 ± 2.124   | 7   | 69.34 ± 1.779   | 7  | 66.97 ± 2.34    | 7  | t   | 0.3245        | t   | <b>0.0047</b> | t   | 0.2534        | t   | 0.0561        |
| Hippocampus - volume [mm3]                             | 2way ANOVA Genotype: p=0.0060 Treatment: p=0.0293                     |    |                 |     |                 |    |                 |    |     |               |     |               |     |               |     |               |
| Corpus Callosum - volume [mm3]                         | 1.135 ± 0.027                                                         | 7  | 1.158 ± 0.052   | 7   | 1.149 ± 0.050   | 7  | 1.137 ± 0.031   | 7  | t   | 0.3203        | t   | 0.5252        | t   | 0.3670        | t   | 0.5855        |
| Corpus Callosum - volume [mm3]                         | 2way ANOVA Genotype: p=0.8187 Treatment: p=0.7373                     |    |                 |     |                 |    |                 |    |     |               |     |               |     |               |     |               |
| Ventricles - volume [mm3]                              | 11.43 ± 0.989                                                         | 7  | 10.41 ± 0.889   | 7   | 11.66 ± 0.978   | 7  | 10.16 ± 0.532   | 7  | t   | 0.0262        | t   | 0.6753        | U   | 0.9015        | t   | <b>0.0058</b> |
| Ventricles - volume [mm3]                              | 2way ANOVA Genotype: p=0.9689 Treatment: p=0.0007                     |    |                 |     |                 |    |                 |    |     |               |     |               |     |               |     |               |
| Cerebellum - volume [mm3]                              | 55.46 ± 0.544                                                         | 7  | 54.7 ± 1.496    | 7   | 57.68 ± 1.55    | 7  | 55.72 ± 1.615   | 7  | t   | 0.2472        | t   | <b>0.0080</b> | t   | 0.2443        | t   | <b>0.0391</b> |
| Cerebellum - volume [mm3]                              | 2way ANOVA Genotype: p=0.0047 Treatment: p=0.0156                     |    |                 |     |                 |    |                 |    |     |               |     |               |     |               |     |               |
| Brain matter - volume [mm3]                            | 492 ± 9.738                                                           | 7  | 496.8 ± 13.96   | 7   | 506.7 ± 15.93   | 7  | 492.8 ± 12      | 7  | U   | 0.3176        | t   | 0.0640        | U   | 0.5350        | t   | 0.0909        |
| Brain matter - volume [mm3]                            | 2way ANOVA Genotype: p=0.3137 Treatment: p=0.3858                     |    |                 |     |                 |    |                 |    |     |               |     |               |     |               |     |               |
| Brain - volume [mm3]                                   | 503.4 ± 10.01                                                         | 7  | 507.2 ± 14.45   | 7   | 518.4 ± 16.54   | 7  | 502.9 ± 12.24   | 7  | t   | 0.5851        | t   | 0.0686        | t   | 0.5633        | t   | 0.0723        |
| Brain - volume [mm3]                                   | 2way ANOVA Genotype: p=0.3295 Treatment: p=0.2857                     |    |                 |     |                 |    |                 |    |     |               |     |               |     |               |     |               |
| <b>Organ Collection</b>                                |                                                                       |    |                 |     |                 |    |                 |    |     |               |     |               |     |               |     |               |
| Body weight [g]                                        | 24.00 ± 1.16                                                          | 7  | 23.43 ± 1.13    | 7   | 23.29 ± 1.89    | 7  | 22.57 ± 0.98    | 7  | t   | 0.3686        | t   | 0.4136        | t   | 0.1560        | t   | 0.3974        |
| Tibia length [mm]                                      | 18.20 ± 0.30                                                          | 7  | 18.26 ± 0.26    | 7   | 18.92 ± 0.32    | 7  | 18.53 ± 0.60    | 7  | t   | 0.7074        | t   | <b>0.0009</b> | t   | 0.3041        | t   | 0.1609        |
| Brain - weight [g]                                     | 0.4498 ± 0.0250                                                       | 7  | 0.4517 ± 0.0175 | 7   | 0.4539 ± 0.0158 | 7  | 0.4494 ± 0.0188 | 7  | t   | 0.8779        | U   | 0.9015        | t   | 0.8232        | U   | 0.5350        |
| Brain - weight [g] pooled by genotype                  | t p=0.8991                                                            |    |                 |     |                 |    |                 |    |     |               |     |               |     |               |     |               |
| Brain - dry weight [g]                                 | 0.0994 ± 0.0059                                                       | 7  | 0.0995 ± 0.0041 | 7</ |                 |    |                 |    |     |               |     |               |     |               |     |               |

**2nd Cohort Females**

| <b>Neophobia</b>                                   |                                                                       |    |                |    |                |   |                |    |                 |                 |                 |                 |
|----------------------------------------------------|-----------------------------------------------------------------------|----|----------------|----|----------------|---|----------------|----|-----------------|-----------------|-----------------|-----------------|
| Track length - total [cm]                          | 2334.0 ± 324.4                                                        | 16 | 2281.0 ± 304.6 | 15 | 2550.0 ± 321.5 | 8 | 2680.0 ± 442.1 | 11 | t 0.6417        | t 0.1433        | t <b>0.0196</b> | t 0.4678        |
| Zone crossings - total [cm]                        | 275.2 ± 36.8                                                          | 16 | 265.3 ± 36.3   | 15 | 308.5 ± 21.4   | 8 | 309.1 ± 48.8   | 11 | t 0.4561        | t <b>0.0107</b> | U <b>0.0373</b> | U 0.7331        |
| Interaction time [s] - object 1                    | 36.5 ± 14.0                                                           | 16 | 30.0 ± 12.4    | 15 | 37.5 ± 7.7     | 8 | 34.1 ± 10.7    | 11 | t 0.1866        | t 0.8142        | U 0.5400        | U 0.2723        |
| Interaction time [s] - object 2                    | 28.4 ± 7.9                                                            | 16 | 33.5 ± 13.0    | 15 | 30.1 ± 7.7     | 8 | 32.0 ± 9.4     | 11 | t 0.2027        | t 0.6182        | U 0.7988        | U 0.6574        |
| Interaction time [s] - object 1 vs object 2        | t p=0.0554                                                            |    | t p=0.4666     |    | t p=0.0734     |   | U p=0.7477     |    |                 |                 |                 |                 |
| Interaction time [s] - object 1 + object 2         | 64.9 ± 20.4                                                           | 16 | 63.5 ± 21.6    | 15 | 67.6 ± 13.3    | 8 | 66.2 ± 13.3    | 11 | t 0.8612        | t 0.6935        | t 0.7035        | t 0.8171        |
| Visits [#] - object 1                              | 34.7 ± 12.4                                                           | 16 | 31.5 ± 11.1    | 15 | 44.1 ± 11.1    | 8 | 38.2 ± 13.4    | 11 | t 0.4606        | t 0.0778        | t 0.1942        | t 0.3057        |
| Visits [#] - object 2                              | 20.8 ± 5.0                                                            | 16 | 23.5 ± 7.4     | 15 | 24.5 ± 7.0     | 8 | 26.2 ± 4.7     | 11 | t 0.2434        | t 0.2104        | U 0.2012        | U 0.6997        |
| Visits [#] - object 1 vs object 2                  | t p=0.0005                                                            |    | t p=0.0285     |    | t p=0.0012     |   | U p=0.0048     |    |                 |                 |                 |                 |
| Visits [#] - object 1 + object 2                   | 55.5 ± 15.6                                                           | 16 | 55.1 ± 14.4    | 15 | 68.6 ± 16.4    | 8 | 64.4 ± 13.6    | 11 | t 0.9366        | t 0.0825        | t 0.1076        | t 0.5591        |
| Latency to first visit [s] - object 1              | 4.1 ± 3.1                                                             | 16 | 4.9 ± 4.0      | 15 | 8.1 ± 5.3      | 8 | 6.9 ± 5.2      | 11 | U 0.7194        | t 0.0796        | U 0.4130        | t 0.6366        |
| Latency to first visit [s] - object 2              | 6.3 ± 2.8                                                             | 16 | 4.6 ± 3.8      | 15 | 3.9 ± 2.7      | 8 | 6.1 ± 2.2      | 11 | t 0.1784        | t 0.0692        | t 0.2174        | t 0.0854        |
| Latency to first visit [s] - object 1 vs object 2  | t p=0.0498                                                            |    | U p=0.9349     |    | t p=0.0738     |   | t p=0.6235     |    |                 |                 |                 |                 |
| <b>Rotarod</b>                                     |                                                                       |    |                |    |                |   |                |    |                 |                 |                 |                 |
| Latency to fall [s] - day 1                        | 125.7 ± 48.4                                                          | 16 | 157.3 ± 78.1   | 15 | 140.4 ± 40.4   | 8 | 145.1 ± 41.0   | 11 | t 0.1915        | t 0.4435        | t 0.6099        | t 0.8061        |
| Latency to fall [s] - day 2                        | 159.4 ± 58.4                                                          | 16 | 186.7 ± 55.6   | 15 | 125.6 ± 51.2   | 8 | 160.0 ± 40.5   | 11 | t 0.1940        | t 0.1654        | t 0.1699        | t 0.1395        |
| Latency to fall [s] - day 1 vs day 2               | t p=0.0855                                                            |    | t p=0.2472     |    | t p=0.5332     |   | t p=0.4007     |    |                 |                 |                 |                 |
| <b>Grip Strength</b>                               |                                                                       |    |                |    |                |   |                |    |                 |                 |                 |                 |
| Body weight [g]                                    | 19.4 ± 1.0                                                            | 16 | 19.9 ± 1.0     | 15 | 19.0 ± 0.9     | 8 | 18.5 ± 0.9     | 11 | t 0.1433        | t 0.3153        | t <b>0.0014</b> | t 0.2902        |
| Grip strength [AU] - average                       | 74.6 ± 16.5                                                           | 16 | 67.8 ± 12.2    | 15 | 68.7 ± 10.7    | 8 | 65.0 ± 7.7     | 11 | t 0.2065        | t 0.3053        | t 0.4764        | t 0.4274        |
| Grip strength average/body weight                  | 3.8 ± 0.8                                                             | 16 | 3.4 ± 0.6      | 15 | 3.6 ± 0.6      | 8 | 3.5 ± 0.4      | 11 | t 0.0901        | t 0.4587        | t 0.5934        | t 0.6892        |
| Grip strength [AU] - max force                     | 83.1 ± 15.7                                                           | 16 | 79.7 ± 17.0    | 15 | 78.6 ± 13.9    | 8 | 75.1 ± 7.9     | 11 | t 0.5616        | t 0.4842        | t 0.3712        | t 0.5318        |
| Grip strength max force/body weight                | 4.3 ± 0.7                                                             | 16 | 4.0 ± 0.8      | 15 | 4.1 ± 0.8      | 8 | 4.0 ± 0.4      | 11 | t 0.2841        | t 0.0610        | t 0.8063        | t 0.7680        |
| <b>Marble Burying</b>                              |                                                                       |    |                |    |                |   |                |    |                 |                 |                 |                 |
| Marbles buried - total [%]                         | 17.2 ± 18.6                                                           | 16 | 23.3 ± 16.1    | 15 | 7.8 ± 8.8      | 8 | 6.8 ± 8.2      | 11 | U 0.1953        | U 0.1819        | U <b>0.0033</b> | U 0.5785        |
| Marbles buried - center [%]                        | 14.1 ± 22.8                                                           | 16 | 10.0 ± 13.5    | 15 | 7.8 ± 9.3      | 8 | 2.3 ± 5.1      | 11 | U 0.8565        | U 0.8847        | U 0.1354        | U 0.2489        |
| Marbles buried - periphery [%]                     | 18.8 ± 17.8                                                           | 16 | 30.0 ± 20.8    | 15 | 7.8 ± 9.9      | 8 | 9.1 ± 11.3     | 11 | t 0.1178        | U 0.1441        | U 0.0035        | U 0.9422        |
| Marbles buried - periphery [%]                     | 2way ANOVA Genotype: p=0.0034 Treatment: p=0.4103                     |    |                |    |                |   |                |    |                 |                 |                 |                 |
| <b>Sucrose Preference</b>                          |                                                                       |    |                |    |                |   |                |    |                 |                 |                 |                 |
| Sucrose Preference [%] - day 1                     | 56.8 ± 19.8                                                           | 16 | 55.3 ± 14.4    | 15 | 48.8 ± 18.1    | 8 | 48.7 ± 16.1    | 11 | U 0.5196        | U 0.2636        | t 0.2905        | t 0.9885        |
| Sucrose Preference [%] - day 2                     | 82.0 ± 7.6                                                            | 16 | 81.0 ± 8.5     | 15 | 81.3 ± 9.8     | 8 | 80.4 ± 5.5     | 11 | t 0.7194        | U 0.7523        | t 0.8264        | U 0.2375        |
| Sucrose Preference [%] - day 3                     | 87.9 ± 5.7                                                            | 16 | 87.0 ± 4.3     | 15 | 86.2 ± 4.4     | 8 | 87.4 ± 4.4     | 11 | t 0.6486        | t 0.4482        | t 0.8328        | t 0.5729        |
| Sucrose Preference [%] - over time (one-way ANOVA) | p<0.0001                                                              |    | p<0.0001       |    | p=0.0028       |   | p<0.0001       |    |                 |                 |                 |                 |
| <b>Buried Food Test</b>                            |                                                                       |    |                |    |                |   |                |    |                 |                 |                 |                 |
| Latency to first contact [s] - buried day 1        | 54.1 ± 69.6                                                           | 16 | 73.1 ± 94.8    | 15 | 115.8 ± 104.3  | 8 | 93.5 ± 83.4    | 11 | U 0.6752        | U 0.1021        | U 0.2869        | U 0.7168        |
| Latency to first contact [s] - buried day 2        | 65.1 ± 70.3                                                           | 15 | 76.2 ± 85.5    | 13 | 123.9 ± 113.7  | 7 | 133.6 ± 98.9   | 11 | U 0.9729        | U 0.2898        | U <b>0.0287</b> | U 0.5204        |
| Latency to first contact [s] - visual control      | 4.8 ± 1.9                                                             | 16 | 3.6 ± 1.9      | 15 | 6.5 ± 2.1      | 8 | 5.5 ± 3.2      | 11 | U 0.0722        | t 0.0718        | U 0.0958        | t 0.4032        |
| <b>Tail Suspension Test</b>                        |                                                                       |    |                |    |                |   |                |    |                 |                 |                 |                 |
| Time of immobility [s] - 0-2min                    | 14.7 ± 8.8                                                            | 16 | 22.5 ± 11.5    | 15 | 16.1 ± 9.4     | 8 | 17.1 ± 9.8     | 10 | U 0.0801        | U 0.6206        | t 0.2274        | t 0.8320        |
| Time of immobility [s] - 2-4min                    | 51.1 ± 18.5                                                           | 16 | 65.9 ± 16.3    | 15 | 55.0 ± 18.4    | 8 | 55.9 ± 14.8    | 10 | U <b>0.0221</b> | t 0.6333        | U 0.0995        | t 0.9109        |
| Time of immobility [s] - 4-6min                    | 55.7 ± 25.9                                                           | 16 | 63.8 ± 14.6    | 15 | 66.5 ± 17.7    | 8 | 60.5 ± 22.8    | 10 | t 0.2910        | t 0.2441        | t 0.6932        | t 0.5387        |
| Immobility over time                               | Three-way ANOVA Time: p<0.0001 Treatment: p=0.2304 Genotype: p=0.9098 |    |                |    |                |   |                |    |                 |                 |                 |                 |
| Time of immobility [s] - 0-6min                    | 121.5 ± 38.3                                                          | 16 | 152.1 ± 31.2   | 15 | 137.6 ± 41.2   | 8 | 133.5 ± 38.1   | 10 | U <b>0.0240</b> | U 0.3265        | t 0.2165        | U 0.7618        |
| <b>Forced Swim Test</b>                            |                                                                       |    |                |    |                |   |                |    |                 |                 |                 |                 |
| Time of immobility [s] - 0-2min                    | 6.0 ± 10.7                                                            | 16 | 3.8 ± 3.9      | 15 | 1.8 ± 2.3      | 8 | 4.0 ± 4.4      | 11 | U 0.5893        | U 0.3127        | U 0.8278        | U 0.2965        |
| Time of immobility [s] - 2-4min                    | 31.9 ± 25.6                                                           | 16 | 25.4 ± 15.9    | 15 | 15.4 ± 15.2    | 8 | 11.0 ± 15.0    | 11 | U 0.8386        | U 0.1358        | U <b>0.0087</b> | U 0.3459        |
| Time of immobility [s] - 4-6min                    | 43.7 ± 28.8                                                           | 16 | 51.5 ± 27.1    | 15 | 26.9 ± 24.6    | 8 | 19.5 ± 24.8    | 11 | t 0.4408        | t 0.1564        | U <b>0.0056</b> | U 0.5843        |
| Immobility over time                               | Three-way ANOVA Time: p<0.0001 Treatment: p=0.7074 Genotype: p=0.0037 |    |                |    |                |   |                |    |                 |                 |                 |                 |
| Time of immobility [s] - 0-6min                    | 81.5 ± 58.4                                                           | 16 | 80.8 ± 40.4    | 15 | 44.1 ± 39.3    | 8 | 34.5 ± 39.2    | 11 | t 0.9666        | t 0.0781        | U <b>0.0088</b> | U 0.5302        |
| <b>Hot Plate</b>                                   |                                                                       |    |                |    |                |   |                |    |                 |                 |                 |                 |
| Latency to first reaction to heat [s]              | 12.9 ± 1.7                                                            | 16 | 12.6 ± 1.8     | 15 | 18.2 ± 4.4     | 8 | 13.5 ± 1.5     | 11 | t 0.6318        | t <b>0.0105</b> | t 0.1812        | t <b>0.0185</b> |
| Latency to first reaction to heat [s]              | 2way ANOVA Genotype: p=0.0003 Treatment: p=0.0093                     |    |                |    |                |   |                |    |                 |                 |                 |                 |

| P value | avg_log2FC  | Percent of cells (corresponding cell type) | Percent of cells (rest of the cell types) | Adjusted p value | Celltype | Genes    |
|---------|-------------|--------------------------------------------|-------------------------------------------|------------------|----------|----------|
| 0       | 3,619508138 | 0,993                                      | 0,21                                      | 0                | OPC1     | Lhfp13   |
| 0       | 2,30306798  | 0,947                                      | 0,141                                     | 0                | OPC1     | Nxph1    |
| 0       | 2,1644994   | 0,95                                       | 0,176                                     | 0                | OPC1     | Sox6     |
| 0       | 2,124896774 | 0,843                                      | 0,022                                     | 0                | OPC1     | Pdgfra   |
| 0       | 2,120186263 | 0,981                                      | 0,313                                     | 0                | OPC1     | Ptprz1   |
| 0       | 2,075370643 | 0,97                                       | 0,312                                     | 0                | OPC1     | Sox2ot   |
| 0       | 2,034324342 | 0,979                                      | 0,584                                     | 0                | OPC1     | Xylt1    |
| 0       | 2,034125695 | 0,998                                      | 0,854                                     | 0                | OPC1     | Tnr      |
| 0       | 2,005397581 | 0,994                                      | 0,567                                     | 0                | OPC1     | Pcdh15   |
| 0       | 1,888371554 | 0,806                                      | 0,061                                     | 0                | OPC1     | Vcan     |
| 0       | 1,868812382 | 0,965                                      | 0,565                                     | 0                | OPC1     | Epn2     |
| 0       | 1,852406295 | 0,998                                      | 0,887                                     | 0                | OPC1     | Dscam    |
| 0       | 1,755164675 | 1                                          | 0,904                                     | 0                | OPC1     | Lrrc4c   |
| 0       | 1,661358377 | 0,768                                      | 0,093                                     | 0                | OPC1     | Gm38505  |
| 0       | 1,628564082 | 0,772                                      | 0,112                                     | 0                | OPC1     | Gm4876   |
| 0       | 1,619487222 | 0,815                                      | 0,135                                     | 0                | OPC1     | Arhgap31 |
| 0       | 1,565790301 | 0,963                                      | 0,438                                     | 0                | OPC1     | Brinp3   |
| 0       | 1,546771828 | 0,958                                      | 0,632                                     | 0                | OPC1     | Zeb1     |
| 0       | 1,535423697 | 0,998                                      | 0,77                                      | 0                | OPC1     | Grid2    |
| 0       | 1,491439718 | 0,702                                      | 0,04                                      | 0                | OPC1     | Cacng4   |
| 0       | 1,473644057 | 0,987                                      | 0,543                                     | 0                | OPC1     | Gpc5     |
| 0       | 1,352864596 | 0,969                                      | 0,537                                     | 0                | OPC1     | Luzp2    |
| 0       | 1,30914908  | 0,922                                      | 0,513                                     | 0                | OPC1     | Slc35f1  |
| 0       | 1,306752551 | 0,678                                      | 0,11                                      | 0                | OPC1     | Megf11   |
| 0       | 1,272894814 | 0,818                                      | 0,26                                      | 0                | OPC1     | Cspg5    |
| 0       | 1,272795787 | 0,768                                      | 0,278                                     | 0                | OPC1     | Pcdh11x  |
| 0       | 1,266495117 | 0,811                                      | 0,399                                     | 0                | OPC1     | Mir9-3hg |
| 0       | 1,215964109 | 0,669                                      | 0,109                                     | 0                | OPC1     | Ppfbp1   |
| 0       | 1,184312    | 0,864                                      | 0,388                                     | 0                | OPC1     | Nckap5   |
| 0       | 1,182732397 | 0,971                                      | 0,436                                     | 0                | OPC1     | Npas3    |
| 0       | 1,141663139 | 0,82                                       | 0,405                                     | 0                | OPC1     | Fchs2    |
| 0       | 1,136029141 | 0,949                                      | 0,489                                     | 0                | OPC1     | Ptprt    |
| 0       | 1,109060211 | 0,959                                      | 0,652                                     | 0                | OPC1     | Sgcd     |
| 0       | 1,104303783 | 0,731                                      | 0,319                                     | 0                | OPC1     | Chst11   |
| 0       | 1,081968192 | 0,811                                      | 0,471                                     | 0                | OPC1     | Usp24    |
| 0       | 1,077151747 | 0,951                                      | 0,543                                     | 0                | OPC1     | Maml2    |
| 0       | 1,067113556 | 0,76                                       | 0,413                                     | 0                | OPC1     | Kcnip3   |
| 0       | 1,061406098 | 0,674                                      | 0,202                                     | 0                | OPC1     | Grin3a   |
| 0       | 1,04893399  | 0,525                                      | 0,028                                     | 0                | OPC1     | Stk32a   |
| 0       | 1,044231273 | 0,58                                       | 0,086                                     | 0                | OPC1     | Abtb2    |
| 0       | 1,035659326 | 0,828                                      | 0,443                                     | 0                | OPC1     | Sh3d19   |
| 0       | 1,026696461 | 0,651                                      | 0,115                                     | 0                | OPC1     | Sox10    |

|   |             |       |       |   |      |          |
|---|-------------|-------|-------|---|------|----------|
| 0 | 1,025818687 | 0,974 | 0,367 | 0 | OPC1 | Erb4     |
| 0 | 1,022116357 | 0,914 | 0,728 | 0 | OPC1 | Rev3l    |
| 0 | 1,0216958   | 0,903 | 0,557 | 0 | OPC1 | Sox5     |
| 0 | 1,017092198 | 0,842 | 0,485 | 0 | OPC1 | Dpyd     |
| 0 | 1,01181915  | 0,52  | 0,035 | 0 | OPC1 | Kcnh8    |
| 0 | 1,010780099 | 0,644 | 0,139 | 0 | OPC1 | Itpr2    |
| 0 | 1,010042964 | 0,743 | 0,384 | 0 | OPC1 | Zfp462   |
| 0 | 1,007246525 | 0,82  | 0,484 | 0 | OPC1 | Pid1     |
| 0 | 1,002371001 | 0,522 | 0,03  | 0 | OPC1 | Emid1    |
| 0 | 0,999923395 | 0,561 | 0,113 | 0 | OPC1 | Unc13c   |
| 0 | 0,989150316 | 0,575 | 0,115 | 0 | OPC1 | Myt1     |
| 0 | 0,978663047 | 0,585 | 0,142 | 0 | OPC1 | Adam12   |
| 0 | 0,969534942 | 0,508 | 0,041 | 0 | OPC1 | Sema3d   |
| 0 | 0,967685388 | 0,968 | 0,729 | 0 | OPC1 | Sema6d   |
| 0 | 0,966326531 | 0,998 | 0,973 | 0 | OPC1 | Csmd3    |
| 0 | 0,963547872 | 0,637 | 0,149 | 0 | OPC1 | Bcas1    |
| 0 | 0,948230549 | 0,811 | 0,349 | 0 | OPC1 | Sorcs1   |
| 0 | 0,933244687 | 0,71  | 0,405 | 0 | OPC1 | Gm32509  |
| 0 | 0,897027931 | 0,55  | 0,089 | 0 | OPC1 | Kank1    |
| 0 | 0,895697254 | 0,617 | 0,238 | 0 | OPC1 | Nova1    |
| 0 | 0,890605344 | 0,592 | 0,16  | 0 | OPC1 | Mtss2    |
| 0 | 0,884095778 | 0,663 | 0,289 | 0 | OPC1 | Srgap1   |
| 0 | 0,87802334  | 0,802 | 0,582 | 0 | OPC1 | Cask     |
| 0 | 0,873053456 | 0,581 | 0,142 | 0 | OPC1 | Wipf1    |
| 0 | 0,866569402 | 0,57  | 0,135 | 0 | OPC1 | Serpine2 |
| 0 | 0,856341054 | 0,98  | 0,921 | 0 | OPC1 | Cntn1    |
| 0 | 0,85101193  | 0,979 | 0,554 | 0 | OPC1 | Qk       |
| 0 | 0,850174378 | 0,701 | 0,304 | 0 | OPC1 | Tmem132d |
| 0 | 0,849510917 | 0,574 | 0,236 | 0 | OPC1 | Plppr1   |
| 0 | 0,845225856 | 0,894 | 0,605 | 0 | OPC1 | Gm3764   |
| 0 | 0,832195439 | 0,718 | 0,413 | 0 | OPC1 | Nrxn2    |
| 0 | 0,826425646 | 0,615 | 0,193 | 0 | OPC1 | Bcan     |
| 0 | 0,818366459 | 0,999 | 0,963 | 0 | OPC1 | Il1rap1  |
| 0 | 0,808541596 | 0,936 | 0,657 | 0 | OPC1 | Astn2    |
| 0 | 0,788374083 | 0,995 | 0,913 | 0 | OPC1 | Rora     |
| 0 | 0,787510552 | 0,88  | 0,653 | 0 | OPC1 | Klf12    |
| 0 | 0,782204466 | 0,774 | 0,336 | 0 | OPC1 | Cdh13    |
| 0 | 0,770947987 | 0,698 | 0,339 | 0 | OPC1 | Pde7b    |
| 0 | 0,769878067 | 0,998 | 0,988 | 0 | OPC1 | Anks1b   |
| 0 | 0,767680625 | 0,836 | 0,405 | 0 | OPC1 | Gpc6     |
| 0 | 0,764080964 | 0,668 | 0,355 | 0 | OPC1 | Spon1    |
| 0 | 0,763760487 | 0,784 | 0,526 | 0 | OPC1 | Ncald    |
| 0 | 0,754457016 | 0,988 | 0,912 | 0 | OPC1 | 01. Mrz  |

|   |             |       |       |   |      |               |
|---|-------------|-------|-------|---|------|---------------|
| 0 | 0,754211036 | 0,814 | 0,626 | 0 | OPC1 | Nav1          |
| 0 | 0,743205463 | 0,609 | 0,285 | 0 | OPC1 | Hip1          |
| 0 | 0,736703725 | 0,844 | 0,7   | 0 | OPC1 | Ankrd11       |
| 0 | 0,730726456 | 0,625 | 0,229 | 0 | OPC1 | Dock1         |
| 0 | 0,729459945 | 0,999 | 0,988 | 0 | OPC1 | Ctnna2        |
| 0 | 0,718686777 | 0,573 | 0,193 | 0 | OPC1 | Gm20713       |
| 0 | 0,718503445 | 0,928 | 0,506 | 0 | OPC1 | Gm42418       |
| 0 | 0,7162523   | 0,999 | 0,989 | 0 | OPC1 | Mdga2         |
| 0 | 0,710357055 | 0,713 | 0,346 | 0 | OPC1 | Cdh20         |
| 0 | 0,708221466 | 0,994 | 0,831 | 0 | OPC1 | Ncam2         |
| 0 | 0,70035168  | 0,568 | 0,212 | 0 | OPC1 | Chd7          |
| 0 | 0,697511598 | 1     | 0,986 | 0 | OPC1 | Nlgn1         |
| 0 | 0,696682652 | 0,953 | 0,716 | 0 | OPC1 | Pcdh7         |
| 0 | 0,695739312 | 0,992 | 0,978 | 0 | OPC1 | Nav3          |
| 0 | 0,691720836 | 0,827 | 0,624 | 0 | OPC1 | Agap1         |
| 0 | 0,684457132 | 0,922 | 0,663 | 0 | OPC1 | Dnm3          |
| 0 | 0,682998322 | 1     | 0,991 | 0 | OPC1 | Nrxn1         |
| 0 | 0,673450681 | 0,982 | 0,955 | 0 | OPC1 | Sntg1         |
| 0 | 0,673184261 | 0,538 | 0,141 | 0 | OPC1 | Gjc3          |
| 0 | 0,664924398 | 0,925 | 0,793 | 0 | OPC1 | Csmd2         |
| 0 | 0,655548134 | 1     | 0,965 | 0 | OPC1 | Lrp1b         |
| 0 | 0,655044289 | 0,953 | 0,857 | 0 | OPC1 | Mmp16         |
| 0 | 0,654405555 | 1     | 0,988 | 0 | OPC1 | Lsamp         |
| 0 | 0,64438089  | 0,965 | 0,885 | 0 | OPC1 | Grid1         |
| 0 | 0,643522937 | 0,523 | 0,269 | 0 | OPC1 | Snx25         |
| 0 | 0,640991607 | 0,933 | 0,459 | 0 | OPC1 | Adarb2        |
| 0 | 0,63504977  | 0,513 | 0,265 | 0 | OPC1 | Abhd2         |
| 0 | 0,626598044 | 0,967 | 0,843 | 0 | OPC1 | Dscam11       |
| 0 | 0,618232357 | 0,99  | 0,892 | 0 | OPC1 | Dcc           |
| 0 | 0,612712024 | 0,995 | 0,962 | 0 | OPC1 | Adgrl3        |
| 0 | 0,612205162 | 0,5   | 0,25  | 0 | OPC1 | Evi5l         |
| 0 | 0,606858519 | 0,649 | 0,435 | 0 | OPC1 | 2610035D17Rik |
| 0 | 0,593170755 | 0,729 | 0,561 | 0 | OPC1 | Phactr3       |
| 0 | 0,588059274 | 0,989 | 0,949 | 0 | OPC1 | Nav2          |
| 0 | 0,587883927 | 0,992 | 0,806 | 0 | OPC1 | Ntm           |
| 0 | 0,587283508 | 0,536 | 0,252 | 0 | OPC1 | Cobl          |
| 0 | 0,583829657 | 0,996 | 0,973 | 0 | OPC1 | Kcnd2         |
| 0 | 0,583704541 | 0,783 | 0,547 | 0 | OPC1 | Lrrtm3        |
| 0 | 0,580935406 | 0,824 | 0,616 | 0 | OPC1 | Alcam         |
| 0 | 0,569635962 | 0,52  | 0,201 | 0 | OPC1 | Cntn6         |
| 0 | 0,565069145 | 0,913 | 0,639 | 0 | OPC1 | Cntn4         |
| 0 | 0,557224362 | 0,584 | 0,324 | 0 | OPC1 | Kif13a        |
| 0 | 0,549902535 | 0,623 | 0,292 | 0 | OPC1 | Tox           |

|           |             |       |       |           |      |           |
|-----------|-------------|-------|-------|-----------|------|-----------|
| 0         | 0,53782072  | 0,951 | 0,856 | 0         | OPC1 | Ptprg     |
| 0         | 0,535513255 | 0,525 | 0,249 | 0         | OPC1 | Sdk1      |
| 0         | 0,526646808 | 0,61  | 0,32  | 0         | OPC1 | Sema5a    |
| 0         | 0,526523617 | 0,898 | 0,779 | 0         | OPC1 | Hnrnpa2b1 |
| 0         | 0,510657665 | 0,534 | 0,214 | 0         | OPC1 | Phldb1    |
| 0         | 0,505174485 | 0,99  | 0,911 | 0         | OPC1 | Ncam1     |
| 9,92E-303 | 0,59687226  | 0,523 | 0,305 | 2,67E-298 | OPC1 | Tpm1      |
| 3,61E-293 | 0,545152045 | 0,647 | 0,393 | 9,73E-289 | OPC1 | Inpp4b    |
| 2,17E-270 | 0,538243619 | 0,949 | 0,831 | 5,83E-266 | OPC1 | Ppp2r2b   |
| 2,47E-252 | 0,534418271 | 0,707 | 0,559 | 6,66E-248 | OPC1 | Ankrd28   |
| 2,48E-243 | 0,528817734 | 0,756 | 0,622 | 6,68E-239 | OPC1 | Galnt13   |
| 8,70E-216 | 0,508471091 | 0,506 | 0,326 | 2,34E-211 | OPC1 | Fip11f    |
| 4,17E-200 | 0,536893693 | 0,534 | 0,374 | 1,12E-195 | OPC1 | Scfd2     |
| 7,44E-193 | 0,512569828 | 0,642 | 0,509 | 2,00E-188 | OPC1 | Nmnat2    |

|           |             |       |       |           |      |            |
|-----------|-------------|-------|-------|-----------|------|------------|
| 0         | 2,658683144 | 0,562 | 0,162 | 0         | OPC2 | Bcas1      |
| 0         | 2,324716    | 0,971 | 0,858 | 0         | OPC2 | Tnr        |
| 0         | 2,222066014 | 0,833 | 0,536 | 0         | OPC2 | Fyn        |
| 0         | 1,967645691 | 0,681 | 0,124 | 0         | OPC2 | Tcf7l2     |
| 0         | 1,962315688 | 0,599 | 0,141 | 0         | OPC2 | Tns3       |
| 0         | 1,704365535 | 0,779 | 0,197 | 0         | OPC2 | Sox6       |
| 0         | 1,596107358 | 0,548 | 0,125 | 0         | OPC2 | Ppfbp1     |
| 0         | 1,586820411 | 0,664 | 0,151 | 0         | OPC2 | Itpr2      |
| 0         | 1,580237597 | 0,949 | 0,706 | 0         | OPC2 | Tmem108    |
| 0         | 1,554563386 | 0,575 | 0,165 | 0         | OPC2 | Epb41l2    |
| 0         | 1,455307887 | 0,834 | 0,399 | 0         | OPC2 | Nckap5     |
| 0         | 1,419774304 | 0,858 | 0,323 | 0         | OPC2 | Sema5a     |
| 0         | 1,367841327 | 0,979 | 0,564 | 0         | OPC2 | Qk         |
| 0         | 1,366454872 | 0,61  | 0,216 | 0         | OPC2 | Sirt2      |
| 0         | 1,338744582 | 0,608 | 0,182 | 0         | OPC2 | Mpz1l      |
| 0         | 1,296882949 | 0,504 | 0,099 | 0         | OPC2 | Abtb2      |
| 0         | 1,153223771 | 0,938 | 0,553 | 0         | OPC2 | Maml2      |
| 0         | 1,016971415 | 0,801 | 0,334 | 0         | OPC2 | St18       |
| 0         | 0,995616126 | 0,733 | 0,322 | 0         | OPC2 | Csgalnact1 |
| 0         | 0,993534061 | 0,632 | 0,242 | 0         | OPC2 | Ptpro      |
| 0         | 0,844688884 | 0,558 | 0,1   | 0         | OPC2 | Kank1      |
| 0         | 0,814617757 | 0,67  | 0,202 | 0         | OPC2 | Bcan       |
| 0         | 0,580925873 | 0,562 | 0,161 | 0         | OPC2 | Plpp3      |
| 4,96E-300 | 0,75583366  | 0,782 | 0,332 | 1,34E-295 | OPC2 | Ptprz1     |
| 4,78E-280 | 1,570937978 | 0,791 | 0,454 | 1,29E-275 | OPC2 | Ust        |
| 2,32E-273 | 1,280434368 | 0,913 | 0,776 | 6,24E-269 | OPC2 | Ptprj      |
| 3,56E-270 | 0,738633808 | 0,717 | 0,304 | 9,58E-266 | OPC2 | Stard13    |
| 2,70E-243 | 0,721685577 | 0,59  | 0,206 | 7,27E-239 | OPC2 | Plp1       |

|           |             |       |       |           |      |               |
|-----------|-------------|-------|-------|-----------|------|---------------|
| 2,81E-239 | 0,623881401 | 0,561 | 0,212 | 7,56E-235 | OPC2 | Cald1         |
| 9,59E-235 | 1,06761718  | 0,74  | 0,355 | 2,58E-230 | OPC2 | Cdh20         |
| 2,89E-228 | 1,150415831 | 0,735 | 0,418 | 7,79E-224 | OPC2 | Chd3          |
| 1,61E-224 | 0,554585933 | 0,591 | 0,231 | 4,33E-220 | OPC2 | Acsi3         |
| 4,48E-220 | 0,836530138 | 0,652 | 0,316 | 1,21E-215 | OPC2 | Phyhip1       |
| 8,14E-220 | 0,744871787 | 0,793 | 0,455 | 2,19E-215 | OPC2 | Arhgap5       |
| 1,30E-215 | 0,583597479 | 0,863 | 0,575 | 3,51E-211 | OPC2 | Msi2          |
| 6,05E-215 | 0,885213445 | 0,984 | 0,835 | 1,63E-210 | OPC2 | Ncam2         |
| 2,65E-210 | 0,852557054 | 0,841 | 0,549 | 7,13E-206 | OPC2 | Luzp2         |
| 1,09E-208 | 2,039413031 | 0,99  | 0,979 | 2,94E-204 | OPC2 | Frdm4a        |
| 9,52E-207 | 0,932674041 | 0,651 | 0,359 | 2,56E-202 | OPC2 | Rapgef1       |
| 3,26E-196 | 0,911946854 | 0,735 | 0,435 | 8,78E-192 | OPC2 | Lcor1         |
| 1,24E-194 | 0,913097755 | 0,667 | 0,374 | 3,33E-190 | OPC2 | Arhgap35      |
| 1,54E-194 | 0,927950662 | 0,977 | 0,911 | 4,14E-190 | OPC2 | Cdk14         |
| 1,56E-189 | 0,865037657 | 0,965 | 0,89  | 4,19E-185 | OPC2 | Dscam         |
| 9,44E-188 | 0,753632211 | 0,962 | 0,889 | 2,54E-183 | OPC2 | Map1b         |
| 4,38E-183 | 0,737306622 | 0,768 | 0,462 | 1,18E-178 | OPC2 | Gm35188       |
| 1,89E-170 | 0,676087576 | 0,737 | 0,43  | 5,09E-166 | OPC2 | Pcdh17        |
| 5,39E-169 | 1,212112893 | 0,651 | 0,334 | 1,45E-164 | OPC2 | Mbp           |
| 8,12E-168 | 0,518217824 | 0,529 | 0,221 | 2,19E-163 | OPC2 | Chd7          |
| 2,41E-165 | 0,980082532 | 0,669 | 0,405 | 6,49E-161 | OPC2 | Slc22a23      |
| 7,92E-161 | 0,572106715 | 0,505 | 0,228 | 2,13E-156 | OPC2 | Klh5          |
| 2,51E-158 | 1,041646637 | 0,67  | 0,422 | 6,77E-154 | OPC2 | Pdcd4         |
| 3,88E-156 | 1,663792875 | 0,507 | 0,263 | 1,05E-151 | OPC2 | Pik3r3        |
| 9,82E-156 | 0,584005496 | 0,653 | 0,36  | 2,65E-151 | OPC2 | Ptpre         |
| 3,10E-152 | 0,607333944 | 0,52  | 0,229 | 8,36E-148 | OPC2 | Slc1a3        |
| 3,38E-148 | 0,836717639 | 0,696 | 0,439 | 9,10E-144 | OPC2 | 2610035D17Rik |
| 1,12E-143 | 0,761595314 | 0,684 | 0,436 | 3,01E-139 | OPC2 | Rictor        |
| 3,09E-143 | 0,655988888 | 1     | 0,991 | 8,32E-139 | OPC2 | Cadm2         |
| 1,34E-142 | 0,541837829 | 0,716 | 0,402 | 3,61E-138 | OPC2 | Thsd7a        |
| 8,42E-140 | 0,645278162 | 0,653 | 0,349 | 2,27E-135 | OPC2 | Cdh13         |
| 2,09E-139 | 0,78861405  | 0,698 | 0,452 | 5,62E-135 | OPC2 | Lrch3         |
| 3,97E-138 | 0,794500829 | 0,792 | 0,622 | 1,07E-133 | OPC2 | Slc44a1       |
| 4,25E-138 | 0,764442516 | 0,681 | 0,431 | 1,14E-133 | OPC2 | Slc1a1        |
| 7,32E-137 | 0,894498872 | 0,552 | 0,305 | 1,97E-132 | OPC2 | Sema4d        |
| 8,41E-137 | 0,518956413 | 0,545 | 0,249 | 2,27E-132 | OPC2 | Plekhg1       |
| 4,84E-134 | 0,765169439 | 0,766 | 0,529 | 1,30E-129 | OPC2 | Map4k4        |
| 1,19E-127 | 0,714984181 | 0,992 | 0,935 | 3,21E-123 | OPC2 | Dock4         |
| 4,48E-124 | 0,75217633  | 0,544 | 0,301 | 1,21E-119 | OPC2 | Etv6          |
| 2,35E-122 | 0,764181541 | 0,688 | 0,454 | 6,32E-118 | OPC2 | Sh3d19        |
| 1,20E-121 | 0,674064002 | 0,944 | 0,776 | 3,22E-117 | OPC2 | Grid2         |
| 1,49E-117 | 0,537276743 | 0,945 | 0,887 | 4,01E-113 | OPC2 | Grid1         |
| 4,10E-117 | 0,704526198 | 0,976 | 0,913 | 1,10E-112 | OPC2 | Ncam1         |

|           |             |       |       |           |      |               |
|-----------|-------------|-------|-------|-----------|------|---------------|
| 8,27E-117 | 0,659497106 | 0,582 | 0,318 | 2,23E-112 | OPC2 | Glis3         |
| 3,55E-115 | 0,994094541 | 0,856 | 0,723 | 9,56E-111 | OPC2 | Pcdh7         |
| 4,57E-115 | 1,812457348 | 0,811 | 0,721 | 1,23E-110 | OPC2 | Nfasc         |
| 1,04E-113 | 0,603475205 | 0,668 | 0,417 | 2,81E-109 | OPC2 | Fchsd2        |
| 2,39E-111 | 0,54253035  | 0,545 | 0,3   | 6,44E-107 | OPC2 | Prx2          |
| 2,74E-111 | 0,514451814 | 0,775 | 0,556 | 7,38E-107 | OPC2 | Gpc5          |
| 1,29E-109 | 0,968061227 | 0,82  | 0,671 | 3,46E-105 | OPC2 | Dnm3          |
| 1,47E-101 | 0,668306207 | 0,82  | 0,68  | 3,95E-97  | OPC2 | Fmnl2         |
| 3,31E-101 | 0,614524963 | 0,55  | 0,338 | 8,92E-97  | OPC2 | Camsap2       |
| 1,16E-100 | 0,666739651 | 0,55  | 0,327 | 3,14E-96  | OPC2 | Mitf          |
| 2,77E-98  | 0,546524285 | 0,988 | 0,894 | 7,45E-94  | OPC2 | Zeb2          |
| 4,42E-96  | 0,537970446 | 0,962 | 0,815 | 1,19E-91  | OPC2 | Kirrel3       |
| 1,95E-95  | 0,516604418 | 0,719 | 0,554 | 5,26E-91  | OPC2 | Slc1a2        |
| 2,53E-93  | 0,569959333 | 0,564 | 0,358 | 6,81E-89  | OPC2 | Ccser2        |
| 6,65E-92  | 0,527574519 | 0,622 | 0,39  | 1,79E-87  | OPC2 | Prkd1         |
| 2,24E-91  | 0,663043377 | 0,963 | 0,95  | 6,02E-87  | OPC2 | Nav2          |
| 3,77E-87  | 0,513144662 | 0,608 | 0,4   | 1,02E-82  | OPC2 | Ophn1         |
| 4,51E-86  | 0,541861449 | 0,585 | 0,388 | 1,21E-81  | OPC2 | D630045J12Rik |
| 1,18E-83  | 0,529748194 | 0,632 | 0,405 | 3,18E-79  | OPC2 | Stxbp6        |
| 3,46E-83  | 0,560881728 | 0,915 | 0,878 | 9,33E-79  | OPC2 | Trio          |
| 3,74E-83  | 0,952285436 | 0,997 | 0,984 | 1,01E-78  | OPC2 | Opcm1         |
| 9,92E-83  | 0,717685185 | 0,761 | 0,643 | 2,67E-78  | OPC2 | Rfx3          |
| 1,29E-82  | 0,506816388 | 0,55  | 0,351 | 3,47E-78  | OPC2 | 4430402118Rik |
| 9,76E-82  | 0,5143872   | 0,638 | 0,424 | 2,63E-77  | OPC2 | Pacrg         |
| 3,79E-80  | 0,658204288 | 0,713 | 0,563 | 1,02E-75  | OPC2 | Ankrd28       |
| 5,56E-79  | 0,641804776 | 0,712 | 0,524 | 1,50E-74  | OPC2 | Fam13c        |
| 9,24E-77  | 1,216033432 | 0,77  | 0,758 | 2,49E-72  | OPC2 | 9530059O14Rik |
| 6,23E-76  | 0,702953169 | 0,666 | 0,512 | 1,68E-71  | OPC2 | Slc4a4        |
| 2,97E-73  | 0,519899189 | 0,708 | 0,532 | 8,01E-69  | OPC2 | Cdc3711       |
| 1,42E-72  | 0,542842562 | 0,757 | 0,612 | 3,82E-68  | OPC2 | Ago3          |
| 1,51E-70  | 0,52234782  | 0,928 | 0,847 | 4,08E-66  | OPC2 | Dscam11       |
| 1,17E-69  | 0,595418134 | 0,743 | 0,631 | 3,16E-65  | OPC2 | Nav1          |
| 4,47E-67  | 0,621411411 | 0,542 | 0,343 | 1,21E-62  | OPC2 | Ephb1         |
| 2,19E-63  | 0,589561395 | 0,716 | 0,588 | 5,90E-59  | OPC2 | Cask          |
| 7,40E-58  | 0,81304848  | 0,735 | 0,674 | 1,99E-53  | OPC2 | Zdhhc14       |
| 1,47E-52  | 0,583495755 | 0,756 | 0,732 | 3,97E-48  | OPC2 | Ahcy12        |
| 1,53E-40  | 0,566509404 | 0,75  | 0,717 | 4,13E-36  | OPC2 | Mical3        |
| 5,18E-32  | 0,550117095 | 0,511 | 0,411 | 1,40E-27  | OPC2 | Sh3rf1        |

|   |             |       |       |   |        |       |
|---|-------------|-------|-------|---|--------|-------|
| 0 | 1,61442914  | 0,99  | 0,325 | 0 | Oligo1 | Mbp   |
| 0 | 1,532092957 | 0,971 | 0,196 | 0 | Oligo1 | Plp1  |
| 0 | 1,493990476 | 0,975 | 0,327 | 0 | Oligo1 | St18  |
| 0 | 1,404598079 | 0,917 | 0,175 | 0 | Oligo1 | Prr5l |

|   |             |       |       |   |        |           |
|---|-------------|-------|-------|---|--------|-----------|
| 0 | 1,336807367 | 0,99  | 0,534 | 0 | Oligo1 | Dock10    |
| 0 | 1,319956704 | 0,916 | 0,3   | 0 | Oligo1 | Rnf220    |
| 0 | 1,285151211 | 0,998 | 0,733 | 0 | Oligo1 | Pde4b     |
| 0 | 1,199927847 | 0,817 | 0,148 | 0 | Oligo1 | Mobp      |
| 0 | 1,154510845 | 0,853 | 0,154 | 0 | Oligo1 | Mag       |
| 0 | 1,149161613 | 0,996 | 0,867 | 0 | Oligo1 | Tmeff2    |
| 0 | 1,138911959 | 0,995 | 0,645 | 0 | Oligo1 | Plcl1     |
| 0 | 1,134497872 | 0,991 | 0,561 | 0 | Oligo1 | Qk        |
| 0 | 1,114654366 | 0,795 | 0,145 | 0 | Oligo1 | Mog       |
| 0 | 1,113012029 | 0,806 | 0,149 | 0 | Oligo1 | Trf       |
| 0 | 1,074527227 | 0,772 | 0,141 | 0 | Oligo1 | Aspa      |
| 0 | 1,028123083 | 0,979 | 0,711 | 0 | Oligo1 | Phlpp1    |
| 0 | 1,003778389 | 0,979 | 0,683 | 0 | Oligo1 | Fnbp1     |
| 0 | 1,002172703 | 0,544 | 0,176 | 0 | Oligo1 | Apoe      |
| 0 | 1,001715357 | 0,926 | 0,376 | 0 | Oligo1 | Zfp536    |
| 0 | 0,995560513 | 0,762 | 0,238 | 0 | Oligo1 | Gm16168   |
| 0 | 0,991724922 | 0,67  | 0,224 | 0 | Oligo1 | Slc1a3    |
| 0 | 0,976966541 | 0,809 | 0,213 | 0 | Oligo1 | Phldb1    |
| 0 | 0,954567248 | 0,82  | 0,276 | 0 | Oligo1 | Erbin     |
| 0 | 0,929850634 | 0,827 | 0,314 | 0 | Oligo1 | Cdk19     |
| 0 | 0,924906819 | 0,707 | 0,135 | 0 | Oligo1 | D7Erd443e |
| 0 | 0,915794285 | 0,917 | 0,556 | 0 | Oligo1 | Grm3      |
| 0 | 0,908572429 | 0,902 | 0,473 | 0 | Oligo1 | 07. Sep   |
| 0 | 0,904209947 | 0,831 | 0,4   | 0 | Oligo1 | Stxbp6    |
| 0 | 0,898828616 | 0,857 | 0,253 | 0 | Oligo1 | Enpp2     |
| 0 | 0,888489861 | 0,814 | 0,313 | 0 | Oligo1 | Tubb4a    |
| 0 | 0,888005399 | 0,685 | 0,13  | 0 | Oligo1 | Ugt8a     |
| 0 | 0,884511058 | 0,647 | 0,194 | 0 | Oligo1 | Lama2     |
| 0 | 0,88098901  | 0,73  | 0,144 | 0 | Oligo1 | Gjc3      |
| 0 | 0,872165775 | 0,909 | 0,506 | 0 | Oligo1 | Slc4a4    |
| 0 | 0,871695186 | 0,681 | 0,124 | 0 | Oligo1 | Sec14l5   |
| 0 | 0,868803542 | 0,644 | 0,162 | 0 | Oligo1 | Neat1     |
| 0 | 0,868059822 | 0,893 | 0,497 | 0 | Oligo1 | Frm4b     |
| 0 | 0,868054464 | 0,687 | 0,164 | 0 | Oligo1 | Car2      |
| 0 | 0,86529292  | 0,683 | 0,128 | 0 | Oligo1 | Fa2h      |
| 0 | 0,86331324  | 0,824 | 0,358 | 0 | Oligo1 | Arhgap23  |
| 0 | 0,85816709  | 0,763 | 0,282 | 0 | Oligo1 | Ypel2     |
| 0 | 0,847227467 | 0,669 | 0,296 | 0 | Oligo1 | Prex2     |
| 0 | 0,843545928 | 0,988 | 0,754 | 0 | Oligo1 | Frm5      |
| 0 | 0,838893889 | 0,951 | 0,684 | 0 | Oligo1 | Map7      |
| 0 | 0,836876946 | 0,693 | 0,183 | 0 | Oligo1 | Gab1      |
| 0 | 0,836645722 | 0,669 | 0,137 | 0 | Oligo1 | Pde8a     |
| 0 | 0,831521969 | 0,666 | 0,176 | 0 | Oligo1 | Daam2     |

|   |             |       |       |   |        |               |
|---|-------------|-------|-------|---|--------|---------------|
| 0 | 0,829522345 | 0,985 | 0,861 | 0 | Oligo1 | Mast4         |
| 0 | 0,825407689 | 0,721 | 0,243 | 0 | Oligo1 | Plekhg1       |
| 0 | 0,823535749 | 0,633 | 0,138 | 0 | Oligo1 | Cdh19         |
| 0 | 0,818314101 | 0,517 | 0,16  | 0 | Oligo1 | Ppp3          |
| 0 | 0,812755799 | 0,624 | 0,12  | 0 | Oligo1 | Tspan2        |
| 0 | 0,802299715 | 0,97  | 0,763 | 0 | Oligo1 | St6galnac3    |
| 0 | 0,800585419 | 0,605 | 0,103 | 0 | Oligo1 | C030029H02Rik |
| 0 | 0,797879095 | 0,787 | 0,352 | 0 | Oligo1 | Ppp1r16b      |
| 0 | 0,797607672 | 0,654 | 0,121 | 0 | Oligo1 | Plekhh1       |
| 0 | 0,794385018 | 0,997 | 0,983 | 0 | Oligo1 | Nkain2        |
| 0 | 0,789331373 | 0,98  | 0,722 | 0 | Oligo1 | Edil3         |
| 0 | 0,789142154 | 0,759 | 0,312 | 0 | Oligo1 | Glis3         |
| 0 | 0,781360079 | 0,597 | 0,105 | 0 | Oligo1 | 1700047M11Rik |
| 0 | 0,777135346 | 0,942 | 0,55  | 0 | Oligo1 | Maml2         |
| 0 | 0,771810077 | 0,694 | 0,192 | 0 | Oligo1 | 04. Sep       |
| 0 | 0,770417399 | 0,734 | 0,155 | 0 | Oligo1 | Bcas1         |
| 0 | 0,765929699 | 0,784 | 0,352 | 0 | Oligo1 | Aatk          |
| 0 | 0,763475646 | 0,574 | 0,095 | 0 | Oligo1 | Opalin        |
| 0 | 0,762127009 | 0,742 | 0,316 | 0 | Oligo1 | Clmn          |
| 0 | 0,758119162 | 0,653 | 0,143 | 0 | Oligo1 | Gatm          |
| 0 | 0,734494175 | 0,977 | 0,723 | 0 | Oligo1 | Nfia          |
| 0 | 0,732626299 | 0,613 | 0,132 | 0 | Oligo1 | Ccp110        |
| 0 | 0,729380787 | 0,952 | 0,774 | 0 | Oligo1 | Dtna          |
| 0 | 0,722220826 | 0,532 | 0,096 | 0 | Oligo1 | Ninj2         |
| 0 | 0,721360215 | 0,616 | 0,19  | 0 | Oligo1 | Syt12         |
| 0 | 0,711712676 | 0,997 | 0,944 | 0 | Oligo1 | Slc24a2       |
| 0 | 0,705429064 | 0,584 | 0,157 | 0 | Oligo1 | Hepacam       |
| 0 | 0,700436331 | 0,665 | 0,235 | 0 | Oligo1 | Dock1         |
| 0 | 0,700097669 | 0,895 | 0,325 | 0 | Oligo1 | Sox2ot        |
| 0 | 0,69364349  | 0,748 | 0,329 | 0 | Oligo1 | Ptprz1        |
| 0 | 0,690311959 | 0,587 | 0,134 | 0 | Oligo1 | Creb5         |
| 0 | 0,677183523 | 0,945 | 0,668 | 0 | Oligo1 | Dnm3          |
| 0 | 0,676001708 | 0,782 | 0,44  | 0 | Oligo1 | Pak1          |
| 0 | 0,66318701  | 0,773 | 0,385 | 0 | Oligo1 | Prkd1         |
| 0 | 0,663039685 | 0,709 | 0,326 | 0 | Oligo1 | Kif13a        |
| 0 | 0,657098844 | 0,642 | 0,246 | 0 | Oligo1 | Rab31         |
| 0 | 0,655330146 | 0,651 | 0,269 | 0 | Oligo1 | Sparcl1       |
| 0 | 0,654481521 | 0,846 | 0,528 | 0 | Oligo1 | Cdc3711       |
| 0 | 0,647386492 | 0,505 | 0,081 | 0 | Oligo1 | Mal           |
| 0 | 0,640725724 | 0,886 | 0,642 | 0 | Oligo1 | Rtn4          |
| 0 | 0,625958218 | 0,595 | 0,217 | 0 | Oligo1 | Prox1         |
| 0 | 0,619225639 | 0,695 | 0,308 | 0 | Oligo1 | Slc12a2       |
| 0 | 0,614829307 | 0,533 | 0,117 | 0 | Oligo1 | Csrp1         |

|           |             |       |       |           |        |          |
|-----------|-------------|-------|-------|-----------|--------|----------|
| 0         | 0,613834413 | 1     | 0,987 | 0         | Oligo1 | Pcdh9    |
| 0         | 0,607291275 | 0,567 | 0,172 | 0         | Oligo1 | Arhgef10 |
| 0         | 0,603861169 | 0,57  | 0,214 | 0         | Oligo1 | Appl2    |
| 0         | 0,596971782 | 0,522 | 0,142 | 0         | Oligo1 | Scd2     |
| 0         | 0,595124039 | 0,965 | 0,867 | 0         | Oligo1 | Mapt     |
| 0         | 0,594085272 | 0,626 | 0,269 | 0         | Oligo1 | Usp54    |
| 0         | 0,590899864 | 0,56  | 0,126 | 0         | Oligo1 | Sox10    |
| 0         | 0,564543591 | 0,536 | 0,154 | 0         | Oligo1 | Pstpip2  |
| 0         | 0,563394174 | 0,597 | 0,229 | 0         | Oligo1 | Sema6a   |
| 0         | 0,545499374 | 0,535 | 0,164 | 0         | Oligo1 | Cntn2    |
| 0         | 0,539987366 | 0,516 | 0,111 | 0         | Oligo1 | Ptgds    |
| 0         | 0,529283281 | 0,577 | 0,218 | 0         | Oligo1 | Chd7     |
| 0         | 0,525927538 | 0,511 | 0,152 | 0         | Oligo1 | Wipf1    |
| 0         | 0,512611221 | 0,508 | 0,161 | 0         | Oligo1 | Rffl     |
| 6,21E-306 | 0,738292577 | 0,772 | 0,42  | 1,67E-301 | Oligo1 | Pacrg    |
| 5,78E-305 | 0,627552043 | 0,937 | 0,71  | 1,56E-300 | Oligo1 | Limch1   |
| 3,34E-304 | 0,750986526 | 0,796 | 0,45  | 9,01E-300 | Oligo1 | Myo6     |
| 5,00E-301 | 0,520339971 | 0,851 | 0,457 | 1,35E-296 | Oligo1 | Plxdc2   |
| 8,91E-301 | 0,664263281 | 0,757 | 0,412 | 2,40E-296 | Oligo1 | Kif13b   |
| 1,94E-296 | 0,658063657 | 0,565 | 0,23  | 5,22E-292 | Oligo1 | Acsl3    |
| 6,22E-294 | 0,564446911 | 0,679 | 0,302 | 1,68E-289 | Oligo1 | Stard13  |
| 6,43E-284 | 0,63279326  | 0,804 | 0,488 | 1,73E-279 | Oligo1 | Vmp1     |
| 1,66E-282 | 0,638412358 | 0,828 | 0,51  | 4,47E-278 | Oligo1 | Daam1    |
| 1,71E-282 | 0,654743593 | 0,779 | 0,4   | 4,60E-278 | Oligo1 | Pitpnc1  |
| 1,94E-282 | 0,628354703 | 0,834 | 0,543 | 5,23E-278 | Oligo1 | Bin1     |
| 1,25E-278 | 0,630536698 | 0,756 | 0,413 | 3,37E-274 | Oligo1 | Hipk2    |
| 3,31E-278 | 0,616211916 | 0,83  | 0,54  | 8,92E-274 | Oligo1 | Tlll7    |
| 2,79E-273 | 0,551666043 | 0,653 | 0,316 | 7,52E-269 | Oligo1 | Slain1   |
| 5,28E-270 | 0,522300656 | 0,568 | 0,239 | 1,42E-265 | Oligo1 | Smad7    |
| 6,61E-265 | 0,610009955 | 0,974 | 0,885 | 1,78E-260 | Oligo1 | Fgfr2    |
| 1,89E-264 | 0,703894327 | 0,72  | 0,353 | 5,08E-260 | Oligo1 | Cdh20    |
| 1,34E-262 | 0,81457633  | 0,806 | 0,448 | 3,60E-258 | Oligo1 | Npas3    |
| 2,38E-252 | 0,662582951 | 0,986 | 0,813 | 6,42E-248 | Oligo1 | Kirrel3  |
| 6,77E-250 | 0,59854433  | 0,804 | 0,498 | 1,82E-245 | Oligo1 | Pard3    |
| 3,19E-249 | 0,566178337 | 0,892 | 0,595 | 8,60E-245 | Oligo1 | Foxn3    |
| 4,46E-248 | 0,502869032 | 0,507 | 0,21  | 1,20E-243 | Oligo1 | Kndc1    |
| 6,59E-248 | 0,611488483 | 0,837 | 0,573 | 1,77E-243 | Oligo1 | Tulp4    |
| 1,92E-241 | 0,515220577 | 0,592 | 0,276 | 5,18E-237 | Oligo1 | Myo1d    |
| 4,41E-239 | 0,590451825 | 0,867 | 0,586 | 1,19E-234 | Oligo1 | Ano4     |
| 1,66E-238 | 0,588334146 | 0,836 | 0,577 | 4,48E-234 | Oligo1 | Mast3    |
| 3,04E-236 | 0,50826324  | 0,674 | 0,361 | 8,20E-232 | Oligo1 | Appl1    |
| 5,22E-235 | 0,55253004  | 0,736 | 0,429 | 1,41E-230 | Oligo1 | Nbas     |
| 2,70E-230 | 0,574090391 | 0,999 | 0,809 | 7,28E-226 | Oligo1 | Zbtb20   |

|           |             |       |       |           |        |         |
|-----------|-------------|-------|-------|-----------|--------|---------|
| 6,09E-225 | 0,523270266 | 0,651 | 0,337 | 1,64E-220 | Oligo1 | Otud7b  |
| 6,17E-222 | 0,546802649 | 0,846 | 0,627 | 1,66E-217 | Oligo1 | Agap1   |
| 1,24E-219 | 0,61896014  | 0,684 | 0,363 | 3,34E-215 | Oligo1 | Ptn     |
| 5,20E-218 | 0,517381006 | 0,674 | 0,365 | 1,40E-213 | Oligo1 | Grb14   |
| 2,76E-217 | 0,534373903 | 0,867 | 0,681 | 7,44E-213 | Oligo1 | Tbc1d5  |
| 1,22E-211 | 0,524172995 | 0,984 | 0,834 | 3,29E-207 | Oligo1 | Ncam2   |
| 6,78E-208 | 0,549316502 | 0,923 | 0,769 | 1,83E-203 | Oligo1 | Sik3    |
| 8,65E-206 | 0,661600026 | 0,855 | 0,683 | 2,33E-201 | Oligo1 | Tspan7  |
| 1,77E-204 | 0,515311253 | 0,708 | 0,408 | 4,77E-200 | Oligo1 | Abhd17b |
| 1,38E-200 | 0,536957159 | 0,911 | 0,67  | 3,72E-196 | Oligo1 | Ctnna3  |
| 2,88E-193 | 0,50348557  | 0,65  | 0,34  | 7,76E-189 | Oligo1 | Ephb1   |
| 3,01E-177 | 0,502088035 | 0,721 | 0,447 | 8,12E-173 | Oligo1 | Adk     |
| 3,40E-162 | 0,599621711 | 0,766 | 0,576 | 9,17E-158 | Oligo1 | Il1rap  |
| 1,54E-160 | 0,570733546 | 0,586 | 0,325 | 4,15E-156 | Oligo1 | Sema5a  |
| 7,22E-157 | 0,76030429  | 0,786 | 0,642 | 1,95E-152 | Oligo1 | Rfx3    |
| 6,70E-151 | 0,504611107 | 0,637 | 0,395 | 1,80E-146 | Oligo1 | Plekha1 |
| 8,16E-147 | 0,520143991 | 0,796 | 0,61  | 2,20E-142 | Oligo1 | Hdac8   |
| 1,38E-146 | 0,659087948 | 0,758 | 0,575 | 3,71E-142 | Oligo1 | Msi2    |
| 2,37E-142 | 0,528942164 | 0,646 | 0,401 | 6,39E-138 | Oligo1 | Thsd7a  |
| 2,41E-133 | 0,656824406 | 0,651 | 0,446 | 6,50E-129 | Oligo1 | Synpr   |
| 4,71E-97  | 1,063559357 | 0,632 | 0,554 | 1,27E-92  | Oligo1 | Slc1a2  |
| 2,23E-78  | 0,67787352  | 0,707 | 0,655 | 6,00E-74  | Oligo1 | Wdr17   |
| 2,85E-75  | 0,58347702  | 0,685 | 0,614 | 7,68E-71  | Oligo1 | Gm3764  |
| 1,59E-50  | 0,569888565 | 0,703 | 0,733 | 4,29E-46  | Oligo1 | Ahcyl2  |
| 1,32E-48  | 0,870154245 | 0,584 | 0,559 | 3,55E-44  | Oligo1 | Gpc5    |

|   |             |       |       |   |        |         |
|---|-------------|-------|-------|---|--------|---------|
| 0 | 3,312431511 | 1     | 0,708 | 0 | Oligo2 | Pde4b   |
| 0 | 3,303737335 | 0,987 | 0,123 | 0 | Oligo2 | Plp1    |
| 0 | 3,181579612 | 0,997 | 0,263 | 0 | Oligo2 | Mbp     |
| 0 | 2,856812929 | 1     | 0,855 | 0 | Oligo2 | Tmeff2  |
| 0 | 2,792183718 | 0,976 | 0,267 | 0 | Oligo2 | St18    |
| 0 | 2,744358114 | 0,939 | 0,104 | 0 | Oligo2 | Prr5l   |
| 0 | 2,524701204 | 0,924 | 0,242 | 0 | Oligo2 | Rnf220  |
| 0 | 2,352312271 | 1     | 0,986 | 0 | Oligo2 | Pcdh9   |
| 0 | 2,319018171 | 0,996 | 0,492 | 0 | Oligo2 | Dock10  |
| 0 | 2,312620425 | 0,864 | 0,081 | 0 | Oligo2 | Mobp    |
| 0 | 2,267620312 | 0,997 | 0,612 | 0 | Oligo2 | Plcl1   |
| 0 | 2,245872838 | 1     | 0,981 | 0 | Oligo2 | Nkain2  |
| 0 | 2,196609771 | 1     | 0,939 | 0 | Oligo2 | Slc24a2 |
| 0 | 2,191145853 | 0,873 | 0,088 | 0 | Oligo2 | Mag     |
| 0 | 2,177895275 | 0,997 | 0,521 | 0 | Oligo2 | Qk      |
| 0 | 2,168299398 | 0,996 | 0,696 | 0 | Oligo2 | Edil3   |
| 0 | 2,085261342 | 0,998 | 0,731 | 0 | Oligo2 | Frmf5   |

|   |             |       |       |   |        |               |
|---|-------------|-------|-------|---|--------|---------------|
| 0 | 2,073627363 | 0,817 | 0,088 | 0 | Oligo2 | Trf           |
| 0 | 2,055628321 | 0,836 | 0,08  | 0 | Oligo2 | Mog           |
| 0 | 2,037753442 | 0,934 | 0,43  | 0 | Oligo2 | 07. Sep       |
| 0 | 2,010022388 | 0,996 | 0,685 | 0 | Oligo2 | Phlpp1        |
| 0 | 2,005002497 | 0,901 | 0,192 | 0 | Oligo2 | Enpp2         |
| 0 | 1,992672448 | 0,992 | 0,655 | 0 | Oligo2 | Fnbp1         |
| 0 | 1,952202042 | 0,992 | 0,655 | 0 | Oligo2 | Map7          |
| 0 | 1,935984392 | 0,79  | 0,08  | 0 | Oligo2 | Aspa          |
| 0 | 1,879226756 | 0,991 | 0,849 | 0 | Oligo2 | Mast4         |
| 0 | 1,870835225 | 0,907 | 0,327 | 0 | Oligo2 | Zfp536        |
| 0 | 1,856305736 | 0,74  | 0,192 | 0 | Oligo2 | Gm16168       |
| 0 | 1,847540372 | 0,819 | 0,157 | 0 | Oligo2 | Phldb1        |
| 0 | 1,831122994 | 0,976 | 0,547 | 0 | Oligo2 | Ano4          |
| 0 | 1,801876236 | 0,745 | 0,078 | 0 | Oligo2 | D7Ert443e     |
| 0 | 1,752039073 | 0,825 | 0,265 | 0 | Oligo2 | Tubb4a        |
| 0 | 1,749962008 | 0,761 | 0,087 | 0 | Oligo2 | Gjc3          |
| 0 | 1,747627514 | 0,992 | 0,637 | 0 | Oligo2 | Dnm3          |
| 0 | 1,738084691 | 0,806 | 0,228 | 0 | Oligo2 | Erbin         |
| 0 | 1,725115378 | 0,733 | 0,074 | 0 | Oligo2 | Ugt8a         |
| 0 | 1,694425152 | 0,834 | 0,314 | 0 | Oligo2 | Arhgap23      |
| 0 | 1,677526665 | 0,994 | 0,741 | 0 | Oligo2 | St6galnac3    |
| 0 | 1,676584606 | 0,711 | 0,083 | 0 | Oligo2 | Pde8a         |
| 0 | 1,629828018 | 0,903 | 0,272 | 0 | Oligo2 | Sox2ot        |
| 0 | 1,628619613 | 0,628 | 0,054 | 0 | Oligo2 | C030029H02Rik |
| 0 | 1,616999847 | 0,961 | 0,611 | 0 | Oligo2 | Rtn4          |
| 0 | 1,616874409 | 0,703 | 0,07  | 0 | Oligo2 | Sec14l5       |
| 0 | 1,598809237 | 0,77  | 0,274 | 0 | Oligo2 | Cdk19         |
| 0 | 1,598277953 | 0,7   | 0,075 | 0 | Oligo2 | Fa2h          |
| 0 | 1,594548687 | 0,676 | 0,118 | 0 | Oligo2 | Car2          |
| 0 | 1,588541238 | 0,754 | 0,239 | 0 | Oligo2 | Ypel2         |
| 0 | 1,576271204 | 0,995 | 0,854 | 0 | Oligo2 | Mapt          |
| 0 | 1,575455393 | 1     | 0,995 | 0 | Oligo2 | Magi2         |
| 0 | 1,574769993 | 0,755 | 0,1   | 0 | Oligo2 | Bcas1         |
| 0 | 1,555093721 | 0,618 | 0,121 | 0 | Oligo2 | Neat1         |
| 0 | 1,553791156 | 0,651 | 0,071 | 0 | Oligo2 | Tspan2        |
| 0 | 1,546681481 | 0,894 | 0,506 | 0 | Oligo2 | Ttll7         |
| 0 | 1,544798616 | 0,993 | 0,759 | 0 | Oligo2 | Pak7          |
| 0 | 1,530731154 | 0,791 | 0,408 | 0 | Oligo2 | Pak1          |
| 0 | 1,520482075 | 0,673 | 0,069 | 0 | Oligo2 | Plekhh1       |
| 0 | 1,513687592 | 0,655 | 0,147 | 0 | Oligo2 | Sytl2         |
| 0 | 1,493949392 | 0,682 | 0,137 | 0 | Oligo2 | Gab1          |
| 0 | 1,479495008 | 0,765 | 0,314 | 0 | Oligo2 | Aatk          |
| 0 | 1,475713604 | 0,696 | 0,146 | 0 | Oligo2 | 04. Sep       |

|   |             |       |       |   |        |               |
|---|-------------|-------|-------|---|--------|---------------|
| 0 | 1,472316723 | 0,977 | 0,64  | 0 | Oligo2 | Ctnna3        |
| 0 | 1,451524978 | 0,6   | 0,048 | 0 | Oligo2 | Opalin        |
| 0 | 1,437763446 | 0,739 | 0,318 | 0 | Oligo2 | Ppp1r16b      |
| 0 | 1,434529741 | 0,66  | 0,096 | 0 | Oligo2 | Gatm          |
| 0 | 1,424949628 | 0,846 | 0,498 | 0 | Oligo2 | Cdc3711       |
| 0 | 1,423386163 | 0,585 | 0,066 | 0 | Oligo2 | Ptgds         |
| 0 | 1,417144475 | 0,962 | 0,518 | 0 | Oligo2 | Gm3           |
| 0 | 1,412449179 | 0,624 | 0,086 | 0 | Oligo2 | Ccp110        |
| 0 | 1,404093209 | 0,871 | 0,511 | 0 | Oligo2 | Bin1          |
| 0 | 1,39903659  | 0,603 | 0,059 | 0 | Oligo2 | 1700047M11Rik |
| 0 | 1,398539301 | 0,605 | 0,096 | 0 | Oligo2 | Cdh19         |
| 0 | 1,388316447 | 0,991 | 0,812 | 0 | Oligo2 | Pex5l         |
| 0 | 1,383083346 | 0,75  | 0,381 | 0 | Oligo2 | Kif13b        |
| 0 | 1,356645406 | 0,796 | 0,46  | 0 | Oligo2 | Vmp1          |
| 0 | 1,34492574  | 0,548 | 0,037 | 0 | Oligo2 | Mal           |
| 0 | 1,330992071 | 0,591 | 0,092 | 0 | Oligo2 | Creb5         |
| 0 | 1,300142474 | 0,951 | 0,655 | 0 | Oligo2 | Tbc1d5        |
| 0 | 1,294757305 | 0,524 | 0,056 | 0 | Oligo2 | Ninj2         |
| 0 | 1,291304626 | 0,706 | 0,395 | 0 | Oligo2 | Pacrg         |
| 0 | 1,283974462 | 0,684 | 0,274 | 0 | Oligo2 | Slc12a2       |
| 0 | 1,283119991 | 0,953 | 0,611 | 0 | Oligo2 | Gm4258        |
| 0 | 1,279400459 | 0,93  | 0,639 | 0 | Oligo2 | Shtn1         |
| 0 | 1,276346839 | 0,998 | 0,874 | 0 | Oligo2 | Fgfr2         |
| 0 | 1,267760503 | 0,861 | 0,42  | 0 | Oligo2 | Plxdc2        |
| 0 | 1,26727981  | 0,665 | 0,206 | 0 | Oligo2 | Plekhg1       |
| 0 | 1,255309285 | 0,675 | 0,295 | 0 | Oligo2 | Kif13a        |
| 0 | 1,244994884 | 0,993 | 0,915 | 0 | Oligo2 | Prickle2      |
| 0 | 1,244754327 | 0,772 | 0,34  | 0 | Oligo2 | Elmo1         |
| 0 | 1,233113813 | 0,959 | 0,66  | 0 | Oligo2 | Klhl2         |
| 0 | 1,225389998 | 0,529 | 0,037 | 0 | Oligo2 | Cldn11        |
| 0 | 1,196925285 | 0,995 | 0,884 | 0 | Oligo2 | Zeb2          |
| 0 | 1,19647231  | 0,852 | 0,547 | 0 | Oligo2 | Tulp4         |
| 0 | 1,195391014 | 0,885 | 0,462 | 0 | Oligo2 | Frm4b         |
| 0 | 1,160344338 | 0,98  | 0,748 | 0 | Oligo2 | Sik3          |
| 0 | 1,158192691 | 0,637 | 0,286 | 0 | Oligo2 | Slain1        |
| 0 | 1,1574686   | 0,585 | 0,196 | 0 | Oligo2 | Sema6a        |
| 0 | 1,153939179 | 0,901 | 0,598 | 0 | Oligo2 | Wnk1          |
| 0 | 1,146369771 | 0,978 | 0,762 | 0 | Oligo2 | Tcf12         |
| 0 | 1,143648112 | 0,997 | 0,927 | 0 | Oligo2 | Mbnl2         |
| 0 | 1,136084774 | 0,56  | 0,136 | 0 | Oligo2 | Arhgef10      |
| 0 | 1,1357073   | 0,557 | 0,087 | 0 | Oligo2 | Sox10         |
| 0 | 1,120162377 | 0,679 | 0,323 | 0 | Oligo2 | Cdh20         |
| 0 | 1,10664288  | 0,992 | 0,875 | 0 | Oligo2 | Exoc6b        |

|   |             |       |       |   |        |          |
|---|-------------|-------|-------|---|--------|----------|
| 0 | 1,104698775 | 0,593 | 0,247 | 0 | Oligo2 | Myo1d    |
| 0 | 1,102462103 | 0,851 | 0,548 | 0 | Oligo2 | Naaladl2 |
| 0 | 1,102269303 | 0,992 | 0,843 | 0 | Oligo2 | Clasp2   |
| 0 | 1,100433404 | 0,949 | 0,696 | 0 | Oligo2 | Nfasc    |
| 0 | 1,097744285 | 0,988 | 0,828 | 0 | Oligo2 | Atp8a1   |
| 0 | 1,092424287 | 0,741 | 0,49  | 0 | Oligo2 | Daam1    |
| 0 | 1,089710826 | 0,508 | 0,122 | 0 | Oligo2 | Pstpip2  |
| 0 | 1,087164606 | 0,711 | 0,327 | 0 | Oligo2 | Sorcs1   |
| 0 | 1,084170074 | 0,665 | 0,409 | 0 | Oligo2 | Nbas     |
| 0 | 1,074752789 | 0,971 | 0,685 | 0 | Oligo2 | Limch1   |
| 0 | 1,063303237 | 0,523 | 0,131 | 0 | Oligo2 | Cntn2    |
| 0 | 1,062969177 | 0,867 | 0,549 | 0 | Oligo2 | Mast3    |
| 0 | 1,058421796 | 0,533 | 0,106 | 0 | Oligo2 | Scd2     |
| 0 | 1,054550125 | 0,619 | 0,312 | 0 | Oligo2 | Otud7b   |
| 0 | 1,050402184 | 0,664 | 0,392 | 0 | Oligo2 | Hipk2    |
| 0 | 1,04879184  | 0,592 | 0,378 | 0 | Oligo2 | Plekha1  |
| 0 | 1,031486822 | 0,567 | 0,142 | 0 | Oligo2 | Daam2    |
| 0 | 1,028395012 | 0,578 | 0,217 | 0 | Oligo2 | Rab31    |
| 0 | 1,027457155 | 0,994 | 0,898 | 0 | Oligo2 | Kif1b    |
| 0 | 1,018158738 | 0,895 | 0,602 | 0 | Oligo2 | Agap1    |
| 0 | 1,016621463 | 0,996 | 0,905 | 0 | Oligo2 | Ncam1    |
| 0 | 1,014157512 | 0,606 | 0,292 | 0 | Oligo2 | Clnn     |
| 0 | 1,01289152  | 0,573 | 0,242 | 0 | Oligo2 | Usp54    |
| 0 | 1,01200349  | 0,661 | 0,487 | 0 | Oligo2 | Zdhhc20  |
| 0 | 1,006054094 | 0,793 | 0,539 | 0 | Oligo2 | Ankrd28  |
| 0 | 0,998645359 | 0,598 | 0,308 | 0 | Oligo2 | Dip2a    |
| 0 | 0,993557428 | 0,538 | 0,212 | 0 | Oligo2 | Smad7    |
| 0 | 0,991789875 | 0,968 | 0,323 | 0 | Oligo2 | Erbp4    |
| 0 | 0,988553244 | 0,99  | 0,87  | 0 | Oligo2 | App      |
| 0 | 0,971601866 | 0,969 | 0,722 | 0 | Oligo2 | Hecw2    |
| 0 | 0,970782745 | 0,953 | 0,635 | 0 | Oligo2 | Ptprk    |
| 0 | 0,969998805 | 0,702 | 0,429 | 0 | Oligo2 | Myo6     |
| 0 | 0,966559649 | 0,975 | 0,758 | 0 | Oligo2 | Baz2b    |
| 0 | 0,95991308  | 0,99  | 0,873 | 0 | Oligo2 | Tmcc1    |
| 0 | 0,953581571 | 0,998 | 0,914 | 0 | Oligo2 | Dst      |
| 0 | 0,931016609 | 0,686 | 0,432 | 0 | Oligo2 | Sh3d19   |
| 0 | 0,930084279 | 0,994 | 0,911 | 0 | Oligo2 | Cdc42bpa |
| 0 | 0,918836989 | 0,566 | 0,207 | 0 | Oligo2 | Dock1    |
| 0 | 0,910871332 | 0,628 | 0,466 | 0 | Oligo2 | Tmod2    |
| 0 | 0,910448786 | 0,502 | 0,192 | 0 | Oligo2 | Rcctb1   |
| 0 | 0,898078576 | 0,583 | 0,347 | 0 | Oligo2 | Grb14    |
| 0 | 0,897320966 | 0,95  | 0,676 | 0 | Oligo2 | Dlg1     |
| 0 | 0,89486769  | 0,608 | 0,392 | 0 | Oligo2 | Abhd17b  |

|   |             |       |       |   |        |               |
|---|-------------|-------|-------|---|--------|---------------|
| 0 | 0,885650578 | 0,567 | 0,368 | 0 | Oligo2 | Lpgat1        |
| 0 | 0,884466408 | 0,557 | 0,301 | 0 | Oligo2 | Nrbp2         |
| 0 | 0,876497859 | 0,514 | 0,261 | 0 | Oligo2 | Ywhaq         |
| 0 | 0,875600229 | 0,993 | 0,838 | 0 | Oligo2 | Tmem178b      |
| 0 | 0,875561903 | 1     | 0,951 | 0 | Oligo2 | Ptpd          |
| 0 | 0,874400505 | 0,913 | 0,692 | 0 | Oligo2 | Pakap         |
| 0 | 0,871823759 | 0,59  | 0,405 | 0 | Oligo2 | Ttll5         |
| 0 | 0,862857328 | 0,812 | 0,58  | 0 | Oligo2 | Map4          |
| 0 | 0,862066165 | 0,558 | 0,345 | 0 | Oligo2 | Aplp1         |
| 0 | 0,859931585 | 0,638 | 0,464 | 0 | Oligo2 | Ppp2r3a       |
| 0 | 0,847829109 | 0,887 | 0,568 | 0 | Oligo2 | Foxn3         |
| 0 | 0,839352033 | 0,973 | 0,773 | 0 | Oligo2 | Dip2b         |
| 0 | 0,838744865 | 0,83  | 0,6   | 0 | Oligo2 | Slc44a1       |
| 0 | 0,836456648 | 0,71  | 0,515 | 0 | Oligo2 | Srcin1        |
| 0 | 0,836245558 | 0,563 | 0,374 | 0 | Oligo2 | Slc38a2       |
| 0 | 0,806049433 | 0,998 | 0,962 | 0 | Oligo2 | Lrp1b         |
| 0 | 0,79148039  | 0,565 | 0,366 | 0 | Oligo2 | Pip4k2a       |
| 0 | 0,787055321 | 0,994 | 0,886 | 0 | Oligo2 | Ptk2          |
| 0 | 0,786690153 | 0,527 | 0,337 | 0 | Oligo2 | 5031439G07Rik |
| 0 | 0,782359855 | 0,781 | 0,581 | 0 | Oligo2 | Itch          |
| 0 | 0,781839935 | 0,613 | 0,342 | 0 | Oligo2 | Ptn           |
| 0 | 0,780173108 | 0,999 | 0,994 | 0 | Oligo2 | Ank2          |
| 0 | 0,767008976 | 0,905 | 0,649 | 0 | Oligo2 | Zdhhc14       |
| 0 | 0,766548536 | 0,988 | 0,829 | 0 | Oligo2 | Unc5c         |
| 0 | 0,762386277 | 0,523 | 0,339 | 0 | Oligo2 | Rnf13         |
| 0 | 0,750769972 | 0,54  | 0,36  | 0 | Oligo2 | Picalm        |
| 0 | 0,748823012 | 0,994 | 0,819 | 0 | Oligo2 | Ncam2         |
| 0 | 0,747000237 | 0,532 | 0,258 | 0 | Oligo2 | Adamts1       |
| 0 | 0,743553601 | 0,729 | 0,535 | 0 | Oligo2 | Dleu2         |
| 0 | 0,736709499 | 0,903 | 0,717 | 0 | Oligo2 | Zfp638        |
| 0 | 0,736088379 | 0,536 | 0,324 | 0 | Oligo2 | Ephb1         |
| 0 | 0,730336232 | 0,977 | 0,833 | 0 | Oligo2 | Dscaml1       |
| 0 | 0,727770906 | 1     | 1     | 0 | Oligo2 | Malat1        |
| 0 | 0,726472211 | 0,577 | 0,349 | 0 | Oligo2 | Tmcc3         |
| 0 | 0,725593085 | 0,531 | 0,359 | 0 | Oligo2 | Shisa4        |
| 0 | 0,713639151 | 0,914 | 0,702 | 0 | Oligo2 | Pkp4          |
| 0 | 0,705557111 | 0,535 | 0,423 | 0 | Oligo2 | Ankib1        |
| 0 | 0,702187381 | 0,969 | 0,793 | 0 | Oligo2 | Ssh2          |
| 0 | 0,701513559 | 0,531 | 0,388 | 0 | Oligo2 | Cyth1         |
| 0 | 0,686724125 | 0,978 | 0,856 | 0 | Oligo2 | Trim2         |
| 0 | 0,67824967  | 1     | 0,989 | 0 | Oligo2 | Ank3          |
| 0 | 0,67701732  | 0,978 | 0,695 | 0 | Oligo2 | Mir100hg      |
| 0 | 0,676598775 | 0,71  | 0,566 | 0 | Oligo2 | Itsn2         |



|   |             |       |       |   |               |          |
|---|-------------|-------|-------|---|---------------|----------|
| 0 | 1,398728267 | 0,917 | 0,363 | 0 | Dentate Gyrus | Cdh9     |
| 0 | 1,307362372 | 0,961 | 0,508 | 0 | Dentate Gyrus | Maml2    |
| 0 | 1,30621147  | 0,989 | 0,644 | 0 | Dentate Gyrus | Trpm3    |
| 0 | 1,27293663  | 0,976 | 0,719 | 0 | Dentate Gyrus | Epha7    |
| 0 | 1,270274016 | 0,987 | 0,86  | 0 | Dentate Gyrus | Ptxna4   |
| 0 | 1,257075604 | 0,999 | 0,896 | 0 | Dentate Gyrus | Slit3    |
| 0 | 1,254274479 | 0,976 | 0,816 | 0 | Dentate Gyrus | Btd9     |
| 0 | 1,253905005 | 1     | 0,966 | 0 | Dentate Gyrus | Erc2     |
| 0 | 1,246518469 | 0,892 | 0,345 | 0 | Dentate Gyrus | Thsd7a   |
| 0 | 1,244227659 | 0,982 | 0,67  | 0 | Dentate Gyrus | Zfpm2    |
| 0 | 1,240301933 | 0,963 | 0,752 | 0 | Dentate Gyrus | Sphkap   |
| 0 | 1,23274669  | 0,974 | 0,677 | 0 | Dentate Gyrus | Tmem108  |
| 0 | 1,231119871 | 1     | 0,845 | 0 | Dentate Gyrus | Lingo2   |
| 0 | 1,230544779 | 1     | 0,965 | 0 | Dentate Gyrus | Ppp3ca   |
| 0 | 1,230513695 | 0,907 | 0,405 | 0 | Dentate Gyrus | Tiam1    |
| 0 | 1,229922473 | 0,982 | 0,414 | 0 | Dentate Gyrus | Adarb2   |
| 0 | 1,225322839 | 0,99  | 0,805 | 0 | Dentate Gyrus | Gm20754  |
| 0 | 1,215584409 | 0,916 | 0,51  | 0 | Dentate Gyrus | Shisa9   |
| 0 | 1,21061256  | 0,774 | 0,195 | 0 | Dentate Gyrus | C1ql3    |
| 0 | 1,203549696 | 1     | 0,951 | 0 | Dentate Gyrus | Dab1     |
| 0 | 1,191462526 | 0,977 | 0,746 | 0 | Dentate Gyrus | Mctp1    |
| 0 | 1,182715638 | 0,91  | 0,585 | 0 | Dentate Gyrus | Pip5k1b  |
| 0 | 1,179829686 | 0,903 | 0,54  | 0 | Dentate Gyrus | Il1rap   |
| 0 | 1,179193737 | 0,976 | 0,732 | 0 | Dentate Gyrus | Cntnap5a |
| 0 | 1,171982951 | 0,697 | 0,203 | 0 | Dentate Gyrus | Trpc6    |
| 0 | 1,166313105 | 0,881 | 0,494 | 0 | Dentate Gyrus | Lyst     |
| 0 | 1,164619563 | 0,925 | 0,463 | 0 | Dentate Gyrus | Slc4a4   |
| 0 | 1,141949272 | 1     | 0,945 | 0 | Dentate Gyrus | Ryr2     |
| 0 | 1,137859953 | 0,997 | 0,935 | 0 | Dentate Gyrus | Prkce    |
| 0 | 1,125159612 | 0,955 | 0,691 | 0 | Dentate Gyrus | Gm1      |
| 0 | 1,121115285 | 0,989 | 0,826 | 0 | Dentate Gyrus | Gaint17  |
| 0 | 1,116806755 | 0,811 | 0,342 | 0 | Dentate Gyrus | Pdzd2    |
| 0 | 1,115847158 | 0,998 | 0,794 | 0 | Dentate Gyrus | Kirrel3  |
| 0 | 1,086642436 | 0,969 | 0,86  | 0 | Dentate Gyrus | Rasa2    |
| 0 | 1,085752275 | 1     | 0,947 | 0 | Dentate Gyrus | Negr1    |
| 0 | 1,084338942 | 0,995 | 0,904 | 0 | Dentate Gyrus | Cacna1c  |
| 0 | 1,074179291 | 0,658 | 0,194 | 0 | Dentate Gyrus | Chst9    |
| 0 | 1,067057706 | 1     | 0,789 | 0 | Dentate Gyrus | Zbtb20   |
| 0 | 1,062714598 | 0,911 | 0,694 | 0 | Dentate Gyrus | Gm28376  |
| 0 | 1,048140642 | 1     | 0,986 | 0 | Dentate Gyrus | Auts2    |
| 0 | 1,0223302   | 1     | 0,952 | 0 | Dentate Gyrus | Grin2a   |
| 0 | 0,988005689 | 0,825 | 0,439 | 0 | Dentate Gyrus | Jph1     |
| 0 | 0,980323694 | 0,995 | 0,891 | 0 | Dentate Gyrus | Cacna1e  |

|   |             |       |       |   |               |               |
|---|-------------|-------|-------|---|---------------|---------------|
| 0 | 0,972606077 | 0,984 | 0,822 | 0 | Dentate Gyrus | Nr3c2         |
| 0 | 0,970141111 | 0,883 | 0,548 | 0 | Dentate Gyrus | 2010300C02Rik |
| 0 | 0,965064908 | 0,968 | 0,88  | 0 | Dentate Gyrus | Map1b         |
| 0 | 0,963130138 | 0,958 | 0,804 | 0 | Dentate Gyrus | Cdh8          |
| 0 | 0,959701711 | 0,894 | 0,633 | 0 | Dentate Gyrus | Camk2b        |
| 0 | 0,959690386 | 1     | 0,956 | 0 | Dentate Gyrus | Kcnip4        |
| 0 | 0,949111111 | 0,998 | 0,951 | 0 | Dentate Gyrus | Dpp6          |
| 0 | 0,948894542 | 0,789 | 0,34  | 0 | Dentate Gyrus | Pitpnm2       |
| 0 | 0,944125406 | 0,998 | 0,936 | 0 | Dentate Gyrus | Camk2a        |
| 0 | 0,940657156 | 0,993 | 0,854 | 0 | Dentate Gyrus | Egfem1        |
| 0 | 0,938484097 | 0,81  | 0,561 | 0 | Dentate Gyrus | Cntnap5b      |
| 0 | 0,934935678 | 0,987 | 0,909 | 0 | Dentate Gyrus | Ntrk3         |
| 0 | 0,9286368   | 0,973 | 0,846 | 0 | Dentate Gyrus | Mmp16         |
| 0 | 0,92860797  | 0,922 | 0,737 | 0 | Dentate Gyrus | Kcnj6         |
| 0 | 0,928007324 | 0,812 | 0,34  | 0 | Dentate Gyrus | Prkd1         |
| 0 | 0,919573462 | 0,743 | 0,321 | 0 | Dentate Gyrus | Cyp7b1        |
| 0 | 0,911466057 | 1     | 0,987 | 0 | Dentate Gyrus | Dlgap1        |
| 0 | 0,908586307 | 0,916 | 0,726 | 0 | Dentate Gyrus | Vps13c        |
| 0 | 0,908048927 | 0,864 | 0,5   | 0 | Dentate Gyrus | Tanc1         |
| 0 | 0,906747624 | 0,806 | 0,34  | 0 | Dentate Gyrus | Maml3         |
| 0 | 0,894789129 | 1     | 0,962 | 0 | Dentate Gyrus | Lrp1b         |
| 0 | 0,894266444 | 1     | 0,97  | 0 | Dentate Gyrus | Kcnd2         |
| 0 | 0,893355567 | 1     | 0,968 | 0 | Dentate Gyrus | Kalm          |
| 0 | 0,89134526  | 0,779 | 0,343 | 0 | Dentate Gyrus | Nrg2          |
| 0 | 0,887497455 | 0,81  | 0,36  | 0 | Dentate Gyrus | Ptchd4        |
| 0 | 0,882414746 | 0,806 | 0,404 | 0 | Dentate Gyrus | Plekhg5       |
| 0 | 0,878507483 | 0,783 | 0,391 | 0 | Dentate Gyrus | Adcy1         |
| 0 | 0,875730896 | 0,772 | 0,407 | 0 | Dentate Gyrus | Slc7a14       |
| 0 | 0,874300449 | 0,832 | 0,486 | 0 | Dentate Gyrus | Slit1         |
| 0 | 0,873824493 | 0,67  | 0,169 | 0 | Dentate Gyrus | Prox1         |
| 0 | 0,872063102 | 0,692 | 0,269 | 0 | Dentate Gyrus | Htr4          |
| 0 | 0,870477998 | 0,951 | 0,831 | 0 | Dentate Gyrus | Nsf           |
| 0 | 0,868855935 | 0,794 | 0,368 | 0 | Dentate Gyrus | Itga8         |
| 0 | 0,86509862  | 1     | 0,928 | 0 | Dentate Gyrus | Gria1         |
| 0 | 0,859379101 | 0,916 | 0,688 | 0 | Dentate Gyrus | Ak5           |
| 0 | 0,859199162 | 0,888 | 0,627 | 0 | Dentate Gyrus | Slc2a13       |
| 0 | 0,818547115 | 0,988 | 0,891 | 0 | Dentate Gyrus | Clstn2        |
| 0 | 0,818096777 | 0,933 | 0,81  | 0 | Dentate Gyrus | Fam135b       |
| 0 | 0,816423333 | 0,997 | 0,949 | 0 | Dentate Gyrus | Lrfr5         |
| 0 | 0,809257931 | 0,999 | 0,958 | 0 | Dentate Gyrus | Grik2         |
| 0 | 0,808300795 | 0,901 | 0,702 | 0 | Dentate Gyrus | Tenm1         |
| 0 | 0,797674055 | 0,892 | 0,665 | 0 | Dentate Gyrus | Slc35f3       |
| 0 | 0,793164218 | 0,95  | 0,843 | 0 | Dentate Gyrus | Rasgrf1       |

|   |             |       |       |   |               |               |
|---|-------------|-------|-------|---|---------------|---------------|
| 0 | 0,792464122 | 0,681 | 0,253 | 0 | Dentate Gyrus | Vav3          |
| 0 | 0,783993385 | 0,864 | 0,46  | 0 | Dentate Gyrus | Frm4b         |
| 0 | 0,782953236 | 1     | 0,98  | 0 | Dentate Gyrus | Fgf14         |
| 0 | 0,777487892 | 1     | 0,978 | 0 | Dentate Gyrus | Celf2         |
| 0 | 0,777458398 | 0,736 | 0,374 | 0 | Dentate Gyrus | Pgbd5         |
| 0 | 0,776506122 | 0,603 | 0,178 | 0 | Dentate Gyrus | F730043M19Rik |
| 0 | 0,776487369 | 0,999 | 0,96  | 0 | Dentate Gyrus | Il1rap1       |
| 0 | 0,775696826 | 0,819 | 0,508 | 0 | Dentate Gyrus | Ptk2b         |
| 0 | 0,774716572 | 0,998 | 0,95  | 0 | Dentate Gyrus | Cttnbp2       |
| 0 | 0,771778566 | 0,92  | 0,783 | 0 | Dentate Gyrus | Mrtfb         |
| 0 | 0,771496573 | 0,683 | 0,292 | 0 | Dentate Gyrus | Adams17       |
| 0 | 0,762048571 | 0,776 | 0,416 | 0 | Dentate Gyrus | 4930509J09Rik |
| 0 | 0,758619663 | 0,734 | 0,358 | 0 | Dentate Gyrus | Olfm1         |
| 0 | 0,757356702 | 0,724 | 0,306 | 0 | Dentate Gyrus | Pde7b         |
| 0 | 0,753512713 | 1     | 0,99  | 0 | Dentate Gyrus | Cadm2         |
| 0 | 0,748332188 | 0,791 | 0,509 | 0 | Dentate Gyrus | Lgi1          |
| 0 | 0,744724908 | 0,937 | 0,828 | 0 | Dentate Gyrus | Kcnj3         |
| 0 | 0,737409694 | 0,996 | 0,949 | 0 | Dentate Gyrus | Gabbr3        |
| 0 | 0,736832264 | 0,79  | 0,472 | 0 | Dentate Gyrus | Wipf3         |
| 0 | 0,736223942 | 0,967 | 0,49  | 0 | Dentate Gyrus | Dock10        |
| 0 | 0,728994141 | 0,858 | 0,682 | 0 | Dentate Gyrus | Add2          |
| 0 | 0,727696898 | 0,849 | 0,647 | 0 | Dentate Gyrus | Dapk1         |
| 0 | 0,717874713 | 0,999 | 0,99  | 0 | Dentate Gyrus | Mycbp2        |
| 0 | 0,716820195 | 0,779 | 0,431 | 0 | Dentate Gyrus | Slc44a5       |
| 0 | 0,708877869 | 0,9   | 0,626 | 0 | Dentate Gyrus | Iqgap2        |
| 0 | 0,706166485 | 0,593 | 0,203 | 0 | Dentate Gyrus | Kif26b        |
| 0 | 0,700817414 | 0,932 | 0,86  | 0 | Dentate Gyrus | Nedd4l        |
| 0 | 0,700111345 | 0,788 | 0,462 | 0 | Dentate Gyrus | Dpyd          |
| 0 | 0,698927956 | 0,891 | 0,685 | 0 | Dentate Gyrus | A830018L16Rik |
| 0 | 0,697661398 | 0,981 | 0,902 | 0 | Dentate Gyrus | Nebl          |
| 0 | 0,696159147 | 0,981 | 0,928 | 0 | Dentate Gyrus | Dgki          |
| 0 | 0,69588767  | 0,893 | 0,733 | 0 | Dentate Gyrus | Ano3          |
| 0 | 0,694620837 | 0,912 | 0,813 | 0 | Dentate Gyrus | Rgs7bp        |
| 0 | 0,693384896 | 0,686 | 0,371 | 0 | Dentate Gyrus | Cblb          |
| 0 | 0,692123373 | 0,752 | 0,41  | 0 | Dentate Gyrus | Ntng1         |
| 0 | 0,691188319 | 1     | 0,96  | 0 | Dentate Gyrus | Dlgap2        |
| 0 | 0,673864533 | 0,968 | 0,834 | 0 | Dentate Gyrus | Neil2         |
| 0 | 0,670940318 | 0,726 | 0,347 | 0 | Dentate Gyrus | Bcl11b        |
| 0 | 0,670891594 | 0,99  | 0,914 | 0 | Dentate Gyrus | Kctd16        |
| 0 | 0,668759107 | 0,704 | 0,4   | 0 | Dentate Gyrus | Pcdh17        |
| 0 | 0,664117333 | 0,877 | 0,705 | 0 | Dentate Gyrus | Rtn1          |
| 0 | 0,658297228 | 0,621 | 0,326 | 0 | Dentate Gyrus | Cep112        |
| 0 | 0,654964227 | 0,868 | 0,767 | 0 | Dentate Gyrus | Ptprj         |

|   |             |       |       |   |               |          |
|---|-------------|-------|-------|---|---------------|----------|
| 0 | 0,651508864 | 0,504 | 0,155 | 0 | Dentate Gyrus | Calb1    |
| 0 | 0,649425407 | 0,639 | 0,333 | 0 | Dentate Gyrus | Sntb2    |
| 0 | 0,648049861 | 0,988 | 0,818 | 0 | Dentate Gyrus | Ncam2    |
| 0 | 0,644111634 | 0,601 | 0,242 | 0 | Dentate Gyrus | Rasgrf2  |
| 0 | 0,642422318 | 0,821 | 0,62  | 0 | Dentate Gyrus | Elmod1   |
| 0 | 0,641423403 | 0,911 | 0,806 | 0 | Dentate Gyrus | Chn1     |
| 0 | 0,639344717 | 0,702 | 0,408 | 0 | Dentate Gyrus | Snca     |
| 0 | 0,637537993 | 0,941 | 0,879 | 0 | Dentate Gyrus | Plekha5  |
| 0 | 0,630818103 | 0,676 | 0,364 | 0 | Dentate Gyrus | Scn3a    |
| 0 | 0,627807497 | 0,8   | 0,552 | 0 | Dentate Gyrus | Syt7     |
| 0 | 0,627267095 | 0,714 | 0,403 | 0 | Dentate Gyrus | Osbp2    |
| 0 | 0,626862222 | 0,878 | 0,699 | 0 | Dentate Gyrus | Epha4    |
| 0 | 0,626683434 | 0,81  | 0,673 | 0 | Dentate Gyrus | Ralgapa2 |
| 0 | 0,624356577 | 1     | 0,989 | 0 | Dentate Gyrus | Nbea     |
| 0 | 0,622827479 | 0,824 | 0,66  | 0 | Dentate Gyrus | Cers6    |
| 0 | 0,619885815 | 0,644 | 0,336 | 0 | Dentate Gyrus | Arhgap20 |
| 0 | 0,619794154 | 0,637 | 0,351 | 0 | Dentate Gyrus | Clvs2    |
| 0 | 0,607103594 | 0,721 | 0,451 | 0 | Dentate Gyrus | Ppp1r13b |
| 0 | 0,60356068  | 0,877 | 0,78  | 0 | Dentate Gyrus | Eml5     |
| 0 | 0,603268087 | 0,873 | 0,699 | 0 | Dentate Gyrus | Nkain3   |
| 0 | 0,597784745 | 0,558 | 0,327 | 0 | Dentate Gyrus | Hectd2   |
| 0 | 0,597716282 | 0,967 | 0,882 | 0 | Dentate Gyrus | Dscam    |
| 0 | 0,596172459 | 0,532 | 0,194 | 0 | Dentate Gyrus | Mkx      |
| 0 | 0,595077316 | 0,629 | 0,341 | 0 | Dentate Gyrus | Gabra4   |
| 0 | 0,594807444 | 0,737 | 0,429 | 0 | Dentate Gyrus | Lmo7     |
| 0 | 0,593633835 | 0,712 | 0,433 | 0 | Dentate Gyrus | Gfod1    |
| 0 | 0,593104489 | 0,87  | 0,79  | 0 | Dentate Gyrus | Tmem132b |
| 0 | 0,591788827 | 0,547 | 0,226 | 0 | Dentate Gyrus | Gnal     |
| 0 | 0,59076646  | 0,957 | 0,902 | 0 | Dentate Gyrus | Cacna1d  |
| 0 | 0,586978793 | 0,987 | 0,948 | 0 | Dentate Gyrus | Tnik     |
| 0 | 0,584284027 | 1     | 0,978 | 0 | Dentate Gyrus | Fam155a  |
| 0 | 0,583415261 | 0,712 | 0,464 | 0 | Dentate Gyrus | Gabrg2   |
| 0 | 0,581330908 | 1     | 0,987 | 0 | Dentate Gyrus | Dlg2     |
| 0 | 0,57666619  | 0,586 | 0,275 | 0 | Dentate Gyrus | Rras2    |
| 0 | 0,574961261 | 0,548 | 0,227 | 0 | Dentate Gyrus | Cplx2    |
| 0 | 0,574246266 | 0,811 | 0,635 | 0 | Dentate Gyrus | Nrp1     |
| 0 | 0,574210572 | 0,866 | 0,757 | 0 | Dentate Gyrus | Diaph2   |
| 0 | 0,573958847 | 0,52  | 0,191 | 0 | Dentate Gyrus | Ablim3   |
| 0 | 0,573592654 | 0,865 | 0,694 | 0 | Dentate Gyrus | Kcnt2    |
| 0 | 0,572857614 | 0,922 | 0,837 | 0 | Dentate Gyrus | Sorbs1   |
| 0 | 0,572323636 | 0,673 | 0,389 | 0 | Dentate Gyrus | Carmil1  |
| 0 | 0,565239241 | 0,715 | 0,432 | 0 | Dentate Gyrus | Fstl4    |
| 0 | 0,563620669 | 0,982 | 0,887 | 0 | Dentate Gyrus | Nfib     |

|   |             |       |       |   |               |          |
|---|-------------|-------|-------|---|---------------|----------|
| 0 | 0,563511188 | 0,873 | 0,795 | 0 | Dentate Gyrus | Sybu     |
| 0 | 0,561669628 | 0,957 | 0,894 | 0 | Dentate Gyrus | Sorbs2   |
| 0 | 0,559852531 | 0,915 | 0,836 | 0 | Dentate Gyrus | Rbfox3   |
| 0 | 0,557935303 | 0,527 | 0,207 | 0 | Dentate Gyrus | Kcnc3    |
| 0 | 0,556332782 | 0,905 | 0,799 | 0 | Dentate Gyrus | Atrnl1   |
| 0 | 0,55470073  | 0,696 | 0,405 | 0 | Dentate Gyrus | Baiap2   |
| 0 | 0,55410238  | 0,788 | 0,632 | 0 | Dentate Gyrus | Sez6l    |
| 0 | 0,552943803 | 1     | 0,989 | 0 | Dentate Gyrus | Ank3     |
| 0 | 0,551649905 | 0,769 | 0,545 | 0 | Dentate Gyrus | Wasf1    |
| 0 | 0,5415687   | 0,737 | 0,494 | 0 | Dentate Gyrus | Ndrgr4   |
| 0 | 0,53856426  | 0,953 | 0,848 | 0 | Dentate Gyrus | Tnr      |
| 0 | 0,535457758 | 0,858 | 0,728 | 0 | Dentate Gyrus | Gabra2   |
| 0 | 0,534425228 | 0,702 | 0,44  | 0 | Dentate Gyrus | Gm15738  |
| 0 | 0,533593224 | 0,548 | 0,259 | 0 | Dentate Gyrus | Btbd3    |
| 0 | 0,533451711 | 0,611 | 0,326 | 0 | Dentate Gyrus | Mtmr12   |
| 0 | 0,532579819 | 0,727 | 0,447 | 0 | Dentate Gyrus | Sipa113  |
| 0 | 0,531550561 | 0,897 | 0,821 | 0 | Dentate Gyrus | Gabbr2   |
| 0 | 0,530056401 | 0,771 | 0,516 | 0 | Dentate Gyrus | Rnf112   |
| 0 | 0,528768337 | 0,65  | 0,404 | 0 | Dentate Gyrus | Arsb     |
| 0 | 0,520515238 | 0,729 | 0,431 | 0 | Dentate Gyrus | Spock3   |
| 0 | 0,518536245 | 1     | 0,97  | 0 | Dentate Gyrus | Lrrc7    |
| 0 | 0,518465798 | 0,979 | 0,898 | 0 | Dentate Gyrus | Cacna2d1 |
| 0 | 0,516860698 | 0,635 | 0,33  | 0 | Dentate Gyrus | Ptpre    |
| 0 | 0,51142724  | 0,999 | 0,983 | 0 | Dentate Gyrus | Gria2    |
| 0 | 0,51123118  | 0,846 | 0,746 | 0 | Dentate Gyrus | Cdh12    |
| 0 | 0,511106271 | 0,762 | 0,567 | 0 | Dentate Gyrus | Kcnd3    |
| 0 | 0,509255291 | 0,866 | 0,743 | 0 | Dentate Gyrus | Dgkg     |
| 0 | 0,508931802 | 0,657 | 0,374 | 0 | Dentate Gyrus | Xpr1     |
| 0 | 0,508170362 | 0,912 | 0,877 | 0 | Dentate Gyrus | Pde4dip  |
| 0 | 0,506338576 | 0,972 | 0,927 | 0 | Dentate Gyrus | Syne1    |
| 0 | 0,50469735  | 0,582 | 0,366 | 0 | Dentate Gyrus | Syn3     |
| 0 | 0,503025986 | 0,816 | 0,702 | 0 | Dentate Gyrus | Pakap    |
| 0 | 0,502204225 | 0,954 | 0,907 | 0 | Dentate Gyrus | Cdk14    |
| 0 | 0,500977403 | 0,894 | 0,833 | 0 | Dentate Gyrus | Rapgef2  |

|           |             |       |       |           |                    |          |
|-----------|-------------|-------|-------|-----------|--------------------|----------|
| 0         | 1,836698827 | 0,997 | 0,811 | 0         | Intermediate cells | Zbtb20   |
| 0         | 1,547422658 | 0,994 | 0,896 | 0         | Intermediate cells | Nfib     |
| 0         | 1,525462196 | 0,994 | 0,936 | 0         | Intermediate cells | Mir99ahg |
| 0         | 1,27423957  | 0,71  | 0,272 | 0         | Intermediate cells | Ttc28    |
| 0         | 1,136908105 | 0,974 | 0,517 | 0         | Intermediate cells | Gm42418  |
| 0         | 1,111250749 | 0,561 | 0,149 | 0         | Intermediate cells | Sncaip   |
| 1,47E-307 | 1,292845034 | 0,987 | 0,726 | 3,97E-303 | Intermediate cells | Nfia     |
| 2,71E-302 | 1,202482265 | 0,997 | 0,988 | 7,30E-298 | Intermediate cells | Ctnna2   |

|           |             |       |       |           |                    |               |
|-----------|-------------|-------|-------|-----------|--------------------|---------------|
| 2,26E-286 | 1,11008312  | 0,999 | 0,986 | 6,08E-282 | Intermediate cells | Tcf4          |
| 3,15E-285 | 1,694836848 | 0,989 | 0,895 | 8,47E-281 | Intermediate cells | Dcc           |
| 1,53E-215 | 1,11640121  | 0,918 | 0,763 | 4,12E-211 | Intermediate cells | Nol4          |
| 6,34E-207 | 1,111273079 | 0,945 | 0,703 | 1,71E-202 | Intermediate cells | Zfpm2         |
| 9,01E-199 | 0,965384832 | 0,999 | 0,988 | 2,43E-194 | Intermediate cells | Auts2         |
| 3,86E-184 | 0,909379764 | 0,991 | 0,935 | 1,04E-179 | Intermediate cells | Pbx1          |
| 4,51E-175 | 0,858531505 | 0,55  | 0,237 | 1,21E-170 | Intermediate cells | Mtss1         |
| 4,57E-175 | 0,903971276 | 0,538 | 0,221 | 1,23E-170 | Intermediate cells | Prox1         |
| 1,69E-165 | 0,573586521 | 1     | 0,991 | 4,55E-161 | Intermediate cells | Nrxn1         |
| 1,66E-159 | 1,214353929 | 0,63  | 0,327 | 4,47E-155 | Intermediate cells | Sema5a        |
| 8,14E-158 | 1,180141363 | 0,52  | 0,245 | 2,19E-153 | Intermediate cells | Ptpro         |
| 2,87E-156 | 0,669781393 | 0,991 | 0,934 | 7,73E-152 | Intermediate cells | Map2          |
| 3,19E-128 | 0,745065536 | 0,885 | 0,809 | 8,59E-124 | Intermediate cells | C130071C03Rik |
| 6,67E-118 | 1,012204341 | 0,679 | 0,514 | 1,80E-113 | Intermediate cells | Plxna2        |
| 1,13E-116 | 0,799049062 | 0,767 | 0,631 | 3,04E-112 | Intermediate cells | Nav1          |
| 5,02E-116 | 0,691058209 | 0,935 | 0,867 | 1,35E-111 | Intermediate cells | Nedd4l        |
| 1,66E-111 | 0,729684892 | 0,856 | 0,58  | 4,47E-107 | Intermediate cells | Pcdh15        |
| 1,72E-103 | 0,658809043 | 0,824 | 0,66  | 4,64E-99  | Intermediate cells | Klf12         |
| 5,52E-100 | 0,528087472 | 0,987 | 0,913 | 1,49E-95  | Intermediate cells | Ncam1         |
| 3,98E-99  | 0,733924852 | 0,928 | 0,736 | 1,07E-94  | Intermediate cells | Sema6d        |
| 7,76E-97  | 0,747396746 | 0,526 | 0,3   | 2,09E-92  | Intermediate cells | Nnat          |
| 3,17E-94  | 0,673501403 | 0,518 | 0,297 | 8,53E-90  | Intermediate cells | Zmiz1         |
| 3,95E-93  | 0,695427234 | 0,626 | 0,451 | 1,06E-88  | Intermediate cells | Nfix          |
| 3,72E-91  | 0,747920436 | 0,687 | 0,518 | 1,00E-86  | Intermediate cells | Bach2         |
| 2,50E-88  | 0,545745946 | 0,891 | 0,782 | 6,73E-84  | Intermediate cells | Hnrmpa2b1     |
| 6,88E-85  | 0,826366012 | 0,708 | 0,503 | 1,85E-80  | Intermediate cells | Frd4b         |
| 5,67E-79  | 0,632467919 | 0,57  | 0,375 | 1,53E-74  | Intermediate cells | Fgf13         |
| 1,20E-78  | 0,638186082 | 0,982 | 0,971 | 3,23E-74  | Intermediate cells | Ccser1        |
| 1,81E-76  | 0,885981658 | 0,872 | 0,771 | 4,86E-72  | Intermediate cells | Mctp1         |
| 4,24E-76  | 0,606888097 | 0,787 | 0,68  | 1,14E-71  | Intermediate cells | Fmnl2         |
| 5,26E-74  | 0,681940769 | 0,967 | 0,931 | 1,42E-69  | Intermediate cells | Setbp1        |
| 9,32E-74  | 0,531176987 | 0,973 | 0,952 | 2,51E-69  | Intermediate cells | Tanc2         |
| 1,73E-67  | 0,617838104 | 0,556 | 0,389 | 4,66E-63  | Intermediate cells | C530008M17Rik |
| 2,17E-66  | 0,654409516 | 0,582 | 0,446 | 5,86E-62  | Intermediate cells | Lncppara      |
| 1,53E-64  | 0,934557775 | 0,877 | 0,758 | 4,12E-60  | Intermediate cells | Cntnap5a      |
| 7,70E-63  | 0,561211086 | 0,824 | 0,783 | 2,07E-58  | Intermediate cells | Ptprs         |
| 1,03E-61  | 0,574359524 | 0,961 | 0,913 | 2,77E-57  | Intermediate cells | Cacna1c       |
| 1,42E-59  | 0,653912566 | 0,516 | 0,353 | 3,83E-55  | Intermediate cells | Tead1         |
| 3,65E-59  | 0,611176028 | 0,514 | 0,356 | 9,83E-55  | Intermediate cells | Sh3kbp1       |
| 4,03E-56  | 0,54923997  | 0,967 | 0,909 | 1,09E-51  | Intermediate cells | Kcnb2         |
| 1,01E-53  | 0,500695332 | 0,684 | 0,594 | 2,72E-49  | Intermediate cells | Igf1r         |
| 1,30E-52  | 0,729470166 | 0,706 | 0,644 | 3,51E-48  | Intermediate cells | Zeb1          |
| 1,44E-48  | 0,547812009 | 0,552 | 0,391 | 3,87E-44  | Intermediate cells | Maml3         |

|          |             |       |       |          |                    |          |
|----------|-------------|-------|-------|----------|--------------------|----------|
| 3,42E-48 | 0,530045663 | 0,915 | 0,814 | 9,22E-44 | Intermediate cells | Robo1    |
| 4,29E-46 | 0,552622439 | 0,619 | 0,534 | 1,16E-41 | Intermediate cells | Neo1     |
| 1,12E-43 | 0,501391261 | 0,578 | 0,477 | 3,00E-39 | Intermediate cells | Akap9    |
| 9,76E-41 | 0,64792302  | 0,851 | 0,723 | 2,63E-36 | Intermediate cells | Mir100hg |
| 1,20E-39 | 0,552625072 | 0,754 | 0,718 | 3,23E-35 | Intermediate cells | Hecw1    |
| 1,61E-39 | 0,528629251 | 0,625 | 0,555 | 4,33E-35 | Intermediate cells | Dleu2    |
| 1,99E-36 | 0,528009606 | 0,671 | 0,646 | 5,36E-32 | Intermediate cells | Gramd1b  |
| 1,01E-27 | 0,620317157 | 0,694 | 0,654 | 2,73E-23 | Intermediate cells | Nrp1     |

|   |             |       |       |   |                 |               |
|---|-------------|-------|-------|---|-----------------|---------------|
| 0 | 2,923935098 | 0,983 | 0,281 | 0 | Pyramidal (NFM) | Cdh18         |
| 0 | 2,742610307 | 1     | 0,629 | 0 | Pyramidal (NFM) | Dpp10         |
| 0 | 2,14163021  | 0,999 | 0,55  | 0 | Pyramidal (NFM) | Hs3st4        |
| 0 | 2,065262193 | 1     | 0,738 | 0 | Pyramidal (NFM) | Etl4          |
| 0 | 1,767114244 | 0,928 | 0,309 | 0 | Pyramidal (NFM) | Garnl3        |
| 0 | 1,732773507 | 0,952 | 0,367 | 0 | Pyramidal (NFM) | Dlc1          |
| 0 | 1,654461259 | 0,732 | 0,086 | 0 | Pyramidal (NFM) | Foxp2         |
| 0 | 1,649197906 | 0,867 | 0,444 | 0 | Pyramidal (NFM) | Thsd7b        |
| 0 | 1,579886958 | 0,989 | 0,705 | 0 | Pyramidal (NFM) | Pde1a         |
| 0 | 1,55715714  | 0,725 | 0,451 | 0 | Pyramidal (NFM) | Brinp3        |
| 0 | 1,507430439 | 0,871 | 0,282 | 0 | Pyramidal (NFM) | Grm8          |
| 0 | 1,41044204  | 0,841 | 0,228 | 0 | Pyramidal (NFM) | Sdk2          |
| 0 | 1,409757958 | 0,852 | 0,216 | 0 | Pyramidal (NFM) | Grik3         |
| 0 | 1,38491337  | 0,93  | 0,422 | 0 | Pyramidal (NFM) | Tle4          |
| 0 | 1,368442222 | 0,837 | 0,289 | 0 | Pyramidal (NFM) | Htr1f         |
| 0 | 1,367278118 | 0,954 | 0,518 | 0 | Pyramidal (NFM) | Slc35f1       |
| 0 | 1,343621072 | 0,938 | 0,508 | 0 | Pyramidal (NFM) | Chsy3         |
| 0 | 1,333883716 | 0,998 | 0,949 | 0 | Pyramidal (NFM) | Frmpd4        |
| 0 | 1,310954091 | 0,979 | 0,745 | 0 | Pyramidal (NFM) | Nrg1          |
| 0 | 1,284565657 | 0,741 | 0,152 | 0 | Pyramidal (NFM) | Cntnap4       |
| 0 | 1,272878706 | 1     | 0,955 | 0 | Pyramidal (NFM) | Ptprd         |
| 0 | 1,221725349 | 0,988 | 0,915 | 0 | Pyramidal (NFM) | Pde4d         |
| 0 | 1,190661438 | 1     | 0,92  | 0 | Pyramidal (NFM) | Arpp21        |
| 0 | 1,190340507 | 0,941 | 0,572 | 0 | Pyramidal (NFM) | Fut9          |
| 0 | 1,144799866 | 0,957 | 0,702 | 0 | Pyramidal (NFM) | A830018L16Rik |
| 0 | 1,143629955 | 0,972 | 0,745 | 0 | Pyramidal (NFM) | Ano3          |
| 0 | 1,115399835 | 0,774 | 0,332 | 0 | Pyramidal (NFM) | Tmem178       |
| 0 | 1,111188617 | 0,86  | 0,324 | 0 | Pyramidal (NFM) | Rasgef1b      |
| 0 | 1,102068648 | 1     | 0,972 | 0 | Pyramidal (NFM) | Phactr1       |
| 0 | 1,093722295 | 0,933 | 0,546 | 0 | Pyramidal (NFM) | Lrrtm3        |
| 0 | 1,085042761 | 0,975 | 0,857 | 0 | Pyramidal (NFM) | Mmp16         |
| 0 | 1,071152872 | 0,981 | 0,774 | 0 | Pyramidal (NFM) | Agbl4         |
| 0 | 1,061387328 | 0,933 | 0,699 | 0 | Pyramidal (NFM) | Zfpm2         |
| 0 | 1,047756972 | 0,701 | 0,289 | 0 | Pyramidal (NFM) | Pcsk5         |

|   |             |       |       |   |                 |               |
|---|-------------|-------|-------|---|-----------------|---------------|
| 0 | 1,04177462  | 0,695 | 0,309 | 0 | Pyramidal (NFM) | Pdzn4         |
| 0 | 1,036036725 | 0,679 | 0,153 | 0 | Pyramidal (NFM) | Oprm1         |
| 0 | 1,025715458 | 0,997 | 0,934 | 0 | Pyramidal (NFM) | Pbx1          |
| 0 | 1,021425325 | 0,916 | 0,527 | 0 | Pyramidal (NFM) | Ncald         |
| 0 | 1,000807513 | 0,626 | 0,07  | 0 | Pyramidal (NFM) | Rai14         |
| 0 | 0,980175251 | 0,993 | 0,904 | 0 | Pyramidal (NFM) | Asic2         |
| 0 | 0,978630349 | 0,98  | 0,713 | 0 | Pyramidal (NFM) | Khdrbs3       |
| 0 | 0,972898416 | 0,621 | 0,168 | 0 | Pyramidal (NFM) | Plcxd3        |
| 0 | 0,971252621 | 0,942 | 0,642 | 0 | Pyramidal (NFM) | Cntn4         |
| 0 | 0,958537833 | 0,991 | 0,792 | 0 | Pyramidal (NFM) | Kcnh7         |
| 0 | 0,952812829 | 0,966 | 0,887 | 0 | Pyramidal (NFM) | Celf4         |
| 0 | 0,936244354 | 1     | 0,989 | 0 | Pyramidal (NFM) | Dlg2          |
| 0 | 0,92749681  | 0,973 | 0,819 | 0 | Pyramidal (NFM) | Ext1          |
| 0 | 0,925861595 | 0,988 | 0,884 | 0 | Pyramidal (NFM) | Rims2         |
| 0 | 0,925377349 | 1     | 0,967 | 0 | Pyramidal (NFM) | Ahi1          |
| 0 | 0,913042236 | 1     | 0,989 | 0 | Pyramidal (NFM) | Mdga2         |
| 0 | 0,912592158 | 0,812 | 0,444 | 0 | Pyramidal (NFM) | Slc35f4       |
| 0 | 0,912575508 | 0,688 | 0,309 | 0 | Pyramidal (NFM) | Tmem132d      |
| 0 | 0,878324568 | 0,608 | 0,144 | 0 | Pyramidal (NFM) | Igsf21        |
| 0 | 0,87285609  | 0,951 | 0,861 | 0 | Pyramidal (NFM) | Gm26871       |
| 0 | 0,863290564 | 0,994 | 0,92  | 0 | Pyramidal (NFM) | Gria3         |
| 0 | 0,858032083 | 0,85  | 0,443 | 0 | Pyramidal (NFM) | Camk4         |
| 0 | 0,857590592 | 0,782 | 0,311 | 0 | Pyramidal (NFM) | Fnbp11        |
| 0 | 0,853344093 | 0,96  | 0,767 | 0 | Pyramidal (NFM) | Mctp1         |
| 0 | 0,850704713 | 0,915 | 0,697 | 0 | Pyramidal (NFM) | Sh3gl2        |
| 0 | 0,850458087 | 1     | 0,978 | 0 | Pyramidal (NFM) | Nav3          |
| 0 | 0,847311521 | 0,997 | 0,914 | 0 | Pyramidal (NFM) | Snap25        |
| 0 | 0,844324533 | 0,734 | 0,27  | 0 | Pyramidal (NFM) | Tshz3         |
| 0 | 0,839347367 | 0,956 | 0,759 | 0 | Pyramidal (NFM) | Prkcb         |
| 0 | 0,838529095 | 0,546 | 0,102 | 0 | Pyramidal (NFM) | Hs3st2        |
| 0 | 0,836611036 | 0,58  | 0,117 | 0 | Pyramidal (NFM) | Ipcef1        |
| 0 | 0,825733141 | 1     | 0,982 | 0 | Pyramidal (NFM) | Nrg3          |
| 0 | 0,823680744 | 0,958 | 0,668 | 0 | Pyramidal (NFM) | Ctnna3        |
| 0 | 0,820703723 | 0,9   | 0,705 | 0 | Pyramidal (NFM) | Nos1ap        |
| 0 | 0,806189354 | 0,952 | 0,743 | 0 | Pyramidal (NFM) | Hecw2         |
| 0 | 0,805873897 | 0,967 | 0,834 | 0 | Pyramidal (NFM) | 5730522E02Rik |
| 0 | 0,796815428 | 0,846 | 0,493 | 0 | Pyramidal (NFM) | Gas7          |
| 0 | 0,795400986 | 0,819 | 0,377 | 0 | Pyramidal (NFM) | Ldb2          |
| 0 | 0,793939757 | 0,854 | 0,406 | 0 | Pyramidal (NFM) | Sv2b          |
| 0 | 0,772384838 | 0,923 | 0,788 | 0 | Pyramidal (NFM) | Khdrbs2       |
| 0 | 0,764597062 | 0,929 | 0,82  | 0 | Pyramidal (NFM) | Cacnb4        |
| 0 | 0,762026626 | 0,994 | 0,938 | 0 | Pyramidal (NFM) | Prickle1      |
| 0 | 0,756266127 | 0,963 | 0,884 | 0 | Pyramidal (NFM) | Samd12        |

|           |             |       |       |           |                 |               |
|-----------|-------------|-------|-------|-----------|-----------------|---------------|
| 0         | 0,751164177 | 0,999 | 0,968 | 0         | Pyramidal (NFM) | Kcnma1        |
| 0         | 0,750812351 | 0,952 | 0,807 | 0         | Pyramidal (NFM) | Slc4a10       |
| 0         | 0,750455486 | 0,598 | 0,166 | 0         | Pyramidal (NFM) | Vxn           |
| 0         | 0,746672521 | 0,774 | 0,391 | 0         | Pyramidal (NFM) | Flrt2         |
| 0         | 0,737934267 | 0,586 | 0,15  | 0         | Pyramidal (NFM) | Atp2b4        |
| 0         | 0,731507882 | 0,89  | 0,562 | 0         | Pyramidal (NFM) | Sox5          |
| 0         | 0,730679818 | 0,99  | 0,951 | 0         | Pyramidal (NFM) | Tanc2         |
| 0         | 0,729015916 | 0,777 | 0,381 | 0         | Pyramidal (NFM) | Esrrg         |
| 0         | 0,728375487 | 1     | 0,98  | 0         | Pyramidal (NFM) | Fam155a       |
| 0         | 0,724948109 | 1     | 0,977 | 0         | Pyramidal (NFM) | Syt1          |
| 0         | 0,722799179 | 0,792 | 0,417 | 0         | Pyramidal (NFM) | Kcnip3        |
| 0         | 0,713112018 | 0,708 | 0,281 | 0         | Pyramidal (NFM) | Mpped1        |
| 0         | 0,689988593 | 0,571 | 0,151 | 0         | Pyramidal (NFM) | Adgra1        |
| 0         | 0,680941978 | 0,921 | 0,774 | 0         | Pyramidal (NFM) | Cdh11         |
| 0         | 0,680227492 | 1     | 0,988 | 0         | Pyramidal (NFM) | Adgrb3        |
| 0         | 0,67743675  | 1     | 0,987 | 0         | Pyramidal (NFM) | Csmd1         |
| 0         | 0,676231698 | 0,968 | 0,895 | 0         | Pyramidal (NFM) | Ptk2          |
| 0         | 0,676182454 | 0,797 | 0,455 | 0         | Pyramidal (NFM) | Srrm4         |
| 0         | 0,674251646 | 0,615 | 0,251 | 0         | Pyramidal (NFM) | Osbp110       |
| 0         | 0,669198844 | 0,909 | 0,72  | 0         | Pyramidal (NFM) | Tenm1         |
| 0         | 0,660763994 | 0,997 | 0,967 | 0         | Pyramidal (NFM) | Rims1         |
| 0         | 0,66073275  | 1     | 0,981 | 0         | Pyramidal (NFM) | Fgf14         |
| 0         | 0,660288944 | 0,921 | 0,575 | 0         | Pyramidal (NFM) | Sgcz          |
| 0         | 0,653830907 | 0,792 | 0,509 | 0         | Pyramidal (NFM) | Plxna2        |
| 0         | 0,653801122 | 0,966 | 0,895 | 0         | Pyramidal (NFM) | Dock3         |
| 0         | 0,648689263 | 1     | 0,991 | 0         | Pyramidal (NFM) | Nrxn1         |
| 0         | 0,647885507 | 0,919 | 0,712 | 0         | Pyramidal (NFM) | Asap1         |
| 0         | 0,64623452  | 0,994 | 0,951 | 0         | Pyramidal (NFM) | Myt11         |
| 0         | 0,641206713 | 0,981 | 0,898 | 0         | Pyramidal (NFM) | Pcsk2         |
| 0         | 0,627136701 | 0,872 | 0,592 | 0         | Pyramidal (NFM) | Xylt1         |
| 0         | 0,622711651 | 0,652 | 0,288 | 0         | Pyramidal (NFM) | Sel1l3        |
| 0         | 0,619883522 | 0,929 | 0,787 | 0         | Pyramidal (NFM) | A230057D06Rik |
| 0         | 0,613399356 | 0,945 | 0,838 | 0         | Pyramidal (NFM) | Dync111       |
| 0         | 0,601637629 | 0,598 | 0,258 | 0         | Pyramidal (NFM) | Galnt9        |
| 0         | 0,594470338 | 0,994 | 0,966 | 0         | Pyramidal (NFM) | Strbp         |
| 0         | 0,588326956 | 0,632 | 0,293 | 0         | Pyramidal (NFM) | B230209E15Rik |
| 0         | 0,571123534 | 1     | 0,987 | 0         | Pyramidal (NFM) | Pcdh9         |
| 0         | 0,570285162 | 0,624 | 0,291 | 0         | Pyramidal (NFM) | Elavl4        |
| 0         | 0,533907835 | 0,91  | 0,555 | 0         | Pyramidal (NFM) | Grm3          |
| 0         | 0,520366287 | 0,509 | 0,19  | 0         | Pyramidal (NFM) | St6gal2       |
| 0         | 0,515368447 | 0,519 | 0,212 | 0         | Pyramidal (NFM) | Etv5          |
| 1,39E-303 | 0,547889188 | 0,581 | 0,265 | 3,73E-299 | Pyramidal (NFM) | Igsf9b        |
| 1,71E-302 | 0,592708801 | 0,793 | 0,486 | 4,60E-298 | Pyramidal (NFM) | A330076H08Rik |

|           |             |       |       |           |                 |          |
|-----------|-------------|-------|-------|-----------|-----------------|----------|
| 2,70E-299 | 0,666428202 | 1     | 0,905 | 7,28E-295 | Pyramidal (NFM) | Snhg11   |
| 2,02E-297 | 0,703046704 | 0,699 | 0,355 | 5,43E-293 | Pyramidal (NFM) | Rgs6     |
| 2,26E-297 | 0,626837337 | 0,989 | 0,925 | 6,09E-293 | Pyramidal (NFM) | Dmd      |
| 2,82E-295 | 0,539578556 | 0,67  | 0,344 | 7,59E-291 | Pyramidal (NFM) | Rap1gap2 |
| 2,43E-291 | 0,501852908 | 0,631 | 0,299 | 6,54E-287 | Pyramidal (NFM) | Rasgrp1  |
| 7,78E-291 | 0,614080424 | 0,996 | 0,879 | 2,10E-286 | Pyramidal (NFM) | Slc8a1   |
| 4,51E-290 | 0,517503329 | 0,96  | 0,905 | 1,22E-285 | Pyramidal (NFM) | Unc80    |
| 4,89E-289 | 0,527051153 | 0,984 | 0,931 | 1,32E-284 | Pyramidal (NFM) | Fgf12    |
| 5,85E-287 | 0,633330238 | 0,81  | 0,548 | 1,58E-282 | Pyramidal (NFM) | Syt16    |
| 1,47E-283 | 0,569362086 | 0,915 | 0,808 | 3,96E-279 | Pyramidal (NFM) | Atrnl1   |
| 3,73E-281 | 0,58737423  | 0,997 | 0,931 | 1,01E-276 | Pyramidal (NFM) | Raly1    |
| 1,55E-277 | 0,672736268 | 0,662 | 0,355 | 4,17E-273 | Pyramidal (NFM) | Brinp2   |
| 7,42E-273 | 0,580170928 | 0,662 | 0,342 | 2,00E-268 | Pyramidal (NFM) | Npas2    |
| 1,06E-269 | 0,543441188 | 0,981 | 0,941 | 2,86E-265 | Pyramidal (NFM) | Mapk10   |
| 1,69E-269 | 0,534902406 | 0,981 | 0,913 | 4,55E-265 | Pyramidal (NFM) | Oxr1     |
| 9,02E-265 | 0,820265533 | 0,726 | 0,423 | 2,43E-260 | Pyramidal (NFM) | Homer1   |
| 1,74E-264 | 0,572109676 | 0,72  | 0,416 | 4,69E-260 | Pyramidal (NFM) | Efr3a    |
| 2,22E-264 | 0,559791885 | 0,946 | 0,88  | 5,98E-260 | Pyramidal (NFM) | Nrg3os   |
| 2,12E-263 | 0,533185532 | 0,898 | 0,762 | 5,70E-259 | Pyramidal (NFM) | Atp2b2   |
| 3,47E-259 | 0,512644731 | 0,694 | 0,378 | 9,34E-255 | Pyramidal (NFM) | Pfkip    |
| 2,81E-258 | 0,689427477 | 0,839 | 0,669 | 7,58E-254 | Pyramidal (NFM) | Caln1    |
| 3,44E-251 | 0,537696509 | 0,688 | 0,399 | 9,27E-247 | Pyramidal (NFM) | Arhgap44 |
| 6,68E-251 | 0,552589943 | 0,509 | 0,23  | 1,80E-246 | Pyramidal (NFM) | Olfm3    |
| 5,47E-250 | 0,520356859 | 0,547 | 0,257 | 1,47E-245 | Pyramidal (NFM) | Gng12    |
| 6,95E-250 | 0,717879784 | 0,589 | 0,308 | 1,87E-245 | Pyramidal (NFM) | Serpini1 |
| 8,17E-250 | 0,587234044 | 0,849 | 0,694 | 2,20E-245 | Pyramidal (NFM) | Dtnb     |
| 1,02E-245 | 0,552167407 | 0,866 | 0,677 | 2,74E-241 | Pyramidal (NFM) | Arhgap26 |
| 1,41E-244 | 0,526134254 | 0,94  | 0,866 | 3,81E-240 | Pyramidal (NFM) | Gm20642  |
| 3,84E-244 | 0,539162943 | 0,998 | 0,952 | 1,04E-239 | Pyramidal (NFM) | Negr1    |
| 4,67E-242 | 0,514807894 | 0,793 | 0,51  | 1,26E-237 | Pyramidal (NFM) | Ablim1   |
| 5,62E-242 | 0,514535906 | 0,925 | 0,725 | 1,51E-237 | Pyramidal (NFM) | Chrm3    |
| 6,71E-242 | 0,574960086 | 0,891 | 0,796 | 1,81E-237 | Pyramidal (NFM) | Csm2     |
| 2,03E-239 | 0,550489784 | 0,764 | 0,46  | 5,46E-235 | Pyramidal (NFM) | Arap2    |
| 2,25E-239 | 0,535975614 | 0,665 | 0,364 | 6,06E-235 | Pyramidal (NFM) | Fmn1     |
| 2,90E-238 | 0,674167541 | 0,865 | 0,662 | 7,80E-234 | Pyramidal (NFM) | Astn2    |
| 6,97E-238 | 0,500168085 | 0,648 | 0,354 | 1,88E-233 | Pyramidal (NFM) | 11. Sep  |
| 6,07E-234 | 0,532885206 | 0,935 | 0,719 | 1,63E-229 | Pyramidal (NFM) | Mir100hg |
| 3,67E-231 | 0,523718506 | 0,709 | 0,422 | 9,90E-227 | Pyramidal (NFM) | Plcl2    |
| 1,19E-228 | 0,582989317 | 0,834 | 0,577 | 3,22E-224 | Pyramidal (NFM) | Pcdh15   |
| 2,10E-223 | 0,553337524 | 0,551 | 0,283 | 5,67E-219 | Pyramidal (NFM) | Map3k5   |
| 3,65E-221 | 0,566401458 | 1     | 0,978 | 9,82E-217 | Pyramidal (NFM) | Meg3     |
| 1,09E-217 | 0,526684329 | 0,531 | 0,258 | 2,94E-213 | Pyramidal (NFM) | Satb2    |
| 1,27E-210 | 0,577725525 | 0,943 | 0,89  | 3,42E-206 | Pyramidal (NFM) | Pde10a   |

|           |             |       |       |           |                 |         |
|-----------|-------------|-------|-------|-----------|-----------------|---------|
| 3,43E-203 | 0,523045694 | 0,989 | 0,945 | 9,24E-199 | Pyramidal (NFM) | Nrxn3   |
| 7,08E-199 | 0,590396449 | 1     | 0,979 | 1,91E-194 | Pyramidal (NFM) | Rbfox1  |
| 1,69E-189 | 0,857684813 | 0,593 | 0,361 | 4,54E-185 | Pyramidal (NFM) | Meis2   |
| 4,81E-172 | 0,610182537 | 0,797 | 0,666 | 1,30E-167 | Pyramidal (NFM) | Smyd3   |
| 1,36E-171 | 0,570365368 | 0,769 | 0,615 | 3,65E-167 | Pyramidal (NFM) | Me3     |
| 6,35E-163 | 0,923193049 | 0,782 | 0,646 | 1,71E-158 | Pyramidal (NFM) | Mgat4c  |
| 4,18E-140 | 0,548576983 | 0,777 | 0,618 | 1,13E-135 | Pyramidal (NFM) | Car10   |
| 4,10E-97  | 0,599147717 | 0,613 | 0,423 | 1,10E-92  | Pyramidal (NFM) | Gm49678 |
| 2,04E-87  | 0,540311543 | 0,781 | 0,724 | 5,49E-83  | Pyramidal (NFM) | Pcdh7   |

|   |             |       |       |   |                 |               |
|---|-------------|-------|-------|---|-----------------|---------------|
| 0 | 3,310532364 | 0,646 | 0,112 | 0 | Pyramidal (NFV) | Ptgs          |
| 0 | 2,779201605 | 0,653 | 0,067 | 0 | Pyramidal (NFV) | Slc7a11       |
| 0 | 2,696459381 | 0,911 | 0,035 | 0 | Pyramidal (NFV) | Cped1         |
| 0 | 2,403801911 | 0,568 | 0,052 | 0 | Pyramidal (NFV) | Ranbp3l       |
| 0 | 2,387897224 | 0,591 | 0,019 | 0 | Pyramidal (NFV) | Slc6a20a      |
| 0 | 2,200712377 | 0,697 | 0,16  | 0 | Pyramidal (NFV) | Atp1a2        |
| 0 | 2,140206012 | 0,679 | 0,151 | 0 | Pyramidal (NFV) | Adam12        |
| 0 | 2,109810145 | 0,893 | 0,619 | 0 | Pyramidal (NFV) | Alcam         |
| 0 | 1,960885493 | 0,728 | 0,389 | 0 | Pyramidal (NFV) | Slc38a2       |
| 0 | 1,893175848 | 0,582 | 0,022 | 0 | Pyramidal (NFV) | Bmp6          |
| 0 | 1,766691423 | 0,662 | 0,245 | 0 | Pyramidal (NFV) | Fbxl7         |
| 0 | 1,734479942 | 0,768 | 0,15  | 0 | Pyramidal (NFV) | 9530026P05Rik |
| 0 | 1,730345201 | 0,59  | 0,094 | 0 | Pyramidal (NFV) | Foxp2         |
| 0 | 1,730207564 | 0,766 | 0,227 | 0 | Pyramidal (NFV) | Bicc1         |
| 0 | 1,721367697 | 0,689 | 0,08  | 0 | Pyramidal (NFV) | Sned1         |
| 0 | 1,692941703 | 0,575 | 0,036 | 0 | Pyramidal (NFV) | Colec12       |
| 0 | 1,62486377  | 0,662 | 0,018 | 0 | Pyramidal (NFV) | Eya2          |
| 0 | 1,478102694 | 0,5   | 0,009 | 0 | Pyramidal (NFV) | Lama1         |
| 0 | 1,471588043 | 0,797 | 0,306 | 0 | Pyramidal (NFV) | Rbms3         |
| 0 | 1,469042198 | 0,986 | 0,882 | 0 | Pyramidal (NFV) | Foxp1         |
| 0 | 1,461950738 | 0,851 | 0,415 | 0 | Pyramidal (NFV) | Gpc6          |
| 0 | 1,416997366 | 0,742 | 0,365 | 0 | Pyramidal (NFV) | Ptn           |
| 0 | 1,385508535 | 0,598 | 0,071 | 0 | Pyramidal (NFV) | Arhgap29      |
| 0 | 1,380812933 | 0,768 | 0,195 | 0 | Pyramidal (NFV) | Lama2         |
| 0 | 1,341198212 | 0,6   | 0,05  | 0 | Pyramidal (NFV) | Phldb2        |
| 0 | 1,302512821 | 0,747 | 0,261 | 0 | Pyramidal (NFV) | Rbms1         |
| 0 | 1,290783378 | 0,669 | 0,136 | 0 | Pyramidal (NFV) | Eya1          |
| 0 | 1,279318732 | 0,992 | 0,915 | 0 | Pyramidal (NFV) | Rora          |
| 0 | 1,264156551 | 0,575 | 0,061 | 0 | Pyramidal (NFV) | Gulp1         |
| 0 | 1,259494247 | 0,616 | 0,091 | 0 | Pyramidal (NFV) | Nxn           |
| 0 | 1,251968868 | 0,501 | 0,068 | 0 | Pyramidal (NFV) | Apod          |
| 0 | 1,245076009 | 0,674 | 0,227 | 0 | Pyramidal (NFV) | Slc1a3        |
| 0 | 1,221515685 | 0,929 | 0,516 | 0 | Pyramidal (NFV) | Gm42418       |

|           |             |       |       |           |                 |          |
|-----------|-------------|-------|-------|-----------|-----------------|----------|
| 0         | 1,198576999 | 0,596 | 0,11  | 0         | Pyramidal (NFV) | Ptpn13   |
| 0         | 1,171472748 | 0,681 | 0,165 | 0         | Pyramidal (NFV) | Neat1    |
| 0         | 1,15149671  | 0,568 | 0,172 | 0         | Pyramidal (NFV) | Pbx3     |
| 0         | 1,115292689 | 0,683 | 0,267 | 0         | Pyramidal (NFV) | Tgfr3    |
| 0         | 1,091939262 | 0,679 | 0,259 | 0         | Pyramidal (NFV) | Zfx4     |
| 0         | 1,091738308 | 0,511 | 0,094 | 0         | Pyramidal (NFV) | Arhgap6  |
| 0         | 1,083168525 | 0,591 | 0,117 | 0         | Pyramidal (NFV) | Svil     |
| 0         | 1,071412822 | 0,971 | 0,721 | 0         | Pyramidal (NFV) | Mir100hg |
| 0         | 1,043793762 | 0,602 | 0,103 | 0         | Pyramidal (NFV) | Cpq      |
| 0         | 1,031399005 | 0,523 | 0,023 | 0         | Pyramidal (NFV) | Zic1     |
| 0         | 1,00345921  | 0,68  | 0,225 | 0         | Pyramidal (NFV) | Utrn     |
| 0         | 0,998713535 | 0,732 | 0,322 | 0         | Pyramidal (NFV) | Cmss1    |
| 0         | 0,970841898 | 0,568 | 0,142 | 0         | Pyramidal (NFV) | Rin2     |
| 0         | 0,93034089  | 0,997 | 0,936 | 0         | Pyramidal (NFV) | Mir99ahg |
| 0         | 0,926294901 | 0,543 | 0,115 | 0         | Pyramidal (NFV) | Notch2   |
| 0         | 0,922243667 | 0,606 | 0,211 | 0         | Pyramidal (NFV) | Cald1    |
| 0         | 0,892282794 | 0,587 | 0,161 | 0         | Pyramidal (NFV) | Plpp3    |
| 0         | 0,867041189 | 0,558 | 0,126 | 0         | Pyramidal (NFV) | Tcf7l2   |
| 0         | 0,838385879 | 0,566 | 0,195 | 0         | Pyramidal (NFV) | Tmem164  |
| 0         | 0,795031124 | 0,535 | 0,17  | 0         | Pyramidal (NFV) | Wis      |
| 0         | 0,668609713 | 0,604 | 0,177 | 0         | Pyramidal (NFV) | ApoE     |
| 1,06E-296 | 0,805631109 | 0,573 | 0,199 | 2,87E-292 | Pyramidal (NFV) | Pard3b   |
| 3,97E-294 | 0,679322457 | 0,522 | 0,166 | 1,07E-289 | Pyramidal (NFV) | Epb41l2  |
| 2,56E-292 | 1,104186339 | 0,944 | 0,757 | 6,90E-288 | Pyramidal (NFV) | Slc24a3  |
| 1,33E-275 | 0,978326174 | 0,543 | 0,207 | 3,58E-271 | Pyramidal (NFV) | Hlf      |
| 1,79E-269 | 1,005667049 | 0,562 | 0,232 | 4,83E-265 | Pyramidal (NFV) | Airn     |
| 9,40E-267 | 0,865425873 | 0,976 | 0,725 | 2,53E-262 | Pyramidal (NFV) | Nfia     |
| 5,94E-258 | 0,963710949 | 0,779 | 0,488 | 1,60E-253 | Pyramidal (NFV) | Gmns     |
| 1,80E-247 | 1,010761927 | 0,863 | 0,575 | 4,86E-243 | Pyramidal (NFV) | Msi2     |
| 4,17E-220 | 1,001431229 | 0,825 | 0,576 | 1,12E-215 | Pyramidal (NFV) | Naaladl2 |
| 1,05E-213 | 1,0411146   | 0,7   | 0,421 | 2,83E-209 | Pyramidal (NFV) | Mpp6     |
| 1,32E-210 | 0,782652496 | 0,975 | 0,893 | 3,56E-206 | Pyramidal (NFV) | Ddx5     |
| 2,50E-209 | 0,923772678 | 0,631 | 0,324 | 6,73E-205 | Pyramidal (NFV) | Gab2     |
| 2,99E-209 | 0,780424378 | 0,835 | 0,63  | 8,05E-205 | Pyramidal (NFV) | Nedd4    |
| 4,48E-207 | 2,692538476 | 0,919 | 0,68  | 1,21E-202 | Pyramidal (NFV) | Trpm3    |
| 1,60E-205 | 0,801078329 | 0,685 | 0,375 | 4,32E-201 | Pyramidal (NFV) | Cdk8     |
| 4,70E-197 | 0,884217675 | 0,685 | 0,377 | 1,27E-192 | Pyramidal (NFV) | Dlc1     |
| 5,09E-185 | 0,735406235 | 0,872 | 0,71  | 1,37E-180 | Pyramidal (NFV) | Nfat5    |
| 1,55E-184 | 0,76540421  | 0,547 | 0,253 | 4,16E-180 | Pyramidal (NFV) | Ghr      |
| 9,40E-179 | 0,705238198 | 0,571 | 0,273 | 2,53E-174 | Pyramidal (NFV) | Ttc28    |
| 4,29E-178 | 0,663016169 | 0,934 | 0,782 | 1,16E-173 | Pyramidal (NFV) | Tcf12    |
| 1,93E-177 | 0,788838085 | 0,568 | 0,25  | 5,20E-173 | Pyramidal (NFV) | Pdzrn3   |
| 3,39E-176 | 0,851382145 | 0,796 | 0,626 | 9,12E-172 | Pyramidal (NFV) | Pcca     |

|           |             |       |       |           |                 |         |
|-----------|-------------|-------|-------|-----------|-----------------|---------|
| 1,29E-175 | 0,550351608 | 0,999 | 0,981 | 3,48E-171 | Pyramidal (NFV) | Son     |
| 2,05E-173 | 0,755162448 | 0,686 | 0,42  | 5,52E-169 | Pyramidal (NFV) | Add3    |
| 3,38E-172 | 0,725178262 | 0,874 | 0,679 | 9,11E-168 | Pyramidal (NFV) | Fmnl2   |
| 1,36E-170 | 0,791165835 | 0,579 | 0,289 | 3,67E-166 | Pyramidal (NFV) | Ror1    |
| 5,81E-165 | 0,885810161 | 0,642 | 0,349 | 1,57E-160 | Pyramidal (NFV) | Pde7b   |
| 2,95E-160 | 0,703275102 | 0,653 | 0,383 | 7,94E-156 | Pyramidal (NFV) | Lpp     |
| 2,87E-156 | 0,865546069 | 0,824 | 0,64  | 7,73E-152 | Pyramidal (NFV) | Wwox    |
| 8,43E-153 | 0,642400426 | 0,992 | 0,81  | 2,27E-148 | Pyramidal (NFV) | Zbtb20  |
| 3,02E-152 | 0,782677245 | 0,738 | 0,493 | 8,14E-148 | Pyramidal (NFV) | Pid1    |
| 4,26E-141 | 0,626163129 | 0,743 | 0,501 | 1,15E-136 | Pyramidal (NFV) | Pard3   |
| 4,59E-138 | 0,741704551 | 0,593 | 0,371 | 1,24E-133 | Pyramidal (NFV) | 06. Mrz |
| 6,93E-131 | 0,936556275 | 0,685 | 0,516 | 1,87E-126 | Pyramidal (NFV) | Stk39   |
| 3,96E-130 | 0,642642806 | 0,895 | 0,767 | 1,07E-125 | Pyramidal (NFV) | Diaph2  |
| 2,67E-129 | 0,594115706 | 0,658 | 0,417 | 7,19E-125 | Pyramidal (NFV) | Fchsd2  |
| 2,48E-128 | 0,689709496 | 0,653 | 0,449 | 6,69E-124 | Pyramidal (NFV) | Gnas    |
| 3,01E-127 | 0,870848498 | 0,598 | 0,373 | 8,11E-123 | Pyramidal (NFV) | Tmtc1   |
| 3,16E-122 | 0,933603196 | 0,844 | 0,749 | 8,52E-118 | Pyramidal (NFV) | Prkag2  |
| 9,31E-122 | 0,58603901  | 0,591 | 0,346 | 2,51E-117 | Pyramidal (NFV) | Akap13  |
| 4,88E-118 | 0,739134363 | 0,664 | 0,456 | 1,32E-113 | Pyramidal (NFV) | Ust     |
| 5,55E-118 | 0,535007958 | 0,565 | 0,306 | 1,50E-113 | Pyramidal (NFV) | Stard13 |
| 5,96E-117 | 0,594646931 | 0,805 | 0,598 | 1,61E-112 | Pyramidal (NFV) | Foxn3   |
| 1,01E-113 | 0,662383321 | 0,669 | 0,455 | 2,72E-109 | Pyramidal (NFV) | Sh3d19  |
| 2,13E-106 | 0,503684123 | 0,85  | 0,726 | 5,73E-102 | Pyramidal (NFV) | Ddx17   |
| 1,06E-100 | 0,539462409 | 0,561 | 0,344 | 2,84E-96  | Pyramidal (NFV) | Phkb    |
| 5,79E-96  | 0,508419012 | 0,788 | 0,627 | 1,56E-91  | Pyramidal (NFV) | Wnk1    |
| 1,19E-93  | 0,793649931 | 0,656 | 0,514 | 3,20E-89  | Pyramidal (NFV) | Plxna2  |
| 3,98E-93  | 0,502829637 | 0,789 | 0,643 | 1,07E-88  | Pyramidal (NFV) | Zeb1    |
| 6,02E-91  | 0,641419337 | 0,561 | 0,37  | 1,62E-86  | Pyramidal (NFV) | Fhit    |
| 1,12E-89  | 0,519349797 | 0,77  | 0,645 | 3,02E-85  | Pyramidal (NFV) | Afdn    |
| 6,59E-55  | 0,73453275  | 0,528 | 0,399 | 1,78E-50  | Pyramidal (NFV) | Flrt2   |
| 4,95E-45  | 0,828719861 | 0,501 | 0,408 | 1,33E-40  | Pyramidal (NFV) | Slc23a2 |
| 6,63E-13  | 1,366190007 | 0,756 | 0,811 | 1,79E-08  | Pyramidal (NFV) | Slc4a10 |

|   |             |       |       |   |                   |               |
|---|-------------|-------|-------|---|-------------------|---------------|
| 0 | 2,473123867 | 0,998 | 0,657 | 0 | Pyramidal (CA1-D) | Galntf6       |
| 0 | 1,949675755 | 1     | 0,869 | 0 | Pyramidal (CA1-D) | Cntnap2       |
| 0 | 1,946234305 | 1     | 0,925 | 0 | Pyramidal (CA1-D) | Epha6         |
| 0 | 1,811665772 | 0,685 | 0,124 | 0 | Pyramidal (CA1-D) | 4921539H07Rik |
| 0 | 1,801131286 | 0,995 | 0,815 | 0 | Pyramidal (CA1-D) | Hs6st3        |
| 0 | 1,690497176 | 1     | 0,866 | 0 | Pyramidal (CA1-D) | Cacnb2        |
| 0 | 1,607581311 | 0,999 | 0,852 | 0 | Pyramidal (CA1-D) | Atp2b1        |
| 0 | 1,537174942 | 0,983 | 0,614 | 0 | Pyramidal (CA1-D) | Iqgap2        |
| 0 | 1,502061564 | 0,834 | 0,138 | 0 | Pyramidal (CA1-D) | Gm10754       |
| 0 | 1,4692644   | 0,915 | 0,193 | 0 | Pyramidal (CA1-D) | Gm2164        |

|   |             |       |       |   |                   |               |
|---|-------------|-------|-------|---|-------------------|---------------|
| 0 | 1,468657514 | 0,995 | 0,804 | 0 | Pyramidal (CA1-D) | Ryr3          |
| 0 | 1,459012245 | 0,997 | 0,826 | 0 | Pyramidal (CA1-D) | Tafa1         |
| 0 | 1,447038803 | 0,884 | 0,321 | 0 | Pyramidal (CA1-D) | Man1a         |
| 0 | 1,41456963  | 0,999 | 0,809 | 0 | Pyramidal (CA1-D) | Pex5l         |
| 0 | 1,369736043 | 0,937 | 0,704 | 0 | Pyramidal (CA1-D) | Chrm3         |
| 0 | 1,353442481 | 0,994 | 0,855 | 0 | Pyramidal (CA1-D) | Arl15         |
| 0 | 1,330738966 | 1     | 0,952 | 0 | Pyramidal (CA1-D) | Grin2a        |
| 0 | 1,293386634 | 0,883 | 0,315 | 0 | Pyramidal (CA1-D) | Cntnap5c      |
| 0 | 1,272831546 | 0,996 | 0,891 | 0 | Pyramidal (CA1-D) | Ppm1e         |
| 0 | 1,258067761 | 0,983 | 0,773 | 0 | Pyramidal (CA1-D) | Kcnh7         |
| 0 | 1,251709303 | 0,886 | 0,292 | 0 | Pyramidal (CA1-D) | Nell1         |
| 0 | 1,233367847 | 1     | 0,97  | 0 | Pyramidal (CA1-D) | Kcnd2         |
| 0 | 1,221147413 | 0,999 | 0,917 | 0 | Pyramidal (CA1-D) | Dmd           |
| 0 | 1,201853646 | 1     | 0,928 | 0 | Pyramidal (CA1-D) | Gria1         |
| 0 | 1,200086675 | 0,839 | 0,243 | 0 | Pyramidal (CA1-D) | Ndst3         |
| 0 | 1,157711924 | 0,999 | 0,867 | 0 | Pyramidal (CA1-D) | Slc8a1        |
| 0 | 1,128903404 | 0,946 | 0,749 | 0 | Pyramidal (CA1-D) | Kcnab1        |
| 0 | 1,103002821 | 1     | 0,971 | 0 | Pyramidal (CA1-D) | Grin2b        |
| 0 | 1,094326177 | 0,979 | 0,737 | 0 | Pyramidal (CA1-D) | Prkcb         |
| 0 | 1,091266427 | 0,897 | 0,4   | 0 | Pyramidal (CA1-D) | Runx2         |
| 0 | 1,084398977 | 0,678 | 0,097 | 0 | Pyramidal (CA1-D) | Gm2115        |
| 0 | 1,077946328 | 0,81  | 0,222 | 0 | Pyramidal (CA1-D) | Cpne8         |
| 0 | 1,077290068 | 0,821 | 0,303 | 0 | Pyramidal (CA1-D) | Arhgap12      |
| 0 | 1,070619081 | 0,911 | 0,36  | 0 | Pyramidal (CA1-D) | Cadps2        |
| 0 | 1,068199173 | 0,997 | 0,892 | 0 | Pyramidal (CA1-D) | Cnksr2        |
| 0 | 1,057447774 | 0,975 | 0,762 | 0 | Pyramidal (CA1-D) | Fam189a1      |
| 0 | 1,045181625 | 0,795 | 0,262 | 0 | Pyramidal (CA1-D) | Tbc1d1        |
| 0 | 1,043418783 | 0,993 | 0,885 | 0 | Pyramidal (CA1-D) | Msra          |
| 0 | 1,040617658 | 0,985 | 0,839 | 0 | Pyramidal (CA1-D) | Brd9          |
| 0 | 1,033777855 | 0,975 | 0,64  | 0 | Pyramidal (CA1-D) | Hcn1          |
| 0 | 1,025234329 | 0,987 | 0,819 | 0 | Pyramidal (CA1-D) | St6galnac5    |
| 0 | 1,021997896 | 0,776 | 0,231 | 0 | Pyramidal (CA1-D) | Ror1          |
| 0 | 1,015113972 | 0,868 | 0,333 | 0 | Pyramidal (CA1-D) | 4930419G24Rik |
| 0 | 1,004266959 | 0,967 | 0,733 | 0 | Pyramidal (CA1-D) | Slc24a3       |
| 0 | 0,996464971 | 0,767 | 0,213 | 0 | Pyramidal (CA1-D) | Sema3e        |
| 0 | 0,983511269 | 0,687 | 0,232 | 0 | Pyramidal (CA1-D) | Cpne7         |
| 0 | 0,977433412 | 0,895 | 0,433 | 0 | Pyramidal (CA1-D) | Sorcs3        |
| 0 | 0,966783086 | 0,998 | 0,945 | 0 | Pyramidal (CA1-D) | Hivep2        |
| 0 | 0,959075761 | 0,971 | 0,687 | 0 | Pyramidal (CA1-D) | Khdrbs3       |
| 0 | 0,952032918 | 0,852 | 0,356 | 0 | Pyramidal (CA1-D) | Sh3rf1        |
| 0 | 0,938255165 | 0,984 | 0,818 | 0 | Pyramidal (CA1-D) | 5730522E02Rik |
| 0 | 0,935128871 | 0,866 | 0,372 | 0 | Pyramidal (CA1-D) | Gm49678       |
| 0 | 0,934063762 | 0,97  | 0,715 | 0 | Pyramidal (CA1-D) | Shisa6        |

|   |             |       |       |   |                   |          |
|---|-------------|-------|-------|---|-------------------|----------|
| 0 | 0,926139993 | 0,999 | 0,95  | 0 | Pyramidal (CA1-D) | Ctnbp2   |
| 0 | 0,925364948 | 1     | 0,965 | 0 | Pyramidal (CA1-D) | Ppp3ca   |
| 0 | 0,91869777  | 0,974 | 0,678 | 0 | Pyramidal (CA1-D) | Pde1a    |
| 0 | 0,91752836  | 0,999 | 0,936 | 0 | Pyramidal (CA1-D) | Camk2a   |
| 0 | 0,916088699 | 0,987 | 0,822 | 0 | Pyramidal (CA1-D) | Nr3c2    |
| 0 | 0,914746437 | 1     | 0,977 | 0 | Pyramidal (CA1-D) | Rbfox1   |
| 0 | 0,910204122 | 0,845 | 0,366 | 0 | Pyramidal (CA1-D) | Trpc4    |
| 0 | 0,905768632 | 0,57  | 0,212 | 0 | Pyramidal (CA1-D) | Ndst4    |
| 0 | 0,90390507  | 0,825 | 0,332 | 0 | Pyramidal (CA1-D) | Prkcg    |
| 0 | 0,888673678 | 0,973 | 0,794 | 0 | Pyramidal (CA1-D) | Pigk     |
| 0 | 0,878769201 | 0,984 | 0,827 | 0 | Pyramidal (CA1-D) | Galnt17  |
| 0 | 0,871897481 | 0,821 | 0,357 | 0 | Pyramidal (CA1-D) | Asap2    |
| 0 | 0,868449995 | 0,94  | 0,651 | 0 | Pyramidal (CA1-D) | Kcnn2    |
| 0 | 0,857724851 | 0,643 | 0,191 | 0 | Pyramidal (CA1-D) | Gm30382  |
| 0 | 0,85633224  | 1     | 0,97  | 0 | Pyramidal (CA1-D) | Gm5      |
| 0 | 0,855826367 | 0,999 | 0,895 | 0 | Pyramidal (CA1-D) | Slit3    |
| 0 | 0,847724956 | 0,998 | 0,924 | 0 | Pyramidal (CA1-D) | Raly1    |
| 0 | 0,839599852 | 0,99  | 0,805 | 0 | Pyramidal (CA1-D) | Gm20754  |
| 0 | 0,839567238 | 0,712 | 0,2   | 0 | Pyramidal (CA1-D) | Gm10848  |
| 0 | 0,839209789 | 0,757 | 0,283 | 0 | Pyramidal (CA1-D) | Gm13269  |
| 0 | 0,833820912 | 0,822 | 0,397 | 0 | Pyramidal (CA1-D) | Dgkz     |
| 0 | 0,829612462 | 1     | 0,986 | 0 | Pyramidal (CA1-D) | Adgrb3   |
| 0 | 0,827628349 | 1     | 0,97  | 0 | Pyramidal (CA1-D) | Lrrc7    |
| 0 | 0,825233021 | 1     | 0,958 | 0 | Pyramidal (CA1-D) | Adgrl3   |
| 0 | 0,822978462 | 1     | 0,956 | 0 | Pyramidal (CA1-D) | Kcnip4   |
| 0 | 0,820336315 | 1     | 0,978 | 0 | Pyramidal (CA1-D) | Celf2    |
| 0 | 0,809758015 | 0,976 | 0,891 | 0 | Pyramidal (CA1-D) | Eml6     |
| 0 | 0,804352433 | 0,823 | 0,364 | 0 | Pyramidal (CA1-D) | Itga8    |
| 0 | 0,80216096  | 0,654 | 0,184 | 0 | Pyramidal (CA1-D) | Tmem200a |
| 0 | 0,788244456 | 0,979 | 0,855 | 0 | Pyramidal (CA1-D) | Egfm1    |
| 0 | 0,788077698 | 1     | 0,987 | 0 | Pyramidal (CA1-D) | Dlgap1   |
| 0 | 0,782475854 | 0,96  | 0,752 | 0 | Pyramidal (CA1-D) | Sphkap   |
| 0 | 0,781436073 | 0,935 | 0,68  | 0 | Pyramidal (CA1-D) | Nos1ap   |
| 0 | 0,77683922  | 0,996 | 0,94  | 0 | Pyramidal (CA1-D) | Nrxn3    |
| 0 | 0,775627931 | 0,691 | 0,29  | 0 | Pyramidal (CA1-D) | Lmo3     |
| 0 | 0,768781562 | 0,72  | 0,255 | 0 | Pyramidal (CA1-D) | Rasgrp1  |
| 0 | 0,766178807 | 1     | 0,951 | 0 | Pyramidal (CA1-D) | Dab1     |
| 0 | 0,764037373 | 0,939 | 0,726 | 0 | Pyramidal (CA1-D) | Prkag2   |
| 0 | 0,763833023 | 0,863 | 0,462 | 0 | Pyramidal (CA1-D) | Wipf3    |
| 0 | 0,76303147  | 0,794 | 0,338 | 0 | Pyramidal (CA1-D) | Bcl11b   |
| 0 | 0,762361772 | 0,844 | 0,553 | 0 | Pyramidal (CA1-D) | Zfp804a  |
| 0 | 0,758832086 | 0,963 | 0,805 | 0 | Pyramidal (CA1-D) | Ext1     |
| 0 | 0,754586564 | 0,65  | 0,226 | 0 | Pyramidal (CA1-D) | Hunk     |

|   |             |       |       |   |                   |               |
|---|-------------|-------|-------|---|-------------------|---------------|
| 0 | 0,754537854 | 0,673 | 0,206 | 0 | Pyramidal (CA1-D) | Ccdc88c       |
| 0 | 0,754191082 | 0,979 | 0,907 | 0 | Pyramidal (CA1-D) | 01. Mrz       |
| 0 | 0,742058124 | 1     | 0,987 | 0 | Pyramidal (CA1-D) | Anks1b        |
| 0 | 0,735839751 | 0,996 | 0,955 | 0 | Pyramidal (CA1-D) | Large1        |
| 0 | 0,73411053  | 0,998 | 0,927 | 0 | Pyramidal (CA1-D) | Dock4         |
| 0 | 0,734086664 | 0,665 | 0,257 | 0 | Pyramidal (CA1-D) | Gm44257       |
| 0 | 0,732449846 | 0,715 | 0,275 | 0 | Pyramidal (CA1-D) | Ppp4r4        |
| 0 | 0,728696887 | 0,84  | 0,428 | 0 | Pyramidal (CA1-D) | Runx1t1       |
| 0 | 0,724149248 | 0,987 | 0,895 | 0 | Pyramidal (CA1-D) | Dok6          |
| 0 | 0,720587062 | 0,955 | 0,848 | 0 | Pyramidal (CA1-D) | Ptprg         |
| 0 | 0,719849583 | 1     | 0,983 | 0 | Pyramidal (CA1-D) | Gria2         |
| 0 | 0,715552236 | 0,799 | 0,383 | 0 | Pyramidal (CA1-D) | Homer1        |
| 0 | 0,715245243 | 0,677 | 0,212 | 0 | Pyramidal (CA1-D) | Pkp2          |
| 0 | 0,715169694 | 0,997 | 0,882 | 0 | Pyramidal (CA1-D) | Zeb2          |
| 0 | 0,714527309 | 0,703 | 0,239 | 0 | Pyramidal (CA1-D) | Mpped1        |
| 0 | 0,71449977  | 0,645 | 0,204 | 0 | Pyramidal (CA1-D) | Tspan13       |
| 0 | 0,714424399 | 1     | 0,982 | 0 | Pyramidal (CA1-D) | Opcml         |
| 0 | 0,713347507 | 0,809 | 0,434 | 0 | Pyramidal (CA1-D) | Trpc5         |
| 0 | 0,713223587 | 0,971 | 0,84  | 0 | Pyramidal (CA1-D) | Rasgrf1       |
| 0 | 0,706058795 | 0,631 | 0,215 | 0 | Pyramidal (CA1-D) | Zdhhc2        |
| 0 | 0,701793085 | 0,892 | 0,615 | 0 | Pyramidal (CA1-D) | Adcy9         |
| 0 | 0,701017763 | 0,975 | 0,88  | 0 | Pyramidal (CA1-D) | Pde10a        |
| 0 | 0,700859171 | 0,676 | 0,258 | 0 | Pyramidal (CA1-D) | Chrd          |
| 0 | 0,694878258 | 0,993 | 0,93  | 0 | Pyramidal (CA1-D) | Epha5         |
| 0 | 0,693691007 | 0,814 | 0,425 | 0 | Pyramidal (CA1-D) | Gm44151       |
| 0 | 0,691785469 | 0,766 | 0,35  | 0 | Pyramidal (CA1-D) | Zfp462        |
| 0 | 0,689521731 | 0,998 | 0,949 | 0 | Pyramidal (CA1-D) | Gabrb3        |
| 0 | 0,689359791 | 0,657 | 0,226 | 0 | Pyramidal (CA1-D) | Itпка         |
| 0 | 0,68701803  | 0,631 | 0,197 | 0 | Pyramidal (CA1-D) | Ociad2        |
| 0 | 0,686065049 | 0,732 | 0,346 | 0 | Pyramidal (CA1-D) | A330015K06Rik |
| 0 | 0,685661559 | 0,92  | 0,707 | 0 | Pyramidal (CA1-D) | Itpr1         |
| 0 | 0,685180393 | 1     | 0,972 | 0 | Pyramidal (CA1-D) | Tenm2         |
| 0 | 0,683246251 | 0,981 | 0,832 | 0 | Pyramidal (CA1-D) | Nell2         |
| 0 | 0,670583959 | 1     | 0,896 | 0 | Pyramidal (CA1-D) | Snhg11        |
| 0 | 0,667740839 | 0,608 | 0,199 | 0 | Pyramidal (CA1-D) | Pantr1        |
| 0 | 0,666884484 | 0,973 | 0,876 | 0 | Pyramidal (CA1-D) | Exoc6b        |
| 0 | 0,666695029 | 0,802 | 0,42  | 0 | Pyramidal (CA1-D) | Lmo7          |
| 0 | 0,66577606  | 0,623 | 0,201 | 0 | Pyramidal (CA1-D) | Stum          |
| 0 | 0,664379502 | 0,816 | 0,435 | 0 | Pyramidal (CA1-D) | Sipa113       |
| 0 | 0,662035279 | 0,587 | 0,178 | 0 | Pyramidal (CA1-D) | Matn2         |
| 0 | 0,661811661 | 0,926 | 0,762 | 0 | Pyramidal (CA1-D) | Aff3          |
| 0 | 0,661706312 | 0,657 | 0,253 | 0 | Pyramidal (CA1-D) | Scn3b         |
| 0 | 0,656039677 | 0,849 | 0,535 | 0 | Pyramidal (CA1-D) | Wasf1         |

|   |             |       |       |   |                   |               |
|---|-------------|-------|-------|---|-------------------|---------------|
| 0 | 0,655529704 | 0,639 | 0,222 | 0 | Pyramidal (CA1-D) | Gm37459       |
| 0 | 0,653259473 | 0,956 | 0,792 | 0 | Pyramidal (CA1-D) | Dock9         |
| 0 | 0,648354728 | 1     | 0,967 | 0 | Pyramidal (CA1-D) | Kalm          |
| 0 | 0,647184955 | 0,805 | 0,412 | 0 | Pyramidal (CA1-D) | 4930509J09Rik |
| 0 | 0,646430631 | 1     | 0,969 | 0 | Pyramidal (CA1-D) | Phactr1       |
| 0 | 0,645593266 | 0,655 | 0,259 | 0 | Pyramidal (CA1-D) | Dnah9         |
| 0 | 0,640658725 | 0,968 | 0,849 | 0 | Pyramidal (CA1-D) | Mical2        |
| 0 | 0,640361723 | 0,913 | 0,727 | 0 | Pyramidal (CA1-D) | Epha7         |
| 0 | 0,635838384 | 0,752 | 0,373 | 0 | Pyramidal (CA1-D) | Camkv         |
| 0 | 0,635327407 | 0,76  | 0,41  | 0 | Pyramidal (CA1-D) | Cdc40         |
| 0 | 0,634400744 | 0,614 | 0,206 | 0 | Pyramidal (CA1-D) | Thsd4         |
| 0 | 0,634295927 | 0,951 | 0,832 | 0 | Pyramidal (CA1-D) | Sipa111       |
| 0 | 0,6341431   | 1     | 0,985 | 0 | Pyramidal (CA1-D) | Tcf4          |
| 0 | 0,632953065 | 0,927 | 0,758 | 0 | Pyramidal (CA1-D) | Cdh11         |
| 0 | 0,632299568 | 0,86  | 0,605 | 0 | Pyramidal (CA1-D) | Reps2         |
| 0 | 0,630863084 | 0,601 | 0,206 | 0 | Pyramidal (CA1-D) | Plk2          |
| 0 | 0,629391135 | 1     | 0,976 | 0 | Pyramidal (CA1-D) | Meg3          |
| 0 | 0,628603381 | 0,787 | 0,376 | 0 | Pyramidal (CA1-D) | Rab3c         |
| 0 | 0,626783608 | 0,989 | 0,913 | 0 | Pyramidal (CA1-D) | Gria3         |
| 0 | 0,618282626 | 0,907 | 0,74  | 0 | Pyramidal (CA1-D) | Osblp6        |
| 0 | 0,616781006 | 0,714 | 0,332 | 0 | Pyramidal (CA1-D) | Cacng8        |
| 0 | 0,615184879 | 0,505 | 0,128 | 0 | Pyramidal (CA1-D) | AC163685.1    |
| 0 | 0,613981911 | 1     | 0,978 | 0 | Pyramidal (CA1-D) | Fam155a       |
| 0 | 0,611853501 | 0,994 | 0,946 | 0 | Pyramidal (CA1-D) | Myt11         |
| 0 | 0,610566764 | 0,771 | 0,41  | 0 | Pyramidal (CA1-D) | Sor1          |
| 0 | 0,607193533 | 0,642 | 0,241 | 0 | Pyramidal (CA1-D) | Dkk3          |
| 0 | 0,606199163 | 0,988 | 0,922 | 0 | Pyramidal (CA1-D) | Ptprn2        |
| 0 | 0,605586865 | 0,989 | 0,891 | 0 | Pyramidal (CA1-D) | Cacna1e       |
| 0 | 0,599467046 | 0,775 | 0,441 | 0 | Pyramidal (CA1-D) | Snd1          |
| 0 | 0,599241251 | 0,958 | 0,795 | 0 | Pyramidal (CA1-D) | Tenm4         |
| 0 | 0,596677492 | 0,607 | 0,223 | 0 | Pyramidal (CA1-D) | Gaint9        |
| 0 | 0,595852947 | 0,537 | 0,15  | 0 | Pyramidal (CA1-D) | Neurod6       |
| 0 | 0,595788194 | 0,919 | 0,736 | 0 | Pyramidal (CA1-D) | Dgkg          |
| 0 | 0,594885073 | 0,762 | 0,397 | 0 | Pyramidal (CA1-D) | Susd6         |
| 0 | 0,594817945 | 0,993 | 0,941 | 0 | Pyramidal (CA1-D) | R3hdm1        |
| 0 | 0,592600979 | 0,618 | 0,248 | 0 | Pyramidal (CA1-D) | Adgrl2        |
| 0 | 0,590711131 | 1     | 0,976 | 0 | Pyramidal (CA1-D) | Nav3          |
| 0 | 0,588187101 | 0,633 | 0,26  | 0 | Pyramidal (CA1-D) | Htr1f         |
| 0 | 0,587592834 | 0,673 | 0,257 | 0 | Pyramidal (CA1-D) | Raver2        |
| 0 | 0,583535463 | 0,828 | 0,554 | 0 | Pyramidal (CA1-D) | 2010300C02Rik |
| 0 | 0,583454024 | 0,907 | 0,776 | 0 | Pyramidal (CA1-D) | Khdrbs2       |
| 0 | 0,582467137 | 0,726 | 0,337 | 0 | Pyramidal (CA1-D) | Cpne6         |
| 0 | 0,581142996 | 0,501 | 0,119 | 0 | Pyramidal (CA1-D) | Ptpru         |

|           |             |       |       |           |                   |               |
|-----------|-------------|-------|-------|-----------|-------------------|---------------|
| 0         | 0,576243498 | 0,728 | 0,378 | 0         | Pyramidal (CA1-D) | Ripor2        |
| 0         | 0,575963827 | 0,755 | 0,4   | 0         | Pyramidal (CA1-D) | Shank1        |
| 0         | 0,573421101 | 0,969 | 0,856 | 0         | Pyramidal (CA1-D) | Trim2         |
| 0         | 0,571899225 | 0,908 | 0,72  | 0         | Pyramidal (CA1-D) | Bcl11a        |
| 0         | 0,571464809 | 0,903 | 0,708 | 0         | Pyramidal (CA1-D) | Arhgap39      |
| 0         | 0,571077586 | 0,989 | 0,936 | 0         | Pyramidal (CA1-D) | Mapk10        |
| 0         | 0,567947693 | 0,643 | 0,278 | 0         | Pyramidal (CA1-D) | Samd5         |
| 0         | 0,560947733 | 0,71  | 0,358 | 0         | Pyramidal (CA1-D) | Ksr1          |
| 0         | 0,557569502 | 1     | 0,987 | 0         | Pyramidal (CA1-D) | Dlg2          |
| 0         | 0,557216509 | 1     | 0,96  | 0         | Pyramidal (CA1-D) | Dlgap2        |
| 0         | 0,55660034  | 0,701 | 0,363 | 0         | Pyramidal (CA1-D) | Arpc2         |
| 0         | 0,556277725 | 0,696 | 0,361 | 0         | Pyramidal (CA1-D) | Sptbn2        |
| 0         | 0,553554338 | 0,979 | 0,862 | 0         | Pyramidal (CA1-D) | Cacna2d3      |
| 0         | 0,553123438 | 1     | 0,987 | 0         | Pyramidal (CA1-D) | Lsamp         |
| 0         | 0,552737275 | 0,711 | 0,372 | 0         | Pyramidal (CA1-D) | Kctd1         |
| 0         | 0,552533991 | 0,787 | 0,526 | 0         | Pyramidal (CA1-D) | Ap2b1         |
| 0         | 0,549748788 | 0,892 | 0,741 | 0         | Pyramidal (CA1-D) | Mllt3         |
| 0         | 0,544611251 | 0,975 | 0,934 | 0         | Pyramidal (CA1-D) | Kcnq3         |
| 0         | 0,544443437 | 0,583 | 0,231 | 0         | Pyramidal (CA1-D) | Homer2        |
| 0         | 0,543721047 | 0,864 | 0,659 | 0         | Pyramidal (CA1-D) | Csnk1a1       |
| 0         | 0,543503342 | 0,656 | 0,306 | 0         | Pyramidal (CA1-D) | Wscd2         |
| 0         | 0,540346149 | 0,932 | 0,736 | 0         | Pyramidal (CA1-D) | 9530059O14Rik |
| 0         | 0,539324196 | 0,804 | 0,519 | 0         | Pyramidal (CA1-D) | Cdk17         |
| 0         | 0,537829503 | 0,916 | 0,694 | 0         | Pyramidal (CA1-D) | Epha4         |
| 0         | 0,537774417 | 0,967 | 0,873 | 0         | Pyramidal (CA1-D) | Foxp1         |
| 0         | 0,536492731 | 0,678 | 0,331 | 0         | Pyramidal (CA1-D) | Lrrn2         |
| 0         | 0,536315771 | 0,948 | 0,843 | 0         | Pyramidal (CA1-D) | Acap2         |
| 0         | 0,535890863 | 0,932 | 0,847 | 0         | Pyramidal (CA1-D) | Tspan5        |
| 0         | 0,534507063 | 0,653 | 0,29  | 0         | Pyramidal (CA1-D) | Gm12296       |
| 0         | 0,533992807 | 0,84  | 0,577 | 0         | Pyramidal (CA1-D) | Calm2         |
| 0         | 0,530047517 | 0,93  | 0,77  | 0         | Pyramidal (CA1-D) | Miat          |
| 0         | 0,525300098 | 0,653 | 0,332 | 0         | Pyramidal (CA1-D) | Actr3b        |
| 0         | 0,52493041  | 0,992 | 0,957 | 0         | Pyramidal (CA1-D) | Xkr4          |
| 0         | 0,522325732 | 0,694 | 0,391 | 0         | Pyramidal (CA1-D) | Tfdp2         |
| 0         | 0,516284181 | 0,866 | 0,59  | 0         | Pyramidal (CA1-D) | Pip5k1b       |
| 0         | 0,513983992 | 0,687 | 0,357 | 0         | Pyramidal (CA1-D) | Celf5         |
| 0         | 0,513026796 | 0,767 | 0,431 | 0         | Pyramidal (CA1-D) | Slc17a7       |
| 0         | 0,510704938 | 0,81  | 0,576 | 0         | Pyramidal (CA1-D) | Chl1          |
| 0         | 0,500974392 | 0,659 | 0,32  | 0         | Pyramidal (CA1-D) | Ankrd33b      |
| 0         | 0,500193087 | 0,928 | 0,804 | 0         | Pyramidal (CA1-D) | Adcy2         |
| 5,15E-288 | 0,760595371 | 0,752 | 0,686 | 1,39E-283 | Pyramidal (CA1-D) | Tenm3         |
| 0         | 1,985637788 | 0,978 | 0,709 | 0         | Pyramidal (CA1-V) | Nrg1          |
| 0         | 1,983733719 | 0,946 | 0,582 | 0         | Pyramidal (CA1-V) | Dpp10         |

|   |             |       |       |   |                   |          |
|---|-------------|-------|-------|---|-------------------|----------|
| 0 | 1,815361695 | 0,561 | 0,191 | 0 | Pyramidal (CA1-V) | Tshz2    |
| 0 | 1,669679296 | 0,906 | 0,524 | 0 | Pyramidal (CA1-V) | Sgcz     |
| 0 | 1,411394872 | 0,513 | 0,236 | 0 | Pyramidal (CA1-V) | Il1rapl2 |
| 0 | 1,383967735 | 0,861 | 0,578 | 0 | Pyramidal (CA1-V) | Car10    |
| 0 | 1,383066102 | 0,819 | 0,343 | 0 | Pyramidal (CA1-V) | Unc5d    |
| 0 | 1,349602806 | 1     | 0,948 | 0 | Pyramidal (CA1-V) | Ptprd    |
| 0 | 1,300372276 | 0,681 | 0,176 | 0 | Pyramidal (CA1-V) | Pdzrn3   |
| 0 | 1,262545332 | 0,892 | 0,526 | 0 | Pyramidal (CA1-V) | Pcdh15   |
| 0 | 1,232706294 | 0,989 | 0,893 | 0 | Pyramidal (CA1-V) | Lrrc4c   |
| 0 | 1,219832334 | 0,902 | 0,623 | 0 | Pyramidal (CA1-V) | Mef2c    |
| 0 | 1,208638223 | 0,999 | 0,908 | 0 | Pyramidal (CA1-V) | Arpp21   |
| 0 | 1,203949748 | 0,958 | 0,844 | 0 | Pyramidal (CA1-V) | Lingo2   |
| 0 | 1,19449634  | 0,71  | 0,299 | 0 | Pyramidal (CA1-V) | Rgs6     |
| 0 | 1,168001764 | 0,903 | 0,704 | 0 | Pyramidal (CA1-V) | Cntn5    |
| 0 | 1,166042736 | 0,709 | 0,248 | 0 | Pyramidal (CA1-V) | Prr16    |
| 0 | 1,076206401 | 0,816 | 0,619 | 0 | Pyramidal (CA1-V) | Cntn4    |
| 0 | 1,04033773  | 0,99  | 0,891 | 0 | Pyramidal (CA1-V) | Asic2    |
| 0 | 1,019050806 | 0,77  | 0,258 | 0 | Pyramidal (CA1-V) | Rasgef1b |
| 0 | 0,987849173 | 0,991 | 0,939 | 0 | Pyramidal (CA1-V) | R3hdm1   |
| 0 | 0,987322556 | 0,999 | 0,971 | 0 | Pyramidal (CA1-V) | Tenn2    |
| 0 | 0,967856959 | 0,689 | 0,187 | 0 | Pyramidal (CA1-V) | Satb2    |
| 0 | 0,951494355 | 0,985 | 0,884 | 0 | Pyramidal (CA1-V) | Pcsk2    |
| 0 | 0,945571294 | 0,936 | 0,657 | 0 | Pyramidal (CA1-V) | Gria4    |
| 0 | 0,929048126 | 0,823 | 0,463 | 0 | Pyramidal (CA1-V) | Chsy3    |
| 0 | 0,927730993 | 0,683 | 0,225 | 0 | Pyramidal (CA1-V) | Grm8     |
| 0 | 0,925028668 | 0,784 | 0,315 | 0 | Pyramidal (CA1-V) | Ldb2     |
| 0 | 0,923531864 | 0,59  | 0,192 | 0 | Pyramidal (CA1-V) | Efna5    |
| 0 | 0,895716376 | 0,691 | 0,27  | 0 | Pyramidal (CA1-V) | Nwd2     |
| 0 | 0,879577317 | 0,589 | 0,252 | 0 | Pyramidal (CA1-V) | Tox      |
| 0 | 0,878102775 | 0,569 | 0,176 | 0 | Pyramidal (CA1-V) | Gm15398  |
| 0 | 0,858418816 | 0,675 | 0,187 | 0 | Pyramidal (CA1-V) | Cobl     |
| 0 | 0,849926349 | 0,999 | 0,967 | 0 | Pyramidal (CA1-V) | Phactr1  |
| 0 | 0,84426227  | 0,967 | 0,785 | 0 | Pyramidal (CA1-V) | Tenn4    |
| 0 | 0,839928256 | 0,638 | 0,216 | 0 | Pyramidal (CA1-V) | Tshz3    |
| 0 | 0,837980769 | 0,616 | 0,386 | 0 | Pyramidal (CA1-V) | Gpc6     |
| 0 | 0,831817608 | 0,928 | 0,766 | 0 | Pyramidal (CA1-V) | Khdrbs2  |
| 0 | 0,82205559  | 0,944 | 0,815 | 0 | Pyramidal (CA1-V) | Hs6st3   |
| 0 | 0,815860359 | 0,908 | 0,715 | 0 | Pyramidal (CA1-V) | Etl4     |
| 0 | 0,814779333 | 0,933 | 0,77  | 0 | Pyramidal (CA1-V) | Kcnq5    |
| 0 | 0,811819041 | 0,979 | 0,924 | 0 | Pyramidal (CA1-V) | Raly1    |
| 0 | 0,811392958 | 0,949 | 0,8   | 0 | Pyramidal (CA1-V) | Cacnb4   |
| 0 | 0,810409409 | 0,883 | 0,706 | 0 | Pyramidal (CA1-V) | Cntn3    |
| 0 | 0,808709476 | 0,964 | 0,899 | 0 | Pyramidal (CA1-V) | Kcnb2    |

|   |             |       |       |   |                   |               |
|---|-------------|-------|-------|---|-------------------|---------------|
| 0 | 0,807383228 | 0,591 | 0,164 | 0 | Pyramidal (CA1-V) | Fhod3         |
| 0 | 0,805842926 | 0,71  | 0,251 | 0 | Pyramidal (CA1-V) | Fnbp1l        |
| 0 | 0,793361515 | 0,863 | 0,737 | 0 | Pyramidal (CA1-V) | Cdh12         |
| 0 | 0,778964094 | 0,999 | 0,963 | 0 | Pyramidal (CA1-V) | Kcnma1        |
| 0 | 0,773059709 | 1     | 0,975 | 0 | Pyramidal (CA1-V) | Meg3          |
| 0 | 0,772142719 | 0,743 | 0,412 | 0 | Pyramidal (CA1-V) | Fstl4         |
| 0 | 0,767594625 | 0,614 | 0,274 | 0 | Pyramidal (CA1-V) | Camk2d        |
| 0 | 0,766080736 | 0,695 | 0,317 | 0 | Pyramidal (CA1-V) | Mlip          |
| 0 | 0,764452899 | 1     | 0,962 | 0 | Pyramidal (CA1-V) | Grm7          |
| 0 | 0,756771045 | 0,908 | 0,683 | 0 | Pyramidal (CA1-V) | Hecw1         |
| 0 | 0,754216826 | 1     | 0,891 | 0 | Pyramidal (CA1-V) | Snhg11        |
| 0 | 0,751781161 | 0,94  | 0,749 | 0 | Pyramidal (CA1-V) | Agbl4         |
| 0 | 0,751760491 | 0,857 | 0,532 | 0 | Pyramidal (CA1-V) | A230006K03Rik |
| 0 | 0,750760182 | 0,894 | 0,684 | 0 | Pyramidal (CA1-V) | Asap1         |
| 0 | 0,750333141 | 0,951 | 0,769 | 0 | Pyramidal (CA1-V) | Kcnh7         |
| 0 | 0,73177503  | 0,712 | 0,378 | 0 | Pyramidal (CA1-V) | Homer1        |
| 0 | 0,727344646 | 1     | 0,985 | 0 | Pyramidal (CA1-V) | Csmd1         |
| 0 | 0,720267686 | 0,99  | 0,921 | 0 | Pyramidal (CA1-V) | Fgf12         |
| 0 | 0,709838689 | 0,946 | 0,918 | 0 | Pyramidal (CA1-V) | Kctd16        |
| 0 | 0,705545104 | 0,991 | 0,903 | 0 | Pyramidal (CA1-V) | Snap25        |
| 0 | 0,705204928 | 0,869 | 0,699 | 0 | Pyramidal (CA1-V) | Pcdh7         |
| 0 | 0,698313349 | 0,94  | 0,893 | 0 | Pyramidal (CA1-V) | Sorbs2        |
| 0 | 0,6975107   | 0,537 | 0,172 | 0 | Pyramidal (CA1-V) | Necab1        |
| 0 | 0,686271718 | 0,643 | 0,424 | 0 | Pyramidal (CA1-V) | Brinp3        |
| 0 | 0,682980986 | 1     | 0,977 | 0 | Pyramidal (CA1-V) | Celf2         |
| 0 | 0,675966567 | 0,995 | 0,954 | 0 | Pyramidal (CA1-V) | Kcnp4         |
| 0 | 0,666383116 | 1     | 0,973 | 0 | Pyramidal (CA1-V) | Syt1          |
| 0 | 0,649048975 | 0,546 | 0,277 | 0 | Pyramidal (CA1-V) | Pdzrn4        |
| 0 | 0,632751758 | 0,861 | 0,635 | 0 | Pyramidal (CA1-V) | D430041D05Rik |
| 0 | 0,63172577  | 0,798 | 0,512 | 0 | Pyramidal (CA1-V) | Vsnl1         |
| 0 | 0,629582526 | 0,999 | 0,979 | 0 | Pyramidal (CA1-V) | Fgf14         |
| 0 | 0,62367953  | 0,739 | 0,401 | 0 | Pyramidal (CA1-V) | Camk4         |
| 0 | 0,612128418 | 0,812 | 0,539 | 0 | Pyramidal (CA1-V) | Fut9          |
| 0 | 0,607741321 | 0,641 | 0,296 | 0 | Pyramidal (CA1-V) | Npas2         |
| 0 | 0,604788857 | 0,698 | 0,34  | 0 | Pyramidal (CA1-V) | Nyap2         |
| 0 | 0,603385116 | 0,961 | 0,873 | 0 | Pyramidal (CA1-V) | Rims2         |
| 0 | 0,602686238 | 0,924 | 0,821 | 0 | Pyramidal (CA1-V) | 5730522E02Rik |
| 0 | 0,602369589 | 0,98  | 0,894 | 0 | Pyramidal (CA1-V) | Cacna2d1      |
| 0 | 0,602059066 | 0,664 | 0,452 | 0 | Pyramidal (CA1-V) | Sorcs3        |
| 0 | 0,598829286 | 0,918 | 0,847 | 0 | Pyramidal (CA1-V) | Gpr158        |
| 0 | 0,590720798 | 0,638 | 0,318 | 0 | Pyramidal (CA1-V) | Adcy8         |
| 0 | 0,57801582  | 0,652 | 0,307 | 0 | Pyramidal (CA1-V) | 11. Sep       |
| 0 | 0,574694349 | 0,537 | 0,203 | 0 | Pyramidal (CA1-V) | Satb1         |

|           |             |       |       |           |                   |          |
|-----------|-------------|-------|-------|-----------|-------------------|----------|
| 0         | 0,574617948 | 0,988 | 0,96  | 0         | Pyramidal (CA1-V) | Il1rap1  |
| 0         | 0,571498209 | 0,765 | 0,518 | 0         | Pyramidal (CA1-V) | Lrrtm3   |
| 0         | 0,569731495 | 0,966 | 0,884 | 0         | Pyramidal (CA1-V) | Dock3    |
| 0         | 0,568036187 | 0,728 | 0,36  | 0         | Pyramidal (CA1-V) | Sv2b     |
| 0         | 0,567263246 | 1     | 0,979 | 0         | Pyramidal (CA1-V) | Nrg3     |
| 0         | 0,565765064 | 0,551 | 0,276 | 0         | Pyramidal (CA1-V) | Tmem132d |
| 0         | 0,562267824 | 0,975 | 0,937 | 0         | Pyramidal (CA1-V) | Rgs7     |
| 0         | 0,56172553  | 0,817 | 0,658 | 0         | Pyramidal (CA1-V) | Nlk      |
| 0         | 0,559759294 | 0,913 | 0,717 | 0         | Pyramidal (CA1-V) | Hecw2    |
| 0         | 0,556109272 | 0,975 | 0,834 | 0         | Pyramidal (CA1-V) | Rian     |
| 0         | 0,556098444 | 0,946 | 0,881 | 0         | Pyramidal (CA1-V) | Pde10a   |
| 0         | 0,550489359 | 0,728 | 0,41  | 0         | Pyramidal (CA1-V) | Phf24    |
| 0         | 0,549917192 | 0,999 | 0,975 | 0         | Pyramidal (CA1-V) | Nav3     |
| 0         | 0,541766813 | 0,953 | 0,873 | 0         | Pyramidal (CA1-V) | Samd12   |
| 0         | 0,536840264 | 0,912 | 0,868 | 0         | Pyramidal (CA1-V) | Cacna2d3 |
| 0         | 0,533267615 | 0,551 | 0,333 | 0         | Pyramidal (CA1-V) | Meis2    |
| 0         | 0,529989864 | 0,606 | 0,224 | 0         | Pyramidal (CA1-V) | Cit      |
| 0         | 0,527908724 | 0,909 | 0,807 | 0         | Pyramidal (CA1-V) | Ext1     |
| 0         | 0,522232996 | 0,549 | 0,222 | 0         | Pyramidal (CA1-V) | Igsf9b   |
| 0         | 0,517118702 | 0,572 | 0,275 | 0         | Pyramidal (CA1-V) | Cacng3   |
| 0         | 0,516478812 | 0,796 | 0,596 | 0         | Pyramidal (CA1-V) | Galnt13  |
| 0         | 0,515734723 | 0,632 | 0,308 | 0         | Pyramidal (CA1-V) | Ankrd33b |
| 0         | 0,504019271 | 0,591 | 0,275 | 0         | Pyramidal (CA1-V) | Garnl3   |
| 0         | 0,500120902 | 0,875 | 0,745 | 0         | Pyramidal (CA1-V) | Atp2b2   |
| 4,43E-262 | 0,918311349 | 0,675 | 0,662 | 1,19E-257 | Pyramidal (CA1-V) | Sgcd     |
| 0         | 2,017019125 | 0,952 | 0,423 | 0         | Pyramidal (CA2)   | Ntng1    |
| 0         | 1,581295007 | 0,953 | 0,664 | 0         | Pyramidal (CA2)   | Hcn1     |
| 0         | 1,555879622 | 0,822 | 0,285 | 0         | Pyramidal (CA2)   | Ndst3    |
| 0         | 1,504615188 | 0,9   | 0,266 | 0         | Pyramidal (CA2)   | Grm8     |
| 0         | 1,500359657 | 0,893 | 0,567 | 0         | Pyramidal (CA2)   | Sgcz     |
| 0         | 1,483248245 | 0,822 | 0,366 | 0         | Pyramidal (CA2)   | Ldb2     |
| 0         | 1,478113736 | 0,92  | 0,624 | 0         | Pyramidal (CA2)   | Dpp10    |
| 0         | 1,460577898 | 0,603 | 0,235 | 0         | Pyramidal (CA2)   | Ndst4    |
| 0         | 1,339656103 | 0,779 | 0,405 | 0         | Pyramidal (CA2)   | Cadps2   |
| 0         | 1,320416538 | 0,994 | 0,768 | 0         | Pyramidal (CA2)   | Agbl4    |
| 0         | 1,274460766 | 0,685 | 0,229 | 0         | Pyramidal (CA2)   | Etv1     |
| 0         | 1,269242091 | 0,742 | 0,252 | 0         | Pyramidal (CA2)   | Gm2164   |
| 0         | 1,26740653  | 0,654 | 0,228 | 0         | Pyramidal (CA2)   | Tshz2    |
| 0         | 1,263810105 | 0,688 | 0,23  | 0         | Pyramidal (CA2)   | Fras1    |
| 0         | 1,261664638 | 0,983 | 0,787 | 0         | Pyramidal (CA2)   | Kcnh7    |
| 0         | 1,19974074  | 1     | 0,977 | 0         | Pyramidal (CA2)   | Meg3     |
| 0         | 1,170823513 | 0,699 | 0,284 | 0         | Pyramidal (CA2)   | Tox      |
| 0         | 1,168087475 | 0,568 | 0,077 | 0         | Pyramidal (CA2)   | Rxfp1    |

|   |             |       |       |   |                 |               |
|---|-------------|-------|-------|---|-----------------|---------------|
| 0 | 1,147603478 | 0,717 | 0,445 | 0 | Pyramidal (CA2) | Brinp3        |
| 0 | 1,146010038 | 0,941 | 0,551 | 0 | Pyramidal (CA2) | Sox5          |
| 0 | 1,13878385  | 0,935 | 0,751 | 0 | Pyramidal (CA2) | Cntnap5a      |
| 0 | 1,127109888 | 0,923 | 0,654 | 0 | Pyramidal (CA2) | Astn2         |
| 0 | 1,101609199 | 0,884 | 0,638 | 0 | Pyramidal (CA2) | Cntn4         |
| 0 | 1,052416175 | 0,892 | 0,684 | 0 | Pyramidal (CA2) | Tenn3         |
| 0 | 1,025232728 | 0,994 | 0,879 | 0 | Pyramidal (CA2) | Lrrtm4        |
| 0 | 1,018612519 | 0,658 | 0,221 | 0 | Pyramidal (CA2) | Gm30382       |
| 0 | 1,01164438  | 1     | 0,954 | 0 | Pyramidal (CA2) | Ptprd         |
| 0 | 1,011089088 | 0,994 | 0,959 | 0 | Pyramidal (CA2) | Kcnip4        |
| 0 | 0,99846195  | 0,964 | 0,722 | 0 | Pyramidal (CA2) | Cntn3         |
| 0 | 0,985109226 | 0,963 | 0,824 | 0 | Pyramidal (CA2) | Pex5l         |
| 0 | 0,983603548 | 0,914 | 0,702 | 0 | Pyramidal (CA2) | Pde1a         |
| 0 | 0,935630815 | 1     | 0,903 | 0 | Pyramidal (CA2) | Snhg11        |
| 0 | 0,932915372 | 0,998 | 0,926 | 0 | Pyramidal (CA2) | Ptprn2        |
| 0 | 0,928144582 | 0,998 | 0,929 | 0 | Pyramidal (CA2) | Raly1         |
| 0 | 0,920722324 | 0,999 | 0,972 | 0 | Pyramidal (CA2) | Grm5          |
| 0 | 0,916806215 | 0,965 | 0,829 | 0 | Pyramidal (CA2) | Hs6st3        |
| 0 | 0,907169567 | 0,79  | 0,515 | 0 | Pyramidal (CA2) | Slc35f1       |
| 0 | 0,903036823 | 0,966 | 0,782 | 0 | Pyramidal (CA2) | Khdrbs2       |
| 0 | 0,898743356 | 0,889 | 0,393 | 0 | Pyramidal (CA2) | Sv2b          |
| 0 | 0,897849326 | 0,917 | 0,672 | 0 | Pyramidal (CA2) | Kcnn2         |
| 0 | 0,897690642 | 0,866 | 0,488 | 0 | Pyramidal (CA2) | Ptprt         |
| 0 | 0,894163504 | 0,981 | 0,932 | 0 | Pyramidal (CA2) | Schip1        |
| 0 | 0,886858931 | 0,809 | 0,404 | 0 | Pyramidal (CA2) | Efr3a         |
| 0 | 0,886190278 | 0,992 | 0,869 | 0 | Pyramidal (CA2) | Cacna2d3      |
| 0 | 0,885923436 | 0,849 | 0,401 | 0 | Pyramidal (CA2) | Rab3c         |
| 0 | 0,86567342  | 0,925 | 0,674 | 0 | Pyramidal (CA2) | Thrb          |
| 0 | 0,860432064 | 0,816 | 0,578 | 0 | Pyramidal (CA2) | Cntnap5b      |
| 0 | 0,85363101  | 0,936 | 0,66  | 0 | Pyramidal (CA2) | Caln1         |
| 0 | 0,852585333 | 0,998 | 0,974 | 0 | Pyramidal (CA2) | Tenn2         |
| 0 | 0,847205634 | 0,994 | 0,849 | 0 | Pyramidal (CA2) | Rian          |
| 0 | 0,839729965 | 0,541 | 0,123 | 0 | Pyramidal (CA2) | Rspo2         |
| 0 | 0,834963101 | 0,907 | 0,721 | 0 | Pyramidal (CA2) | Chrm3         |
| 0 | 0,832837895 | 0,949 | 0,63  | 0 | Pyramidal (CA2) | Gabrg3        |
| 0 | 0,832411918 | 0,979 | 0,753 | 0 | Pyramidal (CA2) | Prkcb         |
| 0 | 0,829475878 | 0,629 | 0,192 | 0 | Pyramidal (CA2) | Cntn6         |
| 0 | 0,80403629  | 0,677 | 0,302 | 0 | Pyramidal (CA2) | Samd5         |
| 0 | 0,801396578 | 0,633 | 0,235 | 0 | Pyramidal (CA2) | Efna5         |
| 0 | 0,796381452 | 0,981 | 0,903 | 0 | Pyramidal (CA2) | Asic2         |
| 0 | 0,795950967 | 0,703 | 0,35  | 0 | Pyramidal (CA2) | Sorcs1        |
| 0 | 0,789255526 | 0,77  | 0,375 | 0 | Pyramidal (CA2) | 4930419G24Rik |
| 0 | 0,788171669 | 0,948 | 0,694 | 0 | Pyramidal (CA2) | Rapgef5       |

|   |             |       |       |   |                 |               |
|---|-------------|-------|-------|---|-----------------|---------------|
| 0 | 0,788050238 | 0,682 | 0,27  | 0 | Pyramidal (CA2) | Adgr12        |
| 0 | 0,77883627  | 0,816 | 0,463 | 0 | Pyramidal (CA2) | Rit2          |
| 0 | 0,765627168 | 0,915 | 0,566 | 0 | Pyramidal (CA2) | A230006K03Rik |
| 0 | 0,764989735 | 0,997 | 0,876 | 0 | Pyramidal (CA2) | Slc8a1        |
| 0 | 0,76191349  | 1     | 0,971 | 0 | Pyramidal (CA2) | Phactr1       |
| 0 | 0,756526175 | 0,995 | 0,954 | 0 | Pyramidal (CA2) | Ctnbp2        |
| 0 | 0,749901469 | 0,997 | 0,912 | 0 | Pyramidal (CA2) | Snap25        |
| 0 | 0,739206126 | 0,976 | 0,707 | 0 | Pyramidal (CA2) | Khdrbs3       |
| 0 | 0,733358298 | 0,755 | 0,26  | 0 | Pyramidal (CA2) | Cit           |
| 0 | 0,722856609 | 0,75  | 0,293 | 0 | Pyramidal (CA2) | Serpini1      |
| 0 | 0,721268099 | 0,931 | 0,75  | 0 | Pyramidal (CA2) | Osbp16        |
| 0 | 0,717617539 | 0,701 | 0,406 | 0 | Pyramidal (CA2) | Trpc4         |
| 0 | 0,713137814 | 0,945 | 0,913 | 0 | Pyramidal (CA2) | Oxr1          |
| 0 | 0,712689562 | 0,997 | 0,983 | 0 | Pyramidal (CA2) | Opcml         |
| 0 | 0,712502675 | 0,99  | 0,923 | 0 | Pyramidal (CA2) | Dmd           |
| 0 | 0,710256891 | 0,913 | 0,68  | 0 | Pyramidal (CA2) | Zfp385b       |
| 0 | 0,706974171 | 0,876 | 0,709 | 0 | Pyramidal (CA2) | Asap1         |
| 0 | 0,706212228 | 0,957 | 0,816 | 0 | Pyramidal (CA2) | Cacnb4        |
| 0 | 0,700588191 | 0,589 | 0,222 | 0 | Pyramidal (CA2) | Parm1         |
| 0 | 0,696911412 | 0,705 | 0,278 | 0 | Pyramidal (CA2) | Elavl4        |
| 0 | 0,693423326 | 0,854 | 0,541 | 0 | Pyramidal (CA2) | Vsnl1         |
| 0 | 0,692387571 | 0,98  | 0,805 | 0 | Pyramidal (CA2) | Tenm4         |
| 0 | 0,690584495 | 0,72  | 0,34  | 0 | Pyramidal (CA2) | Ankrd33b      |
| 0 | 0,686746479 | 0,562 | 0,141 | 0 | Pyramidal (CA2) | Adgra1        |
| 0 | 0,686575394 | 0,996 | 0,919 | 0 | Pyramidal (CA2) | Arpp21        |
| 0 | 0,686492774 | 0,645 | 0,217 | 0 | Pyramidal (CA2) | Tmem200a      |
| 0 | 0,680169674 | 0,725 | 0,376 | 0 | Pyramidal (CA2) | Ptpr          |
| 0 | 0,678218434 | 0,815 | 0,504 | 0 | Pyramidal (CA2) | Chsy3         |
| 0 | 0,674013258 | 0,56  | 0,168 | 0 | Pyramidal (CA2) | 4933413L06Rik |
| 0 | 0,661004564 | 0,992 | 0,945 | 0 | Pyramidal (CA2) | R3hdm1        |
| 0 | 0,659494924 | 0,616 | 0,266 | 0 | Pyramidal (CA2) | Cpne7         |
| 0 | 0,659409605 | 0,748 | 0,338 | 0 | Pyramidal (CA2) | Pcnx2         |
| 0 | 0,657981091 | 0,707 | 0,271 | 0 | Pyramidal (CA2) | Mpped1        |
| 0 | 0,656796548 | 0,683 | 0,3   | 0 | Pyramidal (CA2) | Tmem132d      |
| 0 | 0,656347109 | 0,896 | 0,737 | 0 | Pyramidal (CA2) | Galnt18       |
| 0 | 0,656087364 | 0,99  | 0,855 | 0 | Pyramidal (CA2) | Lingo2        |
| 0 | 0,654683972 | 0,996 | 0,952 | 0 | Pyramidal (CA2) | Lrfn5         |
| 0 | 0,651633706 | 0,74  | 0,379 | 0 | Pyramidal (CA2) | Nyap2         |
| 0 | 0,648576491 | 0,975 | 0,887 | 0 | Pyramidal (CA2) | Pde10a        |
| 0 | 0,646986434 | 0,837 | 0,703 | 0 | Pyramidal (CA2) | Nos1ap        |
| 0 | 0,636872932 | 0,835 | 0,542 | 0 | Pyramidal (CA2) | Lrrtm3        |
| 0 | 0,63491601  | 0,977 | 0,909 | 0 | Pyramidal (CA2) | Stxbp5l       |
| 0 | 0,63226475  | 0,755 | 0,373 | 0 | Pyramidal (CA2) | Esrrg         |

|   |             |       |       |   |                 |               |
|---|-------------|-------|-------|---|-----------------|---------------|
| 0 | 0,63171214  | 0,955 | 0,778 | 0 | Pyramidal (CA2) | Fam189a1      |
| 0 | 0,631218927 | 0,584 | 0,267 | 0 | Pyramidal (CA2) | Man2a1        |
| 0 | 0,631062939 | 0,556 | 0,203 | 0 | Pyramidal (CA2) | Etv5          |
| 0 | 0,625120668 | 0,977 | 0,935 | 0 | Pyramidal (CA2) | Epha5         |
| 0 | 0,624240559 | 0,588 | 0,284 | 0 | Pyramidal (CA2) | Pcsk5         |
| 0 | 0,623254389 | 0,658 | 0,353 | 0 | Pyramidal (CA2) | Adcy8         |
| 0 | 0,621862637 | 0,996 | 0,965 | 0 | Pyramidal (CA2) | Ube3a         |
| 0 | 0,610385265 | 0,986 | 0,786 | 0 | Pyramidal (CA2) | Kcnq5         |
| 0 | 0,605371169 | 0,614 | 0,249 | 0 | Pyramidal (CA2) | Gaint9        |
| 0 | 0,604654584 | 0,906 | 0,67  | 0 | Pyramidal (CA2) | Arhgap26      |
| 0 | 0,602945092 | 0,763 | 0,377 | 0 | Pyramidal (CA2) | B830012L14Rik |
| 0 | 0,602748567 | 1     | 0,98  | 0 | Pyramidal (CA2) | Celf2         |
| 0 | 0,599831293 | 0,504 | 0,112 | 0 | Pyramidal (CA2) | Chst8         |
| 0 | 0,586441592 | 0,751 | 0,37  | 0 | Pyramidal (CA2) | Prkcg         |
| 0 | 0,585427644 | 0,977 | 0,906 | 0 | Pyramidal (CA2) | Kcnb2         |
| 0 | 0,584151719 | 0,675 | 0,342 | 0 | Pyramidal (CA2) | Crim1         |
| 0 | 0,582713307 | 0,78  | 0,437 | 0 | Pyramidal (CA2) | Camk4         |
| 0 | 0,582507732 | 0,625 | 0,306 | 0 | Pyramidal (CA2) | Cacng3        |
| 0 | 0,581039673 | 0,996 | 0,949 | 0 | Pyramidal (CA2) | Hivep2        |
| 0 | 0,580140596 | 0,511 | 0,161 | 0 | Pyramidal (CA2) | Pbx3          |
| 0 | 0,575790875 | 0,553 | 0,291 | 0 | Pyramidal (CA2) | Dnah9         |
| 0 | 0,571861556 | 0,955 | 0,78  | 0 | Pyramidal (CA2) | Miat          |
| 0 | 0,571579128 | 0,713 | 0,368 | 0 | Pyramidal (CA2) | Man1a         |
| 0 | 0,570561689 | 0,774 | 0,412 | 0 | Pyramidal (CA2) | Plcl2         |
| 0 | 0,568072923 | 0,891 | 0,773 | 0 | Pyramidal (CA2) | Grid2         |
| 0 | 0,567546243 | 0,584 | 0,252 | 0 | Pyramidal (CA2) | Rbms1         |
| 0 | 0,566115802 | 0,948 | 0,921 | 0 | Pyramidal (CA2) | Gria3         |
| 0 | 0,565523076 | 0,643 | 0,254 | 0 | Pyramidal (CA2) | Igsf9b        |
| 0 | 0,55985888  | 0,876 | 0,585 | 0 | Pyramidal (CA2) | Xylt1         |
| 0 | 0,559807954 | 0,654 | 0,308 | 0 | Pyramidal (CA2) | Garnl3        |
| 0 | 0,551886349 | 0,647 | 0,288 | 0 | Pyramidal (CA2) | Chrd          |
| 0 | 0,551120846 | 0,869 | 0,819 | 0 | Pyramidal (CA2) | Cdh8          |
| 0 | 0,547938505 | 0,606 | 0,252 | 0 | Pyramidal (CA2) | Gm37459       |
| 0 | 0,540880355 | 0,836 | 0,616 | 0 | Pyramidal (CA2) | Gaint13       |
| 0 | 0,540321599 | 0,758 | 0,436 | 0 | Pyramidal (CA2) | Sorl1         |
| 0 | 0,539562736 | 0,994 | 0,94  | 0 | Pyramidal (CA2) | Snhg14        |
| 0 | 0,53523042  | 0,543 | 0,165 | 0 | Pyramidal (CA2) | Plekha7       |
| 0 | 0,525201714 | 0,714 | 0,355 | 0 | Pyramidal (CA2) | Mirg          |
| 0 | 0,523845397 | 0,54  | 0,304 | 0 | Pyramidal (CA2) | A330008L17Rik |
| 0 | 0,52234069  | 1     | 0,982 | 0 | Pyramidal (CA2) | Nrg3          |
| 0 | 0,516480388 | 0,733 | 0,409 | 0 | Pyramidal (CA2) | Arid5b        |
| 0 | 0,513695634 | 1     | 0,988 | 0 | Pyramidal (CA2) | Anks1b        |
| 0 | 0,512205119 | 0,621 | 0,316 | 0 | Pyramidal (CA2) | Sorcs2        |

|           |             |       |       |           |                 |       |
|-----------|-------------|-------|-------|-----------|-----------------|-------|
| 0         | 0,510985901 | 0,629 | 0,307 | 0         | Pyramidal (CA2) | Fnbp1 |
| 0         | 0,510905779 | 0,526 | 0,191 | 0         | Pyramidal (CA2) | Gap43 |
| 0         | 0,508364301 | 0,745 | 0,399 | 0         | Pyramidal (CA2) | Peg3  |
| 1,91E-303 | 0,67562102  | 0,513 | 0,291 | 5,15E-299 | Pyramidal (CA2) | Htr1f |
| 2,05E-266 | 0,507760563 | 0,935 | 0,915 | 5,52E-262 | Pyramidal (CA2) | Cadm1 |
| 1,99E-226 | 0,578108079 | 0,821 | 0,731 | 5,35E-222 | Pyramidal (CA2) | Cntn5 |
| 5,87E-191 | 0,678022845 | 0,797 | 0,816 | 1,58E-186 | Pyramidal (CA2) | Robo1 |
| 1,66E-172 | 0,641870871 | 0,795 | 0,696 | 4,48E-168 | Pyramidal (CA2) | Gria4 |
| 3,15E-118 | 0,64658309  | 0,778 | 0,75  | 8,49E-114 | Pyramidal (CA2) | Nrg1  |

|   |             |       |       |   |                 |               |
|---|-------------|-------|-------|---|-----------------|---------------|
| 0 | 2,428899419 | 0,757 | 0,119 | 0 | Pyramidal (CA3) | Gm32647       |
| 0 | 2,218682164 | 0,984 | 0,521 | 0 | Pyramidal (CA3) | Hs3st4        |
| 0 | 2,208578291 | 0,998 | 0,617 | 0 | Pyramidal (CA3) | Mgat4c        |
| 0 | 2,144766068 | 0,977 | 0,45  | 0 | Pyramidal (CA3) | Grik4         |
| 0 | 1,904977186 | 0,971 | 0,779 | 0 | Pyramidal (CA3) | Kcnq5         |
| 0 | 1,86514711  | 0,957 | 0,366 | 0 | Pyramidal (CA3) | Trhde         |
| 0 | 1,858629894 | 0,887 | 0,466 | 0 | Pyramidal (CA3) | Trps1         |
| 0 | 1,806901804 | 0,978 | 0,368 | 0 | Pyramidal (CA3) | Cpne4         |
| 0 | 1,590012988 | 0,948 | 0,836 | 0 | Pyramidal (CA3) | Tafa1         |
| 0 | 1,576283557 | 0,897 | 0,179 | 0 | Pyramidal (CA3) | Ccbe1         |
| 0 | 1,541100645 | 0,977 | 0,452 | 0 | Pyramidal (CA3) | Spock1        |
| 0 | 1,462196661 | 0,884 | 0,332 | 0 | Pyramidal (CA3) | Cntnap5c      |
| 0 | 1,429231031 | 1     | 0,928 | 0 | Pyramidal (CA3) | Schip1        |
| 0 | 1,416425935 | 1     | 0,909 | 0 | Pyramidal (CA3) | Pde4d         |
| 0 | 1,408181972 | 0,997 | 0,946 | 0 | Pyramidal (CA3) | Frmpp4        |
| 0 | 1,370032839 | 0,816 | 0,281 | 0 | Pyramidal (CA3) | Slit2         |
| 0 | 1,357960448 | 0,917 | 0,382 | 0 | Pyramidal (CA3) | Gm49678       |
| 0 | 1,337316603 | 0,995 | 0,86  | 0 | Pyramidal (CA3) | Prkca         |
| 0 | 1,330694993 | 0,791 | 0,141 | 0 | Pyramidal (CA3) | Nectin3       |
| 0 | 1,313315225 | 0,996 | 0,694 | 0 | Pyramidal (CA3) | Khdrbs3       |
| 0 | 1,302999052 | 0,988 | 0,721 | 0 | Pyramidal (CA3) | Shisa6        |
| 0 | 1,265721094 | 0,999 | 0,927 | 0 | Pyramidal (CA3) | Epha6         |
| 0 | 1,258400798 | 0,998 | 0,941 | 0 | Pyramidal (CA3) | Cacna1a       |
| 0 | 1,244630352 | 0,841 | 0,254 | 0 | Pyramidal (CA3) | Raver2        |
| 0 | 1,230567583 | 1     | 0,941 | 0 | Pyramidal (CA3) | Nrxn3         |
| 0 | 1,220658787 | 0,99  | 0,832 | 0 | Pyramidal (CA3) | Camk1d        |
| 0 | 1,219699734 | 0,996 | 0,893 | 0 | Pyramidal (CA3) | Clstn2        |
| 0 | 1,202419755 | 0,978 | 0,694 | 0 | Pyramidal (CA3) | Nkain3        |
| 0 | 1,193137667 | 0,985 | 0,737 | 0 | Pyramidal (CA3) | 9530059O14Rik |
| 0 | 1,191650226 | 1     | 0,954 | 0 | Pyramidal (CA3) | Cadps         |
| 0 | 1,190586012 | 0,999 | 0,929 | 0 | Pyramidal (CA3) | Dock4         |
| 0 | 1,183362319 | 0,879 | 0,506 | 0 | Pyramidal (CA3) | Neto1         |
| 0 | 1,147172246 | 0,992 | 0,832 | 0 | Pyramidal (CA3) | Unc5c         |

|   |             |       |       |   |                 |               |
|---|-------------|-------|-------|---|-----------------|---------------|
| 0 | 1,116518008 | 0,701 | 0,244 | 0 | Pyramidal (CA3) | Cpne7         |
| 0 | 1,101235706 | 0,991 | 0,887 | 0 | Pyramidal (CA3) | Dcc           |
| 0 | 1,072262639 | 0,961 | 0,935 | 0 | Pyramidal (CA3) | Epha5         |
| 0 | 1,065433384 | 0,788 | 0,44  | 0 | Pyramidal (CA3) | Epha3         |
| 0 | 1,062314552 | 0,795 | 0,19  | 0 | Pyramidal (CA3) | Rnf182        |
| 0 | 1,062173265 | 0,802 | 0,192 | 0 | Pyramidal (CA3) | Fstl5         |
| 0 | 1,04084277  | 0,997 | 0,81  | 0 | Pyramidal (CA3) | Ryr3          |
| 0 | 1,031615815 | 0,916 | 0,411 | 0 | Pyramidal (CA3) | Thsd7b        |
| 0 | 1,029769159 | 0,979 | 0,689 | 0 | Pyramidal (CA3) | Ak5           |
| 0 | 1,007365626 | 0,905 | 0,371 | 0 | Pyramidal (CA3) | Sv2b          |
| 0 | 1,000923459 | 0,999 | 0,906 | 0 | Pyramidal (CA3) | Cacna1c       |
| 0 | 0,982896257 | 0,795 | 0,301 | 0 | Pyramidal (CA3) | Peak1         |
| 0 | 0,979822343 | 0,944 | 0,628 | 0 | Pyramidal (CA3) | Nrp1          |
| 0 | 0,975863066 | 0,852 | 0,25  | 0 | Pyramidal (CA3) | Elavl2        |
| 0 | 0,97160338  | 0,806 | 0,307 | 0 | Pyramidal (CA3) | Akap13        |
| 0 | 0,969219696 | 0,72  | 0,197 | 0 | Pyramidal (CA3) | Cachd1        |
| 0 | 0,962553904 | 0,645 | 0,115 | 0 | Pyramidal (CA3) | Rerg          |
| 0 | 0,956597488 | 0,996 | 0,983 | 0 | Pyramidal (CA3) | Opcml         |
| 0 | 0,953863456 | 0,997 | 0,905 | 0 | Pyramidal (CA3) | Prkg1         |
| 0 | 0,94524484  | 0,974 | 0,707 | 0 | Pyramidal (CA3) | Chrm3         |
| 0 | 0,940014972 | 0,793 | 0,39  | 0 | Pyramidal (CA3) | Cdh9          |
| 0 | 0,937186778 | 0,797 | 0,287 | 0 | Pyramidal (CA3) | Gm12296       |
| 0 | 0,930478316 | 0,788 | 0,322 | 0 | Pyramidal (CA3) | Brinp2        |
| 0 | 0,922566449 | 0,719 | 0,206 | 0 | Pyramidal (CA3) | Dpf3          |
| 0 | 0,922250113 | 0,999 | 0,978 | 0 | Pyramidal (CA3) | Rbfox1        |
| 0 | 0,918525126 | 0,911 | 0,51  | 0 | Pyramidal (CA3) | Rnf112        |
| 0 | 0,909015599 | 0,989 | 0,864 | 0 | Pyramidal (CA3) | Cacna2d3      |
| 0 | 0,905816668 | 0,996 | 0,83  | 0 | Pyramidal (CA3) | Galnt17       |
| 0 | 0,900132662 | 0,991 | 0,891 | 0 | Pyramidal (CA3) | Pcsk2         |
| 0 | 0,888451594 | 0,851 | 0,394 | 0 | Pyramidal (CA3) | Kcnc2         |
| 0 | 0,885930721 | 0,763 | 0,218 | 0 | Pyramidal (CA3) | Pkp2          |
| 0 | 0,876791777 | 0,794 | 0,294 | 0 | Pyramidal (CA3) | Efr3b         |
| 0 | 0,872717853 | 0,709 | 0,21  | 0 | Pyramidal (CA3) | Thsd4         |
| 0 | 0,871102739 | 0,898 | 0,521 | 0 | Pyramidal (CA3) | Luzp2         |
| 0 | 0,870508103 | 0,994 | 0,904 | 0 | Pyramidal (CA3) | Cdk14         |
| 0 | 0,868645241 | 0,937 | 0,621 | 0 | Pyramidal (CA3) | Focad         |
| 0 | 0,865719067 | 0,985 | 0,898 | 0 | Pyramidal (CA3) | Dok6          |
| 0 | 0,862911565 | 0,996 | 0,879 | 0 | Pyramidal (CA3) | Celf4         |
| 0 | 0,859121678 | 0,973 | 0,906 | 0 | Pyramidal (CA3) | Stxbp5l       |
| 0 | 0,849055519 | 0,841 | 0,4   | 0 | Pyramidal (CA3) | Susd6         |
| 0 | 0,845338038 | 0,64  | 0,113 | 0 | Pyramidal (CA3) | 9530026P05Rik |
| 0 | 0,842439107 | 1     | 0,964 | 0 | Pyramidal (CA3) | Rims1         |
| 0 | 0,841946035 | 0,964 | 0,696 | 0 | Pyramidal (CA3) | Epha4         |

|   |             |       |       |   |                 |               |
|---|-------------|-------|-------|---|-----------------|---------------|
| 0 | 0,840504701 | 0,724 | 0,234 | 0 | Pyramidal (CA3) | Sema3e        |
| 0 | 0,830989186 | 0,752 | 0,296 | 0 | Pyramidal (CA3) | Nwd2          |
| 0 | 0,830695985 | 0,925 | 0,681 | 0 | Pyramidal (CA3) | Sh3gl2        |
| 0 | 0,824869162 | 1     | 0,795 | 0 | Pyramidal (CA3) | Zbtb20        |
| 0 | 0,82009738  | 0,629 | 0,227 | 0 | Pyramidal (CA3) | 6530403H02Rik |
| 0 | 0,807749351 | 0,993 | 0,874 | 0 | Pyramidal (CA3) | Cntnap2       |
| 0 | 0,786543055 | 0,974 | 0,905 | 0 | Pyramidal (CA3) | Brinp1        |
| 0 | 0,775062081 | 0,972 | 0,827 | 0 | Pyramidal (CA3) | Rapgef2       |
| 0 | 0,774316069 | 0,969 | 0,857 | 0 | Pyramidal (CA3) | Dgkb          |
| 0 | 0,773527579 | 1     | 0,93  | 0 | Pyramidal (CA3) | Gria1         |
| 0 | 0,769190538 | 0,792 | 0,343 | 0 | Pyramidal (CA3) | Cpne6         |
| 0 | 0,765205633 | 0,987 | 0,827 | 0 | Pyramidal (CA3) | Nr3c2         |
| 0 | 0,7472869   | 0,949 | 0,667 | 0 | Pyramidal (CA3) | Zfp385b       |
| 0 | 0,745254774 | 0,74  | 0,572 | 0 | Pyramidal (CA3) | Zfp804a       |
| 0 | 0,734459093 | 0,98  | 0,852 | 0 | Pyramidal (CA3) | Gm26871       |
| 0 | 0,732709054 | 1     | 0,967 | 0 | Pyramidal (CA3) | Erc2          |
| 0 | 0,732223893 | 0,862 | 0,51  | 0 | Pyramidal (CA3) | Tanc1         |
| 0 | 0,727577369 | 0,688 | 0,235 | 0 | Pyramidal (CA3) | 4921534H16Rik |
| 0 | 0,725644223 | 0,66  | 0,225 | 0 | Pyramidal (CA3) | Ccnd2         |
| 0 | 0,725288535 | 0,815 | 0,373 | 0 | Pyramidal (CA3) | Arhgef25      |
| 0 | 0,722542129 | 1     | 0,985 | 0 | Pyramidal (CA3) | Nlgn1         |
| 0 | 0,72237539  | 0,898 | 0,489 | 0 | Pyramidal (CA3) | Slit1         |
| 0 | 0,72090104  | 0,925 | 0,734 | 0 | Pyramidal (CA3) | Ano3          |
| 0 | 0,718298982 | 0,965 | 0,788 | 0 | Pyramidal (CA3) | Klhl29        |
| 0 | 0,710863892 | 0,864 | 0,432 | 0 | Pyramidal (CA3) | Slc17a7       |
| 0 | 0,709580267 | 0,715 | 0,286 | 0 | Pyramidal (CA3) | Gpi1          |
| 0 | 0,701541581 | 0,991 | 0,836 | 0 | Pyramidal (CA3) | Nell2         |
| 0 | 0,698651754 | 0,714 | 0,303 | 0 | Pyramidal (CA3) | Sgk1          |
| 0 | 0,694418921 | 0,756 | 0,329 | 0 | Pyramidal (CA3) | Stim2         |
| 0 | 0,691540046 | 0,904 | 0,743 | 0 | Pyramidal (CA3) | Dgkg          |
| 0 | 0,689123034 | 0,654 | 0,227 | 0 | Pyramidal (CA3) | Adam11        |
| 0 | 0,6883862   | 0,758 | 0,334 | 0 | Pyramidal (CA3) | Lrrn2         |
| 0 | 0,688083892 | 0,999 | 0,977 | 0 | Pyramidal (CA3) | Nav3          |
| 0 | 0,685615594 | 0,994 | 0,917 | 0 | Pyramidal (CA3) | Enox1         |
| 0 | 0,680635893 | 0,807 | 0,42  | 0 | Pyramidal (CA3) | Camk4         |
| 0 | 0,680633471 | 0,964 | 0,754 | 0 | Pyramidal (CA3) | Mctp1         |
| 0 | 0,680079708 | 0,984 | 0,871 | 0 | Pyramidal (CA3) | Cacnb2        |
| 0 | 0,677628115 | 0,659 | 0,331 | 0 | Pyramidal (CA3) | Asph          |
| 0 | 0,671091067 | 0,758 | 0,411 | 0 | Pyramidal (CA3) | Parp8         |
| 0 | 0,660971293 | 0,993 | 0,896 | 0 | Pyramidal (CA3) | Cnksr2        |
| 0 | 0,660753863 | 1     | 0,981 | 0 | Pyramidal (CA3) | Nrg3          |
| 0 | 0,658900969 | 0,786 | 0,351 | 0 | Pyramidal (CA3) | Prkcg         |
| 0 | 0,657747457 | 0,605 | 0,163 | 0 | Pyramidal (CA3) | Arhgef26      |

|   |             |       |       |   |                 |               |
|---|-------------|-------|-------|---|-----------------|---------------|
| 0 | 0,65558596  | 0,82  | 0,468 | 0 | Pyramidal (CA3) | Dpyd          |
| 0 | 0,652890404 | 0,682 | 0,254 | 0 | Pyramidal (CA3) | Col4a2        |
| 0 | 0,650676993 | 0,959 | 0,855 | 0 | Pyramidal (CA3) | Syn2          |
| 0 | 0,650007533 | 0,81  | 0,522 | 0 | Pyramidal (CA3) | Gm36975       |
| 0 | 0,64930511  | 0,843 | 0,444 | 0 | Pyramidal (CA3) | Sipa113       |
| 0 | 0,646894291 | 0,603 | 0,156 | 0 | Pyramidal (CA3) | Neurod6       |
| 0 | 0,645417638 | 0,836 | 0,468 | 0 | Pyramidal (CA3) | Nin           |
| 0 | 0,64309957  | 0,685 | 0,272 | 0 | Pyramidal (CA3) | Rasgrp1       |
| 0 | 0,639682412 | 0,726 | 0,313 | 0 | Pyramidal (CA3) | Traf3         |
| 0 | 0,63906802  | 1     | 0,975 | 0 | Pyramidal (CA3) | Syt1          |
| 0 | 0,633864665 | 0,626 | 0,206 | 0 | Pyramidal (CA3) | 2900026A02Rik |
| 0 | 0,632946755 | 0,998 | 0,947 | 0 | Pyramidal (CA3) | Ryr2          |
| 0 | 0,632315    | 0,998 | 0,969 | 0 | Pyramidal (CA3) | Ccser1        |
| 0 | 0,630896529 | 0,531 | 0,139 | 0 | Pyramidal (CA3) | Smoc2         |
| 0 | 0,630817966 | 0,522 | 0,108 | 0 | Pyramidal (CA3) | Nrip3         |
| 0 | 0,630148292 | 0,989 | 0,889 | 0 | Pyramidal (CA3) | Msra          |
| 0 | 0,629060634 | 0,982 | 0,799 | 0 | Pyramidal (CA3) | Robo1         |
| 0 | 0,624183043 | 0,709 | 0,311 | 0 | Pyramidal (CA3) | Wscd2         |
| 0 | 0,623667772 | 0,628 | 0,239 | 0 | Pyramidal (CA3) | Gm10649       |
| 0 | 0,623539349 | 0,676 | 0,273 | 0 | Pyramidal (CA3) | lqsec3        |
| 0 | 0,620429671 | 0,852 | 0,562 | 0 | Pyramidal (CA3) | Mpped2        |
| 0 | 0,619656387 | 0,538 | 0,156 | 0 | Pyramidal (CA3) | Clmp          |
| 0 | 0,616910964 | 0,574 | 0,334 | 0 | Pyramidal (CA3) | Tead1         |
| 0 | 0,616611957 | 0,954 | 0,689 | 0 | Pyramidal (CA3) | Pde1a         |
| 0 | 0,615664524 | 1     | 0,961 | 0 | Pyramidal (CA3) | Dlgap2        |
| 0 | 0,615035687 | 0,878 | 0,511 | 0 | Pyramidal (CA3) | Ptk2b         |
| 0 | 0,61327467  | 0,504 | 0,096 | 0 | Pyramidal (CA3) | Galnt3        |
| 0 | 0,611118542 | 0,516 | 0,111 | 0 | Pyramidal (CA3) | 2310002F09Rik |
| 0 | 0,610382762 | 0,654 | 0,255 | 0 | Pyramidal (CA3) | Stmn2         |
| 0 | 0,607950381 | 0,958 | 0,828 | 0 | Pyramidal (CA3) | Aak1          |
| 0 | 0,607188333 | 0,946 | 0,782 | 0 | Pyramidal (CA3) | Aopep         |
| 0 | 0,60241073  | 0,595 | 0,23  | 0 | Pyramidal (CA3) | 4921511C10Rik |
| 0 | 0,60108078  | 0,942 | 0,688 | 0 | Pyramidal (CA3) | Tmem108       |
| 0 | 0,600103415 | 0,966 | 0,859 | 0 | Pyramidal (CA3) | Gm20642       |
| 0 | 0,598643933 | 0,925 | 0,701 | 0 | Pyramidal (CA3) | Grm1          |
| 0 | 0,593358586 | 0,967 | 0,829 | 0 | Pyramidal (CA3) | Dync1i1       |
| 0 | 0,591910864 | 0,85  | 0,607 | 0 | Pyramidal (CA3) | Rtl4          |
| 0 | 0,589427179 | 0,808 | 0,479 | 0 | Pyramidal (CA3) | Wipf3         |
| 0 | 0,589289923 | 0,968 | 0,796 | 0 | Pyramidal (CA3) | Dock9         |
| 0 | 0,589125514 | 0,949 | 0,851 | 0 | Pyramidal (CA3) | Ptprg         |
| 0 | 0,58709048  | 0,94  | 0,762 | 0 | Pyramidal (CA3) | Cdh11         |
| 0 | 0,585873469 | 0,591 | 0,2   | 0 | Pyramidal (CA3) | Gm16183       |
| 0 | 0,582699862 | 0,931 | 0,727 | 0 | Pyramidal (CA3) | Galnt18       |

|   |             |       |       |   |                 |          |
|---|-------------|-------|-------|---|-----------------|----------|
| 0 | 0,582295914 | 0,904 | 0,733 | 0 | Pyramidal (CA3) | Epha7    |
| 0 | 0,580156568 | 0,975 | 0,872 | 0 | Pyramidal (CA3) | Nrg3os   |
| 0 | 0,578547715 | 0,537 | 0,125 | 0 | Pyramidal (CA3) | Hpca     |
| 0 | 0,57827399  | 0,996 | 0,909 | 0 | Pyramidal (CA3) | Snap25   |
| 0 | 0,577713045 | 0,519 | 0,121 | 0 | Pyramidal (CA3) | Socs2    |
| 0 | 0,577380133 | 0,789 | 0,447 | 0 | Pyramidal (CA3) | Trpc5    |
| 0 | 0,57287271  | 0,944 | 0,765 | 0 | Pyramidal (CA3) | Aff3     |
| 0 | 0,572207024 | 0,997 | 0,936 | 0 | Pyramidal (CA3) | Prkce    |
| 0 | 0,570128707 | 0,929 | 0,733 | 0 | Pyramidal (CA3) | Prkag2   |
| 0 | 0,569853307 | 0,887 | 0,624 | 0 | Pyramidal (CA3) | Adcy9    |
| 0 | 0,567505316 | 0,653 | 0,283 | 0 | Pyramidal (CA3) | Gabra5   |
| 0 | 0,565814544 | 0,907 | 0,726 | 0 | Pyramidal (CA3) | Bcl11a   |
| 0 | 0,563616545 | 0,636 | 0,238 | 0 | Pyramidal (CA3) | Tgfbr3   |
| 0 | 0,563173964 | 0,69  | 0,442 | 0 | Pyramidal (CA3) | Fstl4    |
| 0 | 0,560595136 | 0,576 | 0,2   | 0 | Pyramidal (CA3) | Col4a1   |
| 0 | 0,560453112 | 0,795 | 0,428 | 0 | Pyramidal (CA3) | Kcnq2    |
| 0 | 0,557589348 | 0,761 | 0,392 | 0 | Pyramidal (CA3) | Matk     |
| 0 | 0,555128324 | 0,523 | 0,132 | 0 | Pyramidal (CA3) | Golm1    |
| 0 | 0,554775813 | 0,707 | 0,356 | 0 | Pyramidal (CA3) | Slc4a7   |
| 0 | 0,554764108 | 0,654 | 0,281 | 0 | Pyramidal (CA3) | Nrp2     |
| 0 | 0,553416477 | 0,993 | 0,937 | 0 | Pyramidal (CA3) | Mapk10   |
| 0 | 0,54956183  | 0,967 | 0,88  | 0 | Pyramidal (CA3) | Pclo     |
| 0 | 0,548065014 | 0,942 | 0,774 | 0 | Pyramidal (CA3) | Amph     |
| 0 | 0,547374586 | 0,713 | 0,353 | 0 | Pyramidal (CA3) | Myrip    |
| 0 | 0,547027666 | 0,657 | 0,307 | 0 | Pyramidal (CA3) | Gm13269  |
| 0 | 0,544100325 | 0,745 | 0,395 | 0 | Pyramidal (CA3) | Madd     |
| 0 | 0,539233338 | 0,999 | 0,965 | 0 | Pyramidal (CA3) | Grm7     |
| 0 | 0,538363165 | 0,743 | 0,394 | 0 | Pyramidal (CA3) | Efr3a    |
| 0 | 0,534878922 | 0,875 | 0,608 | 0 | Pyramidal (CA3) | Acp1     |
| 0 | 0,533808648 | 0,653 | 0,301 | 0 | Pyramidal (CA3) | Smpd3    |
| 0 | 0,532655073 | 0,809 | 0,479 | 0 | Pyramidal (CA3) | Dnm1     |
| 0 | 0,531053748 | 0,618 | 0,32  | 0 | Pyramidal (CA3) | Lmo4     |
| 0 | 0,530801848 | 0,993 | 0,958 | 0 | Pyramidal (CA3) | Xkr4     |
| 0 | 0,529934499 | 0,668 | 0,307 | 0 | Pyramidal (CA3) | Cul4a    |
| 0 | 0,525225994 | 0,987 | 0,841 | 0 | Pyramidal (CA3) | Tmem178b |
| 0 | 0,52425159  | 0,675 | 0,31  | 0 | Pyramidal (CA3) | Lingo1   |
| 0 | 0,520205866 | 0,997 | 0,95  | 0 | Pyramidal (CA3) | Gabrb3   |
| 0 | 0,520125858 | 0,999 | 0,938 | 0 | Pyramidal (CA3) | Camk2a   |
| 0 | 0,516455449 | 0,559 | 0,205 | 0 | Pyramidal (CA3) | Bicc1    |
| 0 | 0,51434705  | 0,91  | 0,706 | 0 | Pyramidal (CA3) | Dnajc6   |
| 0 | 0,513592719 | 0,595 | 0,23  | 0 | Pyramidal (CA3) | Cabp1    |
| 0 | 0,510202692 | 0,88  | 0,683 | 0 | Pyramidal (CA3) | Rimbp2   |
| 0 | 0,509125432 | 0,849 | 0,676 | 0 | Pyramidal (CA3) | Slc35f3  |

|   |             |       |       |   |                 |         |
|---|-------------|-------|-------|---|-----------------|---------|
| 0 | 0,50865304  | 0,988 | 0,857 | 0 | Pyramidal (CA3) | Atp2b1  |
| 0 | 0,508198108 | 0,802 | 0,444 | 0 | Pyramidal (CA3) | Runx1t1 |
| 0 | 0,506727478 | 0,999 | 0,899 | 0 | Pyramidal (CA3) | Snhg11  |
| 0 | 0,504438784 | 0,935 | 0,913 | 0 | Pyramidal (CA3) | Oxr1    |
| 0 | 0,503039261 | 1     | 0,983 | 0 | Pyramidal (CA3) | Gria2   |
| 0 | 0,502069281 | 1     | 1     | 0 | Pyramidal (CA3) | Malat1  |
| 0 | 0,501784806 | 0,551 | 0,197 | 0 | Pyramidal (CA3) | Rgs11   |
| 0 | 0,500187109 | 0,891 | 0,697 | 0 | Pyramidal (CA3) | Kcnt2   |

|   |             |       |       |   |              |               |
|---|-------------|-------|-------|---|--------------|---------------|
| 0 | 3,022500861 | 0,879 | 0,331 | 0 | Interneurons | Erbp4         |
| 0 | 2,564408104 | 0,984 | 0,744 | 0 | Interneurons | Grip1         |
| 0 | 2,466047163 | 0,764 | 0,1   | 0 | Interneurons | Nxph1         |
| 0 | 2,439878623 | 0,647 | 0,457 | 0 | Interneurons | Adarb2        |
| 0 | 2,229098967 | 0,774 | 0,148 | 0 | Interneurons | Grik1         |
| 0 | 2,149632303 | 0,747 | 0,035 | 0 | Interneurons | Kcnmb2        |
| 0 | 2,06579625  | 0,921 | 0,24  | 0 | Interneurons | Rbms3         |
| 0 | 2,05164543  | 0,836 | 0,386 | 0 | Interneurons | Kcnc2         |
| 0 | 1,787834702 | 0,581 | 0,094 | 0 | Interneurons | C130073E24Rik |
| 0 | 1,724532885 | 0,61  | 0,246 | 0 | Interneurons | Col25a1       |
| 0 | 1,640692222 | 0,551 | 0,074 | 0 | Interneurons | Col19a1       |
| 0 | 1,628223802 | 0,894 | 0,615 | 0 | Interneurons | Gabrg3        |
| 0 | 1,601500209 | 0,741 | 0,192 | 0 | Interneurons | Ptpm          |
| 0 | 1,507424934 | 0,683 | 0,34  | 0 | Interneurons | Fgf13         |
| 0 | 1,506854574 | 0,932 | 0,668 | 0 | Interneurons | Galnt16       |
| 0 | 1,470972289 | 0,697 | 0,077 | 0 | Interneurons | Kcnip1        |
| 0 | 1,419474203 | 0,587 | 0,013 | 0 | Interneurons | Dlx6os1       |
| 0 | 1,39134954  | 0,619 | 0,112 | 0 | Interneurons | Cntnap4       |
| 0 | 1,376874885 | 0,629 | 0,063 | 0 | Interneurons | Alk           |
| 0 | 1,322858748 | 0,814 | 0,37  | 0 | Interneurons | Unc5d         |
| 0 | 1,310465589 | 0,975 | 0,668 | 0 | Interneurons | Gria4         |
| 0 | 1,277010909 | 0,657 | 0,014 | 0 | Interneurons | Gad2          |
| 0 | 1,219116736 | 0,585 | 0,239 | 0 | Interneurons | Zfp804b       |
| 0 | 1,215602511 | 0,781 | 0,244 | 0 | Interneurons | Elavl2        |
| 0 | 1,206727088 | 0,556 | 0,025 | 0 | Interneurons | Btd11         |
| 0 | 1,192905251 | 0,941 | 0,8   | 0 | Interneurons | Robo1         |
| 0 | 1,18364845  | 0,996 | 0,94  | 0 | Interneurons | Nrxn3         |
| 0 | 1,17733423  | 1     | 0,897 | 0 | Interneurons | Snhg11        |
| 0 | 1,156868232 | 0,789 | 0,223 | 0 | Interneurons | Cit           |
| 0 | 1,147369808 | 0,988 | 0,925 | 0 | Interneurons | Fgf12         |
| 0 | 1,11204349  | 0,647 | 0,064 | 0 | Interneurons | Gad1          |
| 0 | 1,098338684 | 0,999 | 0,976 | 0 | Interneurons | Meg3          |
| 0 | 1,096668758 | 0,873 | 0,719 | 0 | Interneurons | Cntn5         |
| 0 | 1,025035039 | 0,519 | 0,106 | 0 | Interneurons | Kctd8         |

|   |             |       |       |   |              |               |
|---|-------------|-------|-------|---|--------------|---------------|
| 0 | 1,019525709 | 0,522 | 0,07  | 0 | Interneurons | Gm38505       |
| 0 | 1,013311363 | 0,795 | 0,282 | 0 | Interneurons | Sox2ot        |
| 0 | 1,00884157  | 0,629 | 0,07  | 0 | Interneurons | Nhs           |
| 0 | 1,003012674 | 0,895 | 0,727 | 0 | Interneurons | Etl4          |
| 0 | 0,997194269 | 0,8   | 0,325 | 0 | Interneurons | Usp29         |
| 0 | 0,994023585 | 0,554 | 0,045 | 0 | Interneurons | Maf           |
| 0 | 0,963753278 | 0,887 | 0,641 | 0 | Interneurons | Astn2         |
| 0 | 0,95314958  | 0,663 | 0,316 | 0 | Interneurons | Cdh13         |
| 0 | 0,942826709 | 0,841 | 0,419 | 0 | Interneurons | Spock3        |
| 0 | 0,938858277 | 0,992 | 0,871 | 0 | Interneurons | Cntnap2       |
| 0 | 0,919906295 | 0,822 | 0,555 | 0 | Interneurons | Sgcz          |
| 0 | 0,919239493 | 0,872 | 0,46  | 0 | Interneurons | 5330434G04Rik |
| 0 | 0,913738904 | 0,588 | 0,22  | 0 | Interneurons | Sdk1          |
| 0 | 0,911724863 | 0,787 | 0,339 | 0 | Interneurons | Zfp536        |
| 0 | 0,908250376 | 0,761 | 0,419 | 0 | Interneurons | Npas3         |
| 0 | 0,888988839 | 0,828 | 0,366 | 0 | Interneurons | Peg3          |
| 0 | 0,887151673 | 0,627 | 0,203 | 0 | Interneurons | Myo16         |
| 0 | 0,879379157 | 0,816 | 0,376 | 0 | Interneurons | Rab3c         |
| 0 | 0,867769649 | 0,866 | 0,449 | 0 | Interneurons | A330076H08Rik |
| 0 | 0,857625486 | 0,708 | 0,253 | 0 | Interneurons | Dner          |
| 0 | 0,855749344 | 0,584 | 0,204 | 0 | Interneurons | Fstl5         |
| 0 | 0,852956186 | 0,866 | 0,673 | 0 | Interneurons | Tenm3         |
| 0 | 0,852734403 | 0,633 | 0,258 | 0 | Interneurons | Cdh18         |
| 0 | 0,838776504 | 0,745 | 0,349 | 0 | Interneurons | Esrrg         |
| 0 | 0,830616338 | 0,652 | 0,157 | 0 | Interneurons | Slc6a1        |
| 0 | 0,822793249 | 0,877 | 0,706 | 0 | Interneurons | Tenm1         |
| 0 | 0,804978242 | 0,988 | 0,84  | 0 | Interneurons | Rian          |
| 0 | 0,799037067 | 0,873 | 0,63  | 0 | Interneurons | Slc2a13       |
| 0 | 0,797224859 | 0,992 | 0,957 | 0 | Interneurons | Xkr4          |
| 0 | 0,792841897 | 0,943 | 0,902 | 0 | Interneurons | Asic2         |
| 0 | 0,788851742 | 0,801 | 0,614 | 0 | Interneurons | Zmat4         |
| 0 | 0,788653158 | 0,594 | 0,168 | 0 | Interneurons | Vstm2a        |
| 0 | 0,786658792 | 0,577 | 0,143 | 0 | Interneurons | Kcnc1         |
| 0 | 0,76521104  | 0,715 | 0,358 | 0 | Interneurons | Nyap2         |
| 0 | 0,764060993 | 0,954 | 0,77  | 0 | Interneurons | A230057D06Rik |
| 0 | 0,751226624 | 0,613 | 0,238 | 0 | Interneurons | Ubash3b       |
| 0 | 0,750680273 | 0,656 | 0,376 | 0 | Interneurons | Thsd7a        |
| 0 | 0,740245003 | 0,646 | 0,238 | 0 | Interneurons | Rasgrf2       |
| 0 | 0,732155714 | 0,991 | 0,952 | 0 | Interneurons | Sntg1         |
| 0 | 0,727969762 | 0,983 | 0,875 | 0 | Interneurons | Rims2         |
| 0 | 0,724432356 | 0,894 | 0,652 | 0 | Interneurons | Hcn1          |
| 0 | 0,721243335 | 0,876 | 0,683 | 0 | Interneurons | Pam           |
| 0 | 0,707588417 | 0,549 | 0,173 | 0 | Interneurons | Cntn6         |

|   |             |       |       |   |              |               |
|---|-------------|-------|-------|---|--------------|---------------|
| 0 | 0,703160504 | 0,761 | 0,368 | 0 | Interneurons | Ptchd4        |
| 0 | 0,699064361 | 0,772 | 0,463 | 0 | Interneurons | Sh3rf3        |
| 0 | 0,696299529 | 0,538 | 0,268 | 0 | Interneurons | Grm8          |
| 0 | 0,690982246 | 0,989 | 0,908 | 0 | Interneurons | Pde4d         |
| 0 | 0,680930546 | 0,571 | 0,201 | 0 | Interneurons | Osbpl3        |
| 0 | 0,679133807 | 0,859 | 0,666 | 0 | Interneurons | Thrb          |
| 0 | 0,662836883 | 0,707 | 0,279 | 0 | Interneurons | Gaml3         |
| 0 | 0,658135826 | 0,687 | 0,444 | 0 | Interneurons | Slc44a5       |
| 0 | 0,655633072 | 0,584 | 0,283 | 0 | Interneurons | Serpini1      |
| 0 | 0,655621632 | 0,703 | 0,34  | 0 | Interneurons | Cntnap5c      |
| 0 | 0,637231201 | 0,52  | 0,126 | 0 | Interneurons | Ank1          |
| 0 | 0,633432753 | 0,732 | 0,329 | 0 | Interneurons | Mirg          |
| 0 | 0,632795484 | 0,858 | 0,671 | 0 | Interneurons | Zfp385b       |
| 0 | 0,623716117 | 0,814 | 0,494 | 0 | Interneurons | Slc35f1       |
| 0 | 0,620484529 | 0,994 | 0,964 | 0 | Interneurons | Ube3a         |
| 0 | 0,615235101 | 0,739 | 0,338 | 0 | Interneurons | Dlc1          |
| 0 | 0,613278957 | 0,839 | 0,553 | 0 | Interneurons | Scn1a         |
| 0 | 0,608037131 | 0,602 | 0,285 | 0 | Interneurons | Tmem132d      |
| 0 | 0,603601216 | 0,763 | 0,636 | 0 | Interneurons | Cntn4         |
| 0 | 0,603150614 | 0,962 | 0,878 | 0 | Interneurons | Pclo          |
| 0 | 0,598451447 | 0,993 | 0,952 | 0 | Interneurons | Dpp6          |
| 0 | 0,597553279 | 0,994 | 0,936 | 0 | Interneurons | Snhg14        |
| 0 | 0,596779155 | 0,707 | 0,572 | 0 | Interneurons | Zfp804a       |
| 0 | 0,596156496 | 0,728 | 0,351 | 0 | Interneurons | C530008M17Rik |
| 0 | 0,591604714 | 0,735 | 0,43  | 0 | Interneurons | Srrm4         |
| 0 | 0,590607406 | 0,633 | 0,429 | 0 | Interneurons | Synpr         |
| 0 | 0,587057441 | 0,993 | 0,954 | 0 | Interneurons | Cadps         |
| 0 | 0,583481656 | 0,519 | 0,173 | 0 | Interneurons | Ccdc136       |
| 0 | 0,583127809 | 0,565 | 0,203 | 0 | Interneurons | Plcb4         |
| 0 | 0,57741461  | 0,508 | 0,135 | 0 | Interneurons | Ankrd24       |
| 0 | 0,570510954 | 0,516 | 0,198 | 0 | Interneurons | Utrn          |
| 0 | 0,560129923 | 0,711 | 0,517 | 0 | Interneurons | Neto1         |
| 0 | 0,556102352 | 0,87  | 0,637 | 0 | Interneurons | Klf12         |
| 0 | 0,555927997 | 0,522 | 0,164 | 0 | Interneurons | Cux2          |
| 0 | 0,555270204 | 0,705 | 0,384 | 0 | Interneurons | Ripor2        |
| 0 | 0,55437427  | 0,722 | 0,356 | 0 | Interneurons | B830012L14Rik |
| 0 | 0,554310045 | 0,769 | 0,701 | 0 | Interneurons | A830018L16Rik |
| 0 | 0,550642584 | 0,54  | 0,22  | 0 | Interneurons | Efna5         |
| 0 | 0,54485896  | 0,799 | 0,557 | 0 | Interneurons | A230006K03Rik |
| 0 | 0,542441588 | 0,505 | 0,14  | 0 | Interneurons | Abat          |
| 0 | 0,530627484 | 0,52  | 0,161 | 0 | Interneurons | Dcx           |
| 0 | 0,530409111 | 0,979 | 0,961 | 0 | Interneurons | Grik2         |
| 0 | 0,527246068 | 0,8   | 0,557 | 0 | Interneurons | Pcdh15        |

|           |             |       |       |           |              |               |
|-----------|-------------|-------|-------|-----------|--------------|---------------|
| 0         | 0,526216448 | 0,51  | 0,166 | 0         | Interneurons | 9630014M24Rik |
| 0         | 0,525436485 | 0,84  | 0,646 | 0         | Interneurons | Mef2c         |
| 0         | 0,525318811 | 0,777 | 0,43  | 0         | Interneurons | Xkr6          |
| 0         | 0,522339612 | 0,805 | 0,487 | 0         | Interneurons | Atp8a2        |
| 0         | 0,520332304 | 0,571 | 0,235 | 0         | Interneurons | Las1l         |
| 0         | 0,514998312 | 0,565 | 0,37  | 0         | Interneurons | Tmtc2         |
| 0         | 0,505784081 | 0,579 | 0,288 | 0         | Interneurons | Pdzrn4        |
| 1,79E-301 | 0,524758823 | 0,661 | 0,488 | 4,82E-297 | Interneurons | Ptprt         |
| 1,44E-93  | 0,522027992 | 0,522 | 0,439 | 3,88E-89  | Interneurons | Ntng1         |

|   |             |       |       |   |           |          |
|---|-------------|-------|-------|---|-----------|----------|
| 0 | 2,211808811 | 0,857 | 0,132 | 0 | Microglia | Tgfr1    |
| 0 | 2,100596115 | 0,822 | 0,016 | 0 | Microglia | Inpp5d   |
| 0 | 2,047516344 | 0,937 | 0,445 | 0 | Microglia | Plxdc2   |
| 0 | 1,992814237 | 0,832 | 0,1   | 0 | Microglia | Zfhx3    |
| 0 | 1,934250729 | 0,925 | 0,362 | 0 | Microglia | Elmo1    |
| 0 | 1,779319937 | 0,706 | 0,048 | 0 | Microglia | Hexb     |
| 0 | 1,743197463 | 0,968 | 0,676 | 0 | Microglia | Srgap2   |
| 0 | 1,735080728 | 0,708 | 0,032 | 0 | Microglia | Apb1ip   |
| 0 | 1,724262378 | 0,765 | 0,146 | 0 | Microglia | Epb41l2  |
| 0 | 1,720889318 | 0,805 | 0,131 | 0 | Microglia | Mertk    |
| 0 | 1,699178059 | 0,864 | 0,352 | 0 | Microglia | Tmcc3    |
| 0 | 1,605334545 | 0,673 | 0,012 | 0 | Microglia | Dock8    |
| 0 | 1,560857606 | 0,665 | 0,111 | 0 | Microglia | Lrmda    |
| 0 | 1,504000178 | 0,656 | 0,008 | 0 | Microglia | Csf1r    |
| 0 | 1,494208939 | 0,919 | 0,564 | 0 | Microglia | Mef2a    |
| 0 | 1,463072206 | 0,602 | 0,009 | 0 | Microglia | Ly86     |
| 0 | 1,44886489  | 0,587 | 0,007 | 0 | Microglia | Siglech  |
| 0 | 1,432167435 | 0,829 | 0,447 | 0 | Microglia | Mbnl1    |
| 0 | 1,417523202 | 0,718 | 0,264 | 0 | Microglia | Pde3b    |
| 0 | 1,41445148  | 0,613 | 0,019 | 0 | Microglia | Dock2    |
| 0 | 1,412726299 | 0,708 | 0,192 | 0 | Microglia | Lyn      |
| 0 | 1,41152623  | 0,597 | 0,008 | 0 | Microglia | Fyb      |
| 0 | 1,382242262 | 0,571 | 0,007 | 0 | Microglia | Ikzf1    |
| 0 | 1,380443742 | 0,993 | 0,948 | 0 | Microglia | Nav2     |
| 0 | 1,37815751  | 0,6   | 0,05  | 0 | Microglia | Cx3cr1   |
| 0 | 1,371394904 | 0,598 | 0,02  | 0 | Microglia | Fli1     |
| 0 | 1,354670274 | 0,993 | 0,95  | 0 | Microglia | Tanc2    |
| 0 | 1,346142    | 0,622 | 0,008 | 0 | Microglia | Arhgap45 |
| 0 | 1,307788947 | 0,564 | 0,007 | 0 | Microglia | Gm10790  |
| 0 | 1,303639616 | 0,547 | 0,008 | 0 | Microglia | Runx1    |
| 0 | 1,293990051 | 0,689 | 0,205 | 0 | Microglia | Rreb1    |
| 0 | 1,287954799 | 0,571 | 0,013 | 0 | Microglia | Slco2b1  |
| 0 | 1,2758885   | 0,691 | 0,247 | 0 | Microglia | Pag1     |

|   |             |       |       |   |           |               |
|---|-------------|-------|-------|---|-----------|---------------|
| 0 | 1,27331454  | 0,816 | 0,374 | 0 | Microglia | Maml3         |
| 0 | 1,241396915 | 0,814 | 0,464 | 0 | Microglia | Numb          |
| 0 | 1,208109351 | 0,951 | 0,768 | 0 | Microglia | Ldlrad4       |
| 0 | 1,200955953 | 0,541 | 0,04  | 0 | Microglia | Itgb5         |
| 0 | 1,194985642 | 0,536 | 0,039 | 0 | Microglia | Entpd1        |
| 0 | 1,192843874 | 0,901 | 0,541 | 0 | Microglia | Dleu2         |
| 0 | 1,191045956 | 0,502 | 0,006 | 0 | Microglia | Selplg        |
| 0 | 1,190771168 | 0,669 | 0,177 | 0 | Microglia | Ankrd44       |
| 0 | 1,189280235 | 0,592 | 0,144 | 0 | Microglia | Hpgds         |
| 0 | 1,182589469 | 0,613 | 0,158 | 0 | Microglia | Zfp710        |
| 0 | 1,17918239  | 0,61  | 0,193 | 0 | Microglia | P2ry12        |
| 0 | 1,170536062 | 0,92  | 0,615 | 0 | Microglia | Slc9a9        |
| 0 | 1,159256083 | 0,727 | 0,389 | 0 | Microglia | Ophn1         |
| 0 | 1,151739995 | 0,703 | 0,312 | 0 | Microglia | Gab2          |
| 0 | 1,142792165 | 0,535 | 0,021 | 0 | Microglia | Cyth4         |
| 0 | 1,142399639 | 0,954 | 0,586 | 0 | Microglia | Foxn3         |
| 0 | 1,136464228 | 0,516 | 0,013 | 0 | Microglia | Hk2           |
| 0 | 1,127680155 | 0,508 | 0,013 | 0 | Microglia | Adap2         |
| 0 | 1,105249559 | 0,697 | 0,397 | 0 | Microglia | 493340618Rik  |
| 0 | 1,100996628 | 0,743 | 0,407 | 0 | Microglia | Fchsd2        |
| 0 | 1,097101604 | 0,741 | 0,371 | 0 | Microglia | Pip4k2a       |
| 0 | 1,086392883 | 0,559 | 0,112 | 0 | Microglia | Lgmn          |
| 0 | 1,079335072 | 0,538 | 0,111 | 0 | Microglia | Lpcat2        |
| 0 | 1,075486818 | 0,549 | 0,179 | 0 | Microglia | E230029C05Rik |
| 0 | 1,074442759 | 0,571 | 0,182 | 0 | Microglia | Ivns1abp      |
| 0 | 1,035209264 | 0,997 | 0,973 | 0 | Microglia | Csmd3         |
| 0 | 1,022152758 | 0,507 | 0,083 | 0 | Microglia | St3gal6       |
| 0 | 1,016073853 | 0,955 | 0,805 | 0 | Microglia | Ssh2          |
| 0 | 0,996251757 | 0,719 | 0,405 | 0 | Microglia | Snx29         |
| 0 | 0,962661505 | 0,551 | 0,141 | 0 | Microglia | Bmp2k         |
| 0 | 0,949832626 | 0,934 | 0,655 | 0 | Microglia | Mef2c         |
| 0 | 0,945037214 | 0,906 | 0,488 | 0 | Microglia | Frmd4b        |
| 0 | 0,941901771 | 0,63  | 0,263 | 0 | Microglia | Ubash3b       |
| 0 | 0,926408679 | 0,573 | 0,251 | 0 | Microglia | Sirpa         |
| 0 | 0,91919561  | 0,547 | 0,161 | 0 | Microglia | Chn2          |
| 0 | 0,91753115  | 0,966 | 0,842 | 0 | Microglia | Chd9          |
| 0 | 0,914935661 | 0,672 | 0,366 | 0 | Microglia | Picalm        |
| 0 | 0,892359913 | 0,741 | 0,389 | 0 | Microglia | Inpp4b        |
| 0 | 0,886237329 | 0,515 | 0,167 | 0 | Microglia | Serinc3       |
| 0 | 0,884938151 | 0,826 | 0,554 | 0 | Microglia | Fam49b        |
| 0 | 0,876298013 | 0,54  | 0,136 | 0 | Microglia | Cst3          |
| 0 | 0,868739435 | 0,721 | 0,449 | 0 | Microglia | Arhgap5       |
| 0 | 0,866298191 | 0,684 | 0,416 | 0 | Microglia | Lrch1         |

|           |             |       |       |           |           |            |
|-----------|-------------|-------|-------|-----------|-----------|------------|
| 0         | 0,85493726  | 0,507 | 0,158 | 0         | Microglia | Wasf2      |
| 0         | 0,834571393 | 0,956 | 0,553 | 0         | Microglia | Qk         |
| 0         | 0,833337285 | 0,532 | 0,187 | 0         | Microglia | Rrbp1      |
| 0         | 0,811152886 | 0,769 | 0,522 | 0         | Microglia | Dennd4a    |
| 0         | 0,778038563 | 0,563 | 0,298 | 0         | Microglia | Smap2      |
| 0         | 0,773670531 | 0,877 | 0,699 | 0         | Microglia | Rapgef5    |
| 0         | 0,767296796 | 0,838 | 0,594 | 0         | Microglia | Rap1gds1   |
| 0         | 0,764651635 | 0,947 | 0,787 | 0         | Microglia | Dip2b      |
| 0         | 0,739829321 | 0,927 | 0,772 | 0         | Microglia | Ptprj      |
| 0         | 0,733511381 | 0,583 | 0,362 | 0         | Microglia | Abhd12     |
| 0         | 0,732504675 | 0,95  | 0,526 | 0         | Microglia | Dock10     |
| 0         | 0,695673786 | 0,922 | 0,763 | 0         | Microglia | Diaph2     |
| 0         | 0,692300964 | 0,723 | 0,49  | 0         | Microglia | Cyfip1     |
| 0         | 0,688840854 | 0,532 | 0,295 | 0         | Microglia | Etv6       |
| 0         | 0,686546622 | 0,577 | 0,34  | 0         | Microglia | Akap13     |
| 0         | 0,682022834 | 0,873 | 0,619 | 0         | Microglia | Wnk1       |
| 0         | 0,671319732 | 0,905 | 0,676 | 0         | Microglia | Tbc1d5     |
| 0         | 0,643256301 | 0,804 | 0,538 | 0         | Microglia | Bin1       |
| 0         | 0,633056207 | 0,95  | 0,639 | 0         | Microglia | Plcl1      |
| 0         | 0,62555676  | 0,519 | 0,267 | 0         | Microglia | Ttc28      |
| 0         | 0,607415663 | 0,58  | 0,316 | 0         | Microglia | Camk2d     |
| 0         | 0,589458187 | 0,988 | 0,933 | 0         | Microglia | Dock4      |
| 0         | 0,576025783 | 0,806 | 0,568 | 0         | Microglia | Tacc1      |
| 0         | 0,538464423 | 0,915 | 0,543 | 0         | Microglia | Maml2      |
| 1,11E-301 | 0,785456573 | 0,622 | 0,421 | 2,99E-297 | Microglia | Plcl2      |
| 1,78E-301 | 0,540534721 | 0,972 | 0,891 | 4,79E-297 | Microglia | Ddx5       |
| 8,60E-280 | 0,617647609 | 0,824 | 0,622 | 2,32E-275 | Microglia | Zswim6     |
| 9,81E-280 | 0,514677772 | 0,884 | 0,71  | 2,64E-275 | Microglia | Phf14      |
| 2,26E-274 | 0,547379544 | 0,798 | 0,59  | 6,08E-270 | Microglia | Ppm1h      |
| 3,96E-271 | 0,521516919 | 0,844 | 0,646 | 1,07E-266 | Microglia | Pan3       |
| 1,22E-264 | 0,72103933  | 0,565 | 0,365 | 3,28E-260 | Microglia | Fhit       |
| 4,46E-254 | 0,616133849 | 0,651 | 0,459 | 1,20E-249 | Microglia | Gm35188    |
| 2,21E-237 | 0,542309999 | 0,746 | 0,557 | 5,96E-233 | Microglia | Ulk2       |
| 1,49E-235 | 0,613312317 | 0,542 | 0,363 | 4,01E-231 | Microglia | Ints6l     |
| 2,22E-232 | 0,63902284  | 0,955 | 0,879 | 5,97E-228 | Microglia | Slc8a1     |
| 1,04E-225 | 0,510010623 | 0,913 | 0,787 | 2,80E-221 | Microglia | AC149090.1 |
| 2,22E-222 | 0,582028482 | 0,635 | 0,479 | 5,98E-218 | Microglia | Slc12a6    |
| 3,87E-220 | 0,562158752 | 0,708 | 0,513 | 1,04E-215 | Microglia | Atp8a2     |
| 1,12E-212 | 0,500734691 | 0,512 | 0,315 | 3,01E-208 | Microglia | Pik3r1     |
| 2,42E-207 | 0,520633481 | 0,527 | 0,351 | 6,52E-203 | Microglia | Arhgap17   |
| 1,59E-206 | 0,545742028 | 0,503 | 0,323 | 4,29E-202 | Microglia | Mitf       |
| 9,25E-203 | 0,583808935 | 0,544 | 0,37  | 2,49E-198 | Microglia | Fgf13      |
| 2,03E-198 | 0,52317046  | 0,527 | 0,351 | 5,47E-194 | Microglia | Sh3kbp1    |

|           |             |       |       |           |           |         |
|-----------|-------------|-------|-------|-----------|-----------|---------|
| 8,21E-193 | 0,550043476 | 0,557 | 0,397 | 2,21E-188 | Microglia | Snx24   |
| 4,46E-173 | 0,517124051 | 0,551 | 0,403 | 1,20E-168 | Microglia | Rnf216  |
| 3,06E-158 | 0,500098879 | 0,604 | 0,482 | 8,24E-154 | Microglia | Tmem135 |

|   |             |       |       |   |            |          |
|---|-------------|-------|-------|---|------------|----------|
| 0 | 3,645919163 | 0,999 | 0,513 | 0 | Astrocytes | Slc1a2   |
| 0 | 3,332532409 | 0,995 | 0,517 | 0 | Astrocytes | Gpc5     |
| 0 | 3,124710935 | 0,929 | 0,11  | 0 | Astrocytes | Apoe     |
| 0 | 2,607687096 | 0,945 | 0,163 | 0 | Astrocytes | Slc1a3   |
| 0 | 2,540073128 | 0,993 | 0,624 | 0 | Astrocytes | Wdr17    |
| 0 | 2,510057443 | 0,812 | 0,087 | 0 | Astrocytes | Cst3     |
| 0 | 2,391858574 | 0,911 | 0,095 | 0 | Astrocytes | Atp1a2   |
| 0 | 2,381933802 | 0,898 | 0,096 | 0 | Astrocytes | Plpp3    |
| 0 | 2,333349335 | 0,916 | 0,244 | 0 | Astrocytes | Prex2    |
| 0 | 2,298988092 | 0,892 | 0,157 | 0 | Astrocytes | Rgs20    |
| 0 | 2,284756658 | 0,993 | 0,403 | 0 | Astrocytes | Npas3    |
| 0 | 2,23719826  | 0,985 | 0,58  | 0 | Astrocytes | Gm3764   |
| 0 | 2,236840213 | 0,873 | 0,151 | 0 | Astrocytes | Rorb     |
| 0 | 2,185874299 | 0,989 | 0,539 | 0 | Astrocytes | Msi2     |
| 0 | 2,127492628 | 0,989 | 0,657 | 0 | Astrocytes | Tspan7   |
| 0 | 2,104436112 | 0,944 | 0,279 | 0 | Astrocytes | Ptprz1   |
| 0 | 2,069112999 | 1     | 0,794 | 0 | Astrocytes | Ntm      |
| 0 | 2,017016081 | 1     | 0,991 | 0 | Astrocytes | Nrxn1    |
| 0 | 1,940185242 | 0,832 | 0,223 | 0 | Astrocytes | Sparcl1  |
| 0 | 1,897742701 | 0,901 | 0,359 | 0 | Astrocytes | Pitpnc1  |
| 0 | 1,862035579 | 0,996 | 0,756 | 0 | Astrocytes | Dtna     |
| 0 | 1,85176405  | 0,999 | 0,908 | 0 | Astrocytes | Rora     |
| 0 | 1,850367811 | 0,775 | 0,098 | 0 | Astrocytes | Mertk    |
| 0 | 1,825404254 | 0,982 | 0,672 | 0 | Astrocytes | Cpe      |
| 0 | 1,815274413 | 0,955 | 0,472 | 0 | Astrocytes | Slc4a4   |
| 0 | 1,799074503 | 0,898 | 0,398 | 0 | Astrocytes | Farp1    |
| 0 | 1,789073622 | 0,663 | 0,044 | 0 | Astrocytes | Clu      |
| 0 | 1,763163618 | 0,748 | 0,047 | 0 | Astrocytes | Gm6145   |
| 0 | 1,747973897 | 0,901 | 0,519 | 0 | Astrocytes | Luzp2    |
| 0 | 1,697948031 | 0,805 | 0,144 | 0 | Astrocytes | Lama2    |
| 0 | 1,689498956 | 0,947 | 0,48  | 0 | Astrocytes | Gm42418  |
| 0 | 1,685704904 | 0,764 | 0,185 | 0 | Astrocytes | Acsl3    |
| 0 | 1,66113309  | 1     | 0,957 | 0 | Astrocytes | Gabrb1   |
| 0 | 1,635081282 | 0,798 | 0,268 | 0 | Astrocytes | Sfxn5    |
| 0 | 1,623880033 | 0,727 | 0,157 | 0 | Astrocytes | Gm20713  |
| 0 | 1,602907925 | 0,993 | 0,703 | 0 | Astrocytes | Nfia     |
| 0 | 1,601821209 | 0,999 | 0,931 | 0 | Astrocytes | Mir99ahg |
| 0 | 1,593177874 | 0,701 | 0,059 | 0 | Astrocytes | Nwd1     |
| 0 | 1,571544915 | 0,741 | 0,156 | 0 | Astrocytes | Bcan     |

|   |             |       |       |   |            |          |
|---|-------------|-------|-------|---|------------|----------|
| 0 | 1,527642704 | 0,765 | 0,233 | 0 | Astrocytes | Cspg5    |
| 0 | 1,513017373 | 0,656 | 0,056 | 0 | Astrocytes | Pla2g7   |
| 0 | 1,501504725 | 0,632 | 0,101 | 0 | Astrocytes | Nhs1     |
| 0 | 1,494380478 | 0,567 | 0,047 | 0 | Astrocytes | Mt1      |
| 0 | 1,489383899 | 1     | 0,979 | 0 | Astrocytes | Son      |
| 0 | 1,48170897  | 0,648 | 0,081 | 0 | Astrocytes | Bmpr1b   |
| 0 | 1,473784175 | 0,634 | 0,04  | 0 | Astrocytes | Gli3     |
| 0 | 1,468377544 | 1     | 0,982 | 0 | Astrocytes | Ctnnd2   |
| 0 | 1,456166406 | 0,628 | 0,056 | 0 | Astrocytes | Htra1    |
| 0 | 1,454360752 | 0,957 | 0,525 | 0 | Astrocytes | Grm3     |
| 0 | 1,440835153 | 0,999 | 0,963 | 0 | Astrocytes | Macf1    |
| 0 | 1,434500113 | 0,91  | 0,585 | 0 | Astrocytes | Hdac8    |
| 0 | 1,432973471 | 1     | 0,988 | 0 | Astrocytes | Lsamp    |
| 0 | 1,420061947 | 0,991 | 0,698 | 0 | Astrocytes | Mir100hg |
| 0 | 1,405102891 | 0,656 | 0,147 | 0 | Astrocytes | Paqr8    |
| 0 | 1,402180691 | 0,622 | 0,135 | 0 | Astrocytes | Phka1    |
| 0 | 1,380218807 | 0,95  | 0,463 | 0 | Astrocytes | Ptprt    |
| 0 | 1,373936279 | 0,763 | 0,312 | 0 | Astrocytes | Sash1    |
| 0 | 1,371293    | 0,62  | 0,08  | 0 | Astrocytes | Phkg1    |
| 0 | 1,363437786 | 0,61  | 0,05  | 0 | Astrocytes | Ndrp2    |
| 0 | 1,359818679 | 0,798 | 0,367 | 0 | Astrocytes | Nckap5   |
| 0 | 1,357958887 | 0,765 | 0,15  | 0 | Astrocytes | Sox6     |
| 0 | 1,327130993 | 0,529 | 0,03  | 0 | Astrocytes | Gja1     |
| 0 | 1,325099359 | 0,589 | 0,057 | 0 | Astrocytes | Ntsr2    |
| 0 | 1,317668507 | 0,675 | 0,177 | 0 | Astrocytes | Appl2    |
| 0 | 1,317614952 | 0,671 | 0,244 | 0 | Astrocytes | Ckb      |
| 0 | 1,317254289 | 0,982 | 0,758 | 0 | Astrocytes | Gnao1    |
| 0 | 1,301553155 | 0,573 | 0,044 | 0 | Astrocytes | Slco1c1  |
| 0 | 1,290648626 | 0,999 | 0,942 | 0 | Astrocytes | B3galt1  |
| 0 | 1,281670846 | 0,994 | 0,864 | 0 | Astrocytes | Gpm6b    |
| 0 | 1,281188278 | 0,775 | 0,429 | 0 | Astrocytes | Arhgap5  |
| 0 | 1,252902351 | 0,936 | 0,46  | 0 | Astrocytes | Trps1    |
| 0 | 1,238590116 | 0,712 | 0,29  | 0 | Astrocytes | Cmss1    |
| 0 | 1,229745606 | 0,648 | 0,162 | 0 | Astrocytes | Rmst     |
| 0 | 1,22593624  | 0,572 | 0,089 | 0 | Astrocytes | Glul     |
| 0 | 1,206844723 | 0,998 | 0,93  | 0 | Astrocytes | Pbx1     |
| 0 | 1,173063079 | 0,692 | 0,332 | 0 | Astrocytes | Tyh1     |
| 0 | 1,172592387 | 0,512 | 0,037 | 0 | Astrocytes | Slc39a12 |
| 0 | 1,169427452 | 0,731 | 0,335 | 0 | Astrocytes | Ptn      |
| 0 | 1,168922501 | 0,508 | 0,037 | 0 | Astrocytes | F3       |
| 0 | 1,167298249 | 0,632 | 0,24  | 0 | Astrocytes | Glud1    |
| 0 | 1,156665639 | 0,769 | 0,427 | 0 | Astrocytes | Myo6     |
| 0 | 1,138603304 | 0,993 | 0,854 | 0 | Astrocytes | Dgkb     |

|   |             |       |       |   |            |               |
|---|-------------|-------|-------|---|------------|---------------|
| 0 | 1,129953013 | 0,589 | 0,163 | 0 | Astrocytes | Arhgef26      |
| 0 | 1,12876213  | 0,517 | 0,12  | 0 | Astrocytes | Tprkb         |
| 0 | 1,119340199 | 0,6   | 0,123 | 0 | Astrocytes | Hepacam       |
| 0 | 1,108479636 | 0,688 | 0,413 | 0 | Astrocytes | Ddhd1         |
| 0 | 1,095707192 | 0,516 | 0,05  | 0 | Astrocytes | Prdm16        |
| 0 | 1,093421877 | 0,707 | 0,428 | 0 | Astrocytes | Adk           |
| 0 | 1,080116946 | 0,533 | 0,113 | 0 | Astrocytes | Prdx6         |
| 0 | 1,071682627 | 0,986 | 0,529 | 0 | Astrocytes | Qk            |
| 0 | 1,068667516 | 0,719 | 0,442 | 0 | Astrocytes | Gm35188       |
| 0 | 1,059042938 | 0,586 | 0,147 | 0 | Astrocytes | Daam2         |
| 0 | 1,051979954 | 0,956 | 0,52  | 0 | Astrocytes | Maml2         |
| 0 | 1,049778913 | 0,958 | 0,769 | 0 | Astrocytes | Fmn2          |
| 0 | 1,039804921 | 0,996 | 0,926 | 0 | Astrocytes | Syne1         |
| 0 | 1,016433445 | 0,559 | 0,169 | 0 | Astrocytes | Pard3b        |
| 0 | 1,015889769 | 0,906 | 0,619 | 0 | Astrocytes | Zeb1          |
| 0 | 1,014534422 | 0,524 | 0,125 | 0 | Astrocytes | Myo10         |
| 0 | 1,012702279 | 0,546 | 0,177 | 0 | Astrocytes | Slc27a1       |
| 0 | 1,000841475 | 0,844 | 0,38  | 0 | Astrocytes | Gpc6          |
| 0 | 0,999864716 | 0,962 | 0,745 | 0 | Astrocytes | Stox2         |
| 0 | 0,967075127 | 0,987 | 0,874 | 0 | Astrocytes | Gpm6a         |
| 0 | 0,964975352 | 0,678 | 0,491 | 0 | Astrocytes | Cpeb4         |
| 0 | 0,964789176 | 0,624 | 0,207 | 0 | Astrocytes | Dock1         |
| 0 | 0,939447803 | 0,998 | 0,948 | 0 | Astrocytes | Tnik          |
| 0 | 0,934957136 | 0,687 | 0,364 | 0 | Astrocytes | Prkd1         |
| 0 | 0,932141712 | 0,999 | 0,977 | 0 | Astrocytes | Frm4a         |
| 0 | 0,925579878 | 0,602 | 0,301 | 0 | Astrocytes | Csgalnact1    |
| 0 | 0,914316444 | 0,513 | 0,19  | 0 | Astrocytes | Ugp2          |
| 0 | 0,887490274 | 0,579 | 0,35  | 0 | Astrocytes | Camk2g        |
| 0 | 0,885764033 | 0,611 | 0,297 | 0 | Astrocytes | Clmn          |
| 0 | 0,882248159 | 0,535 | 0,178 | 0 | Astrocytes | Slc6a1        |
| 0 | 0,878638212 | 0,539 | 0,249 | 0 | Astrocytes | Mmd2          |
| 0 | 0,876305968 | 0,991 | 0,795 | 0 | Astrocytes | Zbtb20        |
| 0 | 0,872444478 | 0,531 | 0,278 | 0 | Astrocytes | Vcl           |
| 0 | 0,865435218 | 0,638 | 0,47  | 0 | Astrocytes | Ahcyl1        |
| 0 | 0,863321009 | 0,823 | 0,62  | 0 | Astrocytes | Arhgef12      |
| 0 | 0,862669147 | 0,55  | 0,272 | 0 | Astrocytes | Pygb          |
| 0 | 0,859702162 | 0,535 | 0,289 | 0 | Astrocytes | Arhgef4       |
| 0 | 0,843615577 | 0,973 | 0,701 | 0 | Astrocytes | Pcdh7         |
| 0 | 0,824104188 | 0,568 | 0,382 | 0 | Astrocytes | Mgll          |
| 0 | 0,818132923 | 0,988 | 0,871 | 0 | Astrocytes | Ntrk2         |
| 0 | 0,816430101 | 0,953 | 0,766 | 0 | Astrocytes | Hnrpa2b1      |
| 0 | 0,811757579 | 0,951 | 0,796 | 0 | Astrocytes | C130071C03Rik |
| 0 | 0,80910836  | 0,994 | 0,908 | 0 | Astrocytes | Cadm1         |

|   |             |       |       |   |            |               |
|---|-------------|-------|-------|---|------------|---------------|
| 0 | 0,808891267 | 0,999 | 0,988 | 0 | Astrocytes | Mdga2         |
| 0 | 0,808351986 | 0,593 | 0,358 | 0 | Astrocytes | Cdk8          |
| 0 | 0,792107349 | 0,975 | 0,654 | 0 | Astrocytes | Trpm3         |
| 0 | 0,791219566 | 0,641 | 0,333 | 0 | Astrocytes | Cdh20         |
| 0 | 0,790717857 | 0,594 | 0,408 | 0 | Astrocytes | Add3          |
| 0 | 0,783525764 | 0,518 | 0,256 | 0 | Astrocytes | Psap          |
| 0 | 0,767123759 | 0,617 | 0,479 | 0 | Astrocytes | Mgat5         |
| 0 | 0,763302203 | 0,999 | 0,963 | 0 | Astrocytes | Dclk1         |
| 0 | 0,753491507 | 0,552 | 0,332 | 0 | Astrocytes | Eps15         |
| 0 | 0,745620257 | 0,522 | 0,322 | 0 | Astrocytes | Cep85l        |
| 0 | 0,74268738  | 0,985 | 0,884 | 0 | Astrocytes | 4930402H24Rik |
| 0 | 0,735038099 | 0,623 | 0,416 | 0 | Astrocytes | Tle4          |
| 0 | 0,731512347 | 0,969 | 0,831 | 0 | Astrocytes | Hivep3        |
| 0 | 0,731020229 | 0,986 | 0,906 | 0 | Astrocytes | Dennd1a       |
| 0 | 0,729858083 | 0,547 | 0,224 | 0 | Astrocytes | Plekhg1       |
| 0 | 0,727285452 | 0,526 | 0,335 | 0 | Astrocytes | Acsl6         |
| 0 | 0,723108931 | 0,694 | 0,547 | 0 | Astrocytes | Spire1        |
| 0 | 0,722914885 | 0,981 | 0,758 | 0 | Astrocytes | Grid2         |
| 0 | 0,692647695 | 0,991 | 0,888 | 0 | Astrocytes | Nfib          |
| 0 | 0,683448984 | 0,964 | 0,836 | 0 | Astrocytes | Ncoa1         |
| 0 | 0,673090785 | 0,546 | 0,396 | 0 | Astrocytes | Fermt2        |
| 0 | 0,671381148 | 0,998 | 0,98  | 0 | Astrocytes | Plcb1         |
| 0 | 0,666755033 | 0,969 | 0,834 | 0 | Astrocytes | Spag9         |
| 0 | 0,665128026 | 0,967 | 0,692 | 0 | Astrocytes | Phlpp1        |
| 0 | 0,660306191 | 0,591 | 0,475 | 0 | Astrocytes | Garem1        |
| 0 | 0,658163392 | 0,547 | 0,365 | 0 | Astrocytes | Mapk4         |
| 0 | 0,656621723 | 0,965 | 0,835 | 0 | Astrocytes | Chd9          |
| 0 | 0,653722542 | 0,798 | 0,56  | 0 | Astrocytes | Fut9          |
| 0 | 0,653611719 | 0,99  | 0,82  | 0 | Astrocytes | Ppp2r2b       |
| 0 | 0,647459855 | 0,996 | 0,965 | 0 | Astrocytes | Gphn          |
| 0 | 0,642383637 | 0,954 | 0,703 | 0 | Astrocytes | Cdh10         |
| 0 | 0,638456416 | 0,538 | 0,372 | 0 | Astrocytes | Lpp           |
| 0 | 0,635748294 | 0,973 | 0,852 | 0 | Astrocytes | Trim9         |
| 0 | 0,632809238 | 0,75  | 0,598 | 0 | Astrocytes | Pde8b         |
| 0 | 0,628733844 | 0,5   | 0,291 | 0 | Astrocytes | Stard13       |
| 0 | 0,623431745 | 0,545 | 0,35  | 0 | Astrocytes | Meis2         |
| 0 | 0,619428175 | 0,855 | 0,643 | 0 | Astrocytes | Klf12         |
| 0 | 0,614762231 | 0,903 | 0,662 | 0 | Astrocytes | Kcnn2         |
| 0 | 0,607080108 | 0,622 | 0,452 | 0 | Astrocytes | Arap2         |
| 0 | 0,606479153 | 0,989 | 0,9   | 0 | Astrocytes | Klf1b         |
| 0 | 0,592337461 | 0,665 | 0,558 | 0 | Astrocytes | Phactr3       |
| 0 | 0,590926682 | 0,532 | 0,448 | 0 | Astrocytes | Fam171b       |
| 0 | 0,588615883 | 0,886 | 0,749 | 0 | Astrocytes | Abr           |

|   |             |       |       |   |            |        |
|---|-------------|-------|-------|---|------------|--------|
| 0 | 0,585288055 | 0,599 | 0,294 | 0 | Astrocytes | Glis3  |
| 0 | 0,575856552 | 0,983 | 0,878 | 0 | Astrocytes | Fgfr2  |
| 0 | 0,573022954 | 0,953 | 0,717 | 0 | Astrocytes | Sema6d |
| 0 | 0,569843055 | 0,56  | 0,375 | 0 | Astrocytes | Tmtc2  |
| 0 | 0,569282497 | 0,96  | 0,804 | 0 | Astrocytes | Adcy2  |
| 0 | 0,550005697 | 0,811 | 0,578 | 0 | Astrocytes | Xylt1  |
| 0 | 0,547754552 | 0,505 | 0,417 | 0 | Astrocytes | Pou2f1 |
| 0 | 0,538323605 | 0,871 | 0,734 | 0 | Astrocytes | Kmt2c  |
| 0 | 0,532148583 | 0,938 | 0,665 | 0 | Astrocytes | Fnbp1  |
| 0 | 0,525369557 | 0,955 | 0,836 | 0 | Astrocytes | Sorbs1 |
| 0 | 0,518084526 | 0,915 | 0,778 | 0 | Astrocytes | Phf21a |
| 0 | 0,516153201 | 0,836 | 0,544 | 0 | Astrocytes | Sox5   |
| 0 | 0,503543707 | 0,654 | 0,576 | 0 | Astrocytes | Itsn1  |
| 0 | 0,503299502 | 0,966 | 0,86  | 0 | Astrocytes | Apc    |

|   |             |       |       |   |             |          |
|---|-------------|-------|-------|---|-------------|----------|
| 0 | 4,457513133 | 0,994 | 0,517 | 0 | Endothelial | Gm42418  |
| 0 | 4,345415464 | 0,99  | 0,008 | 0 | Endothelial | Flt1     |
| 0 | 3,816933527 | 0,857 | 0,018 | 0 | Endothelial | Bsg      |
| 0 | 3,61962414  | 0,969 | 0,009 | 0 | Endothelial | Slco1a4  |
| 0 | 3,368482811 | 0,933 | 0,321 | 0 | Endothelial | Cmss1    |
| 0 | 3,338833031 | 0,716 | 0,004 | 0 | Endothelial | Rgs5     |
| 0 | 3,296079476 | 0,833 | 0,002 | 0 | Endothelial | Cldn5    |
| 0 | 3,148259037 | 0,861 | 0,09  | 0 | Endothelial | AY036118 |
| 0 | 3,040749438 | 0,934 | 0,027 | 0 | Endothelial | Ebf1     |
| 0 | 2,952836094 | 0,921 | 0,01  | 0 | Endothelial | Mecom    |
| 0 | 2,894517512 | 0,674 | 0,01  | 0 | Endothelial | Cxcl12   |
| 0 | 2,811212958 | 0,894 | 0,015 | 0 | Endothelial | Ptprb    |
| 0 | 2,782458732 | 0,839 | 0,017 | 0 | Endothelial | Hmcn1    |
| 0 | 2,762096489 | 0,867 | 0,321 | 0 | Endothelial | Spock2   |
| 0 | 2,696057601 | 0,882 | 0,003 | 0 | Endothelial | Adgrl4   |
| 0 | 2,593441723 | 0,775 | 0,034 | 0 | Endothelial | Igfbp7   |
| 0 | 2,583319359 | 0,889 | 0,072 | 0 | Endothelial | Ccdc141  |
| 0 | 2,578129707 | 0,859 | 0,084 | 0 | Endothelial | Slco1c1  |
| 0 | 2,564936686 | 0,977 | 0,592 | 0 | Endothelial | Igf1r    |
| 0 | 2,555934243 | 0,831 | 0,007 | 0 | Endothelial | Pltp     |
| 0 | 2,456026994 | 0,516 | 0,009 | 0 | Endothelial | Vtn      |
| 0 | 2,447129764 | 0,911 | 0,374 | 0 | Endothelial | Cdk8     |
| 0 | 2,429938699 | 0,943 | 0,224 | 0 | Endothelial | Utrn     |
| 0 | 2,421492375 | 0,892 | 0,023 | 0 | Endothelial | Egfl7    |
| 0 | 2,354999037 | 0,866 | 0,027 | 0 | Endothelial | Lef1     |
| 0 | 2,262950975 | 0,946 | 0,519 | 0 | Endothelial | Gpcpd1   |
| 0 | 2,244336253 | 0,713 | 0,048 | 0 | Endothelial | Tmsb4x   |
| 0 | 2,242180502 | 0,942 | 0,244 | 0 | Endothelial | Ptprm    |

|   |             |       |       |   |             |          |
|---|-------------|-------|-------|---|-------------|----------|
| 0 | 2,202917642 | 0,942 | 0,516 | 0 | Endothelial | Sgms1    |
| 0 | 2,135635945 | 0,997 | 0,858 | 0 | Endothelial | Ptprg    |
| 0 | 2,13103492  | 0,801 | 0,004 | 0 | Endothelial | Abcb1a   |
| 0 | 2,100693308 | 0,681 | 0,026 | 0 | Endothelial | Sparc    |
| 0 | 2,099880987 | 0,998 | 0,903 | 0 | Endothelial | Sptbn1   |
| 0 | 2,096628864 | 0,791 | 0,051 | 0 | Endothelial | Slc2a1   |
| 0 | 2,096470152 | 0,795 | 0,041 | 0 | Endothelial | Epas1    |
| 0 | 2,093685494 | 0,79  | 0,003 | 0 | Endothelial | Cyyr1    |
| 0 | 2,00220929  | 0,742 | 0,058 | 0 | Endothelial | Slc7a5   |
| 0 | 1,982523139 | 0,77  | 0,053 | 0 | Endothelial | Atp10a   |
| 0 | 1,978568613 | 0,827 | 0,088 | 0 | Endothelial | Abcg2    |
| 0 | 1,971434702 | 0,767 | 0,004 | 0 | Endothelial | Adgrf5   |
| 0 | 1,96577334  | 0,64  | 0,002 | 0 | Endothelial | Itm2a    |
| 0 | 1,939148602 | 0,708 | 0,064 | 0 | Endothelial | Actb     |
| 0 | 1,9297688   | 0,772 | 0,106 | 0 | Endothelial | Kitl     |
| 0 | 1,897295128 | 0,613 | 0,001 | 0 | Endothelial | Ly6c1    |
| 0 | 1,883322718 | 0,726 | 0,049 | 0 | Endothelial | Sema3c   |
| 0 | 1,861619706 | 0,707 | 0,024 | 0 | Endothelial | Ets1     |
| 0 | 1,849496513 | 0,765 | 0,036 | 0 | Endothelial | Fli1     |
| 0 | 1,839159521 | 0,657 | 0,003 | 0 | Endothelial | Klf2     |
| 0 | 1,824183661 | 0,852 | 0,154 | 0 | Endothelial | Arhgap31 |
| 0 | 1,817807149 | 0,782 | 0,193 | 0 | Endothelial | Slc39a10 |
| 0 | 1,794682641 | 0,88  | 0,386 | 0 | Endothelial | Tmtc2    |
| 0 | 1,790445225 | 0,741 | 0,086 | 0 | Endothelial | Tbc1d4   |
| 0 | 1,789427585 | 0,668 | 0,05  | 0 | Endothelial | Rpl13    |
| 0 | 1,756064497 | 0,671 | 0,037 | 0 | Endothelial | Ubb      |
| 0 | 1,747814585 | 0,7   | 0,028 | 0 | Endothelial | Itga1    |
| 0 | 1,740304184 | 0,754 | 0,163 | 0 | Endothelial | Lars2    |
| 0 | 1,725253318 | 0,78  | 0,093 | 0 | Endothelial | St3gal6  |
| 0 | 1,724528501 | 0,7   | 0,097 | 0 | Endothelial | Jcad     |
| 0 | 1,713049093 | 0,778 | 0,134 | 0 | Endothelial | Heg1     |
| 0 | 1,691875773 | 0,625 | 0,017 | 0 | Endothelial | Ramp2    |
| 0 | 1,669232228 | 0,666 | 0,009 | 0 | Endothelial | Clec2d   |
| 0 | 1,65775646  | 0,61  | 0,015 | 0 | Endothelial | Id1      |
| 0 | 1,650394736 | 0,638 | 0,102 | 0 | Endothelial | Slc7a1   |
| 0 | 1,646938373 | 0,834 | 0,49  | 0 | Endothelial | Slc6a6   |
| 0 | 1,643844894 | 0,874 | 0,513 | 0 | Endothelial | Ablim1   |
| 0 | 1,6318099   | 0,688 | 0,006 | 0 | Endothelial | Nostrin  |
| 0 | 1,630146652 | 0,692 | 0,197 | 0 | Endothelial | Calm1    |
| 0 | 1,619938663 | 0,836 | 0,291 | 0 | Endothelial | Hip1     |
| 0 | 1,606827008 | 0,725 | 0,165 | 0 | Endothelial | Ly6e     |
| 0 | 1,606759927 | 0,6   | 0,039 | 0 | Endothelial | mt-Co1   |
| 0 | 1,603351135 | 0,726 | 0,132 | 0 | Endothelial | Cobl1    |

|   |             |       |       |   |             |               |
|---|-------------|-------|-------|---|-------------|---------------|
| 0 | 1,602275528 | 0,707 | 0,072 | 0 | Endothelial | Arhgap29      |
| 0 | 1,600788264 | 0,758 | 0,215 | 0 | Endothelial | Itm2b         |
| 0 | 1,598793379 | 0,664 | 0,05  | 0 | Endothelial | Apcdd1        |
| 0 | 1,589947452 | 0,754 | 0,252 | 0 | Endothelial | Hsp90ab1      |
| 0 | 1,581591134 | 0,687 | 0,007 | 0 | Endothelial | Pecam1        |
| 0 | 1,581056213 | 0,811 | 0,356 | 0 | Endothelial | Rundc3b       |
| 0 | 1,574584842 | 0,723 | 0,1   | 0 | Endothelial | Tek           |
| 0 | 1,568441773 | 0,685 | 0,011 | 0 | Endothelial | Emcn          |
| 0 | 1,566536649 | 0,661 | 0,014 | 0 | Endothelial | Cgnl1         |
| 0 | 1,56399994  | 0,587 | 0,004 | 0 | Endothelial | Rplp1         |
| 0 | 1,562112915 | 0,668 | 0,144 | 0 | Endothelial | Ptma          |
| 0 | 1,552463033 | 0,622 | 0,009 | 0 | Endothelial | Ahnak         |
| 0 | 1,54380203  | 0,638 | 0,179 | 0 | Endothelial | Tfrc          |
| 0 | 1,531040437 | 0,747 | 0,127 | 0 | Endothelial | Abcc4         |
| 0 | 1,52561409  | 0,663 | 0,042 | 0 | Endothelial | Tns1          |
| 0 | 1,520837685 | 0,682 | 0,078 | 0 | Endothelial | Kank3         |
| 0 | 1,505532713 | 0,661 | 0,148 | 0 | Endothelial | Myf6          |
| 0 | 1,490413262 | 0,666 | 0,006 | 0 | Endothelial | Eng           |
| 0 | 1,461722397 | 0,621 | 0,024 | 0 | Endothelial | Podxl         |
| 0 | 1,458638122 | 0,616 | 0,046 | 0 | Endothelial | Id3           |
| 0 | 1,454173123 | 0,611 | 0,002 | 0 | Endothelial | Zfp366        |
| 0 | 1,449999036 | 0,629 | 0,163 | 0 | Endothelial | Atp1a2        |
| 0 | 1,440783024 | 0,726 | 0,153 | 0 | Endothelial | 9530026P05Rik |
| 0 | 1,435376379 | 0,563 | 0,021 | 0 | Endothelial | Fau           |
| 0 | 1,432856419 | 0,621 | 0,043 | 0 | Endothelial | Fn1           |
| 0 | 1,431252113 | 0,652 | 0,016 | 0 | Endothelial | Rbpms         |
| 0 | 1,430057137 | 0,689 | 0,095 | 0 | Endothelial | Fth1          |
| 0 | 1,417078208 | 0,662 | 0,05  | 0 | Endothelial | Pdgfd         |
| 0 | 1,411358442 | 0,694 | 0,112 | 0 | Endothelial | Dach1         |
| 0 | 1,39162658  | 0,604 | 0,028 | 0 | Endothelial | Slc9a3r2      |
| 0 | 1,364404605 | 0,725 | 0,155 | 0 | Endothelial | Myo10         |
| 0 | 1,359938976 | 0,673 | 0,111 | 0 | Endothelial | Itga6         |
| 0 | 1,357075454 | 0,767 | 0,263 | 0 | Endothelial | Rbms1         |
| 0 | 1,355720711 | 0,507 | 0,001 | 0 | Endothelial | Hspb1         |
| 0 | 1,353201749 | 0,996 | 0,929 | 0 | Endothelial | Fry           |
| 0 | 1,338656286 | 0,659 | 0,19  | 0 | Endothelial | H3f3b         |
| 0 | 1,337064872 | 0,776 | 0,333 | 0 | Endothelial | Col4a3bp      |
| 0 | 1,335312716 | 0,574 | 0,108 | 0 | Endothelial | Rps8          |
| 0 | 1,325016287 | 0,602 | 0,072 | 0 | Endothelial | Rps21         |
| 0 | 1,314390303 | 0,545 | 0,018 | 0 | Endothelial | Nfkbia        |
| 0 | 1,306946816 | 0,6   | 0,017 | 0 | Endothelial | Prom1         |
| 0 | 1,292686867 | 0,735 | 0,27  | 0 | Endothelial | Abhd2         |
| 0 | 1,287367042 | 0,523 | 0,01  | 0 | Endothelial | Rps29         |

|   |             |       |       |   |             |               |
|---|-------------|-------|-------|---|-------------|---------------|
| 0 | 1,286123334 | 0,654 | 0,19  | 0 | Endothelial | Ctnnb1        |
| 0 | 1,279820276 | 0,535 | 0,012 | 0 | Endothelial | Rpl8          |
| 0 | 1,274405782 | 0,574 | 0,056 | 0 | Endothelial | Hspa8         |
| 0 | 1,272734349 | 0,614 | 0,02  | 0 | Endothelial | Prkch         |
| 0 | 1,271261711 | 0,757 | 0,272 | 0 | Endothelial | Sparcl1       |
| 0 | 1,264044275 | 0,533 | 0,018 | 0 | Endothelial | mt-Co3        |
| 0 | 1,262375908 | 0,538 | 0,015 | 0 | Endothelial | Tpt1          |
| 0 | 1,256504852 | 0,619 | 0,131 | 0 | Endothelial | Ltbp4         |
| 0 | 1,253684819 | 0,747 | 0,263 | 0 | Endothelial | 4931406P16Rik |
| 0 | 1,251799397 | 0,995 | 0,888 | 0 | Endothelial | Tjp1          |
| 0 | 1,250079941 | 0,581 | 0,008 | 0 | Endothelial | Erg           |
| 0 | 1,247463461 | 0,587 | 0,131 | 0 | Endothelial | Ppia          |
| 0 | 1,244673464 | 0,565 | 0,107 | 0 | Endothelial | Car4          |
| 0 | 1,241910136 | 0,648 | 0,228 | 0 | Endothelial | Col4a1        |
| 0 | 1,234279613 | 0,624 | 0,104 | 0 | Endothelial | St8sia4       |
| 0 | 1,229328715 | 0,543 | 0,009 | 0 | Endothelial | Vwa1          |
| 0 | 1,228980991 | 0,625 | 0,159 | 0 | Endothelial | Eif1          |
| 0 | 1,212779679 | 0,631 | 0,06  | 0 | Endothelial | Rasgrp3       |
| 0 | 1,206232524 | 0,526 | 0,021 | 0 | Endothelial | Itih5         |
| 0 | 1,203919166 | 0,574 | 0,069 | 0 | Endothelial | Pdgfb         |
| 0 | 1,200767981 | 0,608 | 0,062 | 0 | Endothelial | Wwtr1         |
| 0 | 1,171694986 | 0,511 | 0,003 | 0 | Endothelial | Kdr           |
| 0 | 1,171242817 | 0,577 | 0,01  | 0 | Endothelial | Fgd5          |
| 0 | 1,170023203 | 0,53  | 0,024 | 0 | Endothelial | H2-D1         |
| 0 | 1,168179012 | 0,53  | 0,021 | 0 | Endothelial | Actg1         |
| 0 | 1,16600751  | 0,734 | 0,146 | 0 | Endothelial | Cst3          |
| 0 | 1,161939094 | 0,535 | 0,039 | 0 | Endothelial | Crip2         |
| 0 | 1,161077064 | 0,621 | 0,211 | 0 | Endothelial | Eef1a1        |
| 0 | 1,160765728 | 0,553 | 0,002 | 0 | Endothelial | Esam          |
| 0 | 1,15083757  | 0,594 | 0,09  | 0 | Endothelial | Eogt          |
| 0 | 1,148050331 | 0,624 | 0,189 | 0 | Endothelial | H3f3a         |
| 0 | 1,147722681 | 0,505 | 0,02  | 0 | Endothelial | Rpl38         |
| 0 | 1,146788767 | 0,546 | 0,047 | 0 | Endothelial | Dock6         |
| 0 | 1,143711576 | 0,558 | 0,056 | 0 | Endothelial | Ubc           |
| 0 | 1,139079734 | 0,713 | 0,232 | 0 | Endothelial | Sema6a        |
| 0 | 1,137921936 | 0,534 | 0,005 | 0 | Endothelial | Paqr5         |
| 0 | 1,137454949 | 0,633 | 0,115 | 0 | Endothelial | Clic4         |
| 0 | 1,130499079 | 0,664 | 0,235 | 0 | Endothelial | Extl3         |
| 0 | 1,129224778 | 0,552 | 0,015 | 0 | Endothelial | Fzd6          |
| 0 | 1,1252742   | 0,626 | 0,21  | 0 | Endothelial | Palmd         |
| 0 | 1,117724328 | 0,551 | 0,007 | 0 | Endothelial | Adgre5        |
| 0 | 1,112649811 | 0,573 | 0,078 | 0 | Endothelial | Mtus1         |
| 0 | 1,11223495  | 0,616 | 0,137 | 0 | Endothelial | Polk          |

|           |             |       |       |           |             |         |
|-----------|-------------|-------|-------|-----------|-------------|---------|
| 0         | 1,096086742 | 0,563 | 0,129 | 0         | Endothelial | Rpl27a  |
| 0         | 1,074426937 | 0,571 | 0,116 | 0         | Endothelial | Myo1b   |
| 0         | 1,07351741  | 0,51  | 0,051 | 0         | Endothelial | Rpl41   |
| 0         | 1,070560365 | 0,507 | 0,006 | 0         | Endothelial | Slc22a8 |
| 0         | 1,065331669 | 0,523 | 0,019 | 0         | Endothelial | Hspa12b |
| 0         | 1,059113357 | 0,529 | 0,095 | 0         | Endothelial | Rpl37a  |
| 0         | 1,056464423 | 0,588 | 0,111 | 0         | Endothelial | Elk3    |
| 0         | 1,05417015  | 0,551 | 0,094 | 0         | Endothelial | Arl4a   |
| 0         | 1,049811838 | 0,512 | 0,024 | 0         | Endothelial | Rps14   |
| 0         | 1,049695812 | 0,505 | 0,028 | 0         | Endothelial | Rpl18   |
| 0         | 1,048396079 | 0,624 | 0,131 | 0         | Endothelial | Cd81    |
| 0         | 1,040769097 | 0,503 | 0,003 | 0         | Endothelial | Cdh5    |
| 0         | 1,037240498 | 0,564 | 0,061 | 0         | Endothelial | Afap111 |
| 0         | 1,018249973 | 0,518 | 0,071 | 0         | Endothelial | Gnai2   |
| 0         | 1,017034603 | 0,535 | 0,062 | 0         | Endothelial | Parvb   |
| 0         | 1,003033562 | 0,535 | 0,089 | 0         | Endothelial | Mt1     |
| 0         | 0,99912615  | 0,59  | 0,177 | 0         | Endothelial | Serinc3 |
| 0         | 0,991609714 | 0,562 | 0,103 | 0         | Endothelial | Itpkb   |
| 0         | 0,989520559 | 0,53  | 0,045 | 0         | Endothelial | Tgfbr2  |
| 0         | 0,979132935 | 0,622 | 0,184 | 0         | Endothelial | Mpzl1   |
| 0         | 0,975096067 | 0,563 | 0,094 | 0         | Endothelial | Nxn     |
| 0         | 0,972519224 | 0,515 | 0,075 | 0         | Endothelial | Nxpe2   |
| 0         | 0,971420466 | 0,519 | 0,05  | 0         | Endothelial | Ocln    |
| 0         | 0,946000339 | 0,581 | 0,141 | 0         | Endothelial | Ctnna1  |
| 0         | 0,942906516 | 0,504 | 0,064 | 0         | Endothelial | Tuba1a  |
| 0         | 0,934821965 | 0,528 | 0,067 | 0         | Endothelial | Rgs12   |
| 0         | 0,933335169 | 0,538 | 0,107 | 0         | Endothelial | Sema7a  |
| 0         | 0,927210464 | 0,754 | 0,177 | 0         | Endothelial | ApoE    |
| 0         | 0,927126556 | 0,514 | 0,062 | 0         | Endothelial | S1pr1   |
| 0         | 0,917680451 | 0,507 | 0,053 | 0         | Endothelial | Jam2    |
| 0         | 0,908422052 | 0,502 | 0,054 | 0         | Endothelial | Zfp3611 |
| 0         | 0,900803729 | 0,515 | 0,097 | 0         | Endothelial | Rhobtb1 |
| 0         | 0,875769153 | 0,535 | 0,119 | 0         | Endothelial | Ifnar2  |
| 0         | 0,859950828 | 0,515 | 0,113 | 0         | Endothelial | Maoa    |
| 0         | 0,851450687 | 0,534 | 0,127 | 0         | Endothelial | Ppfibp1 |
| 0         | 0,802633761 | 0,529 | 0,128 | 0         | Endothelial | Myo1e   |
| 7,13E-306 | 0,989074707 | 0,788 | 0,299 | 1,92E-301 | Endothelial | Prex2   |
| 7,32E-306 | 0,89598443  | 0,577 | 0,168 | 1,97E-301 | Endothelial | Wasf2   |
| 7,45E-305 | 0,831856309 | 0,549 | 0,145 | 2,01E-300 | Endothelial | Pdlim5  |
| 1,48E-301 | 1,450257107 | 0,791 | 0,366 | 3,98E-297 | Endothelial | Ptn     |
| 1,60E-300 | 1,128508755 | 0,985 | 0,883 | 4,30E-296 | Endothelial | Foxp1   |
| 3,64E-293 | 1,039050357 | 0,669 | 0,237 | 9,79E-289 | Endothelial | Mcc     |
| 1,59E-288 | 0,982302189 | 0,587 | 0,173 | 4,29E-284 | Endothelial | Chn2    |

|           |             |       |       |           |             |         |
|-----------|-------------|-------|-------|-----------|-------------|---------|
| 3,22E-288 | 0,947674447 | 0,633 | 0,2   | 8,67E-284 | Endothelial | Pard3b  |
| 4,73E-283 | 0,836199482 | 0,638 | 0,189 | 1,27E-278 | Endothelial | Gab1    |
| 2,23E-280 | 1,284775506 | 0,829 | 0,547 | 6,01E-276 | Endothelial | Esyt2   |
| 7,11E-277 | 0,830185545 | 0,525 | 0,154 | 1,92E-272 | Endothelial | Ece1    |
| 1,46E-275 | 1,286381857 | 0,608 | 0,213 | 3,92E-271 | Endothelial | Cald1   |
| 1,38E-273 | 0,996547929 | 0,669 | 0,238 | 3,71E-269 | Endothelial | Plcb4   |
| 3,08E-272 | 1,288926279 | 0,78  | 0,449 | 8,29E-268 | Endothelial | Gnas    |
| 1,99E-270 | 1,095022081 | 0,707 | 0,316 | 5,35E-266 | Endothelial | Nxpe4   |
| 3,07E-267 | 0,810372106 | 0,53  | 0,155 | 8,27E-263 | Endothelial | Golim4  |
| 2,29E-261 | 0,91997154  | 1     | 0,966 | 6,17E-257 | Endothelial | Macf1   |
| 8,31E-259 | 1,150351661 | 0,762 | 0,418 | 2,24E-254 | Endothelial | Bmpr2   |
| 2,86E-258 | 1,006691377 | 0,631 | 0,247 | 7,70E-254 | Endothelial | Dab2ip  |
| 3,65E-255 | 0,918360154 | 0,596 | 0,208 | 9,84E-251 | Endothelial | Ldlrad3 |
| 5,20E-253 | 0,737976636 | 0,511 | 0,144 | 1,40E-248 | Endothelial | Rin2    |
| 8,62E-253 | 0,896675781 | 0,693 | 0,249 | 2,32E-248 | Endothelial | Plekhg1 |
| 3,29E-251 | 1,217731476 | 0,811 | 0,403 | 8,85E-247 | Endothelial | Pitpnc1 |
| 8,67E-244 | 1,073113805 | 0,894 | 0,653 | 2,34E-239 | Endothelial | Apbb2   |
| 1,63E-243 | 0,714864598 | 0,532 | 0,15  | 4,38E-239 | Endothelial | Gatm    |
| 2,62E-243 | 0,907775206 | 0,987 | 0,882 | 7,05E-239 | Endothelial | App     |
| 3,36E-243 | 0,535376563 | 0,745 | 0,244 | 9,06E-239 | Endothelial | Tshz2   |
| 1,93E-237 | 1,161800471 | 0,956 | 0,844 | 5,19E-233 | Endothelial | Camk1d  |
| 4,17E-232 | 1,020671017 | 0,921 | 0,659 | 1,12E-227 | Endothelial | Klf12   |
| 1,96E-224 | 0,694655038 | 0,521 | 0,155 | 5,29E-220 | Endothelial | Itpr2   |
| 1,12E-222 | 0,914840519 | 0,912 | 0,686 | 3,01E-218 | Endothelial | Srgap2  |
| 6,64E-221 | 1,056131672 | 0,722 | 0,399 | 1,79E-216 | Endothelial | Luzp1   |
| 5,95E-220 | 0,739885433 | 0,668 | 0,24  | 1,60E-215 | Endothelial | Dock1   |
| 5,27E-213 | 0,873430575 | 0,572 | 0,222 | 1,42E-208 | Endothelial | Rhoa    |
| 4,09E-210 | 0,959222467 | 0,622 | 0,275 | 1,10E-205 | Endothelial | Myh9    |
| 1,42E-206 | 1,046503567 | 0,711 | 0,386 | 3,83E-202 | Endothelial | Pakap.1 |
| 4,98E-206 | 0,79481536  | 0,514 | 0,183 | 1,34E-201 | Endothelial | Oaz1    |
| 5,35E-203 | 1,593599157 | 0,698 | 0,378 | 1,44E-198 | Endothelial | Dlc1    |
| 5,34E-201 | 0,811854047 | 0,656 | 0,279 | 1,44E-196 | Endothelial | Myo1d   |
| 2,50E-194 | 0,859966315 | 0,612 | 0,247 | 6,73E-190 | Endothelial | Fbxl7   |
| 9,41E-191 | 0,775339031 | 0,56  | 0,225 | 2,54E-186 | Endothelial | Snrk    |
| 1,76E-189 | 0,829343417 | 0,678 | 0,306 | 4,74E-185 | Endothelial | Stard13 |
| 1,03E-183 | 0,804208218 | 0,568 | 0,227 | 2,78E-179 | Endothelial | Adipor2 |
| 1,43E-182 | 1,129877402 | 0,705 | 0,463 | 3,85E-178 | Endothelial | Tsc22d1 |
| 3,51E-181 | 0,916558853 | 0,67  | 0,333 | 9,45E-177 | Endothelial | Efr3b   |
| 7,97E-171 | 0,847710511 | 0,584 | 0,274 | 2,15E-166 | Endothelial | Slc3a2  |
| 8,19E-170 | 0,790732098 | 0,937 | 0,671 | 2,20E-165 | Endothelial | Dnm3    |
| 8,76E-169 | 0,920843478 | 0,708 | 0,419 | 2,36E-164 | Endothelial | Insr    |
| 1,10E-166 | 0,90858262  | 0,849 | 0,659 | 2,98E-162 | Endothelial | Fut8    |
| 1,46E-164 | 0,844700431 | 0,598 | 0,288 | 3,92E-160 | Endothelial | Col4a2  |

|           |             |       |       |           |             |          |
|-----------|-------------|-------|-------|-----------|-------------|----------|
| 1,28E-162 | 0,763216626 | 0,585 | 0,266 | 3,46E-158 | Endothelial | Klf13    |
| 7,88E-158 | 0,780372513 | 0,841 | 0,636 | 2,12E-153 | Endothelial | Arhgef12 |
| 1,09E-156 | 0,806226634 | 0,659 | 0,346 | 2,93E-152 | Endothelial | Akap13   |
| 1,06E-155 | 0,590134858 | 0,868 | 0,576 | 2,86E-151 | Endothelial | Msi2     |
| 2,57E-155 | 0,70171028  | 0,612 | 0,274 | 6,94E-151 | Endothelial | Ttc28    |
| 4,69E-155 | 0,810999999 | 0,58  | 0,28  | 1,26E-150 | Endothelial | Itgb1    |
| 7,05E-154 | 0,810145808 | 0,692 | 0,407 | 1,90E-149 | Endothelial | Fermt2   |
| 1,97E-152 | 0,683230529 | 0,521 | 0,217 | 5,29E-148 | Endothelial | Gpd2     |
| 1,13E-149 | 0,801385201 | 0,534 | 0,239 | 3,06E-145 | Endothelial | Usp53    |
| 2,41E-146 | 0,666628396 | 0,534 | 0,229 | 6,50E-142 | Endothelial | Klh5     |
| 5,49E-144 | 0,765224389 | 0,586 | 0,3   | 1,48E-139 | Endothelial | Sec62    |
| 6,11E-142 | 0,717959655 | 0,575 | 0,283 | 1,65E-137 | Endothelial | lqgap1   |
| 2,03E-135 | 0,711482094 | 0,567 | 0,274 | 5,46E-131 | Endothelial | Bcl2l1   |
| 3,52E-135 | 0,791379975 | 0,785 | 0,572 | 9,48E-131 | Endothelial | Fryl     |
| 9,89E-134 | 0,684060244 | 0,597 | 0,287 | 2,67E-129 | Endothelial | Adgrl2   |
| 1,02E-130 | 0,614481741 | 0,945 | 0,782 | 2,74E-126 | Endothelial | Tcf12    |
| 4,62E-129 | 0,637028904 | 0,512 | 0,229 | 1,24E-124 | Endothelial | Rdx      |
| 1,29E-126 | 0,593659117 | 0,511 | 0,212 | 3,48E-122 | Endothelial | St6gal1  |
| 3,99E-120 | 0,737675544 | 0,672 | 0,424 | 1,08E-115 | Endothelial | Lrch1    |
| 4,12E-120 | 0,631920643 | 0,507 | 0,241 | 1,11E-115 | Endothelial | Ppp1r2   |
| 2,95E-119 | 0,639137508 | 0,511 | 0,245 | 7,93E-115 | Endothelial | Cyth3    |
| 3,73E-119 | 0,720407541 | 0,563 | 0,309 | 1,00E-114 | Endothelial | Cnot6l   |
| 8,65E-119 | 0,661243319 | 0,531 | 0,26  | 2,33E-114 | Endothelial | Wwc2     |
| 2,70E-115 | 0,656826685 | 0,566 | 0,305 | 7,26E-111 | Endothelial | Ywhae    |
| 1,76E-112 | 0,679081312 | 0,704 | 0,483 | 4,75E-108 | Endothelial | Fcho2    |
| 7,51E-110 | 0,578281377 | 0,514 | 0,237 | 2,02E-105 | Endothelial | Mtss1    |
| 2,11E-109 | 0,625618957 | 0,935 | 0,81  | 5,70E-105 | Endothelial | Dock9    |
| 3,67E-107 | 0,665223032 | 0,515 | 0,266 | 9,89E-103 | Endothelial | Elf4g2   |
| 8,12E-107 | 0,715826286 | 0,571 | 0,324 | 2,19E-102 | Endothelial | Lims1    |
| 3,67E-103 | 0,647323719 | 0,503 | 0,257 | 9,89E-99  | Endothelial | Hmgb1    |
| 1,06E-102 | 0,719963297 | 0,671 | 0,465 | 2,85E-98  | Endothelial | Cd2ap    |
| 3,13E-100 | 0,52659661  | 0,54  | 0,277 | 8,42E-96  | Endothelial | Psap     |
| 4,68E-100 | 0,632067664 | 0,931 | 0,856 | 1,26E-95  | Endothelial | Tspan5   |
| 9,47E-100 | 0,624133277 | 0,785 | 0,602 | 2,55E-95  | Endothelial | Map4     |
| 2,60E-99  | 0,554743737 | 0,509 | 0,257 | 7,00E-95  | Endothelial | Git2     |
| 5,05E-99  | 0,66438908  | 0,642 | 0,418 | 1,36E-94  | Endothelial | Nbeal1   |
| 5,78E-99  | 0,666021599 | 0,656 | 0,443 | 1,56E-94  | Endothelial | Kif5b    |
| 3,92E-98  | 0,588955835 | 0,623 | 0,349 | 1,06E-93  | Endothelial | Sash1    |
| 1,96E-97  | 0,67302127  | 0,691 | 0,519 | 5,28E-93  | Endothelial | Pcmt1    |
| 2,15E-97  | 0,630871209 | 0,799 | 0,66  | 5,78E-93  | Endothelial | Mprip    |
| 6,06E-97  | 0,645537239 | 0,513 | 0,277 | 1,63E-92  | Endothelial | Lamc1    |
| 1,32E-95  | 0,603454765 | 0,567 | 0,329 | 3,55E-91  | Endothelial | Adam10   |
| 2,52E-94  | 0,537031264 | 0,932 | 0,839 | 6,79E-90  | Endothelial | Rapgef2  |

|          |             |       |       |          |             |         |
|----------|-------------|-------|-------|----------|-------------|---------|
| 8,31E-94 | 0,56544312  | 0,511 | 0,273 | 2,24E-89 | Endothelial | Snx3    |
| 1,35E-93 | 0,592453657 | 0,537 | 0,297 | 3,63E-89 | Endothelial | Actn4   |
| 2,97E-90 | 0,614824976 | 0,524 | 0,29  | 7,99E-86 | Endothelial | Slc16a2 |
| 2,58E-89 | 0,64484274  | 0,585 | 0,383 | 6,94E-85 | Endothelial | Cdc42   |
| 2,80E-89 | 0,577719324 | 0,554 | 0,302 | 7,55E-85 | Endothelial | Etv6    |
| 6,91E-89 | 0,566713245 | 0,792 | 0,631 | 1,86E-84 | Endothelial | Nedd4   |
| 3,76E-86 | 0,614909744 | 0,634 | 0,422 | 1,01E-81 | Endothelial | Klf7    |
| 4,96E-86 | 0,581903799 | 0,569 | 0,341 | 1,34E-81 | Endothelial | Ctnnd1  |
| 3,24E-85 | 0,590976353 | 0,567 | 0,345 | 8,74E-81 | Endothelial | Agrn    |
| 1,44E-84 | 0,654080456 | 0,545 | 0,34  | 3,88E-80 | Endothelial | Rpl6    |
| 1,97E-84 | 0,601147515 | 0,648 | 0,436 | 5,29E-80 | Endothelial | Susd6   |
| 2,09E-83 | 0,589099954 | 0,71  | 0,502 | 5,62E-79 | Endothelial | Pard3   |
| 2,48E-82 | 0,622694712 | 0,65  | 0,472 | 6,68E-78 | Endothelial | Aplp2   |
| 3,22E-81 | 0,566582956 | 0,524 | 0,307 | 8,68E-77 | Endothelial | Dcx6    |
| 1,05E-80 | 0,601678075 | 0,514 | 0,295 | 2,83E-76 | Endothelial | Pls3    |
| 1,29E-80 | 0,595479508 | 0,6   | 0,391 | 3,48E-76 | Endothelial | Btbd7   |
| 1,23E-78 | 0,586623724 | 0,636 | 0,456 | 3,32E-74 | Endothelial | Gnb1    |
| 1,38E-77 | 0,516239196 | 0,505 | 0,28  | 3,72E-73 | Endothelial | Pak2    |
| 2,45E-75 | 0,550705491 | 0,605 | 0,35  | 6,59E-71 | Endothelial | Pde7b   |
| 2,02E-74 | 0,546453866 | 0,532 | 0,33  | 5,43E-70 | Endothelial | Agfg1   |
| 3,11E-73 | 0,516315419 | 0,722 | 0,577 | 8,38E-69 | Endothelial | Mef2a   |
| 3,43E-72 | 0,542347203 | 0,559 | 0,361 | 9,25E-68 | Endothelial | Znrf1   |
| 9,61E-71 | 0,628867311 | 0,933 | 0,87  | 2,59E-66 | Endothelial | Arl15   |
| 2,81E-68 | 0,521261857 | 0,636 | 0,461 | 7,58E-64 | Endothelial | Mbnl1   |
| 6,90E-66 | 0,511295717 | 0,898 | 0,817 | 1,86E-61 | Endothelial | Rapgef4 |
| 1,81E-64 | 0,520787903 | 0,583 | 0,402 | 4,86E-60 | Endothelial | Hectd1  |
| 6,82E-62 | 0,523404074 | 0,588 | 0,42  | 1,84E-57 | Endothelial | Mcf2l   |
| 1,12E-58 | 0,591060566 | 0,695 | 0,596 | 3,03E-54 | Endothelial | Pten    |
| 4,77E-58 | 0,523919398 | 0,973 | 0,912 | 1,29E-53 | Endothelial | Prkg1   |
| 4,46E-55 | 0,502049119 | 0,818 | 0,705 | 1,20E-50 | Endothelial | Rapgef5 |
| 3,23E-25 | 0,64345728  | 0,642 | 0,611 | 8,69E-21 | Endothelial | Pde8b   |

|   |             |       |       |   |          |          |
|---|-------------|-------|-------|---|----------|----------|
| 0 | 3,34150895  | 0,919 | 0,038 | 0 | Pericyte | Atp13a5  |
| 0 | 2,817512741 | 0,95  | 0,033 | 0 | Pericyte | Ebf1     |
| 0 | 2,427758307 | 0,791 | 0,011 | 0 | Pericyte | Vtn      |
| 0 | 2,378232106 | 0,947 | 0,165 | 0 | Pericyte | Atp1a2   |
| 0 | 2,07512444  | 0,827 | 0,024 | 0 | Pericyte | Slc6a20a |
| 0 | 2,041060437 | 0,911 | 0,215 | 0 | Pericyte | Cald1    |
| 0 | 1,993776024 | 0,864 | 0,049 | 0 | Pericyte | Pdgfrb   |
| 0 | 1,782972588 | 0,799 | 0,089 | 0 | Pericyte | Pice1    |
| 0 | 1,702820571 | 0,724 | 0,033 | 0 | Pericyte | Itga1    |
| 0 | 1,695462494 | 0,713 | 0,033 | 0 | Pericyte | Notch3   |
| 0 | 1,658271359 | 0,699 | 0,011 | 0 | Pericyte | Morrbid  |

|           |             |       |       |           |          |               |
|-----------|-------------|-------|-------|-----------|----------|---------------|
| 0         | 1,631934347 | 0,688 | 0,079 | 0         | Pericyte | Trpc3         |
| 0         | 1,597947081 | 0,677 | 0,041 | 0         | Pericyte | Colec12       |
| 0         | 1,59432469  | 0,682 | 0,01  | 0         | Pericyte | Slc38a11      |
| 0         | 1,594007245 | 0,621 | 0,005 | 0         | Pericyte | Abcc9         |
| 0         | 1,552359485 | 0,694 | 0,005 | 0         | Pericyte | Tbx3os1       |
| 0         | 1,528364797 | 0,682 | 0,056 | 0         | Pericyte | Phldb2        |
| 0         | 1,504515607 | 0,727 | 0,118 | 0         | Pericyte | Myc1b         |
| 0         | 1,502507372 | 0,685 | 0,098 | 0         | Pericyte | Arhgap6       |
| 0         | 1,481957169 | 0,696 | 0,031 | 0         | Pericyte | Adap2         |
| 0         | 1,477374296 | 0,688 | 0,05  | 0         | Pericyte | Dock6         |
| 0         | 1,4758308   | 0,657 | 0,02  | 0         | Pericyte | Rbpms         |
| 0         | 1,450908074 | 0,599 | 0,039 | 0         | Pericyte | Igfbp7        |
| 0         | 1,43849224  | 0,643 | 0,006 | 0         | Pericyte | Carmn         |
| 0         | 1,339064296 | 0,538 | 0,009 | 0         | Pericyte | Rgs5          |
| 0         | 1,178924232 | 0,554 | 0,012 | 0         | Pericyte | Egflam        |
| 0         | 1,073298305 | 0,535 | 0,046 | 0         | Pericyte | Cped1         |
| 8,92E-299 | 1,131210157 | 0,579 | 0,076 | 2,40E-294 | Pericyte | Arhgap29      |
| 2,52E-283 | 1,066394873 | 0,518 | 0,062 | 6,78E-279 | Pericyte | Sntb1         |
| 7,15E-275 | 1,481436164 | 0,733 | 0,142 | 1,93E-270 | Pericyte | Arhgap42      |
| 3,93E-264 | 2,901401637 | 0,978 | 0,379 | 1,06E-259 | Pericyte | Dlc1          |
| 3,04E-222 | 1,628317636 | 0,85  | 0,229 | 8,19E-218 | Pericyte | Utrn          |
| 1,30E-214 | 1,277221258 | 0,674 | 0,136 | 3,50E-210 | Pericyte | Cobll1        |
| 8,30E-211 | 0,936859375 | 0,518 | 0,079 | 2,23E-206 | Pericyte | Ccdc141       |
| 3,86E-195 | 1,362868018 | 0,691 | 0,157 | 1,04E-190 | Pericyte | 9530026P05Rik |
| 4,44E-188 | 1,908743223 | 0,95  | 0,405 | 1,19E-183 | Pericyte | Pitpnc1       |
| 5,10E-170 | 1,927944131 | 0,964 | 0,61  | 1,37E-165 | Pericyte | Pde8b         |
| 3,26E-163 | 1,532354389 | 0,735 | 0,235 | 8,78E-159 | Pericyte | Airn          |
| 4,07E-158 | 1,024744426 | 0,51  | 0,096 | 1,10E-153 | Pericyte | AY036118      |
| 5,66E-157 | 1,723481947 | 0,942 | 0,464 | 1,52E-152 | Pericyte | Plxdc2        |
| 2,67E-150 | 1,213406094 | 0,738 | 0,201 | 7,20E-146 | Pericyte | Lama2         |
| 9,97E-141 | 1,687869267 | 0,992 | 0,651 | 2,69E-136 | Pericyte | Plcl1         |
| 1,99E-140 | 1,016056214 | 0,621 | 0,157 | 5,36E-136 | Pericyte | Itpr2         |
| 6,52E-128 | 1,483782816 | 0,844 | 0,368 | 1,76E-123 | Pericyte | Ptn           |
| 1,11E-119 | 0,983274259 | 0,66  | 0,201 | 2,99E-115 | Pericyte | 04_Sep        |
| 3,93E-119 | 0,904899572 | 0,507 | 0,123 | 1,06E-114 | Pericyte | Svil          |
| 2,39E-111 | 0,852938144 | 0,557 | 0,15  | 6,43E-107 | Pericyte | Eps8          |
| 1,79E-106 | 0,981970187 | 0,632 | 0,192 | 4,83E-102 | Pericyte | Gab1          |
| 4,96E-104 | 1,100700567 | 0,607 | 0,203 | 1,34E-99  | Pericyte | Lhfp          |
| 6,59E-101 | 1,126590304 | 0,682 | 0,266 | 1,78E-96  | Pericyte | Rbms1         |
| 1,82E-99  | 1,238610095 | 0,953 | 0,562 | 4,90E-95  | Pericyte | Grm3          |
| 2,52E-99  | 0,837291208 | 0,571 | 0,169 | 6,79E-95  | Pericyte | Epb4112       |
| 3,01E-95  | 1,284508102 | 0,933 | 0,52  | 8,10E-91  | Pericyte | Gm42418       |
| 5,50E-90  | 1,091218939 | 0,975 | 0,667 | 1,48E-85  | Pericyte | Ptprk         |

|          |             |       |       |          |          |               |
|----------|-------------|-------|-------|----------|----------|---------------|
| 9,34E-90 | 0,958818066 | 0,596 | 0,203 | 2,52E-85 | Pericyte | Pard3b        |
| 2,67E-89 | 1,132481738 | 0,805 | 0,402 | 7,20E-85 | Pericyte | Inpp4b        |
| 4,09E-89 | 1,046996291 | 0,747 | 0,326 | 1,10E-84 | Pericyte | Cmss1         |
| 9,91E-83 | 0,995734432 | 0,864 | 0,596 | 2,67E-78 | Pericyte | Pten          |
| 9,25E-82 | 0,971517575 | 0,903 | 0,654 | 2,49E-77 | Pericyte | Apbb2         |
| 3,49E-81 | 0,780008414 | 1     | 1     | 9,39E-77 | Pericyte | Malat1        |
| 2,72E-80 | 0,880379934 | 0,727 | 0,311 | 7,31E-76 | Pericyte | Rbms3         |
| 1,55E-79 | 0,905859076 | 0,992 | 0,863 | 4,17E-75 | Pericyte | Mast4         |
| 5,98E-79 | 1,085698794 | 0,986 | 0,929 | 1,61E-74 | Pericyte | Fry           |
| 4,45E-77 | 1,183280109 | 0,836 | 0,42  | 1,20E-72 | Pericyte | Gpc6          |
| 3,55E-72 | 0,990930857 | 0,616 | 0,278 | 9,57E-68 | Pericyte | Lamc1         |
| 4,45E-69 | 1,285148113 | 0,986 | 0,912 | 1,20E-64 | Pericyte | Prkg1         |
| 9,19E-68 | 0,90072087  | 0,969 | 0,768 | 2,47E-63 | Pericyte | Diaph2        |
| 1,06E-65 | 0,920419481 | 0,646 | 0,325 | 2,87E-61 | Pericyte | Lims1         |
| 1,92E-63 | 0,837288832 | 0,994 | 0,916 | 5,16E-59 | Pericyte | Rora          |
| 2,28E-63 | 0,827150202 | 0,936 | 0,557 | 6,15E-59 | Pericyte | Maml2         |
| 2,69E-62 | 0,843371175 | 0,577 | 0,258 | 7,24E-58 | Pericyte | St5           |
| 4,84E-62 | 1,082366458 | 0,908 | 0,705 | 1,31E-57 | Pericyte | Rapgef5       |
| 4,51E-57 | 0,648176172 | 0,507 | 0,185 | 1,21E-52 | Pericyte | Daam2         |
| 4,92E-56 | 0,696988889 | 0,978 | 0,903 | 1,33E-51 | Pericyte | Sptbn1        |
| 2,06E-55 | 0,841295622 | 0,627 | 0,315 | 5,55E-51 | Pericyte | Slc12a2       |
| 2,68E-51 | 0,79764528  | 0,889 | 0,644 | 7,23E-47 | Pericyte | Zeb1          |
| 1,42E-48 | 0,738769569 | 0,805 | 0,607 | 3,83E-44 | Pericyte | Zfand3        |
| 1,86E-48 | 0,820163336 | 0,696 | 0,393 | 5,02E-44 | Pericyte | Pdzd2         |
| 2,39E-47 | 0,830774733 | 0,657 | 0,403 | 6,43E-43 | Pericyte | Ctdspl        |
| 7,72E-45 | 0,802417709 | 0,532 | 0,275 | 2,08E-40 | Pericyte | Gucy1b1       |
| 8,41E-43 | 0,597862254 | 0,978 | 0,728 | 2,27E-38 | Pericyte | Nfia          |
| 3,41E-42 | 0,63780066  | 0,872 | 0,569 | 9,18E-38 | Pericyte | Sox5          |
| 2,78E-41 | 0,827074321 | 0,733 | 0,496 | 7,48E-37 | Pericyte | Pid1          |
| 9,21E-41 | 0,644688349 | 0,744 | 0,481 | 2,48E-36 | Pericyte | 07. Sep       |
| 1,94E-40 | 0,680481426 | 0,585 | 0,309 | 5,24E-36 | Pericyte | Stard13       |
| 3,01E-40 | 0,700422542 | 0,524 | 0,278 | 8,10E-36 | Pericyte | Myh9          |
| 7,24E-38 | 0,646506641 | 0,955 | 0,884 | 1,95E-33 | Pericyte | Foxp1         |
| 3,44E-34 | 0,622518769 | 0,677 | 0,442 | 9,27E-30 | Pericyte | Farp1         |
| 5,18E-34 | 0,70658948  | 0,501 | 0,27  | 1,40E-29 | Pericyte | E130308A19Rik |
| 4,95E-33 | 0,508723258 | 0,992 | 0,894 | 1,33E-28 | Pericyte | Ddx5          |
| 1,58E-32 | 0,667507712 | 0,696 | 0,504 | 4,27E-28 | Pericyte | Pard3         |
| 1,64E-32 | 0,534248681 | 0,95  | 0,783 | 4,42E-28 | Pericyte | Tcf12         |
| 4,66E-32 | 0,715374517 | 0,568 | 0,36  | 1,26E-27 | Pericyte | 11. Sep       |
| 4,71E-32 | 0,514592066 | 0,989 | 0,812 | 1,27E-27 | Pericyte | Zbtb20        |
| 1,93E-31 | 0,622255201 | 0,593 | 0,388 | 5,19E-27 | Pericyte | Pakap.1       |
| 2,38E-30 | 0,680551166 | 0,63  | 0,437 | 6,42E-26 | Pericyte | Slco3a1       |
| 5,38E-30 | 0,731005496 | 0,596 | 0,378 | 1,45E-25 | Pericyte | Cdk8          |

|          |             |       |       |          |          |         |
|----------|-------------|-------|-------|----------|----------|---------|
| 2,22E-29 | 0,554585564 | 0,816 | 0,66  | 5,98E-25 | Pericyte | Mprip   |
| 1,40E-28 | 0,512965291 | 0,891 | 0,709 | 3,78E-24 | Pericyte | Specc1  |
| 3,22E-28 | 0,610932113 | 0,616 | 0,419 | 8,66E-24 | Pericyte | Nbeal1  |
| 5,01E-26 | 0,555378472 | 0,721 | 0,555 | 1,35E-21 | Pericyte | Dleu2   |
| 1,74E-25 | 0,531275618 | 0,535 | 0,322 | 4,69E-21 | Pericyte | Pik3r1  |
| 6,93E-24 | 0,50330144  | 0,596 | 0,362 | 1,87E-19 | Pericyte | Rgs6    |
| 1,26E-23 | 0,586273476 | 0,501 | 0,292 | 3,39E-19 | Pericyte | Ror1    |
| 4,52E-23 | 0,595470571 | 0,588 | 0,42  | 1,22E-18 | Pericyte | Carmil1 |
| 9,23E-23 | 0,543331734 | 0,513 | 0,322 | 2,49E-18 | Pericyte | Tbc1d1  |
| 7,36E-21 | 0,555548509 | 0,649 | 0,516 | 1,98E-16 | Pericyte | Daam1   |
| 2,20E-20 | 0,558761024 | 0,54  | 0,352 | 5,93E-16 | Pericyte | Pde7b   |
| 3,77E-19 | 0,545295136 | 0,538 | 0,387 | 1,01E-14 | Pericyte | Lpp     |
| 1,31E-17 | 0,598374213 | 0,585 | 0,492 | 3,53E-13 | Pericyte | Gmnds   |
| 3,80E-17 | 0,517962601 | 0,822 | 0,718 | 1,02E-12 | Pericyte | Gucy1a2 |
| 1,16E-15 | 0,522330841 | 0,568 | 0,452 | 3,13E-11 | Pericyte | Adk     |

|   |             |       |       |   |           |         |
|---|-------------|-------|-------|---|-----------|---------|
| 0 | 5,286265831 | 0,906 | 0,128 | 0 | ependymal | Htr2c   |
| 0 | 4,535243571 | 0,908 | 0,012 | 0 | ependymal | Ttr     |
| 0 | 4,002256355 | 0,918 | 0,261 | 0 | ependymal | Enpp2   |
| 0 | 3,908045903 | 0,98  | 0,681 | 0 | ependymal | Trpm3   |
| 0 | 3,253031525 | 0,903 | 0,009 | 0 | ependymal | Otx2os1 |
| 0 | 2,892439216 | 0,952 | 0,018 | 0 | ependymal | Spag16  |
| 0 | 2,843325012 | 0,887 | 0,061 | 0 | ependymal | Sulf1   |
| 0 | 2,78498615  | 0,934 | 0,516 | 0 | ependymal | Stk39   |
| 0 | 2,662451527 | 0,851 | 0,018 | 0 | ependymal | Gmnc    |
| 0 | 2,399553552 | 0,852 | 0,068 | 0 | ependymal | Vat11   |
| 0 | 2,389536554 | 0,854 | 0,018 | 0 | ependymal | Rbm47   |
| 0 | 2,351219265 | 0,818 | 0,019 | 0 | ependymal | Col8a1  |
| 0 | 2,338227877 | 0,869 | 0,042 | 0 | ependymal | Col9a3  |
| 0 | 2,281112205 | 0,939 | 0,387 | 0 | ependymal | Esrrg   |
| 0 | 2,206796868 | 0,925 | 0,455 | 0 | ependymal | Sh3d19  |
| 0 | 2,1759452   | 0,894 | 0,086 | 0 | ependymal | Prdm16  |
| 0 | 2,098491526 | 0,786 | 0,04  | 0 | ependymal | Prir    |
| 0 | 2,065144043 | 0,887 | 0,093 | 0 | ependymal | Lrriq1  |
| 0 | 2,040549759 | 0,868 | 0,248 | 0 | ependymal | Fras1   |
| 0 | 2,009325024 | 0,831 | 0,002 | 0 | ependymal | Tmem72  |
| 0 | 1,986233257 | 0,859 | 0,322 | 0 | ependymal | Nhsl2   |
| 0 | 1,948046135 | 0,925 | 0,305 | 0 | ependymal | Stard13 |
| 0 | 1,832166383 | 0,869 | 0,254 | 0 | ependymal | Cab39l  |
| 0 | 1,802235293 | 0,844 | 0,203 | 0 | ependymal | Tbc1d9  |
| 0 | 1,718514907 | 0,782 | 0,012 | 0 | ependymal | Dnah6   |
| 0 | 1,693541706 | 0,845 | 0,288 | 0 | ependymal | Slc16a2 |
| 0 | 1,683916047 | 0,811 | 0,063 | 0 | ependymal | Spef2   |

|   |             |       |       |   |           |          |
|---|-------------|-------|-------|---|-----------|----------|
| 0 | 1,678838815 | 0,869 | 0,131 | 0 | ependymal | Gm4876   |
| 0 | 1,653393289 | 0,749 | 0,006 | 0 | ependymal | Clic6    |
| 0 | 1,639355104 | 0,697 | 0,014 | 0 | ependymal | Mecom    |
| 0 | 1,594819765 | 0,738 | 0,035 | 0 | ependymal | Kl       |
| 0 | 1,575571538 | 0,769 | 0,089 | 0 | ependymal | Cfap44   |
| 0 | 1,572768312 | 0,839 | 0,34  | 0 | ependymal | Atp2b3   |
| 0 | 1,569403277 | 0,759 | 0,029 | 0 | ependymal | Frem1    |
| 0 | 1,557585664 | 0,832 | 0,184 | 0 | ependymal | Cfap69   |
| 0 | 1,546519668 | 0,754 | 0,004 | 0 | ependymal | Drc7     |
| 0 | 1,542527834 | 0,703 | 0,081 | 0 | ependymal | Strip2   |
| 0 | 1,53068582  | 0,83  | 0,093 | 0 | ependymal | Nxn      |
| 0 | 1,526872905 | 0,989 | 0,576 | 0 | ependymal | Msi2     |
| 0 | 1,509146908 | 0,792 | 0,06  | 0 | ependymal | Dnah7b   |
| 0 | 1,505908043 | 0,931 | 0,317 | 0 | ependymal | Glis3    |
| 0 | 1,505191181 | 0,731 | 0,051 | 0 | ependymal | Pdgfd    |
| 0 | 1,497900912 | 0,776 | 0,134 | 0 | ependymal | Mid1     |
| 0 | 1,493461837 | 0,792 | 0,165 | 0 | ependymal | Car12    |
| 0 | 1,461285988 | 0,785 | 0,062 | 0 | ependymal | Shroom3  |
| 0 | 1,457705758 | 0,806 | 0,163 | 0 | ependymal | Wdr78    |
| 0 | 1,453222099 | 0,776 | 0,209 | 0 | ependymal | L3mbtl3  |
| 0 | 1,453052386 | 0,766 | 0,051 | 0 | ependymal | Adgrv1   |
| 0 | 1,448629232 | 0,654 | 0,028 | 0 | ependymal | Fap      |
| 0 | 1,434980507 | 0,776 | 0,116 | 0 | ependymal | Notch2   |
| 0 | 1,433290332 | 0,811 | 0,201 | 0 | ependymal | Rmst     |
| 0 | 1,432280289 | 0,725 | 0,051 | 0 | ependymal | Fhad1    |
| 0 | 1,398566171 | 0,765 | 0,075 | 0 | ependymal | Ccdc141  |
| 0 | 1,386768371 | 0,67  | 0,026 | 0 | ependymal | Bmp6     |
| 0 | 1,364442308 | 0,666 | 0,04  | 0 | ependymal | Ccdc162  |
| 0 | 1,354623738 | 0,701 | 0,06  | 0 | ependymal | Sntb1    |
| 0 | 1,32709453  | 0,631 | 0,006 | 0 | ependymal | Dnah11   |
| 0 | 1,292141069 | 0,652 | 0,011 | 0 | ependymal | Gm29266  |
| 0 | 1,272579429 | 0,656 | 0,002 | 0 | ependymal | Slc4a5   |
| 0 | 1,271124381 | 0,724 | 0,013 | 0 | ependymal | Ccdc114  |
| 0 | 1,251899559 | 0,701 | 0,094 | 0 | ependymal | Vwa3a    |
| 0 | 1,241070549 | 0,803 | 0,2   | 0 | ependymal | Pard3b   |
| 0 | 1,237537176 | 0,721 | 0,074 | 0 | ependymal | Slc39a12 |
| 0 | 1,233840417 | 0,638 | 0,064 | 0 | ependymal | Cfap47   |
| 0 | 1,223095253 | 0,746 | 0,116 | 0 | ependymal | Syne2    |
| 0 | 1,201331222 | 0,775 | 0,239 | 0 | ependymal | Ccdc39   |
| 0 | 1,19504849  | 0,566 | 0,023 | 0 | ependymal | Cfap43   |
| 0 | 1,19448444  | 0,677 | 0,064 | 0 | ependymal | Gulp1    |
| 0 | 1,193127521 | 0,721 | 0,112 | 0 | ependymal | Zfp521   |
| 0 | 1,190313094 | 0,625 | 0,002 | 0 | ependymal | Lmx1a    |

|   |             |       |       |   |           |               |
|---|-------------|-------|-------|---|-----------|---------------|
| 0 | 1,186055487 | 0,644 | 0,115 | 0 | ependymal | Spag6l        |
| 0 | 1,181309995 | 0,637 | 0,032 | 0 | ependymal | Baiap21l      |
| 0 | 1,181304913 | 0,79  | 0,168 | 0 | ependymal | Neat1         |
| 0 | 1,167455637 | 0,628 | 0,032 | 0 | ependymal | Cfap65        |
| 0 | 1,159842562 | 0,593 | 0,014 | 0 | ependymal | Ak9           |
| 0 | 1,154850002 | 0,713 | 0,108 | 0 | ependymal | Ppfbp2        |
| 0 | 1,149483607 | 0,607 | 0,011 | 0 | ependymal | Mdfic         |
| 0 | 1,144454223 | 0,606 | 0,016 | 0 | ependymal | Cgnl1         |
| 0 | 1,144204687 | 0,594 | 0,023 | 0 | ependymal | Slc6a20a      |
| 0 | 1,142859143 | 0,63  | 0,002 | 0 | ependymal | Otx2          |
| 0 | 1,1416262   | 0,718 | 0,189 | 0 | ependymal | Phactr2       |
| 0 | 1,139655576 | 0,606 | 0,044 | 0 | ependymal | Kcnj13        |
| 0 | 1,136447002 | 0,638 | 0,001 | 0 | ependymal | Folr1         |
| 0 | 1,132231899 | 0,6   | 0,02  | 0 | ependymal | Abca4         |
| 0 | 1,119480894 | 0,669 | 0,087 | 0 | ependymal | Slco1c1       |
| 0 | 1,112358059 | 0,677 | 0,13  | 0 | ependymal | Armc2         |
| 0 | 1,111825222 | 0,613 | 0,007 | 0 | ependymal | Slc13a4       |
| 0 | 1,104536949 | 0,661 | 0,073 | 0 | ependymal | Psd2          |
| 0 | 1,103628055 | 0,61  | 0,066 | 0 | ependymal | Zbbx          |
| 0 | 1,097087336 | 0,655 | 0,095 | 0 | ependymal | Mpp7          |
| 0 | 1,081574897 | 0,573 | 0,001 | 0 | ependymal | F5            |
| 0 | 1,080414117 | 0,599 | 0,022 | 0 | ependymal | Spata17       |
| 0 | 1,076563802 | 0,599 | 0,024 | 0 | ependymal | Ezr           |
| 0 | 1,070411603 | 0,761 | 0,218 | 0 | ependymal | Clybl         |
| 0 | 1,067481993 | 0,566 | 0,019 | 0 | ependymal | Acss3         |
| 0 | 1,064620287 | 0,601 | 0,065 | 0 | ependymal | Ap1s2         |
| 0 | 1,057306226 | 0,566 | 0,004 | 0 | ependymal | Col4a3        |
| 0 | 1,053435622 | 0,617 | 0,076 | 0 | ependymal | Whrn          |
| 0 | 1,053097674 | 0,632 | 0,15  | 0 | ependymal | Gm26542       |
| 0 | 1,043418565 | 0,589 | 0,034 | 0 | ependymal | Dab2          |
| 0 | 1,037989635 | 0,531 | 0,01  | 0 | ependymal | Oca2          |
| 0 | 1,037180108 | 0,592 | 0,031 | 0 | ependymal | Lef1          |
| 0 | 1,034580884 | 0,642 | 0,106 | 0 | ependymal | Cpq           |
| 0 | 1,0159099   | 0,569 | 0,013 | 0 | ependymal | Col4a4        |
| 0 | 0,995501005 | 0,544 | 0,063 | 0 | ependymal | 4930511M06Rik |
| 0 | 0,994585743 | 0,555 | 0,005 | 0 | ependymal | Trpv4         |
| 0 | 0,986005864 | 0,665 | 0,09  | 0 | ependymal | Cpne2         |
| 0 | 0,97134311  | 0,632 | 0,084 | 0 | ependymal | Prkcq         |
| 0 | 0,966469677 | 0,575 | 0,047 | 0 | ependymal | Iqub          |
| 0 | 0,961413763 | 0,618 | 0,119 | 0 | ependymal | Cfap74        |
| 0 | 0,948297074 | 0,625 | 0,088 | 0 | ependymal | Plce1         |
| 0 | 0,944312089 | 0,52  | 0,024 | 0 | ependymal | 9330185C12Rik |
| 0 | 0,942589748 | 0,604 | 0,104 | 0 | ependymal | Itpkb         |

|           |             |       |       |           |           |               |
|-----------|-------------|-------|-------|-----------|-----------|---------------|
| 0         | 0,936975699 | 0,589 | 0,083 | 0         | ependymal | Kif9          |
| 0         | 0,936427271 | 0,558 | 0,009 | 0         | ependymal | Gm16201       |
| 0         | 0,926175908 | 0,632 | 0,106 | 0         | ependymal | Elovl7        |
| 0         | 0,91746018  | 0,538 | 0,015 | 0         | ependymal | Slco1a4       |
| 0         | 0,895082878 | 0,53  | 0,021 | 0         | ependymal | Rdh5          |
| 0         | 0,885539034 | 0,528 | 0,03  | 0         | ependymal | C330002G04Rik |
| 0         | 0,877331884 | 0,537 | 0,02  | 0         | ependymal | Lrrc23        |
| 0         | 0,876569111 | 0,538 | 0,045 | 0         | ependymal | Slc4a2        |
| 0         | 0,875200845 | 0,532 | 0,077 | 0         | ependymal | Parva         |
| 0         | 0,862636873 | 0,548 | 0,075 | 0         | ependymal | Efcab1        |
| 0         | 0,853780046 | 0,531 | 0,102 | 0         | ependymal | Cui4b         |
| 0         | 0,831732166 | 0,548 | 0,068 | 0         | ependymal | 10. Sep       |
| 0         | 0,829804687 | 0,508 | 0,032 | 0         | ependymal | Bad           |
| 0         | 0,819098157 | 0,503 | 0,047 | 0         | ependymal | Arl6ip1       |
| 0         | 0,8153666   | 0,545 | 0,098 | 0         | ependymal | Arsg          |
| 0         | 0,811138921 | 0,544 | 0,1   | 0         | ependymal | 2810403D21Rik |
| 0         | 0,802685686 | 0,513 | 0,047 | 0         | ependymal | Tgfb2         |
| 0         | 0,777624437 | 0,527 | 0,064 | 0         | ependymal | Nme5          |
| 0         | 0,771561145 | 0,531 | 0,074 | 0         | ependymal | Spata13       |
| 0         | 0,753482976 | 0,589 | 0,103 | 0         | ependymal | Kank1         |
| 0         | 0,704783393 | 0,582 | 0,113 | 0         | ependymal | Nwd1          |
| 6,16E-307 | 1,127226696 | 0,758 | 0,235 | 1,66E-302 | ependymal | Stxbp4        |
| 1,47E-294 | 0,720576606 | 0,515 | 0,104 | 3,95E-290 | ependymal | Pdgfa         |
| 6,42E-293 | 1,142149976 | 0,61  | 0,151 | 1,73E-288 | ependymal | Cfap54        |
| 4,45E-290 | 1,91794717  | 0,951 | 0,809 | 1,20E-285 | ependymal | Slc4a10       |
| 5,75E-287 | 0,826466795 | 0,601 | 0,137 | 1,55E-282 | ependymal | Heg1          |
| 1,36E-283 | 0,818827842 | 0,597 | 0,141 | 3,66E-279 | ependymal | Arhgap42      |
| 1,87E-282 | 1,174570633 | 0,759 | 0,265 | 5,05E-278 | ependymal | Pcbp3         |
| 6,40E-281 | 0,897349002 | 0,613 | 0,15  | 1,72E-276 | ependymal | Antxr1        |
| 9,15E-281 | 1,189846105 | 0,872 | 0,351 | 2,47E-276 | ependymal | Tead1         |
| 5,48E-279 | 1,163071655 | 0,755 | 0,253 | 1,48E-274 | ependymal | Ctnna1        |
| 2,41E-277 | 1,350711458 | 0,817 | 0,327 | 6,48E-273 | ependymal | Mitf          |
| 8,14E-274 | 1,527959629 | 0,992 | 0,777 | 2,19E-269 | ependymal | Agbl4         |
| 9,51E-273 | 1,158483842 | 0,777 | 0,264 | 2,56E-268 | ependymal | Rbms1         |
| 1,83E-271 | 1,278417749 | 0,9   | 0,39  | 4,92E-267 | ependymal | Pdzd2         |
| 2,92E-271 | 1,415158741 | 0,876 | 0,462 | 7,85E-267 | ependymal | Tsc22d1       |
| 8,56E-265 | 0,785143517 | 0,592 | 0,142 | 2,31E-260 | ependymal | Ctnna1        |
| 7,34E-264 | 1,773749608 | 0,948 | 0,654 | 1,98E-259 | ependymal | Wdr17         |
| 2,97E-263 | 0,748115318 | 0,587 | 0,135 | 8,01E-259 | ependymal | Cobll1        |
| 1,72E-262 | 1,1523117   | 0,752 | 0,271 | 4,62E-258 | ependymal | Abhd2         |
| 4,70E-261 | 0,785181726 | 0,603 | 0,146 | 1,27E-256 | ependymal | Pdlim5        |
| 3,53E-252 | 0,667417119 | 0,507 | 0,113 | 9,51E-248 | ependymal | Acad8         |
| 6,52E-250 | 0,712897247 | 0,515 | 0,119 | 1,76E-245 | ependymal | Tmem237       |

|           |             |       |       |           |           |               |
|-----------|-------------|-------|-------|-----------|-----------|---------------|
| 1,57E-245 | 1,142250268 | 0,789 | 0,29  | 4,23E-241 | ependymal | Ror1          |
| 5,08E-244 | 0,92803014  | 0,604 | 0,155 | 1,37E-239 | ependymal | 9530026P05Rik |
| 1,20E-243 | 0,954519782 | 0,732 | 0,239 | 3,23E-239 | ependymal | Cachd1        |
| 2,30E-243 | 1,425603908 | 0,958 | 0,729 | 6,21E-239 | ependymal | Itpr1         |
| 7,38E-243 | 1,142137577 | 0,801 | 0,313 | 1,99E-238 | ependymal | Slc12a2       |
| 1,19E-242 | 1,177872445 | 0,892 | 0,402 | 3,21E-238 | ependymal | Nckap5        |
| 5,48E-240 | 1,03680803  | 0,838 | 0,321 | 1,48E-235 | ependymal | Clmn          |
| 1,91E-237 | 1,105812498 | 0,913 | 0,404 | 5,15E-233 | ependymal | Pitpnc1       |
| 6,51E-237 | 0,777292077 | 0,532 | 0,13  | 1,75E-232 | ependymal | Atp7a         |
| 5,53E-235 | 0,596501841 | 0,52  | 0,116 | 1,49E-230 | ependymal | Vegfa         |
| 1,86E-232 | 1,251902246 | 0,838 | 0,378 | 5,02E-228 | ependymal | Mapk4         |
| 6,85E-231 | 1,341375224 | 0,904 | 0,494 | 1,84E-226 | ependymal | Pid1          |
| 7,33E-231 | 0,938501284 | 0,687 | 0,225 | 1,97E-226 | ependymal | Atp11c        |
| 7,10E-229 | 0,807587206 | 0,576 | 0,158 | 1,91E-224 | ependymal | Cnst          |
| 6,40E-221 | 0,655408136 | 0,534 | 0,129 | 1,73E-216 | ependymal | Myo1e         |
| 3,55E-220 | 0,743623064 | 0,549 | 0,142 | 9,56E-216 | ependymal | Gm5089        |
| 4,58E-218 | 1,235209785 | 0,813 | 0,406 | 1,23E-213 | ependymal | Slc23a2       |
| 4,67E-215 | 1,1242151   | 0,861 | 0,49  | 1,26E-210 | ependymal | Slc22a17      |
| 8,43E-215 | 1,168916266 | 0,944 | 0,64  | 2,27E-210 | ependymal | Wwox          |
| 1,45E-214 | 0,875579505 | 0,752 | 0,276 | 3,89E-210 | ependymal | Psap          |
| 7,92E-214 | 0,834189808 | 0,642 | 0,2   | 2,13E-209 | ependymal | Sgk3          |
| 1,34E-213 | 1,111919879 | 0,987 | 0,92  | 3,62E-209 | ependymal | Exoc4         |
| 1,24E-212 | 1,193914473 | 0,861 | 0,485 | 3,34E-208 | ependymal | Pcnx          |
| 7,77E-208 | 0,653498946 | 0,535 | 0,14  | 2,09E-203 | ependymal | Prtg          |
| 3,59E-203 | 0,705154515 | 0,507 | 0,13  | 9,66E-199 | ependymal | Tgfb2         |
| 3,27E-202 | 1,285998182 | 0,906 | 0,577 | 8,80E-198 | ependymal | Naaladl2      |
| 4,21E-197 | 1,124064607 | 0,97  | 0,556 | 1,13E-192 | ependymal | Maml2         |
| 2,61E-196 | 0,798462135 | 0,634 | 0,209 | 7,02E-192 | ependymal | Cdc14b        |
| 4,85E-194 | 1,299984829 | 0,942 | 0,708 | 1,31E-189 | ependymal | Tmem108       |
| 1,49E-193 | 0,718136717 | 0,701 | 0,228 | 4,01E-189 | ependymal | Utrn          |
| 3,01E-188 | 0,930708978 | 0,863 | 0,424 | 8,11E-184 | ependymal | Pacrg         |
| 5,99E-181 | 0,993709502 | 0,78  | 0,362 | 1,61E-176 | ependymal | Stim2         |
| 9,82E-180 | 0,689307153 | 0,573 | 0,172 | 2,65E-175 | ependymal | Wis           |
| 1,99E-179 | 0,669196661 | 0,908 | 0,386 | 5,35E-175 | ependymal | Erbp4         |
| 2,64E-175 | 0,718540643 | 0,558 | 0,179 | 7,12E-171 | ependymal | Gas6          |
| 4,37E-173 | 0,78324386  | 0,673 | 0,256 | 1,18E-168 | ependymal | St5           |
| 7,26E-173 | 1,187065973 | 0,773 | 0,324 | 1,96E-168 | ependymal | Cmss1         |
| 5,91E-172 | 1,036595696 | 0,638 | 0,25  | 1,59E-167 | ependymal | Brwd3         |
| 5,23E-170 | 1,058218743 | 0,777 | 0,386 | 1,41E-165 | ependymal | Kcnh1         |
| 4,20E-169 | 1,157312572 | 0,897 | 0,619 | 1,13E-164 | ependymal | Pip5k1b       |
| 6,99E-166 | 0,625579684 | 0,528 | 0,154 | 1,88E-161 | ependymal | Ston2         |
| 1,43E-165 | 0,97024084  | 0,908 | 0,635 | 3,85E-161 | ependymal | Shank2        |
| 2,99E-164 | 1,212340939 | 0,985 | 0,95  | 8,06E-160 | ependymal | Frrmpd4       |

|           |             |       |       |           |           |               |
|-----------|-------------|-------|-------|-----------|-----------|---------------|
| 2,05E-163 | 0,575236859 | 0,538 | 0,158 | 5,51E-159 | ependymal | Myo10         |
| 1,08E-162 | 0,849146432 | 0,785 | 0,385 | 2,90E-158 | ependymal | 4632427E13Rik |
| 1,95E-162 | 0,896555731 | 0,754 | 0,348 | 5,25E-158 | ependymal | Wwc1          |
| 1,03E-160 | 0,836024705 | 0,649 | 0,26  | 2,76E-156 | ependymal | Larp1b        |
| 1,16E-160 | 0,78439724  | 0,592 | 0,202 | 3,13E-156 | ependymal | Lhfp          |
| 1,92E-158 | 0,60621649  | 0,537 | 0,17  | 5,17E-154 | ependymal | Nt5dc1        |
| 5,63E-156 | 0,639852002 | 0,592 | 0,198 | 1,52E-151 | ependymal | Tmem164       |
| 4,36E-155 | 0,826165111 | 0,985 | 0,893 | 1,17E-150 | ependymal | Ddx5          |
| 1,24E-153 | 0,796529663 | 0,68  | 0,285 | 3,35E-149 | ependymal | Wdpcp         |
| 2,56E-152 | 0,674608838 | 0,593 | 0,213 | 6,89E-148 | ependymal | Ccdc191       |
| 1,04E-151 | 0,74065268  | 0,773 | 0,324 | 2,80E-147 | ependymal | Camk2d        |
| 1,48E-151 | 0,564481438 | 0,707 | 0,247 | 3,98E-147 | ependymal | Ptprm         |
| 1,69E-151 | 0,672021793 | 0,606 | 0,218 | 4,55E-147 | ependymal | Cuedc1        |
| 4,23E-151 | 0,908893446 | 0,842 | 0,507 | 1,14E-146 | ependymal | Fars2         |
| 8,81E-151 | 0,886633924 | 0,755 | 0,364 | 2,37E-146 | ependymal | Sntb2         |
| 1,59E-150 | 0,869595898 | 0,958 | 0,643 | 4,28E-146 | ependymal | Rfx3          |
| 9,60E-150 | 0,746310268 | 0,569 | 0,202 | 2,59E-145 | ependymal | Myo5b         |
| 1,09E-149 | 0,855539717 | 0,8   | 0,422 | 2,93E-145 | ependymal | Ttli5         |
| 9,54E-149 | 0,920798732 | 0,954 | 0,65  | 2,57E-144 | ependymal | Plcl1         |
| 1,62E-148 | 0,734280951 | 0,556 | 0,197 | 4,36E-144 | ependymal | Grb10         |
| 1,83E-147 | 0,842505653 | 0,724 | 0,339 | 4,94E-143 | ependymal | Ccdc30        |
| 2,50E-140 | 0,912991406 | 0,755 | 0,37  | 6,74E-136 | ependymal | Fhit          |
| 2,61E-138 | 0,56676811  | 0,586 | 0,199 | 7,03E-134 | ependymal | Cux2          |
| 4,49E-135 | 0,812074984 | 0,701 | 0,327 | 1,21E-130 | ependymal | Cpeb2         |
| 5,47E-134 | 0,568382434 | 0,582 | 0,213 | 1,47E-129 | ependymal | Srsf2         |
| 1,09E-133 | 0,611408958 | 0,569 | 0,211 | 2,94E-129 | ependymal | Gtf2ird1      |
| 1,96E-133 | 0,615176675 | 0,511 | 0,172 | 5,29E-129 | ependymal | Bcl2          |
| 7,52E-132 | 0,81148985  | 0,683 | 0,301 | 2,03E-127 | ependymal | Dnah9         |
| 4,40E-131 | 0,744292073 | 0,693 | 0,331 | 1,18E-126 | ependymal | Fndc3b        |
| 2,48E-128 | 0,556312529 | 0,556 | 0,199 | 6,67E-124 | ependymal | Rrbp1         |
| 3,74E-128 | 0,788243824 | 0,945 | 0,802 | 1,01E-123 | ependymal | Rsrp1         |
| 6,25E-128 | 0,592649276 | 0,517 | 0,181 | 1,68E-123 | ependymal | Plekha7       |
| 7,23E-128 | 0,658748603 | 0,624 | 0,26  | 1,95E-123 | ependymal | Pced1b        |
| 1,50E-127 | 0,520157738 | 0,665 | 0,241 | 4,05E-123 | ependymal | Dock1         |
| 9,26E-124 | 0,691578926 | 0,979 | 0,727 | 2,50E-119 | ependymal | Nfia          |
| 1,97E-123 | 0,696835082 | 0,662 | 0,301 | 5,30E-119 | ependymal | Stim1         |
| 1,84E-122 | 0,592858705 | 0,531 | 0,202 | 4,95E-118 | ependymal | Snhg20        |
| 1,98E-122 | 0,66965013  | 0,597 | 0,253 | 5,33E-118 | ependymal | Mapk9         |
| 9,97E-122 | 0,635842297 | 0,608 | 0,239 | 2,69E-117 | ependymal | Plcb4         |
| 2,84E-121 | 0,683901846 | 0,996 | 0,916 | 7,66E-117 | ependymal | Rora          |
| 1,35E-120 | 0,587572627 | 0,554 | 0,21  | 3,62E-116 | ependymal | Spats2l       |
| 5,51E-119 | 0,985582834 | 0,942 | 0,743 | 1,48E-114 | ependymal | Eti4          |
| 3,53E-117 | 0,654075429 | 0,603 | 0,259 | 9,51E-113 | ependymal | Tbcel         |

|           |             |       |       |           |           |               |
|-----------|-------------|-------|-------|-----------|-----------|---------------|
| 3,70E-117 | 0,68961488  | 0,715 | 0,372 | 9,97E-113 | ependymal | D430042009Rik |
| 1,37E-116 | 0,618625101 | 0,645 | 0,251 | 3,70E-112 | ependymal | Pdzrn3        |
| 2,05E-111 | 0,531814155 | 0,518 | 0,195 | 5,51E-107 | ependymal | R3hcc1l       |
| 4,74E-111 | 0,733785915 | 0,904 | 0,746 | 1,28E-106 | ependymal | Ehbp1         |
| 8,07E-110 | 0,52384316  | 0,559 | 0,215 | 2,17E-105 | ependymal | Cald1         |
| 1,71E-108 | 0,681348359 | 0,654 | 0,296 | 4,61E-104 | ependymal | Cdh18         |
| 7,55E-108 | 0,672346098 | 0,939 | 0,763 | 2,03E-103 | ependymal | Stox2         |
| 8,18E-108 | 0,602425119 | 0,589 | 0,238 | 2,20E-103 | ependymal | Ccbe1         |
| 2,42E-107 | 0,809114828 | 0,692 | 0,382 | 6,51E-103 | ependymal | Myrip         |
| 1,01E-106 | 0,581215129 | 0,52  | 0,207 | 2,72E-102 | ependymal | Crocc         |
| 1,33E-106 | 0,505780505 | 0,53  | 0,197 | 3,57E-102 | ependymal | Sytl2         |
| 4,03E-104 | 0,527013064 | 0,518 | 0,198 | 1,09E-99  | ependymal | Gm48742       |
| 2,04E-103 | 0,51409558  | 0,5   | 0,192 | 5,48E-99  | ependymal | Kiz           |
| 4,53E-103 | 0,526392369 | 0,503 | 0,188 | 1,22E-98  | ependymal | Prdm5         |
| 4,74E-103 | 0,764784222 | 0,737 | 0,422 | 1,28E-98  | ependymal | Arid5b        |
| 4,96E-103 | 0,59057854  | 0,554 | 0,239 | 1,34E-98  | ependymal | Cep162        |
| 1,13E-99  | 0,662694909 | 0,932 | 0,783 | 3,03E-95  | ependymal | Tcf12         |
| 3,10E-99  | 1,087210558 | 0,861 | 0,519 | 8,34E-95  | ependymal | Gm42418       |
| 1,09E-98  | 0,659004776 | 0,721 | 0,399 | 2,95E-94  | ependymal | Luzp1         |
| 1,26E-98  | 0,768021114 | 0,72  | 0,407 | 3,40E-94  | ependymal | Aff2          |
| 1,68E-98  | 0,570115247 | 0,852 | 0,5   | 4,52E-94  | ependymal | Trps1         |
| 2,29E-98  | 0,698547056 | 0,835 | 0,616 | 6,17E-94  | ependymal | Srsf5         |
| 2,50E-98  | 0,651975628 | 0,67  | 0,341 | 6,75E-94  | ependymal | Peak1         |
| 6,55E-98  | 0,610303528 | 0,573 | 0,268 | 1,77E-93  | ependymal | Nufip2        |
| 1,82E-97  | 0,53092769  | 0,524 | 0,221 | 4,90E-93  | ependymal | Ubxn11        |
| 1,06E-96  | 0,683937204 | 0,989 | 0,938 | 2,85E-92  | ependymal | Kcnq1ot1      |
| 4,88E-96  | 0,687810898 | 0,785 | 0,518 | 1,31E-91  | ependymal | Sgms1         |
| 1,64E-95  | 0,633868252 | 0,804 | 0,514 | 4,42E-91  | ependymal | Daam1         |
| 3,24E-95  | 0,658282723 | 0,862 | 0,631 | 8,74E-91  | ependymal | Nedd4         |
| 2,69E-93  | 0,516877769 | 0,782 | 0,384 | 7,25E-89  | ependymal | Zfp536        |
| 3,11E-93  | 0,61258034  | 0,668 | 0,345 | 8,39E-89  | ependymal | Phkb          |
| 7,04E-93  | 0,559472332 | 0,62  | 0,299 | 1,90E-88  | ependymal | Fam184a       |
| 1,36E-92  | 0,936026452 | 0,852 | 0,62  | 3,65E-88  | ependymal | Car10         |
| 4,68E-92  | 0,687077645 | 0,839 | 0,627 | 1,26E-87  | ependymal | Pcca          |
| 5,11E-92  | 0,608940341 | 0,746 | 0,432 | 1,38E-87  | ependymal | Fgd4          |
| 1,46E-91  | 0,525472685 | 0,525 | 0,228 | 3,94E-87  | ependymal | Arhgef18      |
| 1,86E-91  | 0,521808892 | 0,506 | 0,209 | 5,02E-87  | ependymal | Itpk1         |
| 1,15E-90  | 0,629507511 | 0,939 | 0,723 | 3,10E-86  | ependymal | Mir100hg      |
| 1,32E-90  | 0,515014664 | 0,53  | 0,231 | 3,57E-86  | ependymal | lft74         |
| 3,37E-90  | 0,582859366 | 0,658 | 0,346 | 9,09E-86  | ependymal | Fndc3a        |
| 5,54E-90  | 0,668965575 | 0,687 | 0,374 | 1,49E-85  | ependymal | Tmtc1         |
| 6,91E-90  | 0,584133631 | 0,58  | 0,263 | 1,86E-85  | ependymal | Zfx4          |
| 1,23E-89  | 0,539441912 | 0,585 | 0,268 | 3,32E-85  | ependymal | Zfand6        |

|          |             |       |       |          |           |               |
|----------|-------------|-------|-------|----------|-----------|---------------|
| 1,73E-89 | 0,537620521 | 0,645 | 0,32  | 4,65E-85 | ependymal | Firre         |
| 7,48E-88 | 0,525472732 | 0,61  | 0,303 | 2,01E-83 | ependymal | Srsf1         |
| 9,49E-88 | 0,551502851 | 0,57  | 0,273 | 2,56E-83 | ependymal | Srsf10        |
| 8,01E-87 | 0,605006553 | 0,631 | 0,323 | 2,16E-82 | ependymal | Fam110b       |
| 5,50E-85 | 0,611801558 | 0,807 | 0,514 | 1,48E-80 | ependymal | Ablim1        |
| 4,77E-84 | 0,61370079  | 0,735 | 0,439 | 1,28E-79 | ependymal | Armc9         |
| 8,99E-84 | 0,585274672 | 0,513 | 0,233 | 2,42E-79 | ependymal | Mam1d1        |
| 9,26E-84 | 0,558378687 | 0,587 | 0,291 | 2,50E-79 | ependymal | Pikfyve       |
| 2,60E-83 | 0,533868505 | 0,563 | 0,271 | 7,01E-79 | ependymal | Zkscan3       |
| 4,55E-82 | 0,54825805  | 0,665 | 0,362 | 1,23E-77 | ependymal | Tnrc18        |
| 5,22E-82 | 0,502690606 | 0,908 | 0,731 | 1,40E-77 | ependymal | Ahcy12        |
| 1,39E-80 | 0,581137213 | 0,93  | 0,842 | 3,74E-76 | ependymal | Ppp1r9a       |
| 2,01E-80 | 0,532552319 | 0,62  | 0,315 | 5,42E-76 | ependymal | Znrf3         |
| 4,37E-79 | 0,611197297 | 0,789 | 0,555 | 1,18E-74 | ependymal | Mtdh          |
| 2,26E-78 | 0,506779902 | 0,583 | 0,28  | 6,09E-74 | ependymal | Myo1d         |
| 4,24E-78 | 0,551892975 | 0,599 | 0,313 | 1,14E-73 | ependymal | Fsd11         |
| 4,35E-78 | 0,573803336 | 0,755 | 0,472 | 1,17E-73 | ependymal | Dtx3          |
| 1,03E-77 | 0,52542279  | 0,607 | 0,309 | 2,78E-73 | ependymal | Tmem245       |
| 2,61E-77 | 0,601873994 | 0,735 | 0,46  | 7,04E-73 | ependymal | 5031425E22Rik |
| 7,33E-76 | 0,551902943 | 0,673 | 0,393 | 1,97E-71 | ependymal | Lrp6          |
| 1,41E-75 | 0,531891259 | 0,582 | 0,296 | 3,80E-71 | ependymal | Ppargc1a      |
| 4,25E-75 | 0,523531911 | 0,977 | 0,947 | 1,14E-70 | ependymal | Snmp70        |
| 4,41E-75 | 0,579357157 | 0,906 | 0,795 | 1,19E-70 | ependymal | Aopep         |
| 7,62E-75 | 0,574932641 | 0,634 | 0,294 | 2,05E-70 | ependymal | Grm8          |
| 7,70E-75 | 0,538119774 | 0,627 | 0,353 | 2,07E-70 | ependymal | Hnrph1        |
| 9,80E-74 | 0,500162995 | 0,639 | 0,326 | 2,64E-69 | ependymal | Csgalnact1    |
| 1,77E-73 | 0,529474081 | 0,542 | 0,27  | 4,77E-69 | ependymal | Tgfb3         |
| 2,01E-72 | 0,531031069 | 0,997 | 0,812 | 5,43E-68 | ependymal | Zbtb20        |
| 2,54E-72 | 0,635812246 | 0,689 | 0,399 | 6,84E-68 | ependymal | Flrt2         |
| 8,10E-72 | 0,609504671 | 0,846 | 0,697 | 2,18E-67 | ependymal | Setd5         |
| 2,41E-71 | 0,573906962 | 0,755 | 0,5   | 6,49E-67 | ependymal | Dock7         |
| 6,03E-71 | 0,558700592 | 0,818 | 0,594 | 1,62E-66 | ependymal | Igf1r         |
| 2,01E-70 | 0,518352508 | 0,57  | 0,303 | 5,42E-66 | ependymal | Cnm2          |
| 3,57E-70 | 0,542392166 | 0,587 | 0,319 | 9,62E-66 | ependymal | Nfyc          |
| 9,86E-70 | 0,55434306  | 0,701 | 0,45  | 2,66E-65 | ependymal | Gnas          |
| 8,54E-69 | 0,51714139  | 0,963 | 0,906 | 2,30E-64 | ependymal | Prpf4b        |
| 3,78E-68 | 0,556697301 | 0,732 | 0,479 | 1,02E-63 | ependymal | Dync2h1       |
| 3,64E-67 | 0,582696338 | 0,849 | 0,68  | 9,79E-63 | ependymal | Fmnl2         |
| 4,88E-67 | 0,575035567 | 0,903 | 0,702 | 1,31E-62 | ependymal | Magi1         |
| 9,33E-66 | 0,652099409 | 0,646 | 0,377 | 2,51E-61 | ependymal | Cdk8          |
| 1,16E-65 | 0,50063946  | 0,514 | 0,261 | 3,13E-61 | ependymal | Miga1         |
| 2,18E-65 | 0,747415992 | 0,59  | 0,325 | 5,86E-61 | ependymal | Slit2         |
| 7,75E-64 | 0,517575458 | 0,858 | 0,696 | 2,09E-59 | ependymal | Pabpn1        |

|          |             |       |       |          |           |         |
|----------|-------------|-------|-------|----------|-----------|---------|
| 6,49E-62 | 0,556248673 | 0,713 | 0,477 | 1,75E-57 | ependymal | Akap9   |
| 9,09E-62 | 0,53110497  | 0,77  | 0,566 | 2,45E-57 | ependymal | Chchd3  |
| 1,87E-61 | 0,507177059 | 0,855 | 0,709 | 5,03E-57 | ependymal | Chd6    |
| 3,46E-61 | 0,778961956 | 0,972 | 0,932 | 9,32E-57 | ependymal | Syne1   |
| 1,49E-57 | 0,551717181 | 0,938 | 0,884 | 4,02E-53 | ependymal | Gpm6a   |
| 1,95E-57 | 0,517430277 | 0,672 | 0,41  | 5,26E-53 | ependymal | Sh3rf1  |
| 3,98E-54 | 0,532720657 | 0,632 | 0,406 | 1,07E-49 | ependymal | Atp1b1  |
| 5,31E-42 | 0,511316821 | 0,811 | 0,69  | 1,43E-37 | ependymal | Zfp385b |
| 9,31E-41 | 0,578748336 | 0,779 | 0,678 | 2,51E-36 | ependymal | Immp2l  |
| 5,82E-39 | 0,614805934 | 0,527 | 0,317 | 1,57E-34 | ependymal | Pdzrn4  |

|           |             |       |       |           |                   |               |
|-----------|-------------|-------|-------|-----------|-------------------|---------------|
| 0         | 4,148781637 | 1     | 0,097 | 0         | Cd274_Neuroimmune | Reln          |
| 0         | 2,710976315 | 0,959 | 0,114 | 0         | Cd274_Neuroimmune | Dach1         |
| 0         | 2,612830745 | 0,9   | 0,026 | 0         | Cd274_Neuroimmune | Ndnf          |
| 0         | 2,160547478 | 0,952 | 0,228 | 0         | Cd274_Neuroimmune | Utrn          |
| 0         | 1,932017524 | 0,878 | 0,127 | 0         | Cd274_Neuroimmune | Tmem163       |
| 0         | 1,861133728 | 0,859 | 0,159 | 0         | Cd274_Neuroimmune | Cdh4          |
| 0         | 1,839029697 | 0,787 | 0,016 | 0         | Cd274_Neuroimmune | Trp73         |
| 0         | 1,826394017 | 0,804 | 0,129 | 0         | Cd274_Neuroimmune | Hs3st5        |
| 0         | 1,737682178 | 0,809 | 0,078 | 0         | Cd274_Neuroimmune | Cacna2d2      |
| 0         | 1,438610103 | 0,691 | 0,011 | 0         | Cd274_Neuroimmune | Ebf3          |
| 0         | 1,400829863 | 0,611 | 0,031 | 0         | Cd274_Neuroimmune | Gm29683       |
| 0         | 1,07633036  | 0,557 | 0,031 | 0         | Cd274_Neuroimmune | Eln           |
| 3,14E-301 | 1,024615579 | 0,517 | 0,074 | 8,46E-297 | Cd274_Neuroimmune | B130024G19Rik |
| 1,11E-296 | 2,341091852 | 0,987 | 0,452 | 2,99E-292 | Cd274_Neuroimmune | Thsd7b        |
| 1,48E-261 | 1,869946582 | 0,943 | 0,39  | 3,97E-257 | Cd274_Neuroimmune | Maml3         |
| 7,80E-255 | 1,939629419 | 1     | 0,831 | 2,10E-250 | Cd274_Neuroimmune | Fat3          |
| 1,25E-253 | 2,059763036 | 1     | 0,909 | 3,38E-249 | Cd274_Neuroimmune | Kcnb2         |
| 1,66E-253 | 1,328010838 | 0,717 | 0,181 | 4,48E-249 | Cd274_Neuroimmune | Plekha7       |
| 1,25E-252 | 1,545097347 | 0,922 | 0,31  | 3,37E-248 | Cd274_Neuroimmune | Rbms3         |
| 5,82E-244 | 1,827659686 | 0,935 | 0,391 | 1,57E-239 | Cd274_Neuroimmune | Pdzd2         |
| 1,28E-243 | 2,097980277 | 1     | 0,885 | 3,45E-239 | Cd274_Neuroimmune | Robo2         |
| 2,45E-228 | 1,777565553 | 1     | 0,901 | 6,61E-224 | Cd274_Neuroimmune | Clstn2        |
| 3,88E-218 | 1,646842006 | 0,989 | 0,577 | 1,05E-213 | Cd274_Neuroimmune | Msi2          |
| 2,13E-216 | 0,986612995 | 0,526 | 0,102 | 5,75E-212 | Cd274_Neuroimmune | Pou6f2        |
| 5,60E-213 | 2,013072534 | 1     | 0,884 | 1,51E-208 | Cd274_Neuroimmune | Cntnap2       |
| 3,21E-212 | 1,436802318 | 1     | 0,95  | 8,66E-208 | Cd274_Neuroimmune | Nav2          |
| 5,51E-210 | 1,909129734 | 0,998 | 0,796 | 1,48E-205 | Cd274_Neuroimmune | Kcnh7         |
| 3,67E-188 | 1,361656322 | 0,809 | 0,332 | 9,90E-184 | Cd274_Neuroimmune | Fndc3b        |
| 2,78E-181 | 1,149327045 | 0,589 | 0,142 | 7,49E-177 | Cd274_Neuroimmune | Kcnip1        |
| 2,70E-176 | 0,982099543 | 0,5   | 0,106 | 7,26E-172 | Cd274_Neuroimmune | Angpt1        |
| 1,92E-167 | 1,276730937 | 0,987 | 0,84  | 5,18E-163 | Cd274_Neuroimmune | Dync111       |
| 1,45E-163 | 1,298876001 | 0,726 | 0,266 | 3,91E-159 | Cd274_Neuroimmune | Rbms1         |

|           |             |       |       |           |                   |               |
|-----------|-------------|-------|-------|-----------|-------------------|---------------|
| 3,24E-161 | 1,384319383 | 0,972 | 0,62  | 8,73E-157 | Cd274_Neuroimmune | Car10         |
| 7,87E-157 | 1,282716017 | 0,804 | 0,357 | 2,12E-152 | Cd274_Neuroimmune | Cep112        |
| 8,87E-152 | 1,155814204 | 0,998 | 0,947 | 2,39E-147 | Cd274_Neuroimmune | B3galt1       |
| 3,12E-147 | 1,180137268 | 0,998 | 0,907 | 8,41E-143 | Cd274_Neuroimmune | Cacna2d1      |
| 2,40E-138 | 1,251866018 | 0,989 | 0,75  | 6,47E-134 | Cd274_Neuroimmune | Nrg1          |
| 4,20E-137 | 0,903896126 | 0,967 | 0,52  | 1,13E-132 | Cd274_Neuroimmune | Gm42418       |
| 9,51E-134 | 1,189040577 | 0,998 | 0,907 | 2,56E-129 | Cd274_Neuroimmune | Snhg11        |
| 1,94E-125 | 1,015778781 | 0,991 | 0,897 | 5,24E-121 | Cd274_Neuroimmune | Nfib          |
| 3,54E-120 | 1,061580107 | 0,789 | 0,431 | 9,53E-116 | Cd274_Neuroimmune | Ralgps2       |
| 8,27E-118 | 1,021420392 | 0,85  | 0,432 | 2,23E-113 | Cd274_Neuroimmune | Kcnc2         |
| 1,20E-115 | 0,786779814 | 1     | 0,991 | 3,22E-111 | Cd274_Neuroimmune | Nrxn1         |
| 3,81E-115 | 0,951295265 | 1     | 0,98  | 1,03E-110 | Cd274_Neuroimmune | Fam155a       |
| 1,62E-113 | 1,088276967 | 0,746 | 0,37  | 4,36E-109 | Cd274_Neuroimmune | Fmn1          |
| 6,98E-112 | 0,817538184 | 1     | 0,989 | 1,88E-107 | Cd274_Neuroimmune | Lsamp         |
| 6,66E-108 | 0,777020755 | 1     | 0,99  | 1,79E-103 | Cd274_Neuroimmune | Ank3          |
| 2,22E-107 | 0,944159187 | 0,626 | 0,266 | 5,98E-103 | Cd274_Neuroimmune | Pcbp3         |
| 6,92E-107 | 1,133816721 | 0,809 | 0,468 | 1,86E-102 | Cd274_Neuroimmune | Epha3         |
| 4,82E-106 | 1,007150023 | 1     | 0,861 | 1,30E-101 | Cd274_Neuroimmune | Lingo2        |
| 2,75E-99  | 0,973775898 | 0,983 | 0,813 | 7,40E-95  | Cd274_Neuroimmune | Tenm4         |
| 1,43E-98  | 0,925403276 | 0,889 | 0,655 | 3,86E-94  | Cd274_Neuroimmune | Slc2a13       |
| 4,44E-98  | 0,932788129 | 0,983 | 0,9   | 1,19E-93  | Cd274_Neuroimmune | Srgap3        |
| 1,45E-94  | 1,091619697 | 0,711 | 0,366 | 3,91E-90  | Cd274_Neuroimmune | Adcy8         |
| 1,04E-90  | 0,903477826 | 0,974 | 0,857 | 2,80E-86  | Cd274_Neuroimmune | Gpr158        |
| 4,01E-90  | 0,881701924 | 0,937 | 0,666 | 1,08E-85  | Cd274_Neuroimmune | Astn2         |
| 6,74E-85  | 0,870650237 | 0,976 | 0,795 | 1,81E-80  | Cd274_Neuroimmune | Kcnq5         |
| 5,52E-83  | 0,731454196 | 0,928 | 0,672 | 1,49E-78  | Cd274_Neuroimmune | Dnm3          |
| 1,25E-79  | 0,806420982 | 0,987 | 0,847 | 3,37E-75  | Cd274_Neuroimmune | Dscam11       |
| 2,53E-76  | 0,754824276 | 1     | 0,982 | 6,81E-72  | Cd274_Neuroimmune | Plcb1         |
| 8,65E-75  | 0,682827906 | 0,989 | 0,734 | 2,33E-70  | Cd274_Neuroimmune | Cntn5         |
| 3,21E-74  | 0,952594342 | 0,661 | 0,379 | 8,66E-70  | Cd274_Neuroimmune | 5330417C22Rik |
| 3,82E-73  | 0,7441705   | 0,55  | 0,239 | 1,03E-68  | Cd274_Neuroimmune | Mtss1         |
| 3,60E-71  | 0,702732511 | 0,943 | 0,699 | 9,70E-67  | Cd274_Neuroimmune | Gria4         |
| 6,06E-71  | 0,738099034 | 0,943 | 0,847 | 1,63E-66  | Cd274_Neuroimmune | Ncoa1         |
| 7,84E-71  | 0,720831876 | 0,983 | 0,938 | 2,11E-66  | Cd274_Neuroimmune | Kcnq1ot1      |
| 1,97E-65  | 0,652981732 | 0,611 | 0,282 | 5,31E-61  | Cd274_Neuroimmune | Cit           |
| 3,52E-65  | 0,666596418 | 0,987 | 0,945 | 9,49E-61  | Cd274_Neuroimmune | Sgip1         |
| 2,20E-64  | 0,616611243 | 0,998 | 0,988 | 5,92E-60  | Cd274_Neuroimmune | Ctnna2        |
| 4,87E-64  | 0,638395675 | 0,976 | 0,883 | 1,31E-59  | Cd274_Neuroimmune | Gpm6a         |
| 2,77E-61  | 0,731733534 | 0,841 | 0,717 | 7,47E-57  | Cd274_Neuroimmune | Gucy1a2       |
| 1,37E-59  | 0,555954967 | 0,97  | 0,881 | 3,69E-55  | Cd274_Neuroimmune | Ntrk2         |
| 3,89E-58  | 0,785012914 | 0,663 | 0,417 | 1,05E-53  | Cd274_Neuroimmune | Ripor2        |
| 4,95E-58  | 0,667368323 | 0,83  | 0,707 | 1,33E-53  | Cd274_Neuroimmune | Ubr5          |
| 5,29E-58  | 0,65661167  | 0,907 | 0,789 | 1,42E-53  | Cd274_Neuroimmune | A230057D06Rik |

|          |             |       |       |          |                   |               |
|----------|-------------|-------|-------|----------|-------------------|---------------|
| 3,29E-57 | 0,600282452 | 0,983 | 0,894 | 8,86E-53 | Cd274_Neuroimmune | Ddx5          |
| 3,22E-56 | 0,73747683  | 0,774 | 0,527 | 8,67E-52 | Cd274_Neuroimmune | Slc35f1       |
| 5,03E-55 | 0,739045824 | 0,624 | 0,394 | 1,35E-50 | Cd274_Neuroimmune | Hdgfl3        |
| 1,65E-54 | 0,610186862 | 1     | 0,989 | 4,43E-50 | Cd274_Neuroimmune | Mdga2         |
| 3,91E-54 | 0,528710306 | 0,993 | 0,956 | 1,05E-49 | Cd274_Neuroimmune | Ttc3          |
| 2,33E-53 | 0,597251479 | 0,946 | 0,859 | 6,29E-49 | Cd274_Neuroimmune | Ptprg         |
| 6,04E-53 | 0,703783314 | 0,598 | 0,329 | 1,63E-48 | Cd274_Neuroimmune | Kcnk2         |
| 7,81E-51 | 0,536555857 | 0,993 | 0,946 | 2,10E-46 | Cd274_Neuroimmune | Cacna1a       |
| 6,43E-49 | 0,692124331 | 0,807 | 0,688 | 1,73E-44 | Cd274_Neuroimmune | Ralgapa2      |
| 1,09E-48 | 0,712656507 | 0,896 | 0,717 | 2,93E-44 | Cd274_Neuroimmune | Nkain3        |
| 2,15E-48 | 0,516903059 | 0,957 | 0,885 | 5,80E-44 | Cd274_Neuroimmune | Plekha5       |
| 9,09E-45 | 0,64857132  | 0,607 | 0,377 | 2,45E-40 | Cd274_Neuroimmune | Pknox2        |
| 3,03E-44 | 0,665584585 | 0,709 | 0,516 | 8,16E-40 | Cd274_Neuroimmune | Ablim1        |
| 3,47E-44 | 0,604315132 | 0,776 | 0,692 | 9,34E-40 | Cd274_Neuroimmune | Ankrd12       |
| 8,55E-43 | 0,727038065 | 0,874 | 0,759 | 2,30E-38 | Cd274_Neuroimmune | Slc24a3       |
| 6,90E-37 | 0,554374397 | 0,526 | 0,298 | 1,86E-32 | Cd274_Neuroimmune | Zmiz1         |
| 2,26E-36 | 0,520115101 | 0,846 | 0,741 | 6,09E-32 | Cd274_Neuroimmune | Bcl11a        |
| 4,87E-33 | 0,521821701 | 0,724 | 0,504 | 1,31E-28 | Cd274_Neuroimmune | Frm4b         |
| 4,89E-32 | 0,528886679 | 0,5   | 0,298 | 1,32E-27 | Cd274_Neuroimmune | Elavl4        |
| 1,54E-30 | 0,514393558 | 0,661 | 0,516 | 4,15E-26 | Cd274_Neuroimmune | Daam1         |
| 4,96E-26 | 0,510191651 | 0,535 | 0,391 | 1,34E-21 | Cd274_Neuroimmune | Ppp2r2c       |
| 2,19E-23 | 0,511313216 | 0,611 | 0,493 | 5,89E-19 | Cd274_Neuroimmune | A330076H08Rik |
| 2,74E-23 | 0,575063456 | 0,548 | 0,408 | 7,37E-19 | Cd274_Neuroimmune | Aff2          |

|                                             | Blood         |              |        |         |        |       |              | Bone Marrow  |        |         |        |       |              | Lymph Node   |        |         |               |       |               | Spleen        |        |         |               |       |  |
|---------------------------------------------|---------------|--------------|--------|---------|--------|-------|--------------|--------------|--------|---------|--------|-------|--------------|--------------|--------|---------|---------------|-------|---------------|---------------|--------|---------|---------------|-------|--|
|                                             | WT            | Het          | Test   | p-value | FDR    | d     | WT           | Het          | Test   | p-value | FDR    | d     | WT           | Het          | Test   | p-value | FDR           | d     | WT            | Het           | Test   | p-value | FDR           | d     |  |
| <b>(% of total live CD45+ cells)</b>        |               |              |        |         |        |       |              |              |        |         |        |       |              |              |        |         |               |       |               |               |        |         |               |       |  |
| Total B cells                               | 42,23 ± 10,15 | 37,86 ± 9,86 | t-test | 0,2341  | 0,7123 | -0,44 | 18,47 ± 7,28 | 15,27 ± 3,72 | Wcc    | 0,0636  | 0,7952 | -0,56 | 41,41 ± 5,06 | 36,69 ± 5,53 | t-test | 0,0238  | 0,2979        | -0,89 | 55,45 ± 3,75  | 53,83 ± 2,05  | Welch  | 0,1658  | 0,6907        | -0,55 |  |
| Total CD4+ T-cells                          | 13,03 ± 2,15  | 12,83 ± 2,10 | t-test | 0,7964  | 0,9765 | -0,09 | 1,21 ± 0,98  | 1,09 ± 0,62  | Wcc    | 0,9131  | 0,9720 | -0,14 | 28,60 ± 1,96 | 31,65 ± 2,41 | t-test | 0,0009  | <b>0,0230</b> | 1,38  | 17,98 ± 2,80  | 17,46 ± 1,96  | Wcc    | 0,5194  | 0,8943        | -0,22 |  |
| Total CD8+ T-cells                          | 13,21 ± 3,36  | 13,38 ± 3,11 | Wcc    | 0,5532  | 0,8779 | 0,05  | 0,90 ± 0,51  | 0,89 ± 0,33  | Wcc    | 0,9304  | 0,9720 | -0,02 | 21,51 ± 2,67 | 23,34 ± 3,23 | t-test | 0,1086  | 0,4732        | 0,62  | 12,07 ± 2,48  | 12,07 ± 1,68  | Wcc    | 0,7870  | 0,8943        | 0,00  |  |
| Total NK cells                              | 7,05 ± 2,43   | 7,24 ± 2,07  | t-test | 0,8203  | 0,9765 | 0,08  | 1,90 ± 0,33  | 1,70 ± 0,39  | Wcc    | 0,1494  | 0,9720 | -0,57 | 1,17 ± 0,13  | 1,10 ± 0,12  | t-test | 0,1280  | 0,4732        | -0,58 | 3,50 ± 0,50   | 4,20 ± 0,55   | t-test | 0,0011  | <b>0,0275</b> | 1,33  |  |
| Total Granulocytes                          | 13,63 ± 2,51  | 17,33 ± 3,64 | t-test | 0,0028  | 0,0699 | 1,17  | 49,80 ± 8,21 | 54,16 ± 3,44 | Wcc    | 0,0275  | 0,6881 | 0,70  | 0,81 ± 0,31  | 0,76 ± 0,30  | t-test | 0,6633  | 0,7311        | -0,16 | 4,38 ± 1,54   | 5,46 ± 1,63   | t-test | 0,0736  | 0,6131        | 0,68  |  |
| Total Monocytes                             | 7,11 ± 2,02   | 7,88 ± 1,82  | t-test | 0,2759  | 0,7123 | 0,40  | 11,39 ± 3,40 | 10,27 ± 1,29 | Wcc    | 0,3947  | 0,9720 | -0,44 | 1,11 ± 0,51  | 0,87 ± 0,37  | t-test | 0,1680  | 0,5251        | -0,53 | 1,46 ± 0,57   | 1,94 ± 0,74   | t-test | 0,0603  | 0,6131        | 0,72  |  |
| Total CD11b+ FcR+ Myeloid cells             | 1,69 ± 0,78   | 1,46 ± 0,56  | t-test | 0,3478  | 0,7246 | -0,34 | 13,80 ± 3,72 | 14,23 ± 2,65 | Wcc    | 0,8272  | 0,9720 | 0,13  | 1,75 ± 0,54  | 1,99 ± 0,62  | Wcc    | 0,4069  | 0,6334        | 0,40  | 1,84 ± 0,42   | 1,73 ± 0,50   | Wcc    | 0,1342  | 0,6710        | -0,24 |  |
| <b>B cells (% of B cells)</b>               |               |              |        |         |        |       |              |              |        |         |        |       |              |              |        |         |               |       |               |               |        |         |               |       |  |
| CD138+ B cells                              | 6,26 ± 1,56   | 5,14 ± 1,21  | Wcc    | 0,0418  | 0,5222 | -0,80 | 16,59 ± 6,28 | 15,26 ± 4,14 | Wcc    | 0,8443  | 0,9720 | -0,25 | 2,01 ± 1,17  | 1,49 ± 1,13  | Wcc    | 0,2386  | 0,5491        | -0,45 | 1,33 ± 0,63   | 1,32 ± 0,52   | t-test | 0,9636  | 0,9636        | -0,02 |  |
| CD27-/CD138low B cells                      | 91,47 ± 1,73  | 92,33 ± 1,18 | t-test | 0,1157  | 0,7123 | 0,58  | 70,59 ± 6,28 | 71,43 ± 4,11 | t-test | 0,6706  | 0,9720 | 0,16  | 92,84 ± 2,30 | 92,98 ± 2,53 | t-test | 0,8801  | 0,8801        | 0,06  | 89,62 ± 4,01  | 89,49 ± 3,37  | Wcc    | 0,6473  | 0,8943        | -0,03 |  |
| CD27+/CD138low B cells                      | 2,15 ± 0,34   | 2,43 ± 0,52  | Wcc    | 0,1007  | 0,7123 | 0,61  | 12,64 ± 3,80 | 13,02 ± 3,95 | t-test | 0,7935  | 0,9720 | 0,10  | 4,99 ± 1,37  | 5,34 ± 1,72  | t-test | 0,5539  | 0,6924        | 0,22  | 8,89 ± 4,06   | 9,05 ± 3,17   | Wcc    | 0,5467  | 0,8943        | 0,04  |  |
| <b>CD4+ T-cells (% of CD4+ T-cells)</b>     |               |              |        |         |        |       |              |              |        |         |        |       |              |              |        |         |               |       |               |               |        |         |               |       |  |
| CD44-/CD62L+ Naive CD4+ T-cells             | 63,42 ± 5,28  | 62,91 ± 4,19 | Wcc    | 0,6073  | 0,8930 | -0,11 | 14,05 ± 6,03 | 17,20 ± 7,57 | Wcc    | 0,2301  | 0,9720 | 0,46  | 73,30 ± 2,54 | 75,52 ± 3,34 | t-test | 0,0553  | 0,3613        | 0,74  | 41,94 ± 11,21 | 45,29 ± 10,49 | t-test | 0,4050  | 0,8943        | 0,31  |  |
| CD44+/CD62L+ Central Memory CD4+ T-cells    | 3,65 ± 1,41   | 4,05 ± 1,61  | Wcc    | 0,2948  | 0,7123 | 0,27  | 10,05 ± 4,61 | 8,52 ± 2,67  | t-test | 0,2787  | 0,9720 | -0,41 | 7,98 ± 1,28  | 7,65 ± 1,15  | t-test | 0,4814  | 0,6334        | -0,27 | 9,45 ± 3,09   | 9,80 ± 2,65   | t-test | 0,7429  | 0,8943        | 0,12  |  |
| CD44+/CD62L- Effector (Memory) CD4+ T-cells | 20,44 ± 3,70  | 19,94 ± 2,78 | t-test | 0,6748  | 0,9372 | -0,15 | 72,59 ± 8,83 | 71,27 ± 7,93 | t-test | 0,6748  | 0,9720 | -0,16 | 14,53 ± 1,26 | 13,01 ± 2,62 | Welch  | 0,0578  | 0,3613        | -0,73 | 36,33 ± 7,01  | 33,52 ± 6,84  | Wcc    | 0,2360  | 0,7375        | -0,41 |  |
| CD44-/CD62L- CD4+ T-cells                   | 12,48 ± 2,40  | 13,11 ± 2,44 | t-test | 0,4799  | 0,8779 | 0,26  | 3,29 ± 2,27  | 3,02 ± 2,73  | t-test | 0,7732  | 0,9720 | -0,11 | 4,18 ± 1,36  | 3,82 ± 1,02  | t-test | 0,4232  | 0,6334        | -0,30 | 12,28 ± 7,26  | 11,42 ± 6,14  | t-test | 0,7273  | 0,8943        | -0,13 |  |
| <b>CD8+ T-cells (% of CD8+ T-cells)</b>     |               |              |        |         |        |       |              |              |        |         |        |       |              |              |        |         |               |       |               |               |        |         |               |       |  |
| CD44-/CD62L+ Naive CD8+ T-cells             | 65,25 ± 4,49  | 65,48 ± 4,97 | t-test | 0,8946  | 0,9842 | 0,05  | 42,24 ± 9,72 | 41,84 ± 8,36 | t-test | 0,9054  | 0,9720 | -0,04 | 83,57 ± 2,08 | 84,87 ± 3,20 | t-test | 0,2084  | 0,5491        | 0,48  | 68,63 ± 7,77  | 68,52 ± 5,70  | Wcc    | 0,5743  | 0,8943        | -0,02 |  |
| CD44+/CD62L+ Central Memory CD8+ T-cells    | 18,80 ± 4,22  | 19,13 ± 4,58 | Wcc    | 0,9842  | 0,9842 | 0,07  | 34,70 ± 7,27 | 33,29 ± 4,73 | t-test | 0,5393  | 0,9720 | -0,23 | 12,08 ± 2,22 | 11,30 ± 2,67 | t-test | 0,4000  | 0,6334        | -0,32 | 18,83 ± 4,10  | 20,47 ± 5,67  | t-test | 0,3765  | 0,8943        | 0,33  |  |
| CD44+/CD62L- Effector (Memory) CD8+ T-cells | 9,12 ± 2,51   | 8,01 ± 2,84  | Wcc    | 0,3134  | 0,7123 | -0,41 | 20,53 ± 7,25 | 22,56 ± 7,37 | t-test | 0,4610  | 0,9720 | 0,28  | 2,53 ± 0,56  | 2,30 ± 0,96  | t-test | 0,4318  | 0,6334        | -0,30 | 6,09 ± 2,26   | 6,03 ± 2,83   | Wcc    | 0,5747  | 0,8943        | -0,02 |  |
| CD44-/CD62L- CD8+ T-cells                   | 6,81 ± 1,74   | 7,38 ± 2,50  | Wcc    | 0,9527  | 0,9842 | 0,26  | 2,52 ± 2,35  | 2,29 ± 1,92  | t-test | 0,7730  | 0,9720 | -0,11 | 1,83 ± 0,76  | 1,52 ± 0,69  | t-test | 0,2524  | 0,5491        | -0,43 | 6,45 ± 5,53   | 4,98 ± 4,13   | Wcc    | 0,5467  | 0,8943        | -0,30 |  |
| <b>NK cells (% of NK cells)</b>             |               |              |        |         |        |       |              |              |        |         |        |       |              |              |        |         |               |       |               |               |        |         |               |       |  |
| CD27-/CD62L+                                | 65,17 ± 4,92  | 63,38 ± 4,39 | t-test | 0,2929  | 0,7123 | -0,38 | 10,06 ± 2,71 | 10,56 ± 2,69 | t-test | 0,6191  | 0,9720 | 0,19  | 28,22 ± 3,87 | 30,65 ± 4,52 | t-test | 0,1325  | 0,4732        | 0,58  | 35,93 ± 5,31  | 36,58 ± 5,79  | t-test | 0,7514  | 0,8943        | 0,12  |  |
| CD27+/CD62L+                                | 17,57 ± 4,29  | 19,26 ± 4,30 | t-test | 0,2848  | 0,7123 | 0,39  | 66,94 ± 4,93 | 66,19 ± 4,67 | t-test | 0,6777  | 0,9720 | -0,16 | 51,38 ± 6,01 | 49,01 ± 8,02 | t-test | 0,3794  | 0,6334        | -0,33 | 27,20 ± 7,02  | 27,89 ± 5,64  | t-test | 0,7663  | 0,8943        | 0,11  |  |
| CD27+/CD62L-                                | 4,55 ± 1,60   | 5,16 ± 1,11  | t-test | 0,2254  | 0,7123 | 0,45  | 20,09 ± 4,39 | 20,15 ± 3,78 | t-test | 0,9720  | 0,9720 | 0,01  | 13,46 ± 3,83 | 12,87 ± 3,58 | t-test | 0,6726  | 0,7311        | -0,16 | 23,35 ± 6,35  | 23,18 ± 3,66  | Welch  | 0,9285  | 0,9636        | -0,03 |  |
| CD27-/CD62L-                                | 12,73 ± 5,55  | 12,22 ± 2,22 | Welch  | 0,7428  | 0,9765 | -0,12 | 2,92 ± 1,27  | 3,11 ± 1,86  | Wcc    | 0,9652  | 0,9720 | 0,12  | 6,95 ± 4,34  | 7,45 ± 4,82  | Wcc    | 0,7767  | 0,8090        | 0,11  | 13,52 ± 8,13  | 12,36 ± 7,72  | Wcc    | 0,8516  | 0,9256        | -0,15 |  |
| <b>Monocytes (% of Monocytes)</b>           |               |              |        |         |        |       |              |              |        |         |        |       |              |              |        |         |               |       |               |               |        |         |               |       |  |
| CD11b-/CD62L+                               | 0,31 ± 0,20   | 0,31 ± 0,18  | t-test | 0,9493  | 0,9842 | -0,02 | 10,54 ± 2,81 | 9,99 ± 1,79  | t-test | 0,5305  | 0,9720 | -0,24 | 1,70 ± 1,47  | 1,19 ± 0,86  | t-test | 0,2636  | 0,5491        | -0,42 | 1,87 ± 1,76   | 1,26 ± 1,20   | Wcc    | 0,3275  | 0,8943        | -0,41 |  |
| CD11b+/CD62L-                               | 62,81 ± 7,55  | 61,45 ± 5,25 | t-test | 0,5619  | 0,8779 | -0,21 | 9,27 ± 3,03  | 8,77 ± 3,41  | t-test | 0,6777  | 0,9720 | -0,16 | 16,13 ± 7,83 | 17,96 ± 5,54 | t-test | 0,4713  | 0,6334        | 0,27  | 40,09 ± 8,42  | 44,40 ± 6,15  | t-test | 0,1178  | 0,6710        | 0,59  |  |
| CD11b+/CD62L+                               | 36,79 ± 7,59  | 38,22 ± 5,22 | t-test | 0,5431  | 0,8779 | 0,22  | 79,99 ± 4,92 | 81,07 ± 4,01 | t-test | 0,5210  | 0,9720 | 0,24  | 81,91 ± 8,12 | 80,61 ± 5,88 | t-test | 0,6233  | 0,7311        | -0,18 | 56,88 ± 7,74  | 53,52 ± 6,44  | t-test | 0,2049  | 0,7310        | -0,47 |  |
